1  
2  
3  
4  
5  
6  
7  
8  
9  
10  
11  
12  
13  
14  
15  
16  
17  
18  
19  
20  
21  
22  
23  
24  
25  
26  
27  
28

**Nanchangmycin regulates FYN, FAK and ERK to control the fibrotic activity  
of hepatic stellate cells**

Wenyang Li<sup>1,2</sup>, Jennifer Y. Chen<sup>1,2</sup>, Cheng Sun<sup>1,2</sup>, Robert P. Sparks<sup>1,2</sup>, Lorena Pantano<sup>3</sup>,  
Raza-Ur Rahman<sup>1,2</sup>, Sean P. Moran<sup>1,2</sup>, Joshua V. Pondick<sup>1,2</sup>, Rory Kirchner<sup>3</sup>, David Wrobel<sup>2</sup>,  
Michael Bieler<sup>5</sup>, Shannan J. Ho Sui<sup>3</sup>, Julia F. Doerner<sup>5</sup>, Jörg F. Rippmann<sup>5</sup>, Alan C.  
Mullen<sup>1,2,4\*</sup>

1. Gastrointestinal Unit, Massachusetts General Hospital, Boston, MA, USA
2. Harvard Medical School, Boston, MA, USA
3. Harvard T.H. Chan School of Public Health, Boston, MA, USA
4. Harvard Stem Cell Institute, Cambridge, MA, USA
5. Boehringer Ingelheim Pharma GmbH & Co. KG, Biberach a.d. Riss, Germany

\* Corresponding author. Thier 306B, 55 Fruit Street, Massachusetts General Hospital,  
Boston, MA 02114, USA. Email: [acmullen@mgh.harvard.edu](mailto:acmullen@mgh.harvard.edu)

Current Addresses:

Wenyang Li: College of Chemistry and Molecular Engineering, Peking University, Beijing,  
100871, China

Jennifer Y. Chen: Department of Medicine, University of California, San Francisco, San  
Francisco, CA 94115, USA; Liver Center, Department of Medicine, University of California,  
San Francisco, San Francisco, CA 94143, USA

29 **Abstract**

30

31 Chronic liver injury causes fibrosis, characterized by the formation of scar tissue resulting from  
32 excessive accumulation of extracellular matrix (ECM) proteins. Hepatic stellate cell (HSC)  
33 myofibroblasts are the primary cell type responsible for liver fibrosis, yet there are currently no  
34 therapies directed at inhibiting the activity of HSC myofibroblasts. To search for potential anti-  
35 fibrotic drugs, we performed a high-throughput compound screen in primary human HSC  
36 myofibroblasts and identified 19 small molecules that induce HSC inactivation, including the  
37 polyether ionophore nanchangmycin (NMC). NMC induces lipid re-accumulation while  
38 reducing collagen expression, deposition of collagen in the extracellular matrix, cell  
39 proliferation, and migration. We find that NMC increases cytosolic  $Ca^{2+}$  and reduces the  
40 phosphorylated protein levels of FYN, FAK, ERK1/2, HSP27 and STAT5B. Further, depletion  
41 of each of these kinases suppress *COL1A1* expression. These studies reveal a signaling  
42 network triggered by NMC to inactivate HSC myofibroblasts and reduce expression of  
43 proteins that compose the fibrotic scar. The identification of the antifibrotic effects of NMC  
44 and the pathways by which NMC inhibits fibrosis provides new tools and therapeutic targets  
45 to combat the development and progression of liver fibrosis.

46

## 47 Introduction

48

49 Chronic liver disease and cirrhosis are the 11th leading cause of mortality in the United States,  
50 accounting for over 40,000 deaths annually (Murphy et al., 2021). Liver injuries, including  
51 those caused by viral infection, excessive alcohol intake, and nonalcoholic steatohepatitis can  
52 lead to fibrosis, the accumulation of abnormal scar tissue, in the liver (Bataller & Brenner,  
53 2005). If left unchecked, liver fibrosis can progress to cirrhosis and end-stage liver disease  
54 (Bataller & Brenner, 2005). HSC myofibroblasts are the primary cell type responsible for liver  
55 fibrosis (Friedman et al., 1985; Mederacke et al., 2013). HSCs reside in the perisinusoidal  
56 space and represent 5-8% of total cells in the liver. In their quiescent, nonfibrotic state, they  
57 store vitamin A as retinol ester in lipid droplets (Geerts, 2001). In response to chronic liver  
58 injury, HSCs are activated and trans-differentiate into HSC myofibroblasts, characterized by  
59 the loss of lipid droplets, increased contractility, and secretion of ECM proteins, leading to  
60 fibrosis (Bataller & Brenner, 2005; Friedman, 2008).

61

62 Resolution of liver fibrosis has been observed when the source of liver injury is removed, such  
63 as in patients with successful antiviral therapy against hepatitis B or C (Benyon & Iredale,  
64 2000; Bonis et al., 2001; Falize et al., 2006). Two mechanisms can contribute to the reduction  
65 of activated HSC myofibroblasts during resolution of liver fibrosis – apoptosis of activated HSC  
66 myofibroblasts and reversion of HSC myofibroblasts to a more quiescent phenotype  
67 (Friedman, 2008). With regression of fibrosis, 40-50% of HSC myofibroblasts revert to an  
68 inactive state *in vivo*, which is associated with reduced collagen expression (Kisseleva et al.,  
69 2012; Troeger et al., 2012). These encouraging observations suggest that liver fibrosis is  
70 reversible and targeting HSC myofibroblasts to induce an inactive phenotype may serve as a  
71 therapeutic approach to treat patients with liver fibrosis.

72

73 Despite many efforts to understand HSC plasticity and target HSC myofibroblasts, there are  
74 currently no FDA-approved therapies directed at inhibiting the activity of HSC myofibroblasts.

75 In our previous studies, we developed a novel small molecule screen to identify compounds  
76 that promote HSC inactivation (Chen et al., 2017). In a pilot screen, this approach revealed  
77 the antifibrotic effects of tricyclic antidepressants (TCAs). In mechanistic studies, we identified  
78 that TCAs inhibit the enzyme acid ceramidase (aCDase). In subsequent studies, we  
79 demonstrated that inhibiting aCDase regulates YAP/TAZ-mediated HSC inactivation and  
80 reduces fibrogenesis in mouse models and in human precision cut liver slices (Alsamman et  
81 al., 2020).

82

83 Here, we expanded our screen approximately ten-fold to include 15,867 experimental wells  
84 and developed a secondary screen to evaluate primary hits. We find that nanchangmycin  
85 (NCMC), a polyether ionophore, promotes HSC inactivation. Furthermore, we demonstrate  
86 that NCMC decreases proliferation, migration, and assembly of collagen fibers in the  
87 extracellular matrix. In additional mechanistic studies, we show that multiple kinases and  
88 signaling pathways are involved in mediating the impact of NCMC on HSC activities, including  
89 the FYN, FAK and ERK pathways. Taken together, this study defines NCMC as a potent  
90 antifibrotic compound that inactivates HSC myofibroblasts and highlights the FYN, FAK and  
91 ERK pathways as potential downstream targets to inhibit liver fibrosis.

92

## 93 **Results**

94

95 *A high-throughput small molecule screen identifies compounds that inactivate human hepatic*  
96 *stellate cell myofibroblasts*

97

98 To identify small molecules that induce reversion of HSC myofibroblasts to an inactive  
99 phenotype, we screened 24 compound libraries consisting of 15,867 experimental wells using  
100 a high-throughput method to quantify lipid droplet accumulation as an indicator of HSC  
101 inactivation (Chen et al., 2017) (Figure 1A, Supplementary Table 1, and Supplementary Table  
102 2). Activated HSCs were seeded in 384-well plates, treated with compounds for 48 hours,

103 fixed, and stained with Bodipy, a fluorescent lipid dye, to analyze the accumulation of lipid  
104 droplets as a marker of HSC inactivation. DMSO and nortriptyline were included as negative  
105 and positive controls, respectively on each plate. A scaled value was calculated for each  
106 experimental well based on the average percentage of Bodipy-positive cells, toxicity, and  
107 reproducibility and was normalized according to negative and positive controls on the same  
108 plate to minimize plate-specific effects.

109

110 Experimental wells with a scaled value higher than 0.85, a cutoff set as the top 10th percentile  
111 of nortriptyline-treated wells on the same plate, were defined as hits. To avoid losing potential  
112 hits due to plate-specific effects, the top three experimental wells with the highest scaled  
113 values on each plate were also included as hits even if their scaled values did not meet the  
114 0.85 cutoff. A total of 711 experimental wells, containing 464 different compounds, met these  
115 criteria and were identified as primary hits (Figure 1B and Supplementary Table 3).

116

117 To further narrow the candidate list for secondary screening, the 711 hits were separated into  
118 102 clusters based on their chemical structure, with an average cluster size of seven  
119 compounds. The highest scoring hit with the most common structure within each cluster was  
120 selected as the representative compound for the cluster. Among the 102 representative  
121 compounds, ten compounds were removed because they contained pan assay interference  
122 structures (Baell & Nissink, 2018) or were themselves frequently identified as hits in screens.  
123 One compound was removed because it was a TCA, and we have previously demonstrated  
124 that TCAs target the sphingolipid pathway to inhibit HSC activity (Chen et al., 2017). One  
125 additional compound was removed because it had the same molecular formula as another  
126 selected hit (Supplementary Table 4). In addition to representative compounds selected from  
127 each cluster, 50 compounds with high scaled values or promising structures were also  
128 selected. In total, 140 unique compounds were included in the secondary screen (Figure 1A  
129 and Supplementary Table 5).

130

131 *Development of a secondary screening assay in primary human HSCs*

132

133 Activated HSCs are characterized by increased expression of  $\alpha$ -SMA (encoded by *ACTA2*)  
134 and type 1 collagen (encoded by *COL1A1*) (Bataller & Brenner, 2005; Friedman, 2008). We  
135 developed a high-throughput secondary assay to quantify *ACTA2* and *COL1A1* mRNA levels  
136 as indicators of HSC activity. HSCs were treated with compounds for 48 hours and then lysed  
137 for multiplexed qRT-PCR to quantify the house-keeping reference mRNA in the same well as  
138 *ACTA2* or *COL1A1*. Since a proper reference mRNA is critical for qRT-PCR based assays,  
139 we evaluated 18 housekeeping genes, consisting of seven commonly used genes as well as  
140 eleven reference genes identified from the literature (Eisenberg & Levanon, 2013). We first  
141 analyzed RNA sequencing data from HSCs under multiple conditions (Chen et al., 2017).  
142 Among these candidates, *GUSB*, *POLR2A*, *EMC7*, *VCP*, *PSMB2* and *VPS29* showed the  
143 lowest standard deviation (0.15 or less). Further comparison of expression of these genes in  
144 inactivated HSCs (induced by the addition of nortriptyline or ceramide (Chen et al., 2017)) and  
145 culture-activated HSCs revealed that *GUSB*, *POLR2A*, *EMC7* and *PSMB2* had the least fold  
146 change in expression (10% or less upon HSC inactivation). Thus, we selected these four  
147 reference mRNAs for further evaluation. *GAPDH*, which is used routinely as a reference  
148 control, was also included for comparison (Figure 1 – figure supplement 1A). We quantified  
149 expression using qRT-PCR in HSC cDNA samples reverse-transcribed from equal amounts  
150 of total RNA. *PSMB2*, which encodes proteasome 20S subunit beta 2, showed the least  
151 variation as indicated by standard deviation and was chosen as the reference mRNA for the  
152 secondary qRT-PCR-based screen (Figure 1 – figure supplement 1B).

153

154 qRT-PCR was performed to quantify *ACTA2*, *COL1A1* and *PSMB2* mRNA levels in each  
155 sample. Relative fold changes were calculated compared to DMSO control. We defined the  
156 following as criteria for compound advancement: 1. Fold change of *COL1A1* was reduced to  
157 less than 0.5 of DMSO control (FDR<0.05); 2. Fold change of *ACTA2* was reduced to less  
158 than 0.5 of DMSO (FDR<0.05); 3. Averaged *PSMB2* expression was between 0.2-2.0 of

159 DMSO (Figure 1C and Supplementary Table 5). This last criterion was added to avoid  
160 selecting compounds where large changes in *PSMB2* expression made it difficult to interpret  
161 changes in *ACTA2* and *COL1A1* expression. Of the 140 compounds, a total of 44 compounds  
162 met all three criteria. Five compounds were not commercially available, and 39 compounds  
163 were advanced for further analysis.

164

165 Next, we evaluated dose response curves (DRCs) for each compound at eight different  
166 concentrations, from 10 pM to 10  $\mu$ M, using a Bodipy lipid accumulation assay similar to that  
167 employed in the primary screen. Dose response curves were scored blindly by three  
168 researchers (Supplementary Table 6 and Methods), and nortriptyline served as a reference.  
169 Of the 39 compounds, 19 received an average score that was the same as or higher than  
170 nortriptyline controls (Figure 1D, Figure 1 – figure supplement 2, and Table 1).

171

172 Nine compounds had a DRC score less than 2 and an EC<sub>50</sub> less than 5  $\mu$ M and were  
173 considered the highest priority. Two subgroups of compounds were identified within this group  
174 based on similar bioactivity – histone deacetylase inhibitors (HDACIs), including trichostatin A  
175 and abexinostat, and Na/K-ATPase inhibitors, including ouabain, digitoxigenin, and digoxin.  
176 Histone deacetylases are linked to a variety of fibrotic disorders, including liver fibrosis (Pang  
177 & Zhuang, 2010). HDACIs, such as MC1568 and Valproate, have been reported to reduce  
178 HSC activation and alleviate liver fibrosis in animal models (Yoon et al., 2019). The presence  
179 of HDACIs in our final candidate list supports the validity of our screening approach in  
180 identifying potential liver fibrosis inhibitors. Na/K-ATPase activity may play a role in non-  
181 alcoholic fatty liver disease (Sodhi et al., 2017), but it is not clear how Na/K-ATPases regulate  
182 HSC activity and liver fibrosis. Due to the toxicity and narrow therapeutic dose range of cardiac  
183 glycosides, which limit their potential application in treatment of liver fibrosis, we decided not  
184 to pursue further evaluation of this group of compounds. Nanchangmycin (NCMC), a natural  
185 product of *Streptomyces nanchangensis*, is a polyether insecticidal antibiotic (Sun et al., 2002)  
186 and is one of the most potent hits. Studies of NCMC are limited, but it has been shown to have

187 a broad spectrum of antiviral activity against diverse arboviruses (Rausch et al., 2017) and  
188 potentially SARS-CoV-2 infection (Dittmar et al., 2020; Li et al., 2020; Svenningsen et al.,  
189 2020). It also suppresses breast cancer stem cell activity and inhibits growth of breast cancer  
190 and multiple myeloma cells (Huang et al., 2018; Xu et al., 2020). The cellular targets of NCMC  
191 remain largely unknown, and its effect on HSC activation and liver fibrosis has not been  
192 investigated. Therefore, we selected this compound to further validate its function in regulating  
193 HSC activity and explore its mechanism of action.

194

195 *Nanchangmycin induces lipid accumulation in both human and mouse primary HSCs*

196

197 First, we confirmed the effect of NCMC on lipid accumulation in primary HSCs isolated from  
198 four human donors of different age, gender and race (donor information provided in Materials  
199 and Methods). We observed that NCMC treatment significantly increased lipid droplet  
200 accumulation in primary HSC lines compared to controls (Figure 2A), consistent with HSC  
201 inactivation. Compared to nortriptyline (Chen et al., 2017), NCMC exhibited higher potency in  
202 HSCs from all four donors, where 100-300 nM of NCMC exhibited similar effects on lipid  
203 droplet accumulation to 10  $\mu$ M nortriptyline (Figure 2B and Figure 2 – figure supplement 1).  
204 As we switched to NCMC from a different source with higher purity, we found that the new  
205 NCMC stock has a lower EC<sub>50</sub> in HSCs from human donors and HSCs from C57BL/6 mice  
206 (Figure 2C-D and Figure 2 – figure supplement 2). These results show that NCMC induces  
207 lipid accumulation in both human and murine HSCs.

208

209 *NCMC inhibits fibrotic gene expression in HSCs*

210

211 We next quantified the effect of NCMC on *ACTA2* and *COL1A1* expression in multiple primary  
212 human HSC lines. NCMC treatment reduced both *ACTA2* and *COL1A1* levels at 100 nM or  
213 higher (Figures 3A-B). We also observed a dose-dependent effect of NCMC on *Acta2* and  
214 *Col1a1* expression in murine HSCs at day 2 (Figure 3C). To investigate how NCMC affects



215 the level of collagen deposited into the ECM, we performed the scar-in-a-jar assay to  
216 accelerate the process of ECM deposition with addition of molecular crowding reagents and  
217 TGF- $\beta$  (Chen et al., 2009; Good et al., 2019). NCMC treatment significantly decreased  
218 collagen staining intensity and fiber area (Figures 3D-E). In addition to two-dimensional (2D)  
219 cell culture models, we also tested NCMC's effect on *COL1A1* expression in spheroids  
220 consisting of primary human HSCs and primary rat hepatocytes. Both the basal expression of  
221 *COL1A1* and TGF- $\beta$ -induced *COL1A1* expression were significantly reduced by NCMC  
222 treatment (Figure 3F).

223

224 HSCs were next treated with NCMC and analyzed by RNA-sequencing analysis, which  
225 revealed that NCMC broadly affects genes associated with fibrosis. Among the top gene sets  
226 negatively enriched in the NCMC-treated group were ECM-related signatures, including ECM  
227 structural constituent and collagen-containing ECM, as well as signatures relevant to migration,  
228 including contractile fibers. Of note, genes associated with oligosaccharide lipid intermediate  
229 biosynthetic process were positively enriched, possibly contributing to the re-accumulation of  
230 lipid droplets (Figure 3G and Supplementary Table 7). We compared the RNA sequencing  
231 data with a canonical HSC gene signature (Zhang et al., 2016), an HSC-specific signature that  
232 is highly and uniquely expressed in HSCs and correlates with the extent of fibrosis (Zhang et  
233 al., 2016), and the liver cirrhosis signature from Disgenet database (Piñero et al., 2020). We  
234 observed that these signatures were significantly negatively enriched (Figure 3 – figure  
235 supplement 1 and Supplementary Table 8). Visualization of the canonical HSC gene signature  
236 (Zhang et al., 2016) also demonstrated that many genes that promote liver fibrosis, including  
237 those that encode collagens, TGF- $\beta$ , and PDGF pathway components, are inhibited by NCMC  
238 (Figure 3H and Supplementary Table 8). Taken together, these data suggest that NCMC  
239 triggers a global change in HSC gene expression, resulting in a decrease in profibrotic activity.

240

241 *NCMC reduces migration and proliferation of HSCs*

242

243 In addition to secretion of ECM proteins, activated HSCs demonstrate enhanced migration  
244 capabilities (Hernandez-Gea & Friedman, 2011). Thus, we performed transwell migration and  
245 scratch wound healing assays to evaluate how NCMC affects HSC migration. HSCs were pre-  
246 treated with NCMC for two days before seeding in cell culture inserts with permeable  
247 membranes. After 6-24 hours, HSCs that migrated through the membrane were stained and  
248 counted. NCMC treatment significantly reduced the number of cells that migrated through the  
249 membrane compared to DMSO controls (Figure 4A).

250

251 We also examined the wound healing capability of HSCs. HSCs were seeded onto plates  
252 containing inserts that block cells from accessing and attaching to a strip at the bottom of the  
253 well. After removal of the insert, DMSO or 1  $\mu$ M NCMC was added, and HSCs filled the gap  
254 or “wound” field through migration and proliferation. After 30 hours of treatment, the DMSO-  
255 treated control cells closed the gap, whereas the gap remained for NCMC-treated cells (Figure  
256 4B). While inhibition of HSC migration by NCMC is likely the major contributor to the difference  
257 observed between NCMC treatment and controls at shorter time points, such as 6 hours for  
258 the transwell assay, the difference at longer time points could be attributed to reductions in  
259 both migration and proliferation.

260

261 We next determined how NCMC affects HSC proliferation. We treated HSCs isolated from two  
262 human donors with DMSO control and increasing concentrations of NCMC and counted  
263 Hoechst-stained nuclei on five consecutive days. NCMC treatment reduced cell proliferation  
264 at concentrations of 25 nM and higher, and this effect on proliferation was first evident on day  
265 2 (Figure 4C). A fraction of HSCs undergo apoptosis with the removal of fibrotic stimuli *in vivo*  
266 (Kisseleva et al., 2012), and we evaluated the contribution of apoptosis to the effect of NCMC  
267 on day 2. Based on the analysis of Annexin V and propidium iodide (PI) by flow cytometry,  
268 NCMC treatment only showed a small increase in the percentage of apoptotic cells in one of  
269 two donor HSC lines at 1  $\mu$ M and no increase at 100nM. There was also a small increase in  
270 necrotic cells in NCMC treatment compared to controls (Figure 4D). In addition, analysis of

271 the proliferation marker Ki-67 and PI showed that NCMC treatment increased the percentage  
272 of G0 quiescent cells (Figure 4E and Figure 4 – figure supplement 1). Taken together, these  
273 results suggest that HSCs enter a more quiescent-like, non-proliferative state upon NCMC  
274 treatment, and apoptosis was only observed in a small fraction of cells.

275

276 *Modulation of Ca<sup>2+</sup> signaling may contribute to the effect of NCMC on HSC inactivation*

277

278 NCMC is a polyether ionophore and has been shown to increase cytosolic Ca<sup>2+</sup> in a cancer  
279 cell line (Huang et al., 2018). We examined the activity of NCMC as a calcium ionophore in  
280 HSCs. We loaded HSCs with a fluorescent Ca<sup>2+</sup> indicator (Fluo-4 NW) and treated cells with  
281 NCMC. Ionomycin and thapsigargin were included as positive controls (Jones & Sharpe, 1994;  
282 Morgan & Jacob, 1994). At 10 μM, NCMC increased cytosolic Ca<sup>2+</sup> as did ionomycin and  
283 thapsigargin (Figure 4F). We also performed the same analysis with ethylene glycol tetraacetic  
284 acid (EGTA) to chelate Ca<sup>2+</sup> and eliminate any contribution from extracellular Ca<sup>2+</sup> during the  
285 assay. Similar to the effect observed with thapsigargin (Ribeiro et al., 2018), the increase of  
286 cytosolic Ca<sup>2+</sup> in response to NCMC was not sensitive to EGTA (Figure 4 – figure supplement  
287 2A), suggesting that the immediate increase of cytosolic Ca<sup>2+</sup> following NCMC treatment is  
288 due to release of calcium from intracellular stores. Analysis of a dose response of NCMC  
289 demonstrated an increase in cytosolic Ca<sup>2+</sup> at concentrations as low as 10 nM (Figure 4G and  
290 Figure 4 - figure supplement 2B).

291

292 *NCMC reduces COL1A1 expression in HSCs through the FYN pathway*

293

294 Calcium signaling regulates mitogen-activated protein kinases and non-receptor tyrosine  
295 kinases (Filvaroff et al., 1990; Rusanescu et al., 1995; Xia et al., 1996), and we analyzed a  
296 kinase array to define kinase signaling molecules modulated by NCMC. HSCs were treated  
297 with DMSO or 1 μM NCMC for 1 and 18 hours (Figure 5A). Among the 45 proteins tested,  
298 FYN phosphorylation at Y420 was reduced by approximately 40% at both 1 hour and 18 hours.

299 We selected HSP27 (HSPB1), ERK1/2 (MAPK3/1), STAT5A/B, and FAK (PTK2) to study  
300 further in addition to FYN because 1) they also showed decreased phosphorylation at 18 hours,  
301 and 2) genes encoding these products are expressed at a relatively high level in HSCs, as  
302 indicated from RNA sequencing data, suggesting that these may also be potential mechanistic  
303 targets of NCMC in HSCs.

304

305 To further investigate the role of these seven kinases in human HSCs, we depleted each  
306 kinase using pooled siRNAs in human HSCs from three donors. We observed a consistent  
307 reduction of *COL1A1* with depletion of *FYN*, *HSP27*, *ERK1*, *ERK2* and *STAT5B* (Figures 5B-  
308 C, Figure 5 – figure supplement 1), suggesting that each kinase contributes to regulation of  
309 *COL1A1* expression.

310

311 Among the kinases that consistently reduced *COL1A1* expression, the reduction of FYN  
312 phosphorylation at Y420 was the most prominent following one hour of NCMC treatment,  
313 indicating that FYN may mediate the immediate response to NCMC in HSCs. Therefore, we  
314 further investigated FYN activity. Western blot of FYN revealed two bands -- the upper band  
315 was reduced in HSCs treated with NCMC, while the lower band showed little change (Figure  
316 6 – figure supplement 1A). Both bands were reduced with depletion of FYN (Figure 6 – figure  
317 supplement 2), suggesting that both products are encoded by *FYN* mRNA. FYN  
318 phosphorylation was not directly evaluated because antibodies that uniquely recognize  
319 phosphorylated FYN are not available. We also probed with a phospho-Src family antibody,  
320 which recognizes phosphorylated FYN and other Src family proteins (Figure 6 – figure  
321 supplement 1B). Two bands of approximately the same size are observed with FYN antibody  
322 and pSrc antibody, suggesting that both bands may represent phosphorylated FYN, while it is  
323 the product in the upper band that is affected by NCMC treatment. qPCR analysis of NCMC-  
324 treated HSCs showed that *FYN* mRNA level was not affected (Figure 6 – figure supplement  
325 3), further indicating that NCMC regulates FYN through a post transcriptional mechanism.

326

327 Both depletion of FYN using two different siRNA duplexes (Figure 6A-B) and treatment with  
328 1-Naphthyl PP1, an inhibitor of v-Src, FYN, and ABL (Figure 6C), significantly reduced  
329 *COL1A1* mRNA level in HSCs. Collagen deposition in the ECM was also impaired by FYN  
330 depletion, as indicated by the reduced collagen intensity and fiber area in the scar-in-a-jar  
331 assay (Figures 6D). In addition, ectopic expression of a dominant negative Y213A FYN mutant  
332 (Kaspar & Jaiswal, 2011) reduced *COL1A1* expression in HSCs but did not further decrease  
333 *COL1A1* level in NCMC-treated cells, suggesting that FYN inhibition is likely to be downstream  
334 of NCMC (Figure 6E). Lastly, expression of dominant negative FYN in HSCs resulted in a  
335 decrease in phosphorylated ERK (Figure 6F), suggesting that FYN may crosstalk with the  
336 ERK pathway to exert its function.

337

### 338 *ERK1/2 and FAK regulate HSC migration*

339

340 Next, we asked if FYN regulates other HSC phenotypes that are observed with NCMC  
341 treatment. HSCs were transfected with pooled FYN siRNAs, and after 3 days, cells were  
342 seeded for transwell migration assay. As FAK is known to regulate migration of lung fibroblasts  
343 (Zhao et al., 2016) and HSCs (Zhao et al., 2017), we included FAK siRNAs as a positive  
344 control. While FAK depletion consistently suppressed migration of HSCs isolated from three  
345 different human donors, FYN depletion only reduced migration in one HSC line (Figure 7A-B).  
346 We also observed that dominant negative FYN promotes phosphorylation of FAK (Figure 6F),  
347 while NCMC reduces phosphorylation of FAK (Figure 6 – figure supplement 4), suggesting  
348 that NCMC controls FAK phosphorylation and HSC migration through a pathway that is  
349 independent of FYN.

350

351 We further tested how other kinases affected by NCMC (ERK1/2 and HSP27) regulate HSC  
352 migration. Depletion of ERK1/2 consistently reduced migration across different donors,  
353 whereas the influence of HSP27 depletion varied across HSCs from different donors (Figure

354 7C). These data indicate that NCMC regulates HSC migration through multiple downstream  
355 signaling pathways likely targeting FAK and ERK1/2 as the primary paths to inhibit migration.

356

## 357 **Discussion**

358

359 Liver fibrosis is the major driver of liver failure in all etiologies of chronic liver disease, and the  
360 degree of fibrosis is the strongest predictive factor for liver-related mortality (Anstee et al.,  
361 2019). Current therapies for liver fibrosis focus on eliminating the underlying etiology. However,  
362 there is a lack of effective treatment for several chronic liver diseases, such as non-alcoholic  
363 fatty liver disease, which affects one in four people worldwide (Younossi et al., 2016), and  
364 primary sclerosing cholangitis (Karlsen et al., 2017). Therefore, there is an urgent need to  
365 develop antifibrotic therapies. Activation of HSCs in the setting of chronic liver injury  
366 represents a critical event in fibrosis, as activated HSC myofibroblasts are the primary source  
367 of collagen production and excessive extracellular matrix deposition (Friedman et al., 1985;  
368 Maher & McGuire, 1990; Mederacke et al., 2013). With evidence that the scarring process in  
369 the liver is reversible (Sun et al., 2020) and that HSC myofibroblasts demonstrate plasticity  
370 and can revert to an inactive state (Kisseleva et al., 2012; Troeger et al., 2012), there is  
371 increasing enthusiasm for development of approaches to promote HSC inactivation as a  
372 therapeutic strategy to treat liver fibrosis. Although some therapies under investigation in  
373 clinical trials, including PPAR agonists and TGF- $\beta$  inhibitors, are anticipated to promote HSC  
374 inactivation, none have yet been recognized as effective antifibrotic agents (Guo & Lu, 2020).

375

376 Therefore, with the goal to identify new antifibrotic compounds and novel pharmacological  
377 targets for the treatment of liver fibrosis, we performed a small molecule compound screen  
378 using primary human HSC myofibroblasts. Combining high-content microscopy imaging and  
379 high-throughput qPCR screening approaches as well as filtering methods that take into  
380 consideration both the potency and diversity of the candidates' chemical structures, we  
381 screened 15,867 experimental wells and identified 19 candidates. Further studies to

382 investigate the compounds identified by the screen will deepen our understanding of HSC  
383 biology and allow identification of additional genes and pathways that could be targeted to  
384 reduce liver fibrosis.

385

386 We focused on NCMC because it strongly induced HSC inactivation, and the activity of NCMC  
387 was poorly understood. NCMC belongs to a group of naturally occurring polyether ionophores,  
388 which consist of over 120 known members (Huang et al., 2018). Among them, the compound  
389 monensin shares a similar chemical structure to NCMC and is also a positive hit in our primary  
390 screen. It was grouped in the same chemical cluster as NCMC, but NCMC was selected as  
391 the representative compound for this cluster in the screen because NCMC had a higher scaled  
392 value (Supplementary Table 4). This group of compounds demonstrates antibacterial,  
393 antifungal, antiparasitic, antimalarial, antiviral, anti-inflammatory activities and cytotoxicity in  
394 cancer cells (Kevin li et al., 2009). Although some polyether ionophores have been employed  
395 as veterinary antibiotics, none have been used as antibiotics in human, possibly due to  
396 concerns about toxicity (Huczyński, 2012). Indeed, we observe that NCMC demonstrated  
397 substantial cytotoxicity in cell culture at concentrations higher than 10  $\mu$ M (Figure 2 – figure  
398 supplement 1). However, given that the EC<sub>50</sub> of NCMC in lipid accumulation assay is in the  
399 range of 10-300 nM without inducing apoptosis, NCMC or compounds with similar structure  
400 may have potential as antifibrotic therapy within optimized therapeutic doses.

401

402 Despite the extensive study of some polyether ionophores, limited data are available  
403 describing the activity and mechanism of action of NCMC in mammalian cells. A screen for  
404 bioactive inhibitors of the Otub1/c-Maf axis in multiple myeloma cells demonstrated that NCMC  
405 induces c-Maf polyubiquitination and proteasomal degradation in the presence of Otub1 (Xu  
406 et al., 2020). A-130-A, a close analog of NCMC, also inhibited the Wnt/ $\beta$ -catenin pathway and  
407 induced autophagy, and both A-130-A and NCMC increased cytosolic Ca<sup>2+</sup> and reactive  
408 oxygen species (ROS) as well as enhanced the permeability of the mitochondrial inner  
409 membrane to H<sup>+</sup> and K<sup>+</sup> (Huang et al., 2018). To examine a wide variety of signaling pathways

410 that may be affected downstream of NCMC, we performed a phospho-kinase array analysis  
411 to measure the phosphorylation of 37 kinases at a total of 43 different sites and the total protein  
412 expression of  $\beta$ -catenin and HSP60. Seven kinases, including FYN, HSP27, ERK1, ERK2,  
413 STAT5A, STAT5B, and FAK, were selected and further tested because their phosphorylated  
414 protein was reduced by NCMC treatment, and all were relatively abundant in HSCs. When  
415 depleted individually in HSCs from multiple donors, most of these kinases reduced *COL1A1*  
416 level consistently (Figure 5B), suggesting that each may play a role in mediating NCMC's  
417 effect on collagen expression. It is unclear why STAT5A siRNAs, which effectively depleted  
418 *STAT5A* but also reduced *STAT5B* mRNA level, did not significantly affect *COL1A1*  
419 expression, considering that reduction of *STAT5B* alone to a similar level by STAT5B siRNAs  
420 did demonstrate an inhibitory effect (Figure 5B-C and Figure 5 – figure supplement 1). It is  
421 possible that the expression of STAT5B protein is inhibited more efficiently in HSCs  
422 transfected with STAT5B siRNAs than those transfected with STAT5A siRNAs despite the  
423 similar mRNA levels. STAT5A/B homo- and hetero-dimers could have different individual  
424 DNA-binding specificities (Maurer et al., 2019), and the ratio of homo- to hetero-dimers could  
425 also affect transcription of the *COL1A1* gene.

426

427 Our investigations of FYN revealed that depletion or inhibition of FYN activity suppresses  
428 collagen expression in primary human HSCs and deposition of collagen in the ECM, but  
429 regulation via FYN did not explain all the effects observed with NCMC. The regulation of  
430 collagen expression by FYN is in agreement with a recent study demonstrating that FYN  
431 depletion and inhibition in the presence of TGF- $\beta$  reduces collagen I expression in  
432 immortalized human and rat HSC lines (Du et al., 2020). This study also observed that FYN  
433 depletion and inhibition in the presence of TGF- $\beta$  reduced HSC migration (Du et al., 2020),  
434 however, our data did not show a consistent effect on migration with depletion of FYN. As cell  
435 migration is controlled by a complex signaling network, the difference in the basal activity of  
436 the signaling pathways up- or down-stream of FYN may account for the observed differences.  
437 In contrast, FAK and ERK1/2 depletion showed a more robust and consistent inhibitory effect



438 among all HSC lines tested, suggesting that these kinases may serve as the critical nodes  
439 regulating HSC migration. Depletion or inhibition of FYN or ERK suppresses HSC proliferation  
440 (Du et al., 2020; Pagès et al., 1993), and FAK regulates proliferation in many cell types (Zhou  
441 et al., 2019). Thus, it is likely that modulation of multiple kinases contributes to the anti-fibrotic  
442 effect of NCMC, although the involvement of each kinase may vary depending on the cellular  
443 context.

444

445 We found that NCMC increases cytosolic  $Ca^{2+}$ . Although it has not been demonstrated  
446 experimentally, it is suspected that NCMC may increase cytosolic  $Ca^{2+}$  levels by disrupting  
447  $Na^+/Ca^{2+}$  exchange (Huang et al., 2018). Of note, the  $Na^+/K^+$ -ATPase inhibitors identified in  
448 our screen can also increase cytosolic  $Ca^{2+}$  levels (Tian & Xie, 2008), and increased cytosolic  
449  $Ca^{2+}$  has been observed to inhibit ERK1/2 in fibroblasts (Bosch et al., 1998; Chuderland et al.,  
450 2020; Cook et al., 1997). As a ubiquitous second messenger with wide-ranging physiological  
451 roles, cytosolic  $Ca^{2+}$  levels may be a key factor mediating the downstream anti-fibrotic activity  
452 of NCMC, but further investigations are needed to unravel the complete signaling cascade.

453

454 In summary, this study has identified NCMC as an antifibrotic compound that increases  
455 cytosolic  $Ca^{2+}$  and regulates multiple kinases, including FYN, FAK and ERK1/2 to drive the  
456 inactivation of HSC myofibroblasts (Figure 7C). Targeting an individual component of this  
457 complex network may suppress certain cellular activities and contribute to HSC inactivation,  
458 but it may be necessary to synergistically manipulate multiple targets to achieve antifibrotic  
459 effects among the general population. By regulating multiple signaling pathways, NCMC  
460 confers a more robust impact than observed with inhibition of only one pathway and thus could  
461 represent a more effective strategy to halt fibrosis progression.

462

## 463 **Materials and Methods**

464

465 *Cell culture and compound*

466

467 Human primary hepatic stellate cells from donors 1, 2 and 5 were isolated from human  
468 nonparenchymal liver cells (NPCs) purchased from Lonza (cat# HUCNP) as described  
469 previously (Chen et al., 2017). Human primary hepatic stellate cells from donors 3 and 4 were  
470 purchased as isolated hepatic stellate cells from Lonza (cat# HUCLS). Donor information is  
471 listed below.

| Donor | Lonza ID | Age | Gender | Race             | BMI  |
|-------|----------|-----|--------|------------------|------|
| 1     | 4105     | 45  | M      | Caucasian        | 24.2 |
| 2     | 4270     | 35  | M      | Caucasian        | 42.1 |
| 3     | 180761   | 57  | F      | Caucasian        | 23.6 |
| 4     | 182821   | 24  | F      | African American | 48.8 |
| 5     | 4258     | 51  | M      | African American | 24.5 |

472

473 All hepatic stellate cells were cultured in Dulbecco's Modified Eagle Medium (DMEM) with 10%  
474 fetal calf serum (FCS) and 1% Penicillin/Streptomycin (P/S). The primary lipid accumulation  
475 screen and secondary mRNA screen were conducted with HSCs from donor 1 at passage 8,  
476 the dose response curve screen was conducted with HSCs from donor 2 at passage 8 or 9,  
477 and all other experiments were conducted with HSCs from donors as indicated at passage 8-  
478 10.

479

480 Nanchangmycin (NCCM) was purchased from two sources. The initial confirmation of dose  
481 response curves in multiple HSC lines (Figure 2B and Figure 2 – figure supplement 1) were  
482 performed with NCCM purchased from Selleck Chemicals (cat# S1450). All other experiments  
483 were performed with NCCM purchased from Adooq (cat# A10621) for higher purity. 1-  
484 Naphthyl PP1 was purchased from Tocris (cat# 3063). Thapsigargin (Sigma-Aldrich, cat#

485 T9033) and ionomycin (Biogems, cat# 5608212) was purchased from Sigma. Stock solutions  
486 were made with DMSO.

487

488 *Primary high-throughput lipid accumulation screen*

489

490 For each of the 5-day screening cycle, cells were plated on day 1 at 1000 cells/well in 30  
491  $\mu$ l/well of complete media in 384-well plates using Multidrop Combi (Thermo). On day 3, 100  
492 nL/well of compounds from the libraries were transferred by a stainless-steel pin array and  
493 Seiko compound transfer robot to the assay plates in duplicates. On day 5, the cells were fixed  
494 with 4% paraformaldehyde (diluted with DPBS from 16% stock, Electron Microscopy Sciences,  
495 cat# 15710) and incubated at room temperature for 15 min. The cells were washed one time  
496 with DPBS and incubated with Bodipy 493/503 (0.25  $\mu$ g/mL, Invitrogen, cat# D3922) and  
497 Hoechst (5  $\mu$ g/mL, Invitrogen, cat# H1399) for 45 min at room temperature. The plates were  
498 washed three times with DPBS, and then 50  $\mu$ l/well DPBS was added before sealing the plates  
499 with adhesive foil cover. The plates were imaged using the ImageXpress Micro Confocal  
500 (Molecular Devices) at the Institute of Chemistry and Cell Biology (ICCB)-Longwood screening  
501 facility. Images of each well were analyzed using MetaXpress software to calculate the  
502 percentage of positive cells (the total number of Bodipy positive cells (cutoff was adjusted for  
503 each plate) divided by the total cell count).

504

505 We developed a scoring system to rank the strength of a compound in inducing HSC reversion  
506 to the inactive phenotype. A score was calculated as follows: 1. Averaged percent positive  
507 cells from duplicates was used to calculate the distance from the baseline of the plate  
508 (percentile 75%), 2. Toxicity was penalized (the distance from the average number of cells in  
509 the compound wells to the number of cells in the nortriptyline wells), and 3. Poor reproducibility  
510 was penalized (the error of the two points to the average value of the duplicates). The score  
511 was then normalized using nortriptyline and DMSO scores for each plate. A new parameter

512 was calculated termed “Scaled” with the formula:  $\text{Scaled} = -1 * (\text{median (nortriptyline)-}$   
513  $\text{score}) / \text{abs}(\text{median (nortriptyline)-median(DMSO)})$  .

514

#### 515 *Consolidation of screening library*

516

517 Chemical structures of the screening library were consolidated using the data science  
518 workflow software BIOVIA Pipeline Pilot. Protonation states of the structures were  
519 standardized, and counter ions were eliminated. We used canonical Simplified Molecular Input  
520 Line Entry System (SMILES) as a unique linear textual representation of the chemical  
521 structure. This way, the initial 15867 structures could be mapped onto 7696 unique canonical  
522 SMILES of which 4329 are represented by a single well in the library and 3367 occur in up to  
523 19 wells. Multiple occurrences of individual canonical SMILES could be traced to multiple  
524 vendors and/or multiple molar concentrations of the individual probes. Using this analysis, the  
525 711 experimental wells defined as hits were determined to represent 464 individual  
526 compounds.

527

#### 528 *Clustering analysis of primary screen candidates and selection for secondary analysis*

529

530 Hits were clustered into 102 groups of structurally similar compounds based on Tanimoto  
531 similarities using the computational analysis software BIOVIA Pipeline Pilot. The distance to  
532 the center of the cluster was calculated for each compound in the cluster using BIOVIA  
533 Pipeline Pilot, and the most common structure for each cluster was defined based on this  
534 value. The strongest hit with the most common structure for each cluster was selected as the  
535 representative for the cluster. Promiscuous bioactive compounds that contain pan assay  
536 interference structures (PAINS) (Baell & Nissink, 2018), or that we identified as frequent hits  
537 in screens at ICCB-L were not included for further analysis, as the exhibited bioactivity may  
538 be attributed to interference with specific assay readouts and/or nonspecific, intractable  
539 mechanism of action (Matlock et al., 2018). Frequent hits were defined as having a positive

540 hit rate of more than 20% in screens performed at ICCB-L or more than 10 total positive hits  
541 in the database of ICCB-L screens. One additional compound was removed because the  
542 molecular formula was the same as another selected compound, and one compound was  
543 removed due to similarity in structure to nortriptyline (Supplementary Table 4).

544

545 *Secondary mRNA screen for cherrypicked small molecules*

546

547 For each of the 5-day screening cycle, cells were plated in 384-well plates as in primary screen  
548 on day 1. Compounds were added on day 3 using a digital non-contact dispenser D300e  
549 (Hewlett Packard) in quadruplicate. On day 5, cell lysates for qPCR were prepared using the  
550 Cells-to-C<sub>T</sub> 1-Step Taqman Kit (Invitrogen, cat# A25603) according to manufacturer's  
551 instructions. Briefly, cells were incubated with 25  $\mu$ L/well lysis buffer (plus DNase) for 5  
552 minutes at room temperature, and the reaction was stopped by adding 2.5  $\mu$ L stop solution  
553 and incubating for 2 minutes at room temperature. 2  $\mu$ L cell lysates were used in the  
554 multiplexed qRT-PCRs to measure *ACTA2*, *COL1A1*, and *PSMB2* mRNA levels. To reduce  
555 technical variations, the TaqMan probe for endogenous control gene *PSMB2* was VIC-labeled  
556 and primer-limited, so that the *PSMB2* probe can be multiplexed with FAM-labeled probe for  
557 *ACTA2* or *COL1A1* in the same qRT-PCR. Details for probes are included in the "qPCR  
558 analysis" section. The results were analyzed by fitting the data to the following linear models:  
559  $Ct\_ACTA2 \sim Ct\_PSMB2 + plate + chemical$  or  $Ct\_COL1A1 \sim Ct\_PSMB2 + plate + chemical$ .  
560 Relative fold changes were calculated from the estimate of each chemical as compared to  
561 DMSO control.

562

563 *Dose response curve screen*

564

565 The dose response curve screen was performed using an adapted lipid accumulation assay  
566 with live human primary HSCs. Briefly, cells were plated at a density of 2500 cells/well in 384-  
567 well plates. After 24 hours, compounds were added in duplicate at concentrations from 0.001

568 to 10  $\mu\text{M}$ . Nortriptyline (10  $\mu\text{M}$ ) and DMSO (0.1%) served as controls. Cells were incubated  
569 with compounds for 24 hours, followed by treatment with Bodipy (1  $\mu\text{g}/\text{ml}$ ; ThermoFisher, cat#  
570 D3922) and NuLight Rapid Red (final dilution 1:4000; Essen BioSciences, cat# 4725) for an  
571 additional 12 hours to stain lipid droplets and nuclei. Fluorescent signals were measured using  
572 an Incucyte S3 system.

573

574 Bodipy stained area and nuclei count were determined selecting two fields per well. The  
575 Bodipy-stained area per nuclei count was calculated per field and the mean was determined.  
576 The percentage of lipid accumulation (referred to as % CTL) in response to compound  
577 treatment was analyzed as follows:  $100 \times ((\text{total green area}/\text{count} [\text{test compound}] - \text{total}$   
578  $\text{green area}/\text{count} [\text{mean DMSO}]) / (\text{total green area}/\text{count} [\text{mean Nor}] - \text{total green area}/\text{count}$   
579  $[\text{mean DMSO}]))$ . The total green area is a measure of lipid droplet accumulation in  $\mu\text{m}^2/\text{well}$ ,  
580 and count indicates the cell (nuclei) number per well.

581

582 The dose-response measurements were reviewed and scored independently by three  
583 researchers based on the following criteria: Priority 1: the percentage of lipid accumulation (%  
584 CTL) is increased at 1  $\mu\text{M}$ , the shape suggests a sigmoidal distribution, and at least two  
585 concentrations show increased Bodipy staining before the compound becomes toxic; Priority  
586 2: compound treatment at 3.03  $\mu\text{M}$  and 10  $\mu\text{M}$  (highest concentrations) shows increased  
587 Bodipy staining, and % CTL is at least 70% at 10  $\mu\text{M}$ ; Priority 3: compound treatment at 3.03  
588  $\mu\text{M}$  and 10  $\mu\text{M}$  (highest concentrations) shows increased Bodipy staining, and % CTL is less  
589 than 70% at 10  $\mu\text{M}$ ; Priority 4: only treatment at the highest concentration (10  $\mu\text{M}$ ) shows  
590 increased Bodipy staining ; Priority 5: the curve is almost flat (no response).

591

592 *Estimation of EC50 for NCMC*

593

594 HSCs were plated in 384-well plates (Figure 2B) or 96-well plates (Figures 2C-D and Figure  
595 2 – figure supplement 2), treated with NCMC at indicated concentrations for time points as

596 specified, and analyzed by lipid accumulation assay similar to the primary screen. Once the  
597 percentage of Bodipy-positive cells was determined, the data were fitted into a sigmoidal four  
598 parameter logistic model in Graphpad Prism software to estimate the EC50 of NCMC under  
599 each condition.

600

#### 601 *Fluorescent microscopy*

602

603 HSCs were seeded in black-wall 96-well plates (Corning, cat# 3603) and treated with NCMC  
604 at different concentrations as indicated. After 48 hours, plates were fixed with 4%  
605 paraformaldehyde and stained with Bodipy and Hoechst as in the primary lipid accumulation  
606 screen. After the last wash, 200  $\mu$ l/well DPBS was added, and plates were imaged using a  
607 Nikon A1R confocal microscope.

608

#### 609 *qPCR analysis*

610

611 qPCR analysis related to depletion of kinase candidates was performed using lysates  
612 prepared with the Cells-to-C<sub>T</sub> 1-Step Taqman Kit similar to the secondary mRNA screen,  
613 except that HSCs were seeded in 96-well plates and 50  $\mu$ l lysis buffer (with DNase) and 5  $\mu$ l  
614 stop solution were used. For the other qPCR analyses, RNA samples were prepared using  
615 TRIzol (Invitrogen, cat# 15596026), and the concentrations were quantified using Qubit 3  
616 fluorometer (Invitrogen) and the Qubit RNA BR Assay Kit (Invitrogen, cat# Q10211) according  
617 to manufacturer's instructions. Reverse transcription was performed using iScript gDNA Clear  
618 cDNA Synthesis Kit (BIO-RAD, cat# 1725035) with 1  $\mu$ g total RNA input, and quantitative real-  
619 time PCR was performed using TaqMan Universal PCR Master Mix (Applied Biosystems, cat#  
620 4305719) and TaqMan Real-time PCR Assays for specific genes listed below.

Assay ID

|                          |               |
|--------------------------|---------------|
| Human <i>ACTA2</i>       | Hs00426835_g1 |
| Human <i>COL1A1</i>      | Hs00164004_m1 |
| Human <i>FYN</i>         | Hs00176628_m1 |
| Human <i>HSPB1/HSP27</i> | Hs00356629_g1 |
| Human <i>MAPK1/ERK2</i>  | Hs01046830_m1 |
| Human <i>MAPK3/ERK1</i>  | Hs00385075_m1 |
| Human <i>PSMB2</i>       | Hs01002946_m1 |
| Human <i>PTK2/FAK</i>    | Hs01056457_m1 |
| Human <i>STAT5A</i>      | Hs00559643_m1 |
| Human <i>STAT5B</i>      | Hs00560026_m1 |
| Mouse <i>Acta2</i>       | Mm00725412_s1 |
| Mouse <i>Col1a1</i>      | Mm00801666_g1 |
| Mouse <i>Psmb2</i>       | Mm00449477_m1 |

621

622 *Scar-in-a-jar (Siaj) assay*

623

624 To test the effect of NCMC on collagen deposition in ECM, HSCs were seeded in black-wall  
625 96-well plates (Corning, cat# 3603) and treated with DMSO or 100 nM NCMC for 48 hours in  
626 Ficoll medium, i.e. complete medium supplemented with 50 µg/ml L-ascorbic acid 2-  
627 phosphate sesquimagnesium salt hydrate (Sigma, cat# A8960), 37.5 mg/ml Ficoll-PM70  
628 (Sigma, cat# F2878), 25 mg/ml Ficoll-PM400 (Sigma, cat# F4375) and 5 ng/mL TGF-β (R&D  
629 Systems, cat# 240-B-002). To test the effect of *FYN* depletion on collagen deposition, HSCs



630 were reverse transfected in 96-well plates with 50 nM non-targeting control siRNA or siRNAs  
631 against *FYN* (see the “RNAi-mediated depletion of genes” section for specific information on  
632 siRNAs and transfection reagents). After 48 hours, cells were incubated with FicolI medium  
633 for an additional 48 hours.

634

635 Cells were then fixed with ice-cold methanol for 2 min on ice, washed one time with DPBS and  
636 then incubated with primary antibody against collagen type I in DPBS (1:1000, Sigma, cat#  
637 C2456) at 4 °C overnight. After three washes with PBS-Tween (0.05% v/v), cells were  
638 incubated with donkey anti-mouse Alexa Fluor 488 secondary antibody (1:500, Invitrogen,  
639 cat# A-21202) and Hoechst (1:4000) in DPBS at room temperature for 1 hour. Plates were  
640 washed three times with PBS-Tween, and after the final wash, 200  $\mu$ L/well of DPBS was  
641 added. Plates were imaged using the ImageXpress Micro Confocal microscope (Molecular  
642 Devices) with 10x Plan Apo lens, and collagen fibers were analyzed using a custom module  
643 built within the MetaXpress software.

644

#### 645 *Liver spheroid experiment*

646

647 Liver spheroids were prepared as previously described (Leite et al., 2016) except spheroids  
648 were formed from primary rat hepatocytes (Lonza, cat# RSCP01) and primary human HSCs.  
649 Cells were seeded in ultra-low attachment round bottom 96-well plates (Greiner Bio-One, cat#  
650 650970) at a ratio of 1:2. The cells were incubated in HCM hepatocyte culture media (Lonza,  
651 cat# CC-3198) for one day with orbital shaking to allow the generation of liver spheroids. The  
652 spheroids were then treated with DMSO or NCMC for 72 hours with or without TGF- $\beta$  (5  
653 ng/mL). Spheroids were collected, and RNA was extracted to quantify expression of human  
654 *COL1A1* and *ACTA2* expression through qPCR.

655

#### 656 *RNA sequencing*

657

658 HSCs were treated with DMSO or 1  $\mu$ M NCMC for 48 hours. RNA was extracted using RNeasy  
659 Mini kit (Qiagen, cat# 74104), followed by quality assessment via Agilent 2200 Tape Station.  
660 Two biological samples were prepared for DMSO treatment and three biological samples were  
661 prepared for NCMC treatment, and all samples had an RNA integrity number (RIN) greater  
662 than 9. RNA library was prepared using TruSeq Stranded mRNA Library Prep Kit (Illumina,  
663 cat# 20020594) and sequenced on a HiSeq2000.

664  
665 For data analysis, reads were quality assessed using the FASTQC (v 0.11.8) and aligned to  
666 the human reference genome (GRCh38\_release\_37) from GENCODE with Star aligner  
667 (v2.7.3) using RSEM (v1.3.1) with default parameters. First, the human reference genome  
668 was indexed using the GENCODE annotations (gencode.v37) with rsem-prepare-reference  
669 from RSEM software. Next, rsem-calculate-expression was used to align the reads and  
670 quantify the gene abundance. The output of rsem-calculate-expression gives separately the  
671 read count and transcripts per million (TPM) value for each gene.

672

### 673 *Differential expression analysis*

674

675 Differential expression analysis was performed using gene read counts with DESeq2 package  
676 (v 1.32.0) to produce LFC values and corresponding p-values (FDR) applying a Benjamini–  
677 Hochberg correction for multiple testing. The heatmap was created using normalized gene  
678 count values from Deseq2, using R gplots package heatmap.2 function with row scaling.

679

### 680 *Gene set enrichment analysis (GSEA)*

681

682 Gene set enrichment analysis was performed using the GSEA software downloaded from  
683 <http://www.gsea-msigdb.org/gsea/index.jsp> (Mootha et al., 2003; Subramanian et al., 2005).

684 An expression dataset containing gene name and log<sub>2</sub> (fold change) was generated based on  
685 the RNA sequencing results and loaded to the software as the input file. The c5.all.v7.4 gene

686 matrix was used as the database of gene sets, and gene sets smaller than 10 or larger than  
687 1000 in size were excluded for the analysis. The canonical HSC gene signature and specific  
688 HSC gene signature were obtained from previous publication (Zhang et al., 2016), and the  
689 liver cirrhosis signature was downloaded from Disgenet database (Piñero et al., 2020). Among  
690 the 44 genes in the canonical HSC signature, 35 were found in our differential expression list.  
691 Among the 122 genes in the specific HSC signature, 97 were found in our differential  
692 expression list. Among the 103 genes in the liver cirrhosis signature, 69 were found in our  
693 differential expression list. These genes were listed in Supplementary Table 8.

694

#### 695 *Transwell migration assay*

696

697 HSCs were treated with DMSO or 1  $\mu$ M NCMC for 48 hours or transfected with siRNAs for 72  
698 hours in 6-well plates. HSCs were then trypsinized and counted to seed at 5,000-10,000 cells  
699 per insert depending on donor and assay duration (Corning, cat# CLS3422) in serum-free  
700 DMEM. Complete medium (with 10% FBS) was added to the bottom well to induce cell  
701 migration through the pores (diameter: 8  $\mu$ m) of the membrane at the bottom of the insert.  
702 After the indicated assay time, cells were fixed with 4% paraformaldehyde at room  
703 temperature for 15 min and stained with crystal violet (1% w/v in 20% methanol, Sigma, cat#  
704 C0775) for 1 hour. Inserts were washed with DPBS, and the cells that had not migrated  
705 through the pores and remained on the upper side of the membrane were removed with cotton  
706 swabs. Images were taken using EVOS XL Core microscope with 10x lens under brightfield.

707

#### 708 *Wound healing assay*

709

710 HSCs were plated in CytoSelect 24-well wound healing assay plates with inserts (Cell Biolabs,  
711 cat# CBA-120) at 400,000 cells/well in complete medium. Eighteen hours after plating, inserts  
712 were removed to generate a 0.9 mm wound field, and cells were incubated with complete

713 medium containing DMSO or NCMC for an additional 30 hours. Images were taken using  
714 EVOS FL microscope.

715

716 *Proliferation assay*

717

718 HSCs were seeded in black-wall 96-well plates (Corning, cat# 3603) at 3,000 cells/well, and  
719 18 hours later, DMSO and NCMC at different concentrations as indicated were added with six  
720 replicates. One plate was fixed on each day with 4% paraformaldehyde for five days  
721 consecutively and stored at 4°C until all plates were ready for staining with Hoechst.  
722 ImageXpress Micro Confocal microscope (Molecular Devices) was used for taking four  
723 images/well with 10x Plan Apo lens, and MetaXpress software was used for counting the  
724 number of nuclei.

725

726 *Apoptosis analysis by flow cytometry*

727

728 HSCs were treated with DMSO or NCMC at indicated concentrations for 48 hours, followed  
729 by trypsinization and staining with Annexin V and propidium iodide using Dead Cell Apoptosis  
730 Kit (Invitrogen, cat# V13241) according to manufacturer's instructions. Cells were analyzed  
731 using FACS Aria II (BD Biosciences).

732

733 *Quiescence/cell cycle analysis by flow cytometry*

734

735 HSCs were treated with DMSO or NCMC at indicated concentrations for 48 hours, trypsinized,  
736 harvested, washed with DPBS, and resuspended in 0.5mL DPBS. Cells were fixed by adding  
737 4.5mL ice-cold 70% ethanol in a drop wise manner while vortexing and were then kept at -  
738 20°C for at least 2 hours. Cells were washed twice with FACS buffer (DPBS supplemented  
739 with 2% heated-inactivated filtered fetal bovine serum and 1mM EDTA) before resuspending  
740 in FACS buffer at  $1 \times 10^6$  cells/100 $\mu$ L. Cells were then incubated with Ki-67 antibody

741 (0.25µg/100µL, clone SolA15, Invitrogen, cat# 11-5698-82) in the dark for 30 min at room  
742 temperature. After incubation, cells were washed twice with FACS buffer, followed by  
743 incubation with propidium iodide staining solution (DPBS supplemented with 50µg/ml  
744 propidium iodide (Invitrogen, cat# P3566), 10µg/ml RNase (Thermo Scientific, cat# EN0531)  
745 and 2 mM MgCl<sub>2</sub>) for another 20 min at room temperature before analysis by FACS Aria II (BD  
746 Biosciences).

747

#### 748 *Calcium measurements*

749

750 Fluo-4 NW calcium assay starter kit (Invitrogen, F36206) was used to measure cytosolic  
751 calcium according to the manufacturer's protocol in the presence and absence of 1 mM EGTA.  
752 HSCs were plated on a Corning 96 well UV transparent plate 24 hours prior to analysis. Media  
753 was removed and cells were washed with 1X calcium and magnesium chloride free PBS  
754 before adding the dye mix with probenecid with and without EGTA to each well. Plates were  
755 covered in aluminum foil and incubated at 37°C for 30 minutes. Plates were equilibrated to  
756 room temperature for 30 mins prior to analysis. Measurements were performed on a Tecan  
757 Infinite M Plex M-200 using I-control 2.0 software from Austria GmbH to measure fluorescence  
758 intensity with excitation at 494 nm and emission at 516 nm. Readings were performed by  
759 loading the plate immediately following treatment with DMSO or compounds at the indicated  
760 concentration. All measurements were normalized to time 0 by subtracting the initial value for  
761 each well. Based on this approach, the increase in Ca<sup>2+</sup> levels measured for ionomycin may  
762 be reduced due to a more rapid response to the compound. Measurements were plotted as  
763 change in relative fluorescence unit (RFU) at 50% gain on the Y-axis relative to time 0 in  
764 seconds on the X-axis using Graphpad Prism 8.4.3.

765

#### 766 *Kinase array analysis*

767

768 HSCs from donor 3 were treated with DMSO or 1  $\mu$ M NCMC for 1 hour or 18 hours. Cell  
769 lysates were prepared and analyzed using the Proteome Profiler Human Phospho-Kinase  
770 Array Kit (R&D Systems, cat# ARY003B) according to manufacturer's instructions. Scanned  
771 films were quantified using ImageJ.

772

### 773 *RNAi-mediated depletion of gene expression*

774

775 HSCs were reverse transfected with siRNAs as indicated using Dharmafect-1 transfection  
776 reagent (Horizon Discovery, cat# T-2001) according to manufacturer's instructions. For 12-  
777 well plates, 60 $\mu$ L of 1 $\mu$ M siRNAs were added to 180 $\mu$ L Opti-MEM (Gibco, cat# 31985070) for  
778 the final concentration of 50nM and then mixed with diluted Dharmafect-1 in Opti-MEM (1.2 $\mu$ L  
779 Dharmafect-1 in 238.8 $\mu$ L Opti-MEM). After 30 min, HSCs resuspended in transfection medium  
780 (DMEM supplemented with 16% FCS) were seeded in the wells containing the  
781 siRNA/Dharmafect-1 mixture at 70,700 cells/mL in 720 $\mu$ L/well medium. Transfection in other  
782 plate formats were scaled up or down accordingly based on surface area. Cells were  
783 incubated with siRNAs and transfection reagents for 72 hours before analysis, unless  
784 indicated otherwise.

785

786 The siRNAs used in this study are siGENOME SMARTpool siRNAs (Horizon Discovery) for  
787 FYN (MQ-003140-04), HSP27 (M-005269-01), ERK1 (M-003592-03), ERK2 (M-003555-04),  
788 FAK (M-003164-02), STAT5A (M-005169-02) and STAT5B (M-010539-02) and individual  
789 siGENOME siRNAs for FYN (siRNA#1: D-003140-10, siRNA#2: D-003140-24).

790

### 791 *Cloning, lentivirus packaging and infection*

792

793 The cDNA encoding the dominant negative Y213A FYN mutant was amplified from the  
794 plasmid pRK5 DN-Fyn (gift from Filippo Giancotti, Addgene plasmid # 16033) using the  
795 following PCR primers: forward primer: 5'-CAT GCTAGC GCCACC

796 ATGGGCTGTGTGCAATGTAAGG-3'; reverse primer: 5'- AGC GAATTC  
797 TTACAGGTTTTTCACCAGGTTGGTAC-3'. The amplified PCR product was digested with NheI  
798 and EcoRI enzymes and inserted into linearized pLJM1 plasmid (gift from David Sabatini,  
799 Addgene, plasmid# 19319). Whole plasmid sequencing was performed to confirm that the DN-  
800 FYN sequence was correct.

801

802 HEK 293 cells were transfected with pLJM1-eGFP or pLJM1-DN-FYN plasmid together with  
803 lentivirus packing and envelope plasmids pMD2.G (gift from Didier Trono, Addgene plasmid#  
804 12259) and psPAX2 (gift from Didier Trono, Addgene plasmid# 12260) using X-tremeGENE  
805 9 DNA transfection reagent (Roche, cat# 6365779001) according to manufacturer's  
806 instructions. For a 10cm dish of 293 cells, 30 $\mu$ L X-tremeGENE 9 reagent, 750ng psPAX2,  
807 250ng pMD2.G and 1 $\mu$ g pLJM1-eGFP or pLJM1-DN-FYN were mixed in 500 $\mu$ L Opti-MEM and  
808 incubated for 15 min before added to culture medium in a drop wise manner. 24 hours later,  
809 culture medium was changed, and cells were incubated with fresh regular medium for another  
810 24 hours. Conditioned medium containing virus was then collected and filtered through  
811 0.45 $\mu$ m filters. HSCs were seeded to reach 30-40% confluency after 18 hours and then  
812 infected with viruses. Polybrene (Sigma-Aldrich, cat# TR-1003-G) was used at a final  
813 concentration of 10 $\mu$ g/mL to enhance infection efficiency.

814

815 *Western blot*

816

817 Cells were pelleted and lysed with RIPA buffer (150 mM sodium chloride, 1.0% Triton X-100,  
818 0.5% sodium deoxycholate, 0.1% SDS (sodium dodecyl sulfate) and 50 mM Tris, pH 8.0)  
819 supplemented with protease inhibitors (Thermo Scientific, cat# 87786) and phosphatase  
820 inhibitors (Thermo Scientific, cat# 78420). Cell lysates were centrifuged to remove debris.  
821 Protein concentrations were measured using Pierce™ BCA Protein Assay Kit (Thermo  
822 Scientific, cat# 23227). Bolt™ LDS Sample Buffer (Invitrogen, cat# B0007) and Bolt™ Sample  
823 Reducing Agent (Invitrogen, cat# B0009) were added to cell lysates and the sample mixture

824 was boiled for 10 min before loading. Bolt™ 4 to 12% Bis-Tris gels (Invitrogen, cat#  
825 NW04120BOX) were used for electrophoresis, followed by transferring with iBlot 2 Dry Blotting  
826 System (Invitrogen, cat# IB21002S). Membranes were blocked with 1% BSA (Thermo  
827 Scientific, cat# 37520, for phospho-Src family) or 3% milk (Lab Scientific, cat# M0841, for  
828 other proteins) at room temperature for 1 hour and incubated with primary antibody at 4°C for  
829 two days (for FYN) or overnight (for other proteins). Membranes were washed three times with  
830 Tris Buffered Saline-Tween (TBST) buffer (Boston BioProducts, cat# IBB-181-6), incubated  
831 with secondary antibody for another 1 hour, washed three times with TBST buffer, and then  
832 incubated with SuperSignal™ West Pico PLUS chemiluminescent substrates (Thermo  
833 Scientific, cat# 34580) for 5 min before exposure to film (Ece Scientific Co, cat# E3018). The  
834 following antibodies were used: FYN antibody (1:1000, Cell Signaling Technology, cat# 4023),  
835 phospho-Src family antibody (1:1000, Cell Signaling Technology, cat# 6943), HRP-β-Actin  
836 antibody (Santa Cruz Biotechnology, cat# sc-47778), phospho-p44/42 MAPK (Erk1/2)  
837 (Thr202/Tyr204) antibody (1:1000, Cell Signaling Technology, cat# 4370), and goat anti-rabbit  
838 IgG secondary antibody (Invitrogen, cat# 32460).

839

#### 840 *Data availability*

841

842 RNA sequencing data produced in this study have been submitted to GEO (GSE180980). The  
843 full dataset will be accessible when released.

844

#### 845 **Acknowledgements**

846 We thank the staff at the ICCB-Longwood Screening Facility, and especially Jennifer Smith  
847 and Richard Siu for their assistance in establishing and performing the small molecule screen.

848 We thank members of the Mullen lab in addition to Raymond Chung for helpful discussions,  
849 along with colleagues at Boehringer Ingelheim, including Birgit Goetz, Katja Thode, Elfriede

850 Mueller, Manuela Schuler, Nicola Zimmerman for experimental support, and Carine Boustany  
851 and Daniela Moutinho Dos Santos for helpful discussions. We also thank the MGH Next Gen



852 Sequencing Core, MGH Center for Regenerative Medicine Flow Cytometry Facility, and MGH  
853 Program in Membrane Biology Microscopy Core for their support. This work was funded  
854 through a grant from Boehringer Ingelheim.

855

## 856 **Competing interests**

857 MB, JFR, and JFD are employees of Boehringer Ingelheim. ACM receives funding from  
858 Bristol-Myers Squibb and GlaxoSmithKline for unrelated projects and is a consultant for Circ  
859 Bio.

860

## 861 **References**

862

- 863 Alsamman, S., Christenson, S. A., Yu, A., Ayad, N. M. E., Mooring, M. S., Segal, J. M., . . .  
864 Chen, J. Y. (2020). Targeting acid ceramidase inhibits YAP/TAZ signaling to reduce  
865 fibrosis in mice. *Sci Transl Med*, 12(557).  
866 <https://doi.org/10.1126/scitranslmed.aay8798>
- 867 Anstee, Q. M., Reeves, H. L., Kotsiliti, E., Govaere, O., & Heikenwalder, M. (2019). From  
868 NASH to HCC: current concepts and future challenges. *Nat Rev Gastroenterol Hepatol*,  
869 16(7), 411-428. <https://doi.org/10.1038/s41575-019-0145-7>
- 870 Baell, J. B., & Nissink, J. W. M. (2018). Seven Year Itch: Pan-Assay Interference Compounds  
871 (PAINS) in 2017-Utility and Limitations. *ACS Chem Biol*, 13(1), 36-44.  
872 <https://doi.org/10.1021/acscchembio.7b00903>
- 873 Bataller, R., & Brenner, D. A. (2005). Liver fibrosis. *J Clin Invest*, 115(2), 209-218.  
874 <https://doi.org/10.1172/JCI24282>
- 875 Benyon, R. C., & Iredale, J. P. (2000). Is liver fibrosis reversible? *Gut*, 46(4), 443-446.  
876 <https://doi.org/10.1136/gut.46.4.443>
- 877 Bonis, P. A., Friedman, S. L., & Kaplan, M. M. (2001). Is liver fibrosis reversible? *N Engl J*  
878 *Med*, 344(6), 452-454. <https://doi.org/10.1056/NEJM200102083440610>
- 879 Bosch, M., Gil, J., Bachs, O., & Agell, N. (1998). Calmodulin inhibitor W13 induces sustained  
880 activation of ERK2 and expression of p21(cip1). *J Biol Chem*, 273(34), 22145-22150.  
881 <https://doi.org/10.1074/jbc.273.34.22145>
- 882 Chen, C. Z., Peng, Y. X., Wang, Z. B., Fish, P. V., Kaar, J. L., Koepsel, R. R., . . . Raghunath,  
883 M. (2009). The Scar-in-a-Jar: studying potential antifibrotic compounds from the  
884 epigenetic to extracellular level in a single well. *Br J Pharmacol*, 158(5), 1196-1209.  
885 <https://doi.org/10.1111/j.1476-5381.2009.00387.x>
- 886 Chen, J. Y., Newcomb, B., Zhou, C., Pondick, J. V., Ghoshal, S., York, S. R., . . . Mullen, A.  
887 C. (2017). Tricyclic Antidepressants Promote Ceramide Accumulation to Regulate  
888 Collagen Production in Human Hepatic Stellate Cells. *Sci Rep*, 7, 44867.  
889 <https://doi.org/10.1038/srep44867>
- 890 Chuderland, D., Marmor, G., Shainskaya, A., & Seger, R. (2020). Calcium-Mediated  
891 Interactions Regulate the Subcellular Localization of Extracellular Signal-Regulated  
892 Kinases (ERKs). *Cell Physiol Biochem*, 54(3), 474-492.  
893 <https://doi.org/10.33594/000000231>
- 894 Cook, S. J., Beltman, J., Cadwallader, K. A., McMahon, M., & McCormick, F. (1997).  
895 Regulation of mitogen-activated protein kinase phosphatase-1 expression by

- 896 extracellular signal-related kinase-dependent and Ca<sup>2+</sup>-dependent signal pathways in  
897 Rat-1 cells. *J Biol Chem*, 272(20), 13309-13319.  
898 <https://doi.org/10.1074/jbc.272.20.13309>
- 899 Dittmar, M., Lee, J. S., Whig, K., Segrist, E., Li, M., Jurado, K., . . . Cherry, S. (2020). Drug  
900 repurposing screens reveal FDA approved drugs active against SARS-Cov-2. *bioRxiv*,  
901 2020.2006.2019.161042. <https://doi.org/10.1101/2020.06.19.161042>
- 902 Du, G., Wang, J., Zhang, T., Ding, Q., Jia, X., Zhao, X., . . . Lu, Y. (2020). Targeting Src family  
903 kinase member Fyn by Saracatinib attenuated liver fibrosis in vitro and in vivo. *Cell*  
904 *Death Dis*, 11(2), 118. <https://doi.org/10.1038/s41419-020-2229-2>
- 905 Eisenberg, E., & Levanon, E. Y. (2013). Human housekeeping genes, revisited. *Trends Genet*,  
906 29(10), 569-574. <https://doi.org/10.1016/j.tig.2013.05.010>
- 907 Falize, L., Guillygomarc'h, A., Perrin, M., Lainé, F., Guyader, D., Brissot, P., . . . Deugnier, Y.  
908 (2006). Reversibility of hepatic fibrosis in treated genetic hemochromatosis: a study of  
909 36 cases. *Hepatology*, 44(2), 472-477. <https://doi.org/10.1002/hep.21260>
- 910 Filvaroff, E., Stern, D. F., & Dotto, G. P. (1990). Tyrosine phosphorylation is an early and  
911 specific event involved in primary keratinocyte differentiation. *Mol Cell Biol*, 10(3),  
912 1164-1173. <https://doi.org/10.1128/mcb.10.3.1164-1173.1990>
- 913 Friedman, S. L. (2008). Hepatic stellate cells: protean, multifunctional, and enigmatic cells of  
914 the liver. *Physiol Rev*, 88(1), 125-172. <https://doi.org/10.1152/physrev.00013.2007>
- 915 Friedman, S. L., Roll, F. J., Boyles, J., & Bissell, D. M. (1985). Hepatic lipocytes: the principal  
916 collagen-producing cells of normal rat liver. *Proc Natl Acad Sci U S A*, 82(24), 8681-  
917 8685. <https://doi.org/10.1073/pnas.82.24.8681>
- 918 Geerts, A. (2001). History, heterogeneity, developmental biology, and functions of quiescent  
919 hepatic stellate cells. *Semin Liver Dis*, 21(3), 311-335. <https://doi.org/10.1055/s-2001-17550>
- 920
- 921 Good, R. B., Eley, J. D., Gower, E., Butt, G., Blanchard, A. D., Fisher, A. J., & Nanthakumar,  
922 C. B. (2019). A high content, phenotypic 'scar-in-a-jar' assay for rapid quantification of  
923 collagen fibrillogenesis using disease-derived pulmonary fibroblasts. *BMC Biomedical*  
924 *Engineering*, 1(1), 14. <https://doi.org/10.1186/s42490-019-0014-z>
- 925 Guo, Y. C., & Lu, L. G. (2020). Antihepatic Fibrosis Drugs in Clinical Trials. *J Clin Transl*  
926 *Hepatol*, 8(3), 304-312. <https://doi.org/10.14218/JCTH.2020.00023>
- 927 Hernandez-Gea, V., & Friedman, S. L. (2011). Pathogenesis of liver fibrosis. *Annu Rev Pathol*,  
928 6, 425-456. <https://doi.org/10.1146/annurev-pathol-011110-130246>
- 929 Huang, M., Liu, B., Liu, R., Li, J., Chen, J., Jiang, F., . . . Liu, T. (2018). Aglycone Polyether  
930 Nanchangmycin and Its Homologues Exhibit Apoptotic and Antiproliferative Activities  
931 against Cancer Stem Cells. *ACS Pharmacol Transl Sci*, 1(2), 84-95.  
932 <https://doi.org/10.1021/acsptsci.8b00007>
- 933 Huczynski, A. (2012). Polyether ionophores-promising bioactive molecules for cancer therapy.  
934 *Bioorg Med Chem Lett*, 22(23), 7002-7010. <https://doi.org/10.1016/j.bmcl.2012.09.046>
- 935 Jones, K. T., & Sharpe, G. R. (1994). Thapsigargin raises intracellular free calcium levels in  
936 human keratinocytes and inhibits the coordinated expression of differentiation markers.  
937 *Exp Cell Res*, 210(1), 71-76. <https://doi.org/10.1006/excr.1994.1011>
- 938 Karlsen, T. H., Folseraas, T., Thorburn, D., & Vesterhus, M. (2017). Primary sclerosing  
939 cholangitis - a comprehensive review. *J Hepatol*, 67(6), 1298-1323.  
940 <https://doi.org/10.1016/j.jhep.2017.07.022>
- 941 Kaspar, J. W., & Jaiswal, A. K. (2011). Tyrosine phosphorylation controls nuclear export of  
942 Fyn, allowing Nrf2 activation of cytoprotective gene expression. *FASEB J*, 25(3), 1076-  
943 1087. <https://doi.org/10.1096/fj.10-171553>
- 944 Kevin li, D. A., Meujo, D. A., & Hamann, M. T. (2009). Polyether ionophores: broad-spectrum  
945 and promising biologically active molecules for the control of drug-resistant bacteria  
946 and parasites. *Expert Opin Drug Discov*, 4(2), 109-146.  
947 <https://doi.org/10.1517/17460440802661443>
- 948 Kisseleva, T., Cong, M., Paik, Y., Scholten, D., Jiang, C., Benner, C., . . . Brenner, D. A. (2012).  
949 Myofibroblasts revert to an inactive phenotype during regression of liver fibrosis. *Proc*  
950 *Natl Acad Sci U S A*, 109(24), 9448-9453. <https://doi.org/10.1073/pnas.1201840109>

- 951 Leite, S. B., Roosens, T., El Taghdouini, A., Mannaerts, I., Smout, A. J., Najimi, M., . . . van  
952 Grunsvan, L. A. (2016). Novel human hepatic organoid model enables testing of drug-  
953 induced liver fibrosis in vitro. *Biomaterials*, 78, 1-10.  
954 <https://doi.org/10.1016/j.biomaterials.2015.11.026>
- 955 Li, J.-Q., Huang, M., Zhang, Y.-N., Liu, R., Zhang, Z.-R., Zhang, Q.-Y., . . . Liu, T. (2020).  
956 Aglycone polyether ionophores as broad-spectrum agents inhibit multiple enveloped  
957 viruses including SARS-CoV-2 in vitro and successfully cure JEV infected mice.  
958 *bioRxiv*, 2020.2010.2027.354563. <https://doi.org/10.1101/2020.10.27.354563>
- 959 Maher, J. J., & McGuire, R. F. (1990). Extracellular matrix gene expression increases  
960 preferentially in rat lipocytes and sinusoidal endothelial cells during hepatic fibrosis in  
961 vivo. *J Clin Invest*, 86(5), 1641-1648. <https://doi.org/10.1172/JCI114886>
- 962 Matlock, M. K., Hughes, T. B., Dahlin, J. L., & Swamidass, S. J. (2018). Modeling Small-  
963 Molecule Reactivity Identifies Promiscuous Bioactive Compounds. *J Chem Inf Model*,  
964 58(8), 1483-1500. <https://doi.org/10.1021/acs.jcim.8b00104>
- 965 Maurer, B., Kollmann, S., Pickem, J., Hoelbl-Kovacic, A., & Sexl, V. (2019). STAT5A and  
966 STAT5B-Twins with Different Personalities in Hematopoiesis and Leukemia. *Cancers*  
967 (Basel), 11(11). <https://doi.org/10.3390/cancers11111726>
- 968 Mederacke, I., Hsu, C. C., Troeger, J. S., Huebener, P., Mu, X., Dapito, D. H., . . . Schwabe,  
969 R. F. (2013). Fate tracing reveals hepatic stellate cells as dominant contributors to liver  
970 fibrosis independent of its aetiology. *Nat Commun*, 4, 2823.  
971 <https://doi.org/10.1038/ncomms3823>
- 972 Mootha, V. K., Lindgren, C. M., Eriksson, K. F., Subramanian, A., Sihag, S., Lehar, J., . . .  
973 Groop, L. C. (2003). PGC-1alpha-responsive genes involved in oxidative  
974 phosphorylation are coordinately downregulated in human diabetes. *Nat Genet*, 34(3),  
975 267-273. <https://doi.org/10.1038/ng1180>
- 976 Morgan, A. J., & Jacob, R. (1994). Ionomycin enhances Ca<sup>2+</sup> influx by stimulating store-  
977 regulated cation entry and not by a direct action at the plasma membrane. *Biochem J*,  
978 300 ( Pt 3), 665-672. <https://doi.org/10.1042/bj3000665>
- 979 Murphy, S. L., Xu, J., Kochanek, K. D., Arias, E., & Tejada-Vera, B. (2021). Deaths: Final Data  
980 for 2018. *Natl Vital Stat Rep*, 69(13), 1-83.
- 981 Pagès, G., Lenormand, P., L'Allemain, G., Chambard, J. C., Meloche, S., & Pouyssegur, J.  
982 (1993). Mitogen-activated protein kinases p42mapk and p44mapk are required for  
983 fibroblast proliferation. *Proc Natl Acad Sci U S A*, 90(18), 8319-8323.  
984 <https://doi.org/10.1073/pnas.90.18.8319>
- 985 Pang, M., & Zhuang, S. (2010). Histone deacetylase: a potential therapeutic target for fibrotic  
986 disorders. *J Pharmacol Exp Ther*, 335(2), 266-272.  
987 <https://doi.org/10.1124/jpet.110.168385>
- 988 Piñero, J., Ramírez-Anguita, J. M., Saüch-Pitarch, J., Ronzano, F., Centeno, E., Sanz, F., &  
989 Furlong, L. I. (2020). The DisGeNET knowledge platform for disease genomics: 2019  
990 update. *Nucleic Acids Res*, 48(D1), D845-D855. <https://doi.org/10.1093/nar/gkz1021>
- 991 Rausch, K., Hackett, B. A., Weinbren, N. L., Reeder, S. M., Sadovsky, Y., Hunter, C. A., . . .  
992 Cherry, S. (2017). Screening Bioactives Reveals Nanchangmycin as a Broad  
993 Spectrum Antiviral Active against Zika Virus. *Cell Rep*, 18(3), 804-815.  
994 <https://doi.org/10.1016/j.celrep.2016.12.068>
- 995 Ribeiro, D., Freitas, M., Rocha, S., Lima, J. L. F. C., Carvalho, F., & Fernandes, E. (2018).  
996 Calcium Pathways in Human Neutrophils-The Extended Effects of Thapsigargin and  
997 ML-9. *Cells*, 7(11). <https://doi.org/10.3390/cells7110204>
- 998 Rusanescu, G., Qi, H., Thomas, S. M., Brugge, J. S., & Halegoua, S. (1995). Calcium influx  
999 induces neurite growth through a Src-Ras signaling cassette. *Neuron*, 15(6), 1415-  
1000 1425. [https://doi.org/10.1016/0896-6273\(95\)90019-5](https://doi.org/10.1016/0896-6273(95)90019-5)
- 1001 Sodhi, K., Srikanthan, K., Goguet-Rubio, P., Nichols, A., Mallick, A., Nawab, A., . . . Shapiro,  
1002 J. I. (2017). pNaKtide Attenuates Steatohepatitis and Atherosclerosis by Blocking  
1003 Na/K-ATPase/ROS Amplification in C57Bl6 and ApoE Knockout Mice Fed a Western  
1004 Diet. *Sci Rep*, 7(1), 193. <https://doi.org/10.1038/s41598-017-00306-5>

- 1005 Subramanian, A., Tamayo, P., Mootha, V. K., Mukherjee, S., Ebert, B. L., Gillette, M. A., . . .  
1006 Mesirov, J. P. (2005). Gene set enrichment analysis: a knowledge-based approach for  
1007 interpreting genome-wide expression profiles. *Proc Natl Acad Sci U S A*, 102(43),  
1008 15545-15550. <https://doi.org/10.1073/pnas.0506580102>
- 1009 Sun, Y., Zhou, X., Liu, J., Bao, K., Zhang, G., Tu, G., . . . Deng, Z. (2002). 'Streptomyces  
1010 nanchangensis', a producer of the insecticidal polyether antibiotic nanchangmycin and  
1011 the antiparasitic macrolide meilingmycin, contains multiple polyketide gene clusters.  
1012 *Microbiology (Reading)*, 148(Pt 2), 361-371. <https://doi.org/10.1099/00221287-148-2-361>  
1013
- 1014 Sun, Y. M., Chen, S. Y., & You, H. (2020). Regression of liver fibrosis: evidence and  
1015 challenges. *Chin Med J (Engl)*, 133(14), 1696-1702.  
1016 <https://doi.org/10.1097/CM9.0000000000000835>
- 1017 Svenningsen, E. B., Thyrssted, J., Blay-Cadanet, J., Liu, H., Lin, S., Villameriel, J. M., . . .  
1018 Poulsen, T. B. (2020). Ionophore antibiotic X-206 is a potent and selective inhibitor of  
1019 SARS-CoV-2 infection *in vitro*. *bioRxiv*, 2020.2006.2014.149153.  
1020 <https://doi.org/10.1101/2020.06.14.149153>
- 1021 Tian, J., & Xie, Z. J. (2008). The Na-K-ATPase and calcium-signaling microdomains.  
1022 *Physiology (Bethesda)*, 23, 205-211. <https://doi.org/10.1152/physiol.00008.2008>
- 1023 Troeger, J. S., Mederacke, I., Gwak, G. Y., Dapito, D. H., Mu, X., Hsu, C. C., . . . Schwabe, R.  
1024 F. (2012). Deactivation of hepatic stellate cells during liver fibrosis resolution in mice.  
1025 *Gastroenterology*, 143(4), 1073-1083.e1022.  
1026 <https://doi.org/10.1053/j.gastro.2012.06.036>
- 1027 Xia, Z., Dudek, H., Miranti, C. K., & Greenberg, M. E. (1996). Calcium influx via the NMDA  
1028 receptor induces immediate early gene transcription by a MAP kinase/ERK-dependent  
1029 mechanism. *J Neurosci*, 16(17), 5425-5436.
- 1030 Xu, Y., Sun, T., Zeng, K., Xu, M., Chen, J., Xu, X., . . . Mao, X. (2020). Anti-bacterial and anti-  
1031 viral nanchangmycin displays anti-myeloma activity by targeting Otub1 and c-Maf. *Cell*  
1032 *Death Dis*, 11(9), 818. <https://doi.org/10.1038/s41419-020-03017-4>
- 1033 Yoon, S., Kang, G., & Eom, G. H. (2019). HDAC Inhibitors: Therapeutic Potential in Fibrosis-  
1034 Associated Human Diseases. *Int J Mol Sci*, 20(6).  
1035 <https://doi.org/10.3390/ijms20061329>
- 1036 Younossi, Z. M., Koenig, A. B., Abdelatif, D., Fazel, Y., Henry, L., & Wymer, M. (2016). Global  
1037 epidemiology of nonalcoholic fatty liver disease-Meta-analytic assessment of  
1038 prevalence, incidence, and outcomes. *Hepatology*, 64(1), 73-84.  
1039 <https://doi.org/10.1002/hep.28431>
- 1040 Zhang, D. Y., Goossens, N., Guo, J., Tsai, M. C., Chou, H. I., Altunkaynak, C., . . . Friedman,  
1041 S. L. (2016). A hepatic stellate cell gene expression signature associated with  
1042 outcomes in hepatitis C cirrhosis and hepatocellular carcinoma after curative resection.  
1043 *Gut*, 65(10), 1754-1764. <https://doi.org/10.1136/gutjnl-2015-309655>
- 1044 Zhao, X. K., Cheng, Y., Liang Cheng, M., Yu, L., Mu, M., Li, H., . . . Zhang, Q. (2016). Focal  
1045 Adhesion Kinase Regulates Fibroblast Migration via Integrin beta-1 and Plays a  
1046 Central Role in Fibrosis. *Sci Rep*, 6, 19276. <https://doi.org/10.1038/srep19276>
- 1047 Zhao, X. K., Yu, L., Cheng, M. L., Che, P., Lu, Y. Y., Zhang, Q., . . . Ding, Q. (2017). Focal  
1048 Adhesion Kinase Regulates Hepatic Stellate Cell Activation and Liver Fibrosis. *Sci Rep*,  
1049 7(1), 4032. <https://doi.org/10.1038/s41598-017-04317-0>
- 1050 Zhou, J., Yi, Q., & Tang, L. (2019). The roles of nuclear focal adhesion kinase (FAK) on Cancer:  
1051 a focused review. *J Exp Clin Cancer Res*, 38(1), 250. <https://doi.org/10.1186/s13046-019-1265-1>  
1052  
1053

1054 **Figures and Legends**

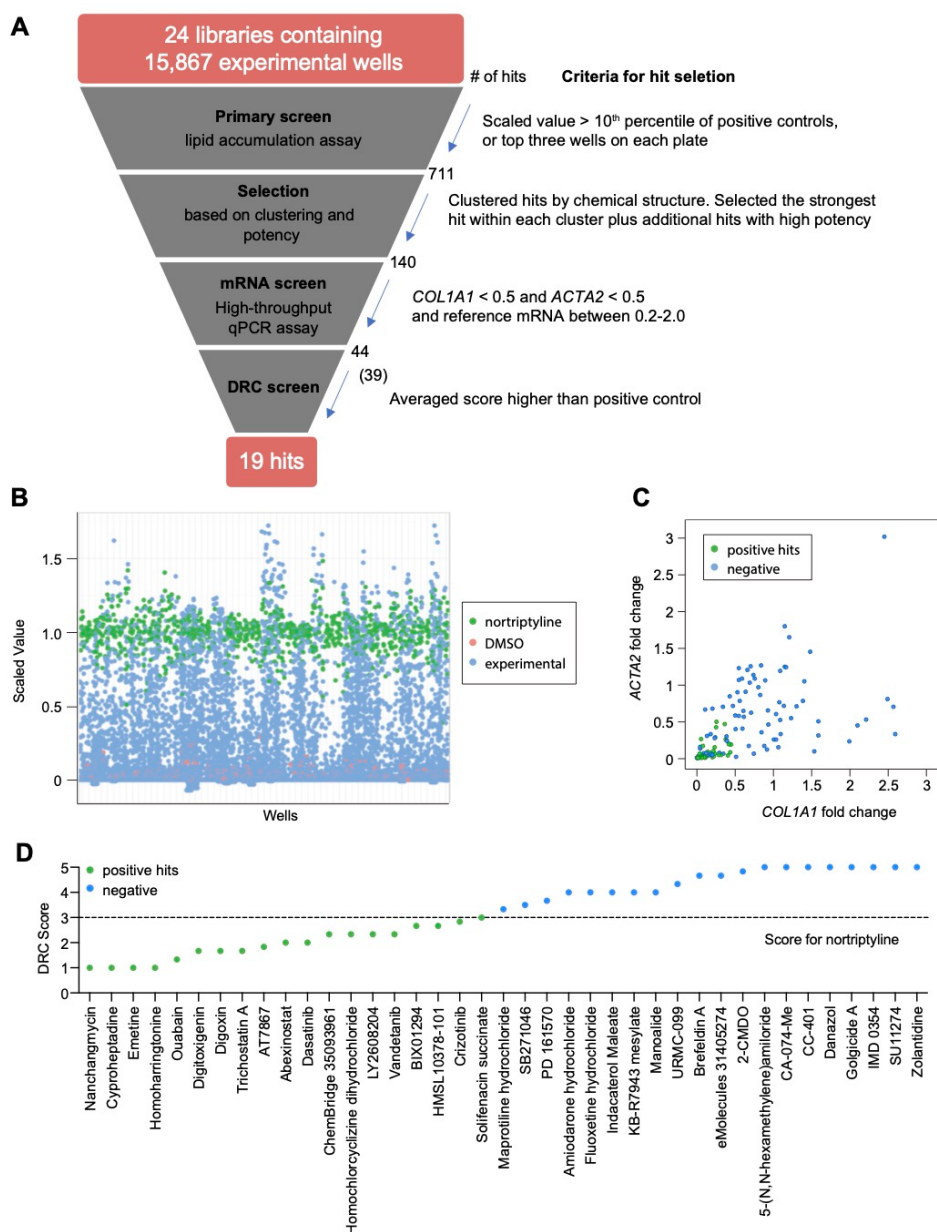

1055

1056 **Figure 1. High-throughput small molecule screen in primary human HSCs**

1057 **A.** Overview of the small molecule screen. The number of candidate compounds (# of hits) is  
 1058 indicated at each step. The number in parenthesis represents the number of compounds  
 1059 tested in the final dose response curve (DRC) analysis due to availability. **B.** Results of the  
 1060 primary lipid accumulation screen. Each dot indicates the mean scaled value of two replicates  
 1061 for each condition at 48 hours. Red dots represent negative control wells (DMSO), green dots  
 1062 represent positive control wells (nortriptyline, 27  $\mu$ M), and blue dots represent experimental  
 1063 wells. **C.** Results of the secondary mRNA screen. Each dot indicates the mean fold change of  
 1064 *ACTA2* and *COL1A1* after treatment with compounds (normalized to DMSO controls). *PSMB2*  
 1065 was used as the reference gene (n=4). Green dots represent positive hits (<0.5), and blue  
 1066 dots represent non-hits (negative). **D.** Dose-response curves were plotted for 39 compounds  
 1067 and were scored by three researchers independently. The mean score for each compound  
 1068 was plotted. The dotted line indicates the score of the positive control nortriptyline. Green dots  
 1069 represent positive hits, and blue dots represent non-hits (negative). This figure has two  
 1070 supplements.

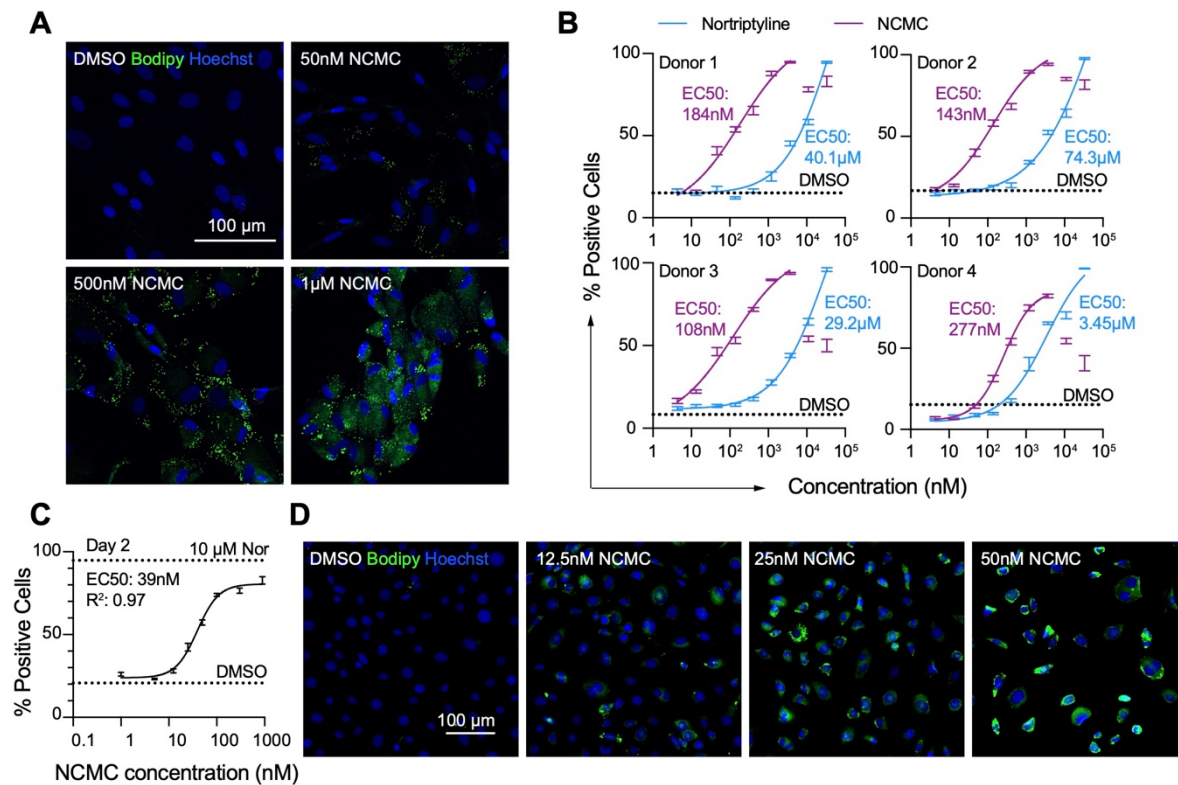

1071

1072 **Figure 2. NCMC induces lipid accumulation in HSCs**

1073 **A.** Representative microscopic images of HSCs treated with DMSO and NCMC for 48 hours.  
 1074 Cells were stained with Bodipy to identify lipid droplets (green) and Hoechst to define nuclei  
 1075 (blue). Scale bar represents 100 µm. **B.** Dose response curves for NCMC (purple) and  
 1076 nortriptyline (blue) in HSCs isolated from four different human donors at 48 hours. Dotted line  
 1077 represents the mean percentage of Bodipy-positive cells in DMSO control wells. Error bars  
 1078 represent mean ± SEM (n=12). One experiment was performed for each of four donor lines.  
 1079 Curves were generated by fitting the data to a sigmoidal model. The data from the highest two  
 1080 concentrations of NCMC treatment (11 and 33 µM) were not used for fitting due to higher  
 1081 toxicity at these concentrations, as indicated by cell number (Figure 2 – figure supplement 1).  
 1082 **C.** Dose response curve for NCMC treatment in murine primary HSCs at 48 hours. Dotted  
 1083 lines represent the averaged percentage of Bodipy-positive cells in DMSO negative control  
 1084 wells (lower) and nortriptyline positive control wells (10 µM, upper). Error bars represent mean  
 1085 ± SEM (n=6). **D.** Representative images of murine HSCs treated with DMSO and NCMC for  
 1086 48 hours and stained with Bodipy to identify lipid droplets (green) and Hoechst to define nuclei  
 1087 (blue). Scale bar represents 100 µm. This figure has two supplements.  
 1088

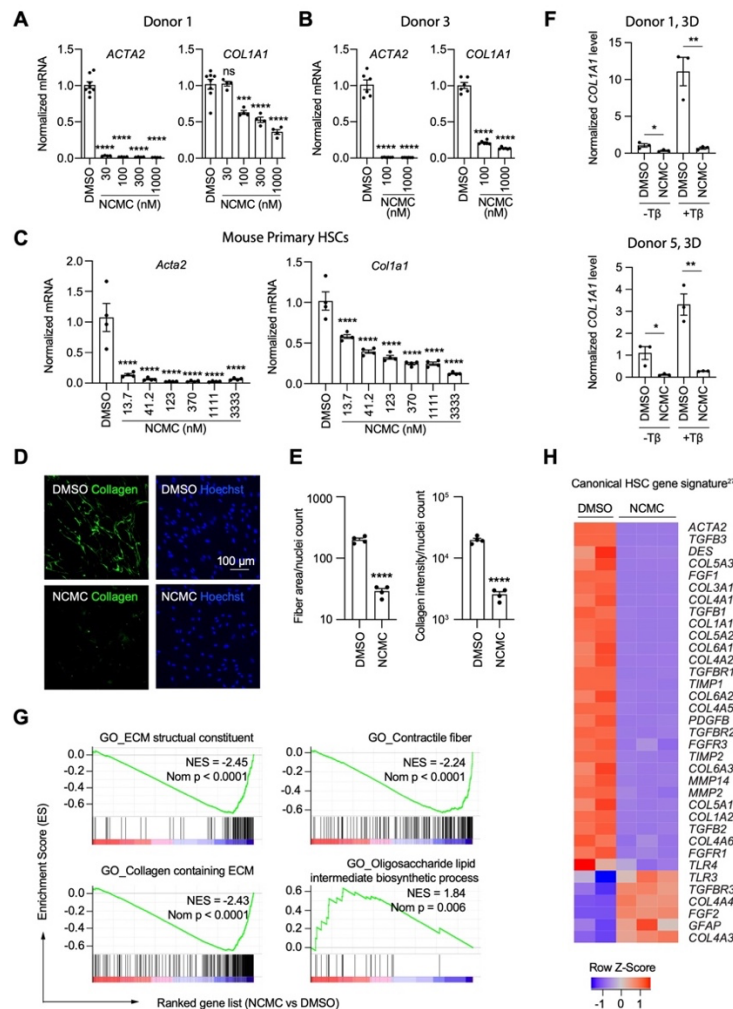

1089

1090 **Figure 3. NCMC inhibits expression of fibrotic genes in HSCs**

1091 **A-B.** Effect of 48 hr NCMC treatment on *ACTA2* and *COL1A1* in HSCs from human donors 1  
1092 (A) and 3 (B). Error bars represent mean ± SEM (n=3). Data are representative of three  
1093 independent experiments. ns indicates not significant, \*\*\* indicates p < 0.001, and \*\*\*\*  
1094 indicates p < 0.0001 (one-way ANOVA test). **C.** Effect of 48-hour NCMC treatment on *Acta2*  
1095 and *Col1a1* in primary mouse HSCs. Error bars represent mean ± SEM (n=4). Data are  
1096 representative of three independent experiments. \*\*\*\* indicates p < 0.0001 (one-way ANOVA  
1097 test). **D-E.** Effect of 48hr NCMC treatment (1 μM) on collagen deposition in ECM. **D:**  
1098 representative images. Scale bar represents 100 μm. Collagen protein is indicated in green  
1099 and nuclei for the same field are indicated in blue. **E:** quantified results. Error bars represent  
1100 mean ± SEM (n=4). Data are representative of three independent experiments. \*\*\*\* indicates  
1101 p < 0.0001 (Student's t-test). **F.** qPCR analysis of *COL1A1* in HSC-hepatocyte spheroids  
1102 treated with NCMC with and without TGF-β (Tβ). Error bars represent mean ± SEM (n=3).  
1103 One experiment was performed for each donor shown. \* indicates p < 0.05 (Student's t-test)  
1104 and \*\* indicates p < 0.01 (Student's t-test). Analysis was performed on day 3 (3D). **G-H.** RNA  
1105 sequencing analysis of HSCs (donor 1) treated with DMSO or 1 μM NCMC for 48 hours. **G:**  
1106 Representative gene sets from the gene set enrichment analysis (GSEA). NES refers to  
1107 normalized enrichment score. Nom P refers to Nominal P value. Vertical black lines refer to  
1108 affected genes in the indicated signatures. Red color indicates positive correlation, and blue  
1109 color indicates negative correlation. **H:** Heatmap showing RNA-seq expression for the  
1110 canonical HSC gene signature (Zhang et al., 2016). All genes from the signature that are  
1111 expressed in HSCs (with a minimum of five reads) were shown regardless of their expression  
1112 patterns. Z-score values are also provided in Supplementary Table 8. This figure has one  
1113 supplement.

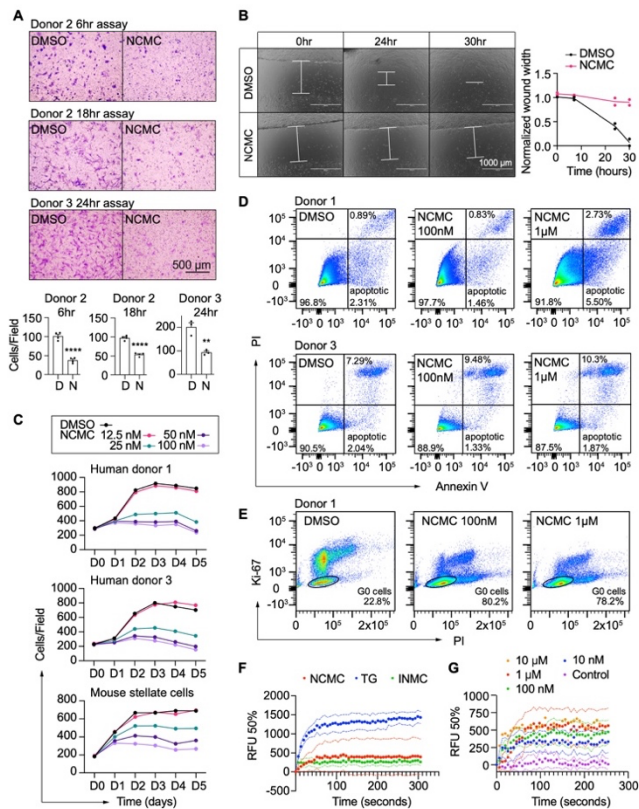

1114

1115 **Figure 4. NCMC inhibits HSC migration and proliferation and increases cytosolic**  
 1116 **calcium concentration**

1117 **A.** Transwell migration assay results of HSCs treated with DMSO or 1  $\mu$ M NCMC for 48hr.  
 1118 Top: representative images. Scale bar represents 500  $\mu$ m. Bottom: quantification of migrated  
 1119 cells (n=3 for each experiment). \*\* indicates p < 0.01, and \*\*\*\* indicates p < 0.0001 (Student's  
 1120 t-test). **B.** Wound healing assay results of HSCs treated with DMSO or NCMC. HSCs were  
 1121 seeded in complete medium, and immediately after generating the wound field, DMSO and 1  
 1122  $\mu$ M NCMC were added. The closure of the wound field was monitored for up to 30 hours as  
 1123 indicated. Left: representative images. White bars highlight the width of the wound field. Scale  
 1124 bar represents 1000  $\mu$ m. Right: quantification of wound width. (n=2). Data are representative  
 1125 of three independent experiments. **C.** Cell count for HSCs treated with DMSO or NCMC over  
 1126 the indicated time in days. Top: human HSCs from donor 1. Middle: human HSCs from donor  
 1127 3. Bottom: mouse HSCs. Error bars represent mean  $\pm$  SEM (n=6) but are too small to be  
 1128 visualized. One experiment was performed for each HSC line shown. **D.** Flow cytometry  
 1129 analysis of Annexin V and propidium iodide (PI) stained HSCs from human donor 1 (top) and  
 1130 3 (bottom) treated with DMSO or NCMC for 48 hours. Plots are representative of two  
 1131 independent experiments. **E.** Flow cytometry analysis of Ki-67 and PI stained HSCs from  
 1132 human donor 1 treated with DMSO or NCMC for 24 hours. Plots are representative of two  
 1133 independent experiments. **F.** Measurement of cytosolic calcium level using fluo-4 NW. HSCs  
 1134 from donor 3 were pre-loaded with fluo-4 NW and fluorescent intensity was read immediately  
 1135 after adding compounds (NCMC: nanchangmycin (red), TG: thapsigargin (blue), INMC:  
 1136 ionomycin (green)). The plot demonstrates results from three independent experiments. Solid  
 1137 dots represent mean, and dotted lines represent SEM (n=3). RFU: Relative fluorescence unit.  
 1138 **G.** Measurement of cytosolic calcium level after adding NCMC at indicated concentrations in  
 1139 HSCs from donor 3 (magenta: control (no compound, no DMSO), blue: 10 nM, green: 100 nM,  
 1140 red 1  $\mu$ M, orange: 10  $\mu$ M). The plot demonstrates results from one experiment for 10  $\mu$ M and  
 1141 five independent experiments for the other concentrations. Solid dots represent mean, and  
 1142 dotted lines represent SEM (n=3). This figure has two supplements.  
 1143



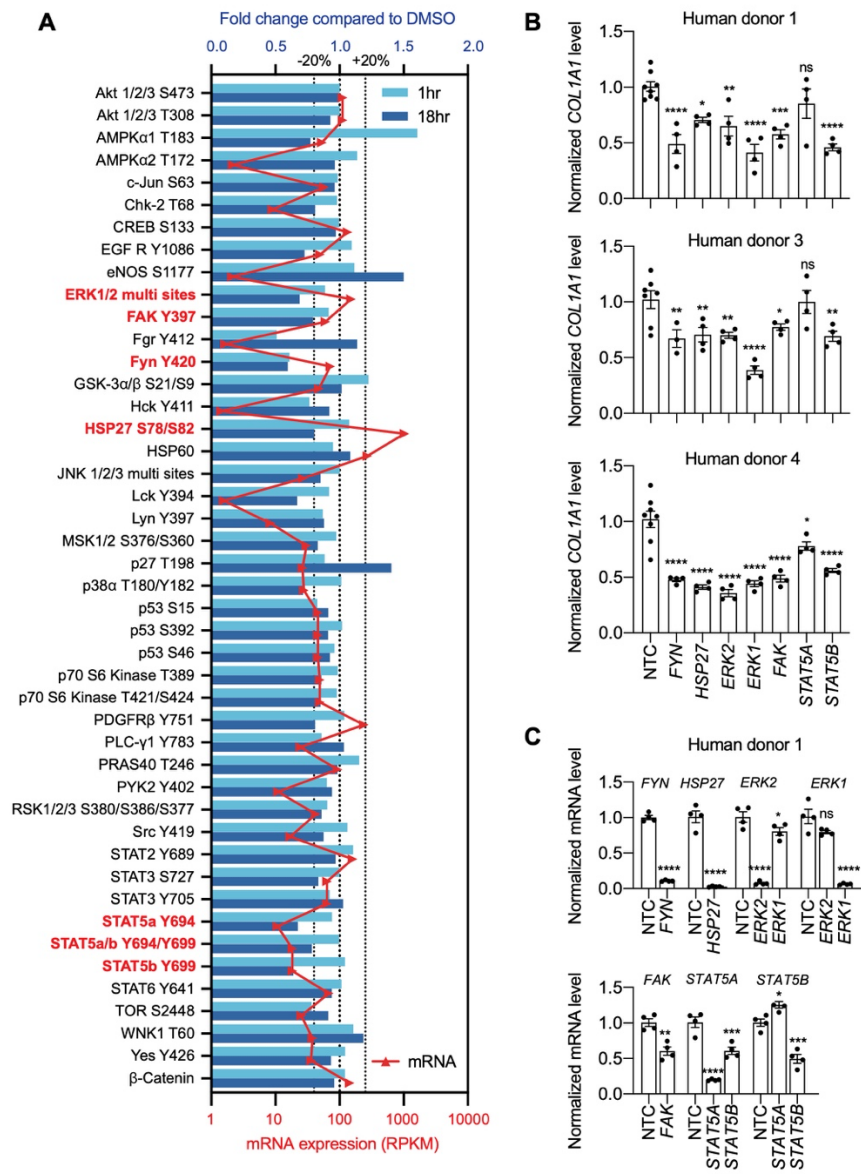

1144

1145 **Figure 5. Multiple kinases mediate the effect of NCMC on COL1A1 expression**

1146 **A.** Kinase array analysis of HSCs treated with DMSO or 1  $\mu$ M NCMC for 1 or 18 hours. Blue  
 1147 bars indicate mean fold change (n=2) in phosphorylation at specified sites in NCMC-treated  
 1148 cells compared to DMSO-treated cells at 1 hour (light blue) or 18 hours (dark blue). Red  
 1149 triangles indicate the mean RPKM of each corresponding kinase mRNA based on RNA  
 1150 sequencing of HSCs (Chen et al., 2017). The three dotted lines represent 20%  
 1151 increase/decrease or no change in phosphorylation. Kinases highlighted in red were chosen  
 1152 for further investigation. **B.** The expression of each candidate kinase gene was depleted using  
 1153 pooled siRNAs, and after 72 hours, COL1A1 level was determined by qRT-PCR in HSCs  
 1154 isolated from human donor 1 (top), 3 (middle), or 4 (bottom). A non-targeting siRNA is used  
 1155 as a control (NTC). Error bars represent mean  $\pm$  SEM (n  $\geq$  4, as indicated by the number of  
 1156 dots). ns indicates not significant (p > 0.05), \* indicates p < 0.05, \*\* indicates p < 0.01, \*\*\*  
 1157 indicates p < 0.001, and \*\*\*\* indicates p < 0.0001 (one-way ANOVA test). **C.** Knockdown  
 1158 efficiency of each siRNA pool in HSCs from human donor 1. Error bars represent mean  $\pm$  SEM  
 1159 (n  $\geq$  4). ns indicates not significant (p > 0.05), \* indicates p < 0.05, \*\* indicates p < 0.01, \*\*\*  
 1160 indicates p < 0.001, and \*\*\*\* indicates p < 0.0001 (Student's t-test performed for FYN, HSP27,  
 1161 and FAK depletion, and one-way ANOVA test performed for ERK1, ERK2, STAT5A and  
 1162 STAT5B depletion). This figure has one supplement.

1163

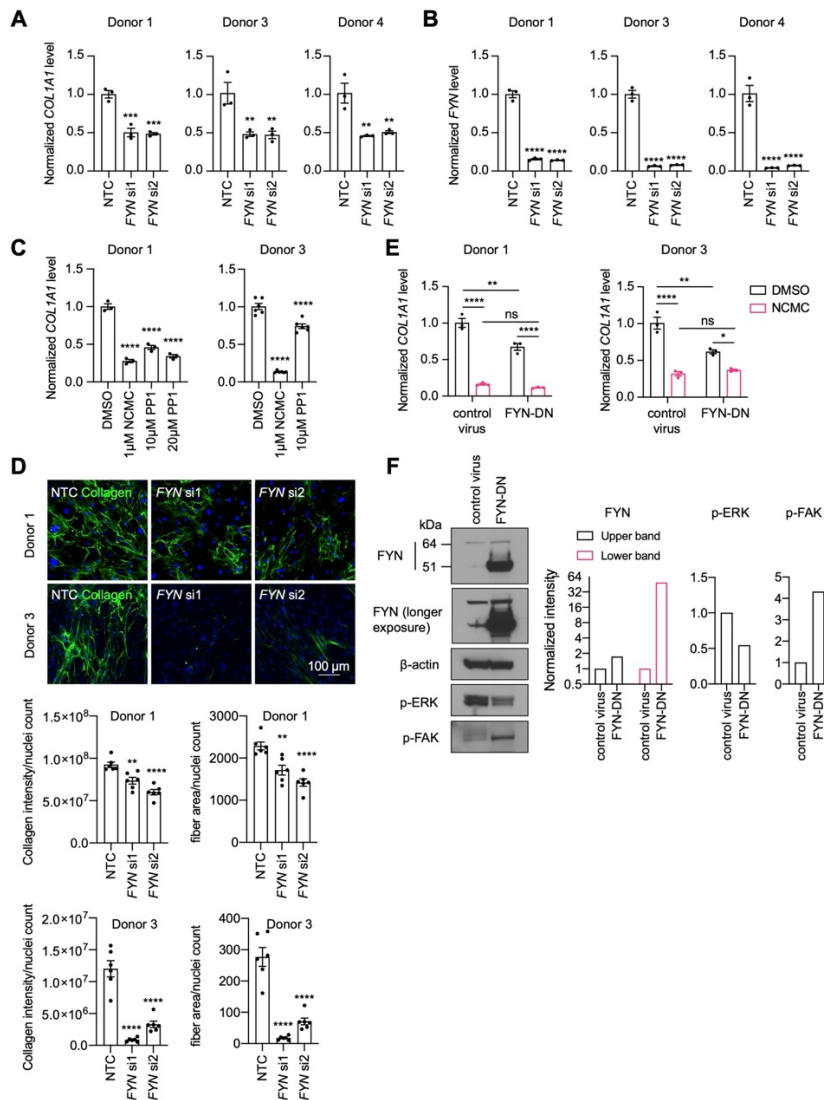

1164

1165 **Figure 6. FYN/ERK pathway regulates collagen expression**

1166 **A-B.** *FYN* was depleted in HSCs with two siRNAs (si1 and si2). The expression levels of  
1167 *COL1A1* (**A**) and *FYN* (**B**) were analyzed by qPCR after 72 hours in comparison to a non-  
1168 non-targeting control siRNA (NTC). Error bars represent mean ± SEM (n=3) for each of three donor  
1169 lines. \*\* indicates p < 0.01, \*\*\* indicates p < 0.001, and \*\*\*\* indicates p < 0.0001 (one-way  
1170 ANOVA test). **C.** HSCs were treated with NCMC or 1-Naphthyl PP1 (PP1) for 48 hours.  
1171 *COL1A1* level was analyzed by qPCR. Error bars represent mean ± SEM (n=3 for donor 1,  
1172 and n=6 for donor 3). Data are representative of three independent experiments for donor 1  
1173 and experiment for donor 3. \*\*\*\* indicates p < 0.0001 (one-way ANOVA test). **D.** Effect of *FYN*-  
1174 depletion on collagen deposition in ECM. Top: representative images. Scale bar represents  
1175 100 µm. Bottom: quantified results. Error bars represent mean ± SEM (n=6). Data are  
1176 representative of two independent experiments. \*\* indicates p < 0.01, and \*\*\*\* indicates p <  
1177 0.0001 (one-way ANOVA test). **E.** HSCs transduced with control virus or virus containing the  
1178 cDNA encoding dominant negative mutant *FYN* (*FYN*-DN) were treated with DMSO or 100  
1179 nM NCMC for 48 hours. Expression of *COL1A1* was quantified by qPCR. Error bars represent  
1180 mean ± SEM (n=3). Data are representative of three independent experiments). ns indicates  
1181 not significant (p > 0.05), \* indicates p < 0.05, \*\* indicates p < 0.01, and \*\*\*\* indicates p <  
1182 0.0001 (two-way ANOVA test). **F.** Phospho-ERK and phospho-FAK levels were determined  
1183 by Western blot in control HSCs and HSCs overexpressing DN-*FYN*. Left: representative  
1184 Western blot results. Right: quantified results. Representative of two independent experiments.  
1185 This figure has four supplements.

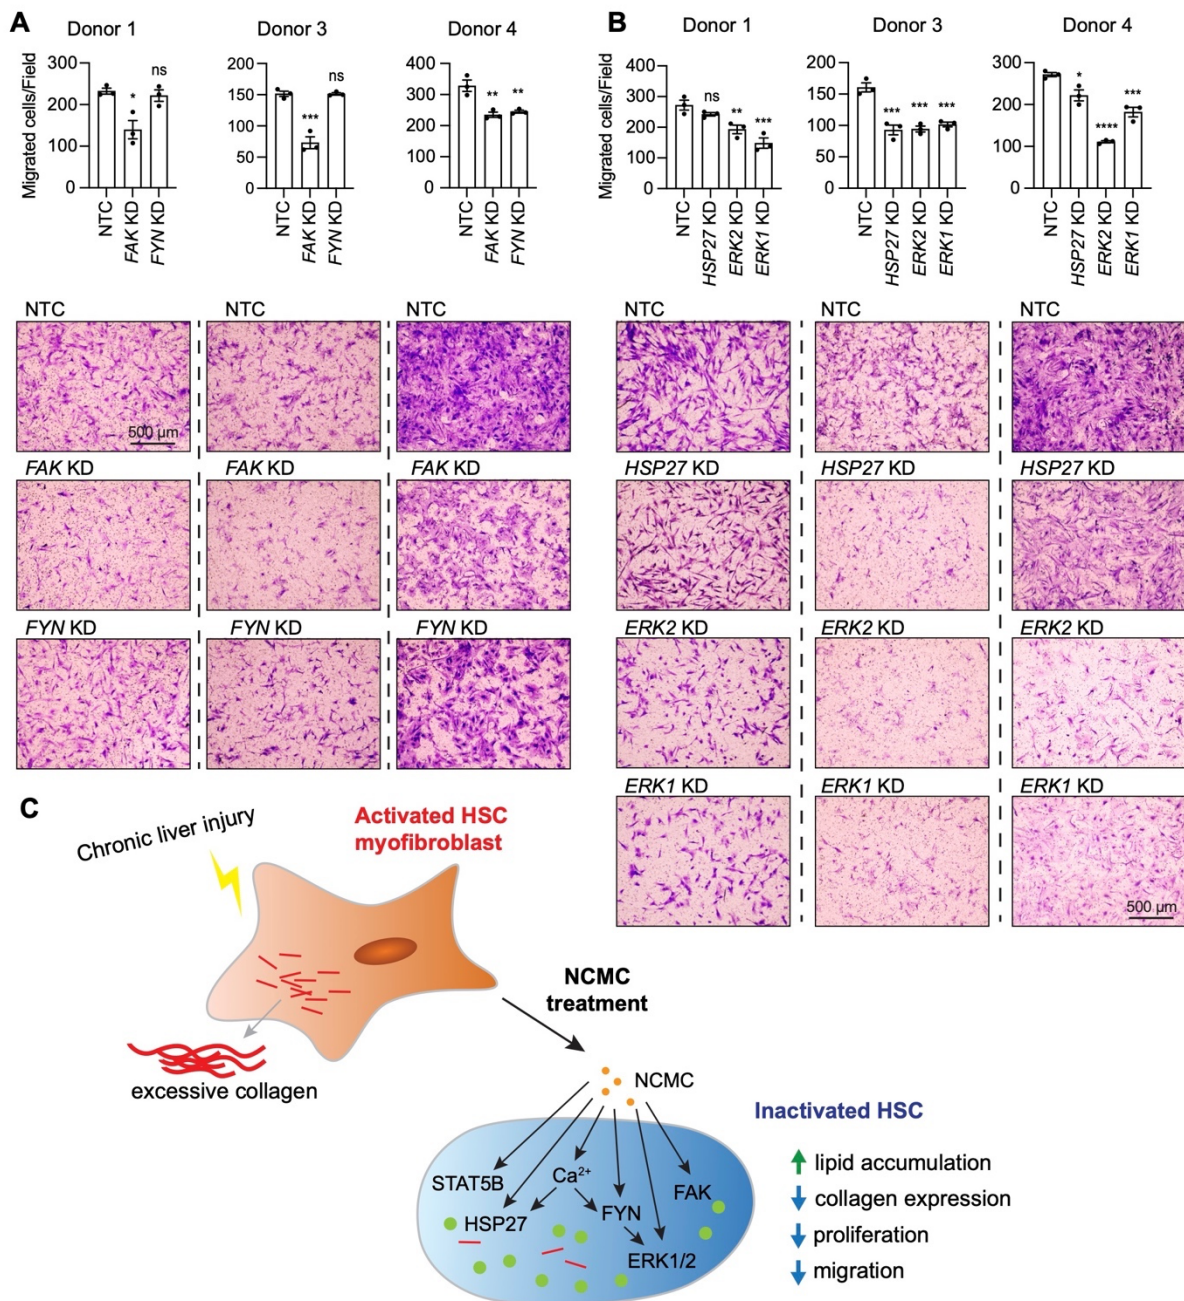

1186

1187 **Figure 7. ERK and FAK regulate HSC migration**

1188 **A-B.** Kinases were depleted in HSCs with pooled siRNAs. NTC indicates non-targeting siRNA  
 1189 control. KD indicates the gene transcript that is knocked down. After 72 hours, cells were  
 1190 seeded for transwell migration assay. Migration was assayed at 24 hours for HSCs from donor  
 1191 1 and 4, and 6 hours for HSCs from donor 3. Top: quantified results. Error bars represent  
 1192 mean ± SEM (n=3). Results are shown for three donor lines. ns indicates not significant (p >  
 1193 0.05), \* indicates p < 0.05, \*\* indicates p < 0.01, \*\*\* indicates p < 0.001, and \*\*\*\* indicates p <  
 1194 0.0001 (one-way ANOVA test). Bottom: representative images. Scale bar represents 500 μm.  
 1195 **C.** Schematic summarizing the signaling pathways triggered by NCMC treatment and the  
 1196 effect on HSC activity. Red lines represent collagen, orange spots represent NCMC, and  
 1197 green spots represent lipid droplets.  
 1198

1199

1200 **Table 1. Candidates from small molecule screening**

| Compound Name                      | DRC Score | Known function                                          |
|------------------------------------|-----------|---------------------------------------------------------|
| Cyproheptadine *                   | 1.0       | serotonin antagonist and antihistamine                  |
| Emetine *                          | 1.0       | anti-protozoal, inhibitor of Zika and Ebola viruses     |
| Homoharringtonine *                | 1.0       | translation elongation inhibitor                        |
| Nanchangmycin *                    | 1.0       | polyether ionophore antibiotic, inhibitor of Zika virus |
| Ouabain *                          | 1.3       | Na/K-ATPase inhibitor                                   |
| Digitoxigenin *                    | 1.7       | Na/K-ATPase inhibitor                                   |
| Digoxin *                          | 1.7       | Na/K-ATPase inhibitor                                   |
| Trichostatin A *                   | 1.7       | histone deacetylase inhibitor                           |
| AT7867, HMSL10154-101-1            | 1.8       | multi-kinase inhibitor                                  |
| PCI-24781 (Abexinostat) *          | 2.0       | histone deacetylase inhibitor                           |
| Dasatinib                          | 2.0       | multi-kinase inhibitor                                  |
| ChemBridge 35093961                | 2.3       | IKK inhibitor                                           |
| Homochlorcyclizine dihydrochloride | 2.3       | antihistamine                                           |
| LY2608204                          | 2.3       | glucokinase activator                                   |
| Vandetanib                         | 2.3       | multi-kinase inhibitor                                  |
| BIX01294 (hydrochloride hydrate)   | 2.7       | G9a histone methyltransferase inhibitor                 |
| HMSL10378-101                      | 2.7       | predicted to target GSK3B at 1 nM (ChEMBL)              |
| Crizotinib                         | 2.8       | multi-kinase inhibitor                                  |
| Solifenacin succinate              | 3.0       | muscarinic receptor antagonist                          |

1201

1202 \* Compounds with an EC50 less than 5  $\mu$ M.

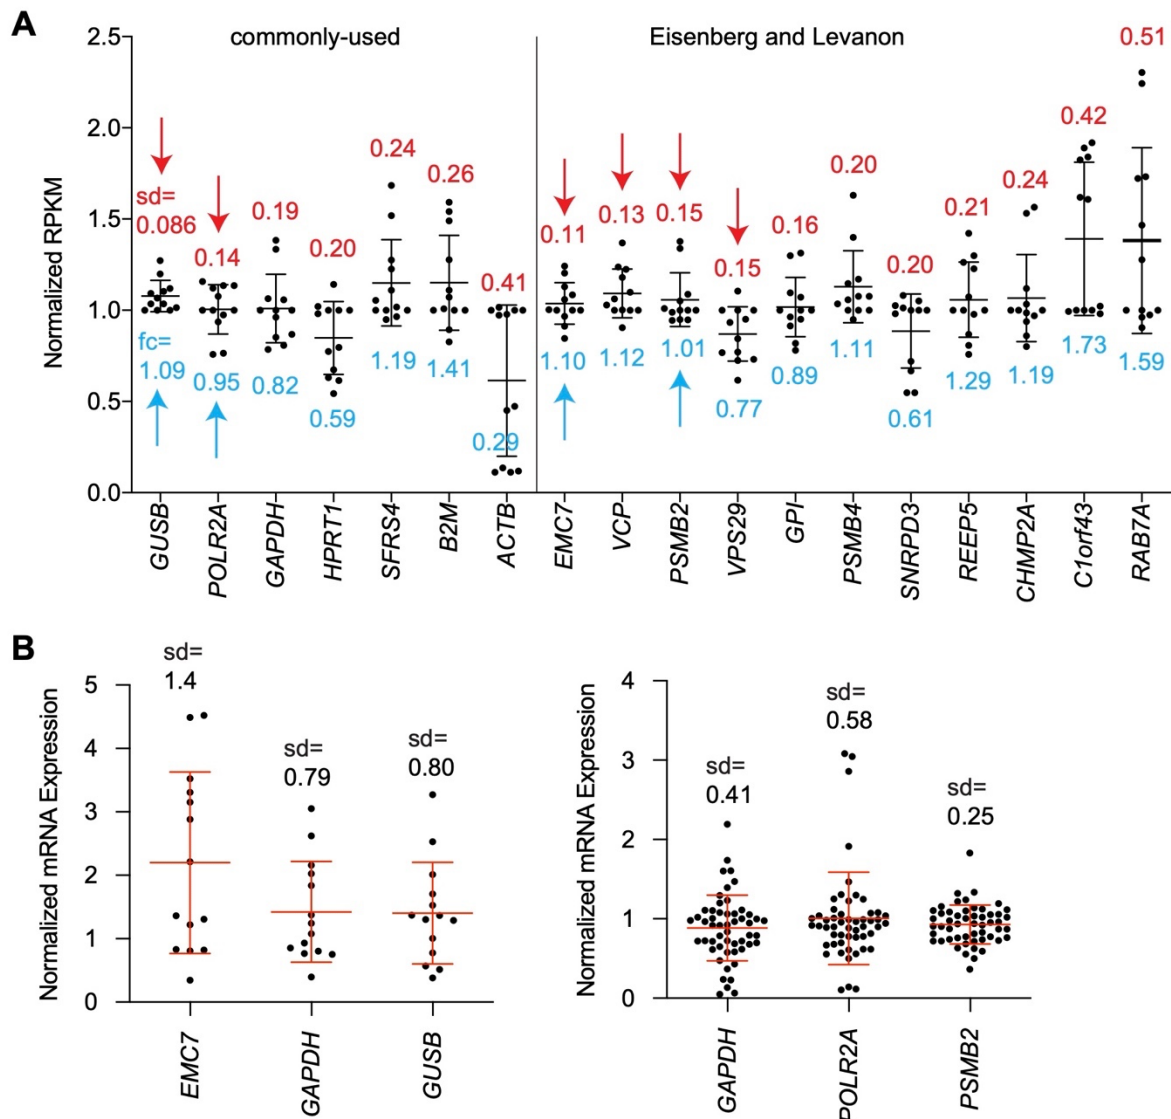

1203

1204 **Figure 1 – figure supplement 1. Selection of *PSMB2* as the reference mRNA for the**  
 1205 **qPCR-based secondary screening assay**

1206 **A.** Expression of house-keeping genes in HSCs was plotted by RPKM as previously quantified  
 1207 (Chen et al., 2017). Three pairs of samples were used in this analysis: ceramide treatment vs  
 1208 control, nortriptyline treatment vs control, nortriptyline treatment vs control in TGF- $\beta$  treated  
 1209 HSCs (Chen et al., 2017). Each dot represents the result from one sample, and bars represent  
 1210 mean  $\pm$  standard deviation (sd). The value of sd is indicated above each mRNA. The fold  
 1211 change (fc) of *EMC7*, *VCP*, *PSMB2* and *VPS29* in inactivated HSCs (ceramide or nortriptyline-  
 1212 treated) compared to corresponding control groups is indicated below the dots. Two groups of  
 1213 reference mRNAs were analyzed -- commonly used ones (left) and genes that are expressed  
 1214 uniformly across tissues (Eisenberg & Levanon, 2013). Red arrows indicate samples with sd  
 1215 of 0.15 or less. Blue arrows highlight the reference mRNAs with fold change of no more than  
 1216 10% in inactivated HSCs and were selected for further analysis. *GAPDH*, which is used  
 1217 routinely as a reference control was also included. **B.** Quantification of expression of *EMC7*,  
 1218 *GAPDH*, *GUSB*, *POLR2A*, and *PSMB2* from HSC cDNA samples (left: n=14, right: n=53) that  
 1219 were reverse transcribed from equal amounts of total input RNA. All samples were normalized  
 1220 to the mean value of its own control group before they were combined for each of the reference  
 1221 mRNAs. Each dot represents the result from one sample, and bars represent mean  $\pm$  standard  
 1222 deviation (sd) of all the tested samples. The value of sd is indicated above each mRNA.

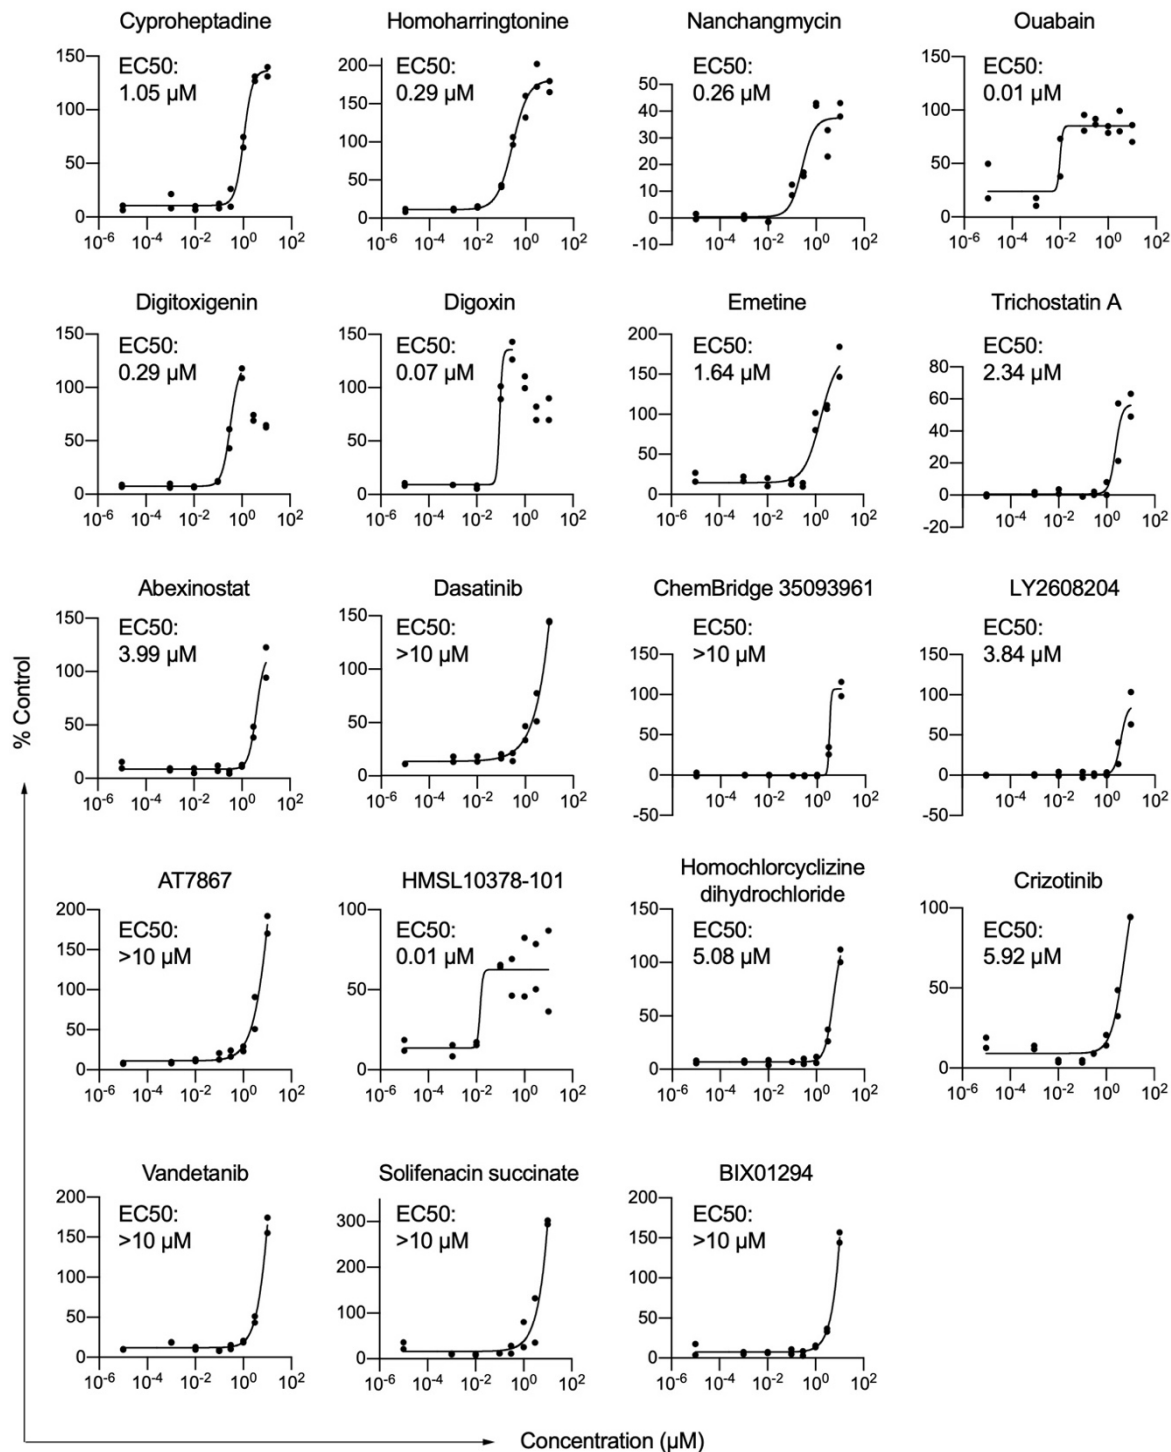

1223

1224 **Figure 1 – figure supplement 2. Nineteen compounds were identified to induce lipid**  
 1225 **accumulation in HSCs.**

1226 HSCs from human donor 2 were treated with compounds at indicated concentrations. Each  
 1227 dot represents one well ( $n=2$  technical replicates per concentration). Curves were generated  
 1228 by fitting the data into a sigmoidal equation. For digitoxigenin and digoxin, the highest two or  
 1229 three concentrations respectively were not used for fitting the curves due to the toxicity at  
 1230 these concentrations. If a compound was tested more than one time, only one representative  
 1231 curve is shown here, while the average score from all curves was used for ranking the  
 1232 compounds. Results from each individual experiment and data from all replicates are in  
 1233 Supplementary Table 6.

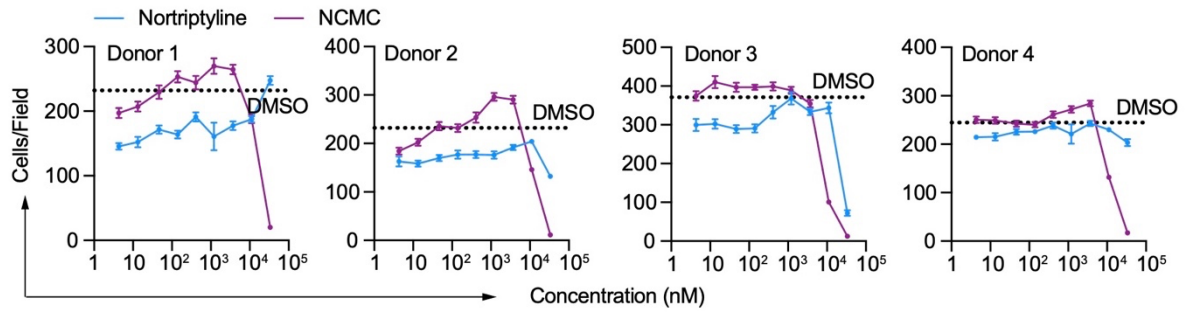

1234

1235 **Figure 2 – figure supplement 1. Effect of NCMC on cell number**

1236 Effects of NCMC (purple) and nortriptyline (blue) on cell numbers in HSCs isolated from four  
1237 different human donors at 48 hours. Dotted line represents the mean number of cells per  
1238 microscopic field in DMSO control wells. Error bars represent mean ± SEM (n=12). One  
1239 experiment was performed in each of the four donors.

1240

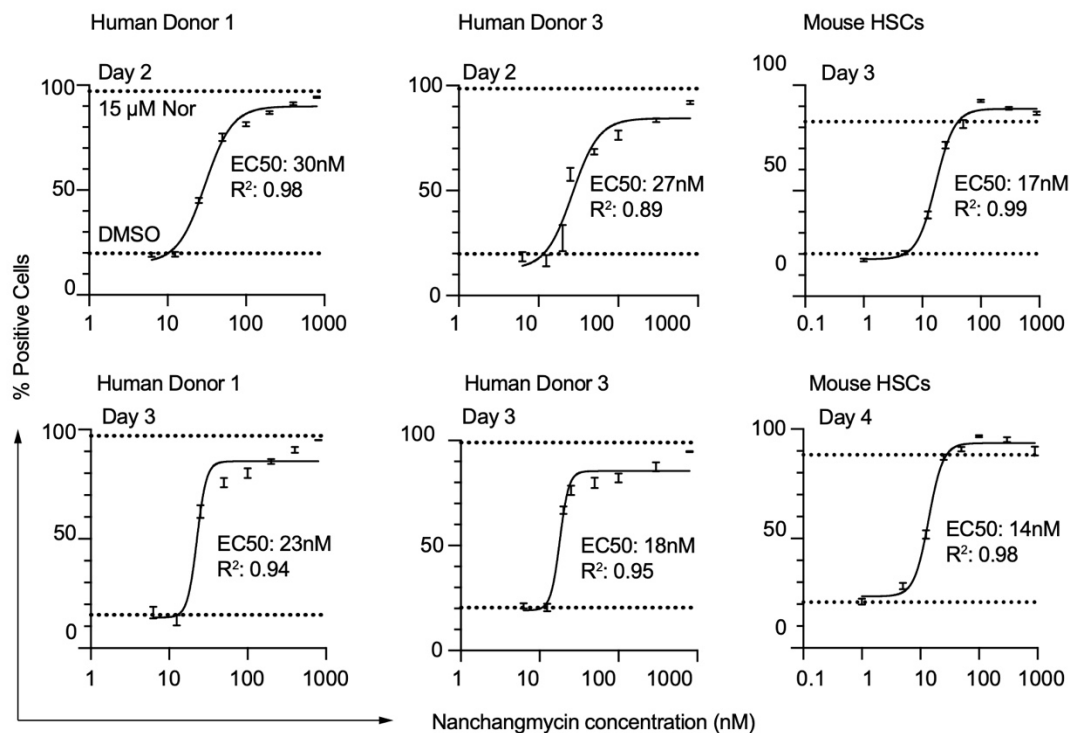

1241

1242 **Figure 2 – figure supplement 2. Dose response curves of NCMC treatment at different**  
1243 **time points in HSCs.**

1244 HSCs isolated from human donor 1 (left two panels), human donor 3 (middle two panels) and  
1245 mouse (right two panels) were used. Dotted line represents the mean percentage of Bodipy-  
1246 positive cells in DMSO negative control wells (lower) or nortriptyline positive control wells  
1247 (upper). Error bars represent mean  $\pm$  SEM (n=6). EC50 and R<sup>2</sup> are shown.  
1248



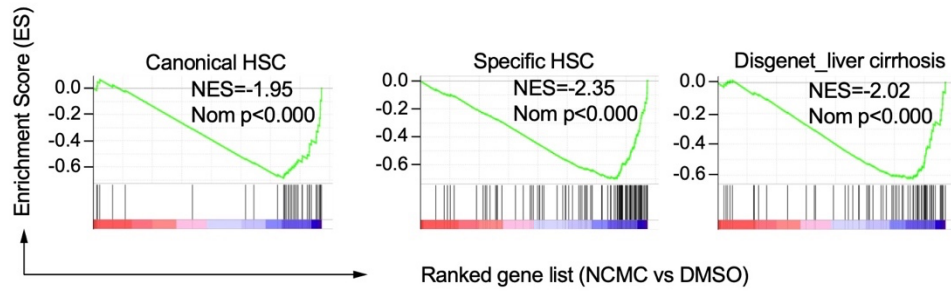

1249

1250 **Figure 3 – figure supplement 1. Gene set enrichment analysis results of HSC (Zhang et**  
1251 **al., 2016) and cirrhosis (Piñero et al., 2020) gene signatures**

1252 NES refers to Normalized Enrichment Score. Nom P refers to Nominal P value. Vertical black  
1253 lines refer to the gene hits in the indicated signatures. Red color indicates positively correlated,  
1254 and blue color indicates negatively correlated.

1255

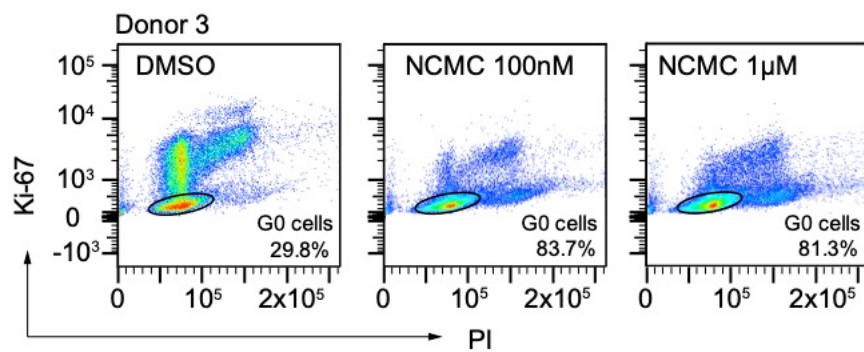

1256

1257 **Figure 4 – figure supplement 1. Flow cytometry analysis of Ki-67 and PI stained HSCs**  
1258 HSCs from human donor 3 were treated with DMSO or nanchangmycin (NCMC) for 24 hours  
1259 prior to flow cytometry analysis with Ki-67 and PI. Plots are representative of two independent  
1260 experiments.  
1261

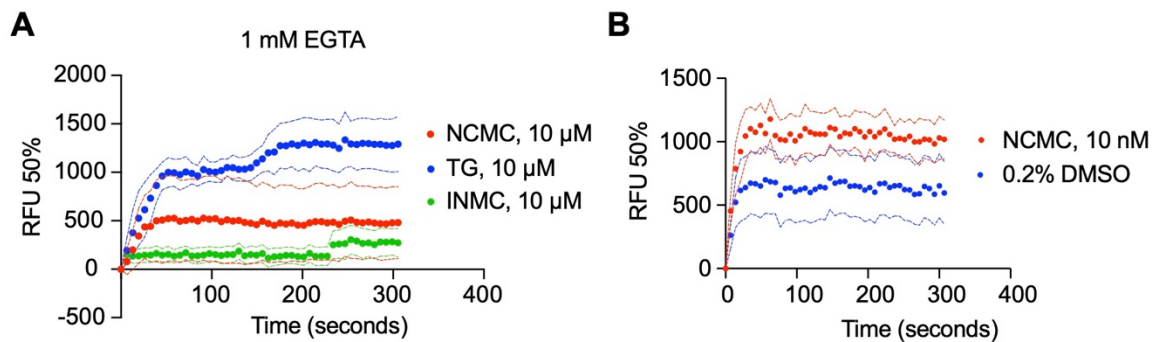

1262

1263 **Figure 4 – figure supplement 2. Measurement of cytosolic calcium level using fluo-4**  
1264 **NW**

1265 **A.** HSCs from donor 3 were pre-loaded with fluo-4 NW and fluorescent intensity was read  
1266 immediately after adding compounds in the presence of 1 mM EGTA (NCMC: nanchangmycin  
1267 (red), TG: thapsigargin (blue), INMC: ionomycin (green)). The plot demonstrates results from  
1268 three independent experiments. Solid dots represent mean, and dotted lines represent SEM  
1269 (n=3). RFU: Relative fluorescence unit. **B.** HSCs from donor 3 were pre-loaded with fluo-4 NW  
1270 and fluorescent intensity was read immediately after adding 0.2% DMSO or 10 nM NCMC  
1271 dissolved in DMSO (without EGTA). The plot demonstrates results from three independent  
1272 experiments. Solid dots represent mean, and dotted lines represent SEM (n=8 for DMSO, n=4  
1273 for NCMC). DMSO at 0.2% was selected as a negative control, as this was the highest  
1274 concentration of DMSO to which HSCs were exposed, as a solvent. NCMC, TG and INMC  
1275 were all dissolved in DMSO.

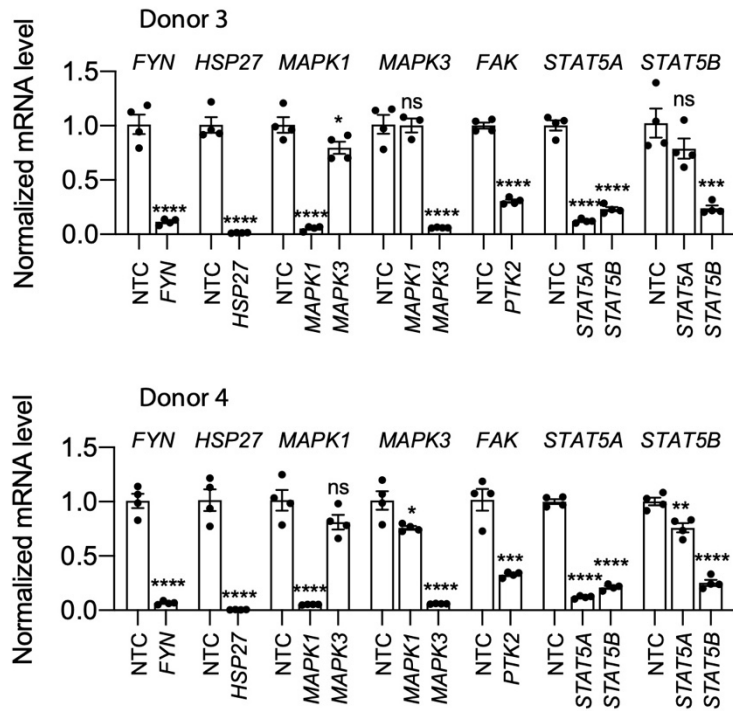

1276

1277 **Figure 5 – figure supplement 1. Knockdown efficiency of each siRNA pool in HSCs from**  
 1278 **human donor #3 (top) and donor #4 (bottom) compared to a non-targeting siRNA control**  
 1279 **(NTC)**

1280 Error bars represent mean  $\pm$  SEM (n=4). One experiment was performed for each donor  
 1281 shown. ns indicates not significant ( $p > 0.05$ ), \* indicates  $p < 0.05$ , \*\* indicates  $p < 0.01$ , \*\*\*  
 1282 indicates  $p < 0.001$ , and \*\*\*\* indicates  $p < 0.0001$  (one-way ANOVA test).

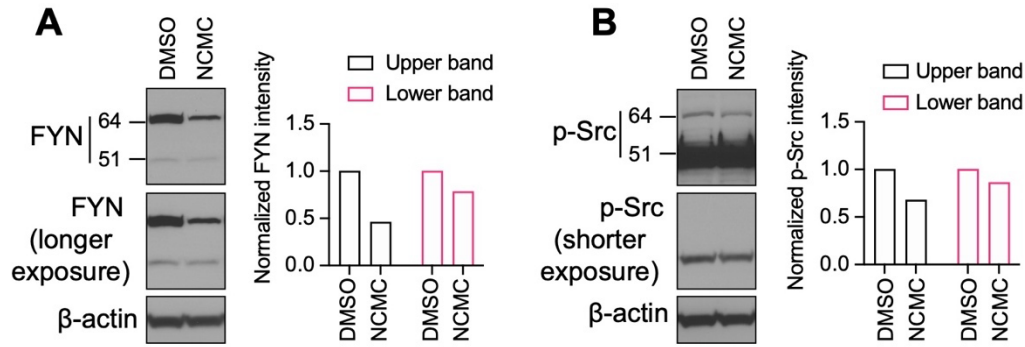

1283

1284 **Figure 6 – figure supplement 1. Western blot of HSCs treated with 1 $\mu$ M NCMC for 18**  
1285 **hours**

1286 The same samples were loaded for A and B on the same gel. The membrane was cut and  
1287 incubated with FYN and p-Src family antibodies separately. Bands were detected for FYN at  
1288 64 kilodaltons (kD) (Upper band) and 51 kD (Lower band). Two different exposure times are  
1289 shown for FYN in (A) and p-Src (B) to evaluate both bands.  $\beta$ -actin is used as a loading control.  
1290 (Data are representative of three independent experiments).  
1291

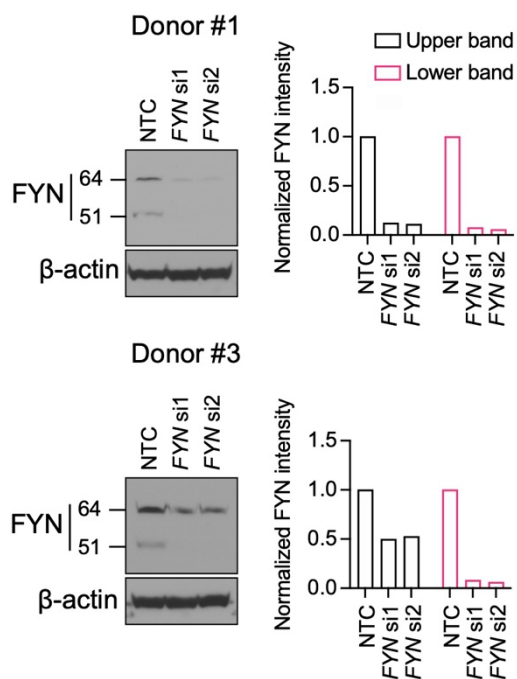

1292

1293 **Figure 6 – figure supplement 2. Western blot for FYN**

1294 HSCs were transfected with siRNAs targeting *FYN* (si1 and si2) and a non-targeting siRNA  
1295 control (NTC). Western blot was performed on day 3 (representative of two independent  
1296 experiments).

1297

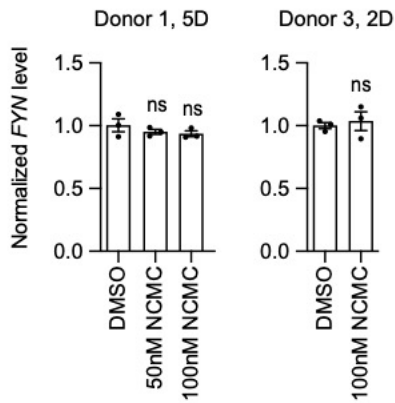

1298

1299 **Figure 6 – figure supplement 3. *FYN* mRNA level was not affected by NCMC treatment**

1300 HSCs were treated with NCMC for indicated number of days (D). *FYN* level was analyzed by

1301 qPCR. Error bars represent mean ± SEM (n=3). Data are representative of two independent

1302 experiments. ns indicates not significant ( $p > 0.05$ ) by one-way ANOVA for donor 1 and

1303 Student's t-test for donor 3.

1304

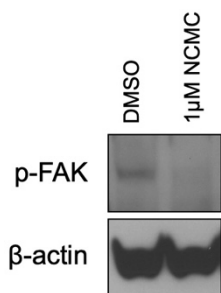

1305

1306 **Figure 6 – figure supplement 4. NCMC decreases FAK phosphorylation**

1307 Western blot of HSCs treated with DMSO control or 1 μM NCMC for 18 hours. β-actin is used  
1308 as a loading control (representative of three experiments).

1309



1310 **List of supplementary tables**

1311 Supplementary Table 1\_Small-molecule Compound Libraries

1312 Supplementary Table 2\_Primary Screen Results

1313 Supplementary Table 3\_711 Hits from Primary Screen

1314 Supplementary Table 4\_Clustering of Primary Screen Candidates

1315 Supplementary Table 5\_Secondary Screen Results

1316 Supplementary Table 6\_DRC Screen Results

1317 Supplementary Table 7\_GSEA of Ontology Gene Sets

1318 Supplementary Table 8\_HSC and Liver Cirrhosis Gene Signatures

1319
