# Supplementary material for: Nanchangmycin regulates FYN, FAK and ERK to control the fibrotic activity of hepatic stellate cells
Source: bioRxiv preprint, doi:10.1101/2021.10.08.463221, version 1 (2021-10-09)
Supplement: Supplementary Table 2 [file 463221_file04.xlsx]

## Sheet: Data
Well ID	Plate	Well	Library	Reagent Vendor	Vendor Reagent ID	Compound Name(s)	Molar Concentration	Cell_A	Cell_B	% Pos_A	% Pos_B	Weight	Toxicity	Score	Norm	Scaled	Positive hit
01920:A03	1920	A03	NINDS2	NINDS	1500101	Acetaminophen	10 mM	440	546	5.455	14.469	0.998	0	0	-0.674	0	false
01920:A04	1920	A04	NINDS2	NINDS	1500201	Cloxacillin sodium	10 mM	409	436	9.78	10.55	0.866	3.264	0	-0.674	0	false
01920:A05	1920	A05	NINDS2	NINDS	1500102	Acetazolamide	10 mM	502	469	10.558	12.367	0.99	0	0	-0.674	0	false
01920:A06	1920	A06	NINDS2	NINDS	1500202	Cloxyquin	10 mM	432	482	9.954	7.469	2.986	0.636	0	-0.674	0	false
01920:A07	1920	A07	NINDS2	NINDS	1500103	Acetohydroxamic acid	10 mM	480	503	7.5	12.326	1.147	0	0	-0.674	0	false
01920:A08	1920	A08	NINDS2	NINDS	1500205	Colchicine	10 mM	394	446	48.731	52.466	56.433	4.978	50.454	4.813	0.49	false
01920:A09	1920	A09	NINDS2	NINDS	1500104	Acetylcholine	10 mM	480	478	15.208	11.506	3.568	0	0	-0.674	0	false
01920:A10	1920	A10	NINDS2	NINDS	1500206	Colistimethate sodium	10 mM	479	465	15.24	10.753	3.042	0	0	-0.674	0	false
01920:A11	1920	A11	NINDS2	NINDS	1500105	Acetylcysteine	10 mM	441	462	7.029	14.286	0.046	0	0	-0.674	0	false
01920:A12	1920	A12	NINDS2	NINDS	1500207	Cortisone acetate	10 mM	491	432	5.295	8.565	5.399	0	2.576	-0.394	0.025	false
01920:A13	1920	A13	NINDS2	NINDS	1500107	Adenosine	10 mM	390	480	7.949	7.5	4.345	5.435	0	-0.674	0	false
01920:A14	1920	A14	NINDS2	NINDS	1500208	Cotinine	10 mM	403	472	5.459	10.805	3.658	3.949	0	-0.674	0	false
01920:A15	1920	A15	NINDS2	NINDS	1500108	Allopurinol	10 mM	464	476	7.759	10.084	2.598	0	0.798	-0.588	0.008	false
01920:A16	1920	A16	NINDS2	NINDS	1500209	Cresol	10 mM	469	506	5.33	5.929	7.291	0	7.001	0.087	0.068	false
01920:A17	1920	A17	NINDS2	NINDS	1500109	Alverine citrate	10 mM	495	503	41.01	50.099	49.393	0	42.915	3.993	0.417	false
01920:A18	1920	A18	NINDS2	NINDS	1500210	Cromolyn sodium	10 mM	481	516	11.227	11.24	0.632	0	0.06	-0.668	0.001	false
01920:A19	1920	A19	NINDS2	NINDS	1500110	Amantadine hydrochloride	10 mM	565	513	33.097	48.733	42.949	0	29.853	2.573	0.29	false
01920:A20	1920	A20	NINDS2	NINDS	1500211	Cyclizine	10 mM	495	543	49.091	50.276	55.089	0	53.654	5.161	0.521	false
01920:A21	1920	A21	NINDS2	NINDS	1500111	Amikacin sulfate	10 mM	464	521	21.767	14.395	10.187	0	2.065	-0.45	0.02	false
01920:A22	1920	A22	NINDS2	NINDS	1500212	Cyclopentolate hydrochloride	10 mM	446	476	23.094	24.79	18.656	0	18.252	1.311	0.177	false
01920:B03	1920	B03	NINDS2	NINDS	1500310	Furosemide	10 mM	372	401	17.204	12.718	5.824	9.367	0	-0.674	0	false
01920:B04	1920	B04	NINDS2	NINDS	1500434	Nitrofurazone	10 mM	386	391	10.363	21.483	7.481	8.967	0	-0.674	0	false
01920:B05	1920	B05	NINDS2	NINDS	1500311	Fusidic acid	10 mM	393	429	11.705	13.287	2.449	5.092	0	-0.674	0	false
01920:B06	1920	B06	NINDS2	NINDS	1500435	Nitromide	10 mM	406	431	16.995	12.993	5.88	3.607	0	-0.674	0	false
01920:B07	1920	B07	NINDS2	NINDS	1500313	Gemfibrozil	10 mM	424	442	12.028	19.91	7.485	1.55	0	-0.674	0	false
01920:B08	1920	B08	NINDS2	NINDS	1500436	Norepinephrine	10 mM	404	415	13.861	12.048	3.034	4.03	0	-0.674	0	false
01920:B09	1920	B09	NINDS2	NINDS	1500314	Gentamicin sulfate	10 mM	381	445	16.535	17.753	9.022	6.463	2.267	-0.428	0.022	false
01920:B10	1920	B10	NINDS2	NINDS	1500437	Norethindrone	10 mM	395	414	9.873	13.043	1.01	5.179	0	-0.674	0	false
01920:B11	1920	B11	NINDS2	NINDS	1500315	Gentian violet	10 mM	422	374	12.085	27.273	12.876	6.894	0	-0.674	0	false
01920:B12	1920	B12	NINDS2	NINDS	1500438	Norethindrone acetate	10 mM	421	476	10.926	10.504	0.11	1.893	0	-0.674	0	false
01920:B13	1920	B13	NINDS2	NINDS	1500316	Glucosamine hydrochloride	10 mM	401	453	17.706	16.998	9.28	4.178	3.508	-0.293	0.034	false
01920:B14	1920	B14	NINDS2	NINDS	1500439	Norethynodrel	10 mM	394	416	12.183	16.587	5.176	5.053	0	-0.674	0	false
01920:B15	1920	B15	NINDS2	NINDS	1500321	Guaifenesin	10 mM	454	428	8.37	12.617	0.336	0	0	-0.674	0	false
01920:B16	1920	B16	NINDS2	NINDS	1500440	Norfloxacin	10 mM	440	410	7.273	11.22	2.107	0.795	0	-0.674	0	false
01920:B17	1920	B17	NINDS2	NINDS	1500322	Guanabenz acetate	10 mM	440	429	40.909	44.988	45.609	0	43.874	4.098	0.426	false
01920:B18	1920	B18	NINDS2	NINDS	1500441	Norgestrel	10 mM	468	449	12.821	14.922	4.406	0	3.082	-0.339	0.03	false
01920:B19	1920	B19	NINDS2	NINDS	1500323	Guanethidine sulfate	10 mM	420	426	11.19	10.563	0.115	2.007	0	-0.674	0	false
01920:B20	1920	B20	NINDS2	NINDS	1500442	Nortriptyline	10 mM	474	461	62.447	72.451	80.407	0	74.179	7.394	0.72	false
01920:B21	1920	B21	NINDS2	NINDS	1500324	Halazone	10 mM	390	399	12.051	14.286	3.413	7.55	0	-0.674	0	false
01920:B22	1920	B22	NINDS2	NINDS	1500443	Noscapine hydrochloride	10 mM	463	456	14.471	12.5	3.782	0	1.16	-0.548	0.011	false
01920:C03	1920	C03	NINDS2	NINDS	1500112	Amiloride hydrochloride	10 mM	325	348	8.615	10.345	1.818	21.098	0	-0.674	0	false
01920:C04	1920	C04	NINDS2	NINDS	1500213	Cyclophosphamide hydrate	10 mM	435	364	11.954	7.143	1.845	6.608	0	-0.674	0	false
01920:C05	1920	C05	NINDS2	NINDS	1500113	Potassium p-aminobenzoate	10 mM	441	350	11.111	8	1.803	7.996	0	-0.674	0	false
01920:C06	1920	C06	NINDS2	NINDS	1500215	Cycloserine	10 mM	395	445	17.215	31.461	19.454	4.864	1.984	-0.459	0.019	false
01920:C07	1920	C07	NINDS2	NINDS	1500114	6-aminocaproic acid	10 mM	499	491	11.022	8.35	1.61	0	0	-0.674	0	false
01920:C08	1920	C08	NINDS2	NINDS	1500216	Cyproterone acetate	10 mM	412	416	12.136	16.587	5.144	2.996	0	-0.674	0	false
01920:C09	1920	C09	NINDS2	NINDS	1500115	Aminoglutethimide	10 mM	386	424	13.731	21.462	9.786	5.892	0	-0.674	0	false
01920:C10	1920	C10	NINDS2	NINDS	1500217	Cytarabine	10 mM	364	357	14.56	10.644	2.495	15.562	0	-0.674	0	false
01920:C11	1920	C11	NINDS2	NINDS	1500116	Aminosalicylate sodium	10 mM	364	430	10.44	6.744	3.178	8.406	0	-0.674	0	false
01920:C12	1920	C12	NINDS2	NINDS	1500220	Danazol	10 mM	394	413	14.467	12.833	4.022	5.413	0	-0.674	0	false
01920:C13	1920	C13	NINDS2	NINDS	1500117	Amitriptyline hydrochloride	10 mM	418	446	55.502	65.471	70.55	2.235	61.758	6.043	0.6	false
01920:C14	1920	C14	NINDS2	NINDS	1500222	Dapsone	10 mM	378	409	10.847	8.313	1.758	7.721	0	-0.674	0	false
01920:C15	1920	C15	NINDS2	NINDS	1500119	Amodiaquine dihydrochloride	10 mM	441	409	83.673	92.91	109.9	0.915	104.591	10.702	1.016	true
01920:C16	1920	C16	NINDS2	NINDS	1500224	Deferoxamine mesylate	10 mM	404	427	7.921	10.07	2.496	3.835	0	-0.674	0	false
01920:C17	1920	C17	NINDS2	NINDS	1500120	Amoxicillin	10 mM	408	420	10.539	10.952	0.051	3.378	0	-0.674	0	false
01920:C18	1920	C18	NINDS2	NINDS	1500225	Sodium dehydrocholate	10 mM	444	450	10.811	10	0.556	0	0	-0.674	0	false
01920:C19	1920	C19	NINDS2	NINDS	1500122	Amphotericin b	10 mM	422	422	10.427	13.033	1.384	1.778	0	-0.674	0	false
01920:C20	1920	C20	NINDS2	NINDS	1500226	Demeclocycline hydrochloride	10 mM	425	392	11.294	7.908	1.744	4.391	0	-0.674	0	false
01920:C21	1920	C21	NINDS2	NINDS	1500123	Ampicillin sodium	10 mM	396	446	11.616	16.368	4.627	4.749	0	-0.674	0	false
01920:C22	1920	C22	NINDS2	NINDS	1500227	Desipramine hydrochloride	10 mM	437	425	58.81	69.412	75.693	0.064	68.644	6.792	0.667	false
01920:D03	1920	D03	NINDS2	NINDS	1500325	Haloperidol	10 mM	399	358	44.361	42.458	46.148	11.442	30.59	2.653	0.297	false
01920:D04	1920	D04	NINDS2	NINDS	1500444	Novobiocin sodium	10 mM	366	400	26.23	15.75	14.245	10.173	0	-0.674	0	false
01920:D05	1920	D05	NINDS2	NINDS	1500327	Hetacillin potassium	10 mM	380	390	15	15.128	6.057	9.773	0	-0.674	0	false
01920:D06	1920	D06	NINDS2	NINDS	1500445	Nylidrin hydrochloride	10 mM	368	415	41.848	39.518	42.28	8.144	29.747	2.561	0.289	false
01920:D07	1920	D07	NINDS2	NINDS	1500328	Hexachlorophene	10 mM	419	430	28.878	46.047	38.09	2.121	21.2	1.631	0.206	false
01920:D08	1920	D08	NINDS2	NINDS	1500446	Nystatin	10 mM	384	399	14.323	17.794	7.528	8.236	0	-0.674	0	false
01920:D09	1920	D09	NINDS2	NINDS	1500330	Hexylresorcinol	10 mM	397	404	23.678	20.545	15.972	6.15	5.618	-0.063	0.055	false
01920:D10	1920	D10	NINDS2	NINDS	1500447	Orphenadrine citrate	10 mM	374	378	48.396	59.524	61.331	11.899	41.407	3.829	0.402	false
01920:D11	1920	D11	NINDS2	NINDS	1500331	Histamine dihydrochloride	10 mM	392	414	19.388	25.121	16.343	5.521	6.397	0.021	0.062	false
01920:D12	1920	D12	NINDS2	NINDS	1500448	Oxacillin sodium	10 mM	398	388	8.543	12.113	0.583	7.956	0	-0.674	0	false
01920:D13	1920	D13	NINDS2	NINDS	1500332	Homatropine bromide	10 mM	348	400	20.115	12.5	7.671	12.229	0	-0.674	0	false
01920:D14	1920	D14	NINDS2	NINDS	1500450	Oxidopamine hydrochloride	10 mM	387	341	11.37	6.452	2.75	14.854	0	-0.674	0	false
01920:D15	1920	D15	NINDS2	NINDS	1500333	Homatropine methylbromide	10 mM	357	416	21.008	21.875	15.1	9.281	5.546	-0.071	0.054	false
01920:D16	1920	D16	NINDS2	NINDS	1500451	Oxybenzone	10 mM	383	431	15.927	17.633	8.516	6.235	1.494	-0.512	0.015	false
01920:D17	1920	D17	NINDS2	NINDS	1500334	Hydralazine hydrochloride	10 mM	421	458	15.439	12.882	4.727	1.893	0	-0.674	0	false
01920:D18	1920	D18	NINDS2	NINDS	1500453	Oxymetazoline hydrochloride	10 mM	377	444	49.072	47.072	52.747	6.92	41.374	3.826	0.402	false
01920:D19	1920	D19	NINDS2	NINDS	1500335	Hydrochlorothiazide	10 mM	454	414	11.894	23.188	9.776	0.315	0	-0.674	0	false
01920:D20	1920	D20	NINDS2	NINDS	1500455	Oxyphenbutazone	10 mM	393	414	12.468	14.01	3.5	5.407	0	-0.674	0	false
01920:D21	1920	D21	NINDS2	NINDS	1500338	Hydrocortisone acetate	10 mM	385	381	8.052	9.711	2.667	10.282	0	-0.674	0	false
01920:D22	1920	D22	NINDS2	NINDS	1500456	Oxyquinoline hemisulfate	10 mM	389	446	18.252	13.453	7.08	5.549	0	-0.674	0	false
01920:E03	1920	E03	NINDS2	NINDS	1500124	Amprolium	10 mM	348	400	8.908	8.5	2.957	12.229	0	-0.674	0	false
01920:E04	1920	E04	NINDS2	NINDS	1500230	Dexamethasone	10 mM	328	347	6.402	6.052	6.463	20.875	0	-0.674	0	false
01920:E05	1920	E05	NINDS2	NINDS	1500126	Antazoline phosphate	10 mM	338	387	44.675	35.142	41.047	14.932	14.751	0.93	0.143	false
01920:E06	1920	E06	NINDS2	NINDS	1500231	Dexamethasone acetate	10 mM	300	381	9	9.449	2.204	19.995	0	-0.674	0	false
01920:E07	1920	E07	NINDS2	NINDS	1500127	Anthralin	10 mM	402	358	27.861	27.374	23.818	11.099	10.805	0.501	0.105	false
01920:E08	1920	E08	NINDS2	NINDS	1500232	Dexamethasone sodium phosphate	10 mM	344	368	9.884	10.326	0.958	16.527	0	-0.674	0	false
01920:E09	1920	E09	NINDS2	NINDS	1500128	Antipyrine	10 mM	355	385	10.704	11.948	0.786	13.23	0	-0.674	0	false
01920:E10	1920	E10	NINDS2	NINDS	1500233	Dextromethorphan hydrobromide	10 mM	331	328	36.254	35.976	35.851	22.813	10.885	0.509	0.106	false
01920:E11	1920	E11	NINDS2	NINDS	1500129	Apomorphine hydrochloride	10 mM	328	399	13.11	19.549	7.968	14.635	0	-0.674	0	false
01920:E12	1920	E12	NINDS2	NINDS	1500235	Dibenzothiophene	10 mM	376	380	9.309	8.684	2.547	11.43	0	-0.674	0	false
01920:E13	1920	E13	NINDS2	NINDS	1500130	Aspirin	10 mM	340	361	11.176	9.695	0.526	17.824	0	-0.674	0	false
01920:E14	1920	E14	NINDS2	NINDS	1500236	Dibucaine hydrochloride	10 mM	369	338	20.596	23.077	15.69	17.271	0	-0.674	0	false
01920:E15	1920	E15	NINDS2	NINDS	1500131	Atropine sulfate	10 mM	387	408	15.762	9.069	2.178	6.813	0	-0.674	0	false
01920:E16	1920	E16	NINDS2	NINDS	1500237	Diclofenac sodium	10 mM	408	380	12.745	11.053	1.541	7.774	0	-0.674	0	false
01920:E17	1920	E17	NINDS2	NINDS	1500133	Azathioprine	10 mM	388	422	12.629	9.716	0.49	5.663	0	-0.674	0	false
01920:E18	1920	E18	NINDS2	NINDS	1500238	Dicloxacillin sodium	10 mM	420	420	9.286	9.524	1.953	2.007	0	-0.674	0	false
01920:E19	1920	E19	NINDS2	NINDS	1500134	Bacitracin	10 mM	406	382	11.576	15.445	3.929	7.762	0	-0.674	0	false
01920:E20	1920	E20	NINDS2	NINDS	1500239	Dicumarol	10 mM	438	436	11.644	5.963	2.916	0	0	-0.674	0	false
01920:E21	1920	E21	NINDS2	NINDS	1500135	Baclofen	10 mM	393	407	9.16	32.678	14.789	6.247	0	-0.674	0	false
01920:E22	1920	E22	NINDS2	NINDS	1500240	Dicyclomine hydrochloride	10 mM	430	416	40.698	57.692	54.697	0.939	39.77	3.651	0.386	false
01920:F03	1920	F03	NINDS2	NINDS	1500339	Hydrocortisone hemisuccinate	10 mM	385	379	11.688	8.707	0.891	10.522	0	-0.674	0	false
01920:F04	1920	F04	NINDS2	NINDS	1500457	Oxytetracycline	10 mM	350	327	14.857	8.869	1.409	20.762	0	-0.674	0	false
01920:F05	1920	F05	NINDS2	NINDS	1500341	Hydroflumethiazide	10 mM	361	323	19.945	20.124	13.094	19.985	0	-0.674	0	false
01920:F06	1920	F06	NINDS2	NINDS	1500459	Papaverine hydrochloride	10 mM	384	353	24.219	18.13	14.59	13.756	0	-0.674	0	false
01920:F07	1920	F07	NINDS2	NINDS	1500343	Hydroxyprogesterone caproate	10 mM	361	375	24.377	21.6	17.221	13.744	0	-0.674	0	false
01920:F08	1920	F08	NINDS2	NINDS	1500460	Parachlorophenol	10 mM	401	358	16.708	16.201	8.014	11.214	0	-0.674	0	false
01920:F09	1920	F09	NINDS2	NINDS	1500344	Hydroxyurea	10 mM	417	383	29.976	13.577	15.247	6.385	0	-0.674	0	false
01920:F10	1920	F10	NINDS2	NINDS	1500464	Penicillamine	10 mM	370	355	23.514	14.085	11.164	15.116	0	-0.674	0	false
01920:F11	1920	F11	NINDS2	NINDS	1500345	Hydroxyzine pamoate	10 mM	316	367	57.278	40.327	53.498	19.846	14.599	0.913	0.142	false
01920:F12	1920	F12	NINDS2	NINDS	1500465	Benzyl penicillin potassium	10 mM	383	347	30.026	8.069	11.278	14.591	0	-0.674	0	false
01920:F13	1920	F13	NINDS2	NINDS	1500346	Hyoscyamine	10 mM	377	387	16.18	13.953	6.016	10.476	0	-0.674	0	false
01920:F14	1920	F14	NINDS2	NINDS	1500467	Penicillin v potassium	10 mM	372	356	16.398	15.449	7.254	14.768	0	-0.674	0	false
01920:F15	1920	F15	NINDS2	NINDS	1500347	Ibuprofen	10 mM	387	329	9.819	10.942	0.555	16.294	0	-0.674	0	false
01920:F16	1920	F16	NINDS2	NINDS	1500472	Phenacemide	10 mM	402	398	12.687	11.055	1.503	6.299	0	-0.674	0	false
01920:F17	1920	F17	NINDS2	NINDS	1500348	Imipramine hydrochloride	10 mM	396	405	68.182	61.728	76.565	6.144	60.75	5.933	0.59	false
01920:F18	1920	F18	NINDS2	NINDS	1500473	Phenazopyridine hydrochloride	10 mM	414	385	12.802	7.532	0.978	6.488	0	-0.674	0	false
01920:F19	1920	F19	NINDS2	NINDS	1500349	Indapamide	10 mM	440	418	14.773	18.66	8.468	0	5.553	-0.071	0.054	false
01920:F20	1920	F20	NINDS2	NINDS	1500477	Phenindione	10 mM	370	401	22.703	11.721	8.887	9.596	0	-0.674	0	false
01920:F21	1920	F21	NINDS2	NINDS	1500350	Indomethacin	10 mM	394	415	9.137	6.988	3.898	5.173	0	-0.674	0	false
01920:F22	1920	F22	NINDS2	NINDS	1500478	Pheniramine maleate	10 mM	441	426	15.42	15.728	6.782	0	6.27	0.008	0.061	false
01920:G03	1920	G03	NINDS2	NINDS	1500136	Beclomethasone dipropionate	10 mM	380	385	8.158	15.065	1.297	10.373	0	-0.674	0	false
01920:G04	1920	G04	NINDS2	NINDS	1500241	Dienestrol	10 mM	367	355	12.262	7.887	1.092	15.459	0	-0.674	0	false
01920:G05	1920	G05	NINDS2	NINDS	1500137	Benserazide hydrochloride	10 mM	357	358	7.283	5.307	6.397	16.242	0	-0.674	0	false
01920:G06	1920	G06	NINDS2	NINDS	1500242	Diethylcarbamazine citrate	10 mM	374	391	17.647	11.765	5.436	10.339	0	-0.674	0	false
01920:G07	1920	G07	NINDS2	NINDS	1500138	Benzethonium chloride	10 mM	394	352	42.64	36.364	40.533	12.734	19.628	1.46	0.191	false
01920:G08	1920	G08	NINDS2	NINDS	1500244	Diethylstilbestrol	10 mM	369	419	13.55	14.32	4.471	7.835	0	-0.674	0	false
01920:G09	1920	G09	NINDS2	NINDS	1500139	Benzocaine	10 mM	350	370	10.286	15.405	3.011	15.601	0	-0.674	0	false
01920:G10	1920	G10	NINDS2	NINDS	1500245	Diflunisal	10 mM	366	350	16.12	8.857	2.271	16.173	0	-0.674	0	false
01920:G11	1920	G11	NINDS2	NINDS	1500141	Benzthiazide	10 mM	382	402	10.733	12.935	1.524	8.104	0	-0.674	0	false
01920:G12	1920	G12	NINDS2	NINDS	1500246	Digitoxin	10 mM	421	414	52.019	53.623	59.539	2.208	56.141	5.432	0.545	false
01920:G13	1920	G13	NINDS2	NINDS	1500142	Benztropine	10 mM	382	410	55.497	47.073	57.175	7.144	39.153	3.584	0.38	false
01920:G14	1920	G14	NINDS2	NINDS	1500247	Digoxin	10 mM	396	424	71.97	79.009	91.734	4.749	84.063	8.469	0.816	false
01920:G15	1920	G15	NINDS2	NINDS	1500144	Betamethasone	10 mM	371	405	6.739	10.617	2.913	9.001	0	-0.674	0	false
01920:G16	1920	G16	NINDS2	NINDS	1500248	Dihydroergotamine mesylate	10 mM	389	424	29.82	27.83	25.499	5.549	16.509	1.121	0.16	false
01920:G17	1920	G17	NINDS2	NINDS	1500145	Betamethasone valerate	10 mM	387	379	9.819	20.317	6.259	10.293	0	-0.674	0	false
01920:G18	1920	G18	NINDS2	NINDS	1500249	Dihydrostreptomycin sulfate	10 mM	370	410	5.676	9.024	4.803	8.515	0	-0.674	0	false
01920:G19	1920	G19	NINDS2	NINDS	1500146	Bethanechol chloride	10 mM	399	410	9.774	12.683	0.68	5.202	0	-0.674	0	false
01920:G20	1920	G20	NINDS2	NINDS	1500251	Dimenhydrinate	10 mM	391	388	12.788	18.814	7.212	8.756	0	-0.674	0	false
01920:G21	1920	G21	NINDS2	NINDS	1500147	Bisacodyl	10 mM	409	417	4.156	9.113	5.785	3.264	0	-0.674	0	false
01920:G22	1920	G22	NINDS2	NINDS	1500253	Dimethadione	10 mM	448	431	10.268	11.137	0.104	0	0	-0.674	0	false
01920:H03	1920	H03	NINDS2	NINDS	1500351	Indoprofen	10 mM	417	394	13.429	20.051	8.553	5.065	0	-0.674	0	false
01920:H04	1920	H04	NINDS2	NINDS	1500480	Phenolphthalein	10 mM	386	404	9.845	12.871	0.865	7.407	0	-0.674	0	false
01920:H05	1920	H05	NINDS2	NINDS	1500353	Iodoquinol	10 mM	352	369	8.523	14.363	1.039	15.493	0	-0.674	0	false
01920:H06	1920	H06	NINDS2	NINDS	1500482	Phenylbutazone	10 mM	392	374	12.245	12.834	2.492	10.322	0	-0.674	0	false
01920:H07	1920	H07	NINDS2	NINDS	1500354	Ipratropium bromide	10 mM	392	375	24.235	14.667	12.084	10.202	0	-0.674	0	false
01920:H08	1920	H08	NINDS2	NINDS	1500483	Phenylephrine hydrochloride	10 mM	372	377	29.032	25.464	23.237	12.247	6.094	-0.012	0.059	false
01920:H09	1920	H09	NINDS2	NINDS	1500355	Isoniazid	10 mM	367	406	22.343	11.33	8.356	9.338	0	-0.674	0	false
01920:H10	1920	H10	NINDS2	NINDS	1500485	Phenytoin sodium	10 mM	383	380	17.755	19.211	10.922	10.63	0	-0.674	0	false
01920:H11	1920	H11	NINDS2	NINDS	1500356	Isopropamide iodide	10 mM	385	396	17.922	15.909	8.638	8.482	0	-0.674	0	false
01920:H12	1920	H12	NINDS2	NINDS	1500486	Physostigmine salicylate	10 mM	369	365	15.447	26.301	14.486	14.03	0	-0.674	0	false
01920:H13	1920	H13	NINDS2	NINDS	1500357	Isoproterenol hydrochloride	10 mM	364	376	10.165	15.957	3.329	13.281	0	-0.674	0	false
01920:H14	1920	H14	NINDS2	NINDS	1500487	Pilocarpine nitrate	10 mM	372	358	24.731	16.201	13.541	14.527	0	-0.674	0	false
01920:H15	1920	H15	NINDS2	NINDS	1500358	Isosorbide dinitrate	10 mM	370	395	21.351	10.633	7.165	10.316	0	-0.674	0	false
01920:H16	1920	H16	NINDS2	NINDS	1500488	Pindolol	10 mM	400	387	13	14.47	4.201	7.848	0	-0.674	0	false
01920:H17	1920	H17	NINDS2	NINDS	1500359	Isoxsuprine hydrochloride	10 mM	399	356	46.617	39.326	45.426	11.682	24.403	1.98	0.237	false
01920:H18	1920	H18	NINDS2	NINDS	1500489	Piperacillin sodium	10 mM	396	392	14.394	21.429	10.219	7.705	0	-0.674	0	false
01920:H19	1920	H19	NINDS2	NINDS	1500360	Kanamycin a sulfate	10 mM	418	413	19.617	14.286	8.626	2.67	0	-0.674	0	false
01920:H20	1920	H20	NINDS2	NINDS	1500490	Piperazine	10 mM	390	417	10.513	9.592	1.058	5.435	0	-0.674	0	false
01920:H21	1920	H21	NINDS2	NINDS	1500362	Ketoconazole	10 mM	372	388	20.968	39.175	27.646	10.927	0.553	-0.614	0.005	false
01920:H22	1920	H22	NINDS2	NINDS	1500491	Piroxicam	10 mM	392	419	9.439	11.456	0.443	5.206	0	-0.674	0	false
01920:I03	1920	I03	NINDS2	NINDS	1500148	Bithionol	10 mM	436	402	15.138	10.448	2.75	1.934	0	-0.674	0	false
01920:I04	1920	I04	NINDS2	NINDS	1500255	Dioxybenzone	10 mM	367	356	21.798	21.067	15.057	15.339	0	-0.674	0	false
01920:I05	1920	I05	NINDS2	NINDS	1500151	Bromocriptine mesylate	10 mM	365	355	9.863	6.761	3.564	15.687	0	-0.674	0	false
01920:I06	1920	I06	NINDS2	NINDS	1500256	Diphenhydramine hydrochloride	10 mM	381	351	19.948	21.083	13.793	14.339	0	-0.674	0	false
01920:I07	1920	I07	NINDS2	NINDS	1500152	Busulfan	10 mM	374	352	10.963	13.636	2.191	15.019	0	-0.674	0	false
01920:I08	1920	I08	NINDS2	NINDS	1500258	Diphenylpyraline hydrochloride	10 mM	371	383	39.353	37.859	39.355	11.641	24.247	1.963	0.235	false
01920:I09	1920	I09	NINDS2	NINDS	1500155	Caffeine	10 mM	374	332	10.695	16.867	4.355	17.419	0	-0.674	0	false
01920:I10	1920	I10	NINDS2	NINDS	1500259	Dipyridamole	10 mM	360	365	26.389	15.342	14.059	15.059	0	-0.674	0	false
01920:I11	1920	I11	NINDS2	NINDS	1500156	1r-camphor	10 mM	344	351	10.756	13.39	1.87	18.567	0	-0.674	0	false
01920:I12	1920	I12	NINDS2	NINDS	1500260	Pyrithione zinc	10 mM	350	359	31.143	33.148	30.275	16.921	13.076	0.748	0.127	false
01920:I13	1920	I13	NINDS2	NINDS	1500157	Capreomycin sulfate	10 mM	377	376	12.732	8.511	0.315	11.796	0	-0.674	0	false
01920:I14	1920	I14	NINDS2	NINDS	1500261	Disopyramide phosphate	10 mM	383	313	10.183	12.46	0.799	18.671	0	-0.674	0	false
01920:I15	1920	I15	NINDS2	NINDS	1500158	Carbachol	10 mM	311	323	12.219	11.146	1.246	25.698	0	-0.674	0	false
01920:I16	1920	I16	NINDS2	NINDS	1500262	Disulfiram	10 mM	384	354	9.115	10.169	1.602	13.636	0	-0.674	0	false
01920:I17	1920	I17	NINDS2	NINDS	1500159	Carbamazepine	10 mM	388	389	10.825	8.997	1.275	8.979	0	-0.674	0	false
01920:I18	1920	I18	NINDS2	NINDS	1500263	Dopamine hydrochloride	10 mM	375	412	8	9.709	2.704	7.704	0	-0.674	0	false
01920:I19	1920	I19	NINDS2	NINDS	1500160	Carbenicillin disodium	10 mM	390	407	13.333	11.548	2.307	6.59	0	-0.674	0	false
01920:I20	1920	I20	NINDS2	NINDS	1500266	Doxycycline hydrochloride	10 mM	358	359	8.38	8.357	3.425	16.007	0	-0.674	0	false
01920:I21	1920	I21	NINDS2	NINDS	1500161	Carbinoxamine maleate	10 mM	328	375	21.037	36	25.386	17.515	0	-0.674	0	false
01920:I22	1920	I22	NINDS2	NINDS	1500264	Doxepin hydrochloride	10 mM	360	384	55.833	57.552	65.022	12.778	50.963	4.869	0.495	false
01920:J03	1920	J03	NINDS2	NINDS	1500363	Lactulose	10 mM	388	407	22.165	24.57	17.856	6.819	9.912	0.404	0.096	false
01920:J04	1920	J04	NINDS2	NINDS	1500492	Polymyxin b sulfate	10 mM	367	358	14.169	13.408	4.234	15.099	0	-0.674	0	false
01920:J05	1920	J05	NINDS2	NINDS	1500364	Leucovorin calcium	10 mM	335	357	17.313	16.527	8.667	18.875	0	-0.674	0	false
01920:J06	1920	J06	NINDS2	NINDS	1500494	Praziquantel	10 mM	317	374	16.088	20.053	10.387	18.892	0	-0.674	0	false
01920:J07	1920	J07	NINDS2	NINDS	1500365	Levonordefrin	10 mM	324	407	21.296	22.113	15.471	14.132	1.004	-0.565	0.01	false
01920:J08	1920	J08	NINDS2	NINDS	1500476	Phenelzine sulfate	10 mM	413	394	15.012	19.543	9.274	5.522	0.24	-0.648	0.002	false
01920:J09	1920	J09	NINDS2	NINDS	1500368	Lincomycin hydrochloride	10 mM	393	333	13.486	17.417	6.678	15.128	0	-0.674	0	false
01920:J10	1920	J10	NINDS2	NINDS	1500495	Prazosin hydrochloride	10 mM	307	324	57.98	87.963	88.604	26.035	37.17	3.368	0.361	false
01920:J11	1920	J11	NINDS2	NINDS	1500372	Mafenide hydrochloride	10 mM	351	364	12.251	15.11	4.15	16.207	0	-0.674	0	false
01920:J12	1920	J12	NINDS2	NINDS	1500496	Prednisolone	10 mM	313	322	9.904	20.497	6.448	25.59	0	-0.674	0	false
01920:J13	1920	J13	NINDS2	NINDS	1500373	Maprotiline hydrochloride	10 mM	413	357	86.925	87.675	108.336	9.962	94.554	9.61	0.918	true
01920:J14	1920	J14	NINDS2	NINDS	1500497	Prednisolone acetate	10 mM	348	328	16.379	17.073	8.421	20.87	0	-0.674	0	false
01920:J15	1920	J15	NINDS2	NINDS	1500375	Mechlorethamine	10 mM	331	312	17.825	21.154	12.383	24.733	0	-0.674	0	false
01920:J16	1920	J16	NINDS2	NINDS	1500499	Prednisone	10 mM	398	337	15.829	13.947	5.769	14.077	0	-0.674	0	false
01920:J17	1920	J17	NINDS2	NINDS	1500376	Meclizine hydrochloride	10 mM	383	386	44.125	46.373	48.831	9.91	38.752	3.54	0.376	false
01920:J18	1920	J18	NINDS2	NINDS	1500500	Primaquine diphosphate	10 mM	408	380	18.137	18.684	10.803	7.774	2.603	-0.391	0.025	false
01920:J19	1920	J19	NINDS2	NINDS	1500379	Medroxyprogesterone acetate	10 mM	352	351	14.773	17.094	7.329	17.653	0	-0.674	0	false
01920:J20	1920	J20	NINDS2	NINDS	1500501	Primidone	10 mM	354	391	15.819	14.578	6.222	12.624	0	-0.674	0	false
01920:J21	1920	J21	NINDS2	NINDS	1500380	Medrysone	10 mM	341	346	7.331	6.358	5.6	19.51	0	-0.674	0	false
01920:J22	1920	J22	NINDS2	NINDS	1500502	Probenecid	10 mM	367	370	16.621	18.108	9.34	13.659	0	-0.674	0	false
01920:K03	1920	K03	NINDS2	NINDS	1500162	Carisoprodol	10 mM	420	406	7.857	9.852	2.698	3.282	0	-0.674	0	false
01920:K04	1920	K04	NINDS2	NINDS	1500267	Doxylamine succinate	10 mM	361	365	10.803	14.795	2.923	14.944	0	-0.674	0	false
01920:K05	1920	K05	NINDS2	NINDS	1500163	Cefadroxil	10 mM	327	386	12.538	13.99	3.534	16.309	0	-0.674	0	false
01920:K06	1920	K06	NINDS2	NINDS	1500268	Dyclonine hydrochloride	10 mM	316	372	9.177	14.247	1.405	19.246	0	-0.674	0	false
01920:K07	1920	K07	NINDS2	NINDS	1500164	Cefazolin sodium	10 mM	404	399	11.634	13.534	2.579	5.95	0	-0.674	0	false
01920:K08	1920	K08	NINDS2	NINDS	1500269	Dyphylline	10 mM	347	412	14.409	10.68	2.417	10.904	0	-0.674	0	false
01920:K09	1920	K09	NINDS2	NINDS	1500165	Cefotaxime sodium	10 mM	323	362	11.455	12.431	1.654	19.647	0	-0.674	0	false
01920:K10	1920	K10	NINDS2	NINDS	1500270	Trisodium ethylenediamine tetracetate	10 mM	350	364	10.571	14.835	2.793	16.321	0	-0.674	0	false
01920:K11	1920	K11	NINDS2	NINDS	1500166	Cephalothin sodium	10 mM	341	340	11.73	5.882	2.916	20.23	0	-0.674	0	false
01920:K12	1920	K12	NINDS2	NINDS	1500272	Emetine	10 mM	328	382	77.439	71.99	90.4	16.675	64.524	6.344	0.627	false
01920:K13	1920	K13	NINDS2	NINDS	1500167	Cephapirin sodium	10 mM	367	378	16.621	22.487	12.522	12.699	0	-0.674	0	false
01920:K14	1920	K14	NINDS2	NINDS	1500273	Ephedrine (1r,2s) hydrochloride	10 mM	351	386	11.681	14.508	3.32	13.567	0	-0.674	0	false
01920:K15	1920	K15	NINDS2	NINDS	1500180	Chlorothiazide	10 mM	382	380	12.042	14.737	3.735	10.745	0	-0.674	0	false
01920:K16	1920	K16	NINDS2	NINDS	1500274	Adrenaline bitartrate	10 mM	390	393	8.974	10.941	1.137	8.27	0	-0.674	0	false
01920:K17	1920	K17	NINDS2	NINDS	1500181	Chlorotrianisene	10 mM	416	400	12.019	21.5	8.635	4.459	0	-0.674	0	false
01920:K18	1920	K18	NINDS2	NINDS	1500275	Equilin	10 mM	428	406	20.794	16.01	10.69	2.368	2.703	-0.38	0.026	false
01920:K19	1920	K19	NINDS2	NINDS	1500182	Chloroxylenol	10 mM	403	361	12.655	14.404	3.916	10.625	0	-0.674	0	false
01920:K20	1920	K20	NINDS2	NINDS	1500276	Ergocalciferol	10 mM	350	409	7.714	7.579	4.449	10.921	0	-0.674	0	false
01920:K21	1920	K21	NINDS2	NINDS	1500183	Chlorpheniramine (s) maleate	10 mM	321	402	22.118	29.602	21.481	15.075	0.465	-0.624	0.005	false
01920:K22	1920	K22	NINDS2	NINDS	1500277	Ergonovine maleate	10 mM	372	431	10.484	32.251	15.39	7.492	0	-0.674	0	false
01920:L03	1920	L03	NINDS2	NINDS	1500381	Megestrol acetate	10 mM	408	423	11.275	12.293	1.43	3.378	0	-0.674	0	false
01920:L04	1920	L04	NINDS2	NINDS	1500503	Procainamide hydrochloride	10 mM	369	387	11.111	11.628	0.834	11.39	0	-0.674	0	false
01920:L05	1920	L05	NINDS2	NINDS	1500383	Mepenzolate bromide	10 mM	345	339	11.884	10.029	0.205	19.893	0	-0.674	0	false
01920:L06	1920	L06	NINDS2	NINDS	1500504	Procaine hydrochloride	10 mM	358	363	11.732	15.702	4.223	15.527	0	-0.674	0	false
01920:L07	1920	L07	NINDS2	NINDS	1500387	Mercaptopurine	10 mM	394	416	11.675	12.26	1.682	5.053	0	-0.674	0	false
01920:L08	1920	L08	NINDS2	NINDS	1500505	Prochlorperazine edisylate	10 mM	432	407	49.537	57.494	60.642	1.791	53.891	5.187	0.523	false
01920:L09	1920	L09	NINDS2	NINDS	1500390	Metaproterenol	10 mM	432	399	16.435	13.283	5.705	2.751	0	-0.674	0	false
01920:L10	1920	L10	NINDS2	NINDS	1500507	Procyclidine hydrochloride	10 mM	322	343	62.112	63.557	73.712	22.041	49.803	4.743	0.484	false
01920:L11	1920	L11	NINDS2	NINDS	1500391	Methacholine chloride	10 mM	393	355	16.539	12.958	5.54	12.488	0	-0.674	0	false
01920:L12	1920	L12	NINDS2	NINDS	1500508	Progesterone	10 mM	382	360	17.539	14.444	7.309	13.145	0	-0.674	0	false
01920:L13	1920	L13	NINDS2	NINDS	1500394	Methenamine	10 mM	401	365	18.953	12.603	6.945	10.374	0	-0.674	0	false
01920:L14	1920	L14	NINDS2	NINDS	1500509	Promazine hydrochloride	10 mM	401	413	86.783	84.746	106.109	4.613	95.042	9.663	0.923	true
01920:L15	1920	L15	NINDS2	NINDS	1500395	Methicillin sodium	10 mM	364	370	25.824	21.892	18.43	14.002	0	-0.674	0	false
01920:L16	1920	L16	NINDS2	NINDS	1500510	Promethazine hydrochloride	10 mM	385	383	70.39	74.935	87.684	10.042	77.003	7.701	0.748	false
01920:L17	1920	L17	NINDS2	NINDS	1500396	Methimazole	10 mM	383	367	13.316	14.169	4.2	12.19	0	-0.674	0	false
01920:L18	1920	L18	NINDS2	NINDS	1500511	Propantheline bromide	10 mM	419	408	14.558	13.971	4.912	3.156	0.439	-0.627	0.004	false
01920:L19	1920	L19	NINDS2	NINDS	1500397	Methocarbamol	10 mM	381	357	11.286	18.207	5.736	13.619	0	-0.674	0	false
01920:L20	1920	L20	NINDS2	NINDS	1500514	Dexpropranolol hydrochloride	10 mM	356	392	18.539	24.745	15.485	12.275	0	-0.674	0	false
01920:L21	1920	L21	NINDS2	NINDS	1500398	Methotrexate(+/-)	10 mM	373	323	10.456	19.505	6.107	18.614	0	-0.674	0	false
01920:L22	1920	L22	NINDS2	NINDS	1500515	Propylthiouracil	10 mM	382	399	6.545	12.281	1.838	8.464	0	-0.674	0	false
01920:M03	1920	M03	NINDS2	NINDS	1500184	Chlorpromazine	10 mM	350	387	62	57.364	69.134	13.561	47.948	4.541	0.466	false
01920:M04	1920	M04	NINDS2	NINDS	1500280	Erythromycin	10 mM	385	359	4.156	4.735	8.967	12.922	0	-0.674	0	false
01920:M05	1920	M05	NINDS2	NINDS	1500185	Chlorpropamide	10 mM	349	339	7.163	8.555	4.12	19.436	0	-0.674	0	false
01920:M06	1920	M06	NINDS2	NINDS	1500282	Estradiol	10 mM	382	379	4.712	6.069	7.615	10.865	0	-0.674	0	false
01920:M07	1920	M07	NINDS2	NINDS	1500186	Chlortetracycline hydrochloride	10 mM	437	390	7.78	12.821	0.594	3.26	0	-0.674	0	false
01920:M08	1920	M08	NINDS2	NINDS	1500283	Estradiol cypionate	10 mM	363	397	7.989	10.831	1.896	10.875	0	-0.674	0	false
01920:M09	1920	M09	NINDS2	NINDS	1500187	Chlorthalidone	10 mM	407	370	6.143	7.568	5.54	9.088	0	-0.674	0	false
01920:M10	1920	M10	NINDS2	NINDS	1500284	Estradiol valerate	10 mM	362	387	9.945	12.403	0.594	12.19	0	-0.674	0	false
01920:M11	1920	M11	NINDS2	NINDS	1500168	Cephradine	10 mM	400	395	4	7.595	6.996	6.888	0	-0.674	0	false
01920:M12	1920	M12	NINDS2	NINDS	1500285	Estriol	10 mM	388	414	8.505	7.005	4.322	5.979	0	-0.674	0	false
01920:M13	1920	M13	NINDS2	NINDS	1500169	Cetylpyridinium chloride	10 mM	331	331	77.039	77.039	93.795	22.453	67.327	6.649	0.654	false
01920:M14	1920	M14	NINDS2	NINDS	1500286	Estrone	10 mM	387	370	27.132	11.351	11.67	11.373	0	-0.674	0	false
01920:M15	1920	M15	NINDS2	NINDS	1500171	Chlorambucil	10 mM	353	388	7.649	12.629	0.824	13.098	0	-0.674	0	false
01920:M16	1920	M16	NINDS2	NINDS	1500287	Ethacrynic acid	10 mM	422	328	3.791	4.878	9.115	12.414	0	-0.674	0	false
01920:M17	1920	M17	NINDS2	NINDS	1500173	Chloramphenicol hemisuccinate	10 mM	405	362	8.642	7.459	3.898	10.277	0	-0.674	0	false
01920:M18	1920	M18	NINDS2	NINDS	1500288	Ethambutol hydrochloride	10 mM	370	405	8.108	8.642	3.405	9.115	0	-0.674	0	false
01920:M19	1920	M19	NINDS2	NINDS	1500174	Chloramphenicol	10 mM	420	391	6.429	12.276	1.921	5.082	0	-0.674	0	false
01920:M20	1920	M20	NINDS2	NINDS	1500291	Ethinyl estradiol	10 mM	387	370	7.752	10.541	2.271	11.373	0	-0.674	0	false
01920:M21	1920	M21	NINDS2	NINDS	1500177	Chlorhexidine	10 mM	387	412	7.752	12.379	0.935	6.333	0	-0.674	0	false
01920:M22	1920	M22	NINDS2	NINDS	1500292	Ethionamide	10 mM	376	343	11.17	9.621	0.584	15.871	0	-0.674	0	false
01920:N03	1920	N03	NINDS2	NINDS	1500399	Methoxamine hydrochloride	10 mM	396	458	5.556	10.044	4.145	4.749	0	-0.674	0	false
01920:N04	1920	N04	NINDS2	NINDS	1500516	Pseudoephedrine hydrochloride	10 mM	358	346	10.894	10.694	0.005	17.567	0	-0.674	0	false
01920:N05	1920	N05	NINDS2	NINDS	1500400	Methoxsalen	10 mM	381	419	7.349	8.831	3.791	6.463	0	-0.674	0	false
01920:N06	1920	N06	NINDS2	NINDS	1500517	Pyrantel pamoate	10 mM	417	383	5.276	6.266	7.083	6.385	0.034	-0.671	0	false
01920:N07	1920	N07	NINDS2	NINDS	1500401	Methscopolamine bromide	10 mM	382	370	10.995	11.351	0.553	11.945	0	-0.674	0	false
01920:N08	1920	N08	NINDS2	NINDS	1500518	Pyrazinamide	10 mM	393	387	12.214	10.336	0.654	8.647	0	-0.674	0	false
01920:N09	1920	N09	NINDS2	NINDS	1500403	Methyldopa	10 mM	391	361	5.115	9.695	4.702	11.996	0	-0.674	0	false
01920:N10	1920	N10	NINDS2	NINDS	1500519	Pyrilamine maleate	10 mM	342	328	28.947	27.744	24.835	21.556	0.63	-0.606	0.006	false
01920:N11	1920	N11	NINDS2	NINDS	1500404	Methylergonovine maleate	10 mM	361	414	9.418	9.179	2.112	9.064	0	-0.674	0	false
01920:N12	1920	N12	NINDS2	NINDS	1500520	Pyrimethamine	10 mM	368	336	17.12	16.964	8.852	17.625	0	-0.674	0	false
01920:N13	1920	N13	NINDS2	NINDS	1500406	Methylprednisolone	10 mM	357	360	3.361	6.111	8.515	16.002	0	-0.674	0	false
01920:N14	1920	N14	NINDS2	NINDS	1500521	Pyrvinium pamoate	10 mM	342	346	77.778	82.081	97.968	19.396	78.547	7.869	0.763	false
01920:N15	1920	N15	NINDS2	NINDS	1500410	Metoclopramide hydrochloride	10 mM	373	346	10.456	17.63	4.745	15.853	0	-0.674	0	false
01920:N16	1920	N16	NINDS2	NINDS	1500522	Quinacrine hydrochloride	10 mM	160	175	100	100	126.301	60.715	60.375	5.892	0.586	false
01920:N17	1920	N17	NINDS2	NINDS	1500411	Metoprolol tartrate	10 mM	437	426	13.272	12.441	2.914	0.064	1.37	-0.525	0.013	false
01920:N18	1920	N18	NINDS2	NINDS	1500523	Quinidine gluconate	10 mM	420	409	43.81	33.007	38.899	2.922	23.455	1.877	0.228	false
01920:N19	1920	N19	NINDS2	NINDS	1500412	Metronidazole	10 mM	373	384	13.137	13.281	3.431	11.293	0	-0.674	0	false
01920:N20	1920	N20	NINDS2	NINDS	1500524	Quinine sulfate	10 mM	373	339	13.673	38.053	21.805	16.693	0	-0.674	0	false
01920:N21	1920	N21	NINDS2	NINDS	1500413	Miconazole nitrate	10 mM	361	383	11.08	7.05	2.515	12.784	0	-0.674	0	false
01920:N22	1920	N22	NINDS2	NINDS	1500525	Racephedrine hydrochloride	10 mM	437	376	8.009	6.915	4.729	4.94	0	-0.674	0	false
01920:O03	1920	O03	NINDS2	NINDS	1500178	Chlorocresol	10 mM	396	398	9.343	8.04	2.992	6.985	0	-0.674	0	false
01920:O04	1920	O04	NINDS2	NINDS	1500293	Ethopropazine hydrochloride	10 mM	316	361	47.468	48.753	52.864	20.567	31.042	2.702	0.301	false
01920:O05	1920	O05	NINDS2	NINDS	1500179	Chloroquine diphosphate	10 mM	330	365	27.879	19.726	18.271	18.487	0	-0.674	0	false
01920:O06	1920	O06	NINDS2	NINDS	1500295	Eucatropine hydrochloride	10 mM	342	381	17.544	11.811	5.399	15.195	0	-0.674	0	false
01920:O07	1920	O07	NINDS2	NINDS	1500188	Chlorzoxazone	10 mM	385	392	6.494	17.602	1.995	8.962	0	-0.674	0	false
01920:O08	1920	O08	NINDS2	NINDS	1500296	Eugenol	10 mM	350	437	6.286	11.67	2.46	10.006	0	-0.674	0	false
01920:O09	1920	O09	NINDS2	NINDS	1500189	Ciclopirox olamine	10 mM	353	373	27.195	32.976	27.431	14.898	8.47	0.247	0.082	false
01920:O10	1920	O10	NINDS2	NINDS	1500299	Fludrocortisone acetate	10 mM	344	340	6.395	9.118	4.239	19.887	0	-0.674	0	false
01920:O11	1920	O11	NINDS2	NINDS	1500190	Cinoxacin	10 mM	340	366	19.706	9.836	5.453	17.224	0	-0.674	0	false
01920:O12	1920	O12	NINDS2	NINDS	1500300	Flumethazone pivalate	10 mM	321	328	5.607	4.878	7.864	23.956	0	-0.674	0	false
01920:O13	1920	O13	NINDS2	NINDS	1500191	Clemastine	10 mM	371	424	42.857	43.868	46.137	7.606	37.255	3.378	0.362	false
01920:O14	1920	O14	NINDS2	NINDS	1500303	Fluocinonide	10 mM	359	327	17.549	8.869	3.263	19.733	0	-0.674	0	false
01920:O15	1920	O15	NINDS2	NINDS	1500192	Clidinium bromide	10 mM	335	377	7.164	6.631	5.517	16.475	0	-0.674	0	false
01920:O16	1920	O16	NINDS2	NINDS	1500304	Fluorometholone	10 mM	407	383	7.371	7.05	5.07	7.528	0	-0.674	0	false
01920:O17	1920	O17	NINDS2	NINDS	1500195	Clofibric acid	10 mM	402	384	10.448	7.813	2.396	7.979	0	-0.674	0	false
01920:O18	1920	O18	NINDS2	NINDS	1500305	Fluorouracil	10 mM	434	408	5.53	9.559	4.515	1.442	0	-0.674	0	false
01920:O19	1920	O19	NINDS2	NINDS	1500196	Clomiphene citrate	10 mM	342	342	14.327	17.836	7.562	19.876	0	-0.674	0	false
01920:O20	1920	O20	NINDS2	NINDS	1500308	Flurbiprofen	10 mM	360	371	7.5	12.399	1.094	14.339	0	-0.674	0	false
01920:O21	1920	O21	NINDS2	NINDS	1500200	Clotrimazole	10 mM	365	393	7.945	12.214	0.921	11.127	0	-0.674	0	false
01920:O22	1920	O22	NINDS2	NINDS	1500309	Furazolidone	10 mM	396	372	7.828	8.871	3.432	10.105	0	-0.674	0	false
01920:P03	1920	P03	NINDS2	NINDS	1500415	Minoxidil	10 mM	389	405	12.082	10.123	0.409	6.944	0	-0.674	0	false
01920:P04	1920	P04	NINDS2	NINDS	1500526	Reserpine	10 mM	396	373	58.081	61.93	69.753	9.985	59.146	5.759	0.574	false
01920:P05	1920	P05	NINDS2	NINDS	1500418	Moxalactam disodium	10 mM	349	355	10.315	9.296	1.409	17.516	0	-0.674	0	false
01920:P06	1920	P06	NINDS2	NINDS	1500527	Resorcinol	10 mM	378	385	9.788	10.39	0.977	10.602	0	-0.674	0	false
01920:P07	1920	P07	NINDS2	NINDS	1500420	Nafcillin sodium	10 mM	420	393	9.762	8.397	2.444	4.842	0	-0.674	0	false
01920:P08	1920	P08	NINDS2	NINDS	1500529	Rifampin	10 mM	418	417	9.33	10.791	1.001	2.235	0	-0.674	0	false
01920:P09	1920	P09	NINDS2	NINDS	1500422	Naloxone hydrochloride	10 mM	395	379	7.342	15.567	1.1	9.379	0	-0.674	0	false
01920:P10	1920	P10	NINDS2	NINDS	1500530	Roxarsone	10 mM	349	348	15.759	11.207	3.73	18.356	0	-0.674	0	false
01920:P11	1920	P11	NINDS2	NINDS	1500424	Naphazoline hydrochloride	10 mM	368	372	12.5	12.366	2.327	13.304	0	-0.674	0	false
01920:P12	1920	P12	NINDS2	NINDS	1500531	Salicyl alcohol	10 mM	380	345	8.947	11.304	0.892	15.173	0	-0.674	0	false
01920:P13	1920	P13	NINDS2	NINDS	1500425	Naproxen(+)	10 mM	424	383	9.67	9.661	1.589	5.585	0	-0.674	0	false
01920:P14	1920	P14	NINDS2	NINDS	1500532	Salicylamide	10 mM	414	389	14.493	15.938	6.296	6.008	0	-0.674	0	false
01920:P15	1920	P15	NINDS2	NINDS	1500428	Neostigmine bromide	10 mM	404	377	7.178	12.997	0.88	8.591	0	-0.674	0	false
01920:P16	1920	P16	NINDS2	NINDS	1500533	Sodium salicylate	10 mM	404	380	14.604	12.368	3.778	8.231	0	-0.674	0	false
01920:P17	1920	P17	NINDS2	NINDS	1500430	Niacin	10 mM	400	427	12.75	11.007	1.512	4.292	0	-0.674	0	false
01920:P18	1920	P18	NINDS2	NINDS	1500534	Scopolamine hydrobromide	10 mM	450	389	10.222	12.853	1.112	3.315	0	-0.674	0	false
01920:P19	1920	P19	NINDS2	NINDS	1500431	Nifedipine	10 mM	397	396	13.854	20.707	9.322	7.11	0	-0.674	0	false
01920:P20	1920	P20	NINDS2	NINDS	1500536	Sisomicin sulfate	10 mM	413	336	10.169	16.667	3.847	12.483	0	-0.674	0	false
01920:P21	1920	P21	NINDS2	NINDS	1500433	Nitrofurantoin	10 mM	388	390	9.794	5.128	4.798	8.859	0	-0.674	0	false
01920:P22	1920	P22	NINDS2	NINDS	1500538	Spectinomycin hydrochloride	10 mM	432	397	5.093	11.083	3.708	2.991	0	-0.674	0	false
01921:A03	1921	A03	NINDS2	NINDS	1500539	Spironolactone	10 mM	491	544	21.792	21.691	0.149	0	0	-0.674	0	false
01921:A04	1921	A04	NINDS2	NINDS	1500663	Yohimbine hydrochloride	10 mM	496	488	36.089	25.205	12.71	0	1.612	-0.566	0.016	false
01921:A05	1921	A05	NINDS2	NINDS	1500541	Streptomycin sulfate	10 mM	485	438	19.381	15.297	6.09	0.459	1.415	-0.579	0.014	false
01921:A06	1921	A06	NINDS2	NINDS	1500665	Acebutolol hydrochloride	10 mM	452	482	24.779	8.921	6.817	0.316	0	-0.674	0	false
01921:A07	1921	A07	NINDS2	NINDS	1500543	Streptozosin	10 mM	431	434	16.473	13.594	9.346	3.536	2.815	-0.485	0.029	false
01921:A08	1921	A08	NINDS2	NINDS	1500666	Acemetacin	10 mM	469	450	15.778	20.444	4.971	0	0.479	-0.642	0.005	false
01921:A09	1921	A09	NINDS2	NINDS	1500544	Sulfabenzamide	10 mM	497	476	18.511	10.084	10.404	0	1.891	-0.547	0.019	false
01921:A10	1921	A10	NINDS2	NINDS	1500667	Adenosine phosphate	10 mM	421	438	9.026	18.265	11.273	4.183	0	-0.674	0	false
01921:A11	1921	A11	NINDS2	NINDS	1500545	Sulfacetamide	10 mM	395	431	17.722	16.009	6.752	7.833	0	-0.674	0	false
01921:A12	1921	A12	NINDS2	NINDS	1500668	Ketotifen fumarate	10 mM	437	410	45.309	85.61	62.099	5.591	16.936	0.464	0.172	false
01921:A13	1921	A13	NINDS2	NINDS	1500546	Sulfadiazine	10 mM	377	437	14.589	14.188	10.252	9.133	0.597	-0.634	0.006	false
01921:A14	1921	A14	NINDS2	NINDS	1500669	Benfluorex hydrochloride	10 mM	442	465	24.208	18.28	0.573	1.415	0	-0.674	0	false
01921:A15	1921	A15	NINDS2	NINDS	1500547	Sulfamerazine	10 mM	427	481	24.122	16.84	1.656	3.064	0	-0.674	0	false
01921:A16	1921	A16	NINDS2	NINDS	1500673	Molsidomine	10 mM	435	446	12.644	24.439	4.341	2.185	0	-0.674	0	false
01921:A17	1921	A17	NINDS2	NINDS	1500548	Sulfamethazine	10 mM	480	480	22.5	16.875	2.773	0	0	-0.674	0	false
01921:A18	1921	A18	NINDS2	NINDS	1500674	Mycophenolic acid	10 mM	456	457	30.044	10.722	1.831	0	0	-0.674	0	false
01921:A19	1921	A19	NINDS2	NINDS	1500549	Sulfamethizole	10 mM	507	528	27.219	11.364	3.364	0	0	-0.674	0	false
01921:A20	1921	A20	NINDS2	NINDS	1500675	Oleandomycin phosphate	10 mM	457	562	24.945	20.641	1.623	0	0	-0.674	0	false
01921:A21	1921	A21	NINDS2	NINDS	1500550	Sulfamethoxazole	10 mM	541	517	33.641	27.273	12.456	0	5.855	-0.281	0.06	false
01921:A22	1921	A22	NINDS2	NINDS	1500676	Ouabain	10 mM	422	440	94.787	94.091	102.959	3.847	97.615	5.889	0.993	true
01921:B03	1921	B03	NINDS2	NINDS	1501002	Droperidol	10 mM	481	488	57.796	53.074	47.786	0	42.611	2.19	0.433	false
01921:B04	1921	B04	NINDS2	NINDS	1501203	Retinol	10 mM	445	464	25.618	20.69	2.131	1.085	0	-0.674	0	false
01921:B05	1921	B05	NINDS2	NINDS	1501003	Famotidine	10 mM	478	485	22.176	26.804	4.05	0	0	-0.674	0	false
01921:B06	1921	B06	NINDS2	NINDS	1501204	Lapachol	10 mM	461	434	62.256	23.963	30.253	0.912	0	-0.674	0	false
01921:B07	1921	B07	NINDS2	NINDS	1501004	Dropropizine	10 mM	439	480	30.296	26.458	9.522	1.745	3.714	-0.425	0.038	false
01921:B08	1921	B08	NINDS2	NINDS	1501205	Lanatoside c	10 mM	422	372	91.706	93.817	100.596	11.538	87.746	5.225	0.892	true
01921:B09	1921	B09	NINDS2	NINDS	1501005	Etodolac	10 mM	448	471	15.402	22.505	3.773	0.756	0	-0.674	0	false
01921:B10	1921	B10	NINDS2	NINDS	1501214	Enalapril maleate	10 mM	426	438	21.596	27.169	3.901	3.633	0	-0.674	0	false
01921:B11	1921	B11	NINDS2	NINDS	1501007	Fenoterol hydrobromide	10 mM	411	396	17.275	15.404	7.497	10.033	0	-0.674	0	false
01921:B12	1921	B12	NINDS2	NINDS	1501215	Ketoprofen	10 mM	365	451	14.247	8.647	14.427	9.879	0	-0.674	0	false
01921:B13	1921	B13	NINDS2	NINDS	1501008	Fenbufen	10 mM	396	370	13.131	23.784	4.463	14.622	0	-0.674	0	false
01921:B14	1921	B14	NINDS2	NINDS	1501217	Lisinopril	10 mM	431	475	20.418	12.842	7.103	2.624	0	-0.674	0	false
01921:B15	1921	B15	NINDS2	NINDS	1501009	1r,9s-hydrastine	10 mM	400	412	16.75	14.563	8.463	9.432	0	-0.674	0	false
01921:B16	1921	B16	NINDS2	NINDS	1502001	Acetyl-l-leucine	10 mM	466	423	10.086	24.35	6.206	2.156	0	-0.674	0	false
01921:B17	1921	B17	NINDS2	NINDS	1501010	Fenofibrate	10 mM	457	391	29.978	54.987	29.558	5.775	0	-0.674	0	false
01921:B18	1921	B18	NINDS2	NINDS	1502003	Bufexamac	10 mM	446	450	13.901	22.889	4.557	0.976	0	-0.674	0	false
01921:B19	1921	B19	NINDS2	NINDS	1501011	Fenoprofen	10 mM	403	441	22.333	15.873	3.603	5.822	0	-0.674	0	false
01921:B20	1921	B20	NINDS2	NINDS	1502004	Bumetanide	10 mM	480	479	40	42.797	27.958	0	25.525	1.042	0.26	false
01921:B21	1921	B21	NINDS2	NINDS	1501015	Flufenamic acid	10 mM	483	457	40.994	31.947	20.952	0	11.634	0.108	0.118	false
01921:B22	1921	B22	NINDS2	NINDS	1502005	Carbenoxolone sodium	10 mM	500	461	22	17.137	2.939	0	0	-0.674	0	false
01921:C03	1921	C03	NINDS2	NINDS	1500551	Sulfapyridine	10 mM	504	481	25.397	48.233	21.535	0	0	-0.674	0	false
01921:C04	1921	C04	NINDS2	NINDS	1500677	Albuterol (+/-)	10 mM	477	463	28.092	37.581	15.869	0	6.7	-0.224	0.068	false
01921:C05	1921	C05	NINDS2	NINDS	1500552	Sulfasalazine	10 mM	433	441	16.166	19.728	5.207	2.525	0	-0.674	0	false
01921:C06	1921	C06	NINDS2	NINDS	1500678	Gamma-aminobutyric acid	10 mM	448	479	20.759	15.658	4.863	0.756	0	-0.674	0	false
01921:C07	1921	C07	NINDS2	NINDS	1500553	Sulfathiazole	10 mM	469	417	15.565	17.746	7.038	2.835	2.173	-0.528	0.022	false
01921:C08	1921	C08	NINDS2	NINDS	1500679	Aminopterin	10 mM	426	422	23.474	18.009	1.282	5.443	0	-0.674	0	false
01921:C09	1921	C09	NINDS2	NINDS	1500554	Sulfinpyrazone	10 mM	435	423	16.552	15.366	8.033	4.341	2.376	-0.515	0.024	false
01921:C10	1921	C10	NINDS2	NINDS	1500680	Arecoline hydrobromide	10 mM	356	392	19.101	20.918	2.295	16.531	0	-0.674	0	false
01921:C11	1921	C11	NINDS2	NINDS	1500556	Sulindac	10 mM	398	359	20.101	14.485	6.16	15.647	0	-0.674	0	false
01921:C12	1921	C12	NINDS2	NINDS	1500682	Captopril	10 mM	410	418	11.707	24.88	4.687	7.654	0	-0.674	0	false
01921:C13	1921	C13	NINDS2	NINDS	1500557	Tamoxifen citrate	10 mM	329	435	50.456	56.322	44.924	14.635	24.903	1	0.253	false
01921:C14	1921	C14	NINDS2	NINDS	1500684	Cimetidine	10 mM	381	386	46.719	11.399	10.391	14.461	0	-0.674	0	false
01921:C15	1921	C15	NINDS2	NINDS	1500558	Terbutaline hemisulfate	10 mM	419	461	19.57	14.534	6.499	3.943	0	-0.674	0	false
01921:C16	1921	C16	NINDS2	NINDS	1500685	Clozapine	10 mM	382	437	87.435	71.625	81.828	8.583	56.825	3.146	0.578	false
01921:C17	1921	C17	NINDS2	NINDS	1500564	Tetracaine hydrochloride	10 mM	382	421	72.775	58.67	62.306	10.393	37.309	1.834	0.379	false
01921:C18	1921	C18	NINDS2	NINDS	1500687	1s,9r-hydrastine	10 mM	441	418	34.014	22.488	9.32	4.247	0	-0.674	0	false
01921:C19	1921	C19	NINDS2	NINDS	1500566	Tetracycline hydrochloride	10 mM	441	408	18.141	14.216	7.731	5.378	0	-0.674	0	false
01921:C20	1921	C20	NINDS2	NINDS	1500688	Kynurenic acid	10 mM	426	445	16.901	13.708	8.964	3.174	2.48	-0.508	0.025	false
01921:C21	1921	C21	NINDS2	NINDS	1500567	Tetrahydrozoline hydrochloride	10 mM	453	421	31.788	23.515	8.482	2.588	0	-0.674	0	false
01921:C22	1921	C22	NINDS2	NINDS	1500689	Lidocaine hydrochloride	10 mM	536	491	20.336	36.864	9.898	0	0	-0.674	0	false
01921:D03	1921	D03	NINDS2	NINDS	1501016	Fenbendazole	10 mM	345	389	69.855	44.73	50.351	18.079	6.766	-0.22	0.069	false
01921:D04	1921	D04	NINDS2	NINDS	1502006	Carprofen	10 mM	439	427	24.374	49.415	21.654	3.449	0	-0.674	0	false
01921:D05	1921	D05	NINDS2	NINDS	1501017	Ferulic acid	10 mM	436	404	34.862	27.475	13.459	6.38	0	-0.674	0	false
01921:D06	1921	D06	NINDS2	NINDS	1502012	Fosfosal	10 mM	391	381	21.228	17.585	3.165	13.928	0	-0.674	0	false
01921:D07	1921	D07	NINDS2	NINDS	1501019	Berbamine hydrochloride	10 mM	407	440	28.256	18.636	2.53	5.496	0	-0.674	0	false
01921:D08	1921	D08	NINDS2	NINDS	1502013	Isotretinon	10 mM	428	439	26.168	24.374	5.135	3.3	0	-0.674	0	false
01921:D09	1921	D09	NINDS2	NINDS	1501021	Fenspiride hydrochloride	10 mM	384	385	29.688	30.39	11.885	14.245	0	-0.674	0	false
01921:D10	1921	D10	NINDS2	NINDS	1502014	Mesna	10 mM	397	396	36.272	18.939	8.39	11.572	0	-0.674	0	false
01921:D11	1921	D11	NINDS2	NINDS	1501026	Fendiline hydrochloride	10 mM	326	278	81.288	76.259	80.791	32.722	42.39	2.176	0.431	false
01921:D12	1921	D12	NINDS2	NINDS	1502015	Niflumic acid	10 mM	403	333	20.347	28.228	3.774	18.038	0	-0.674	0	false
01921:D13	1921	D13	NINDS2	NINDS	1501103	Mefenamic acid	10 mM	361	381	39.889	42.52	27.682	17.225	8.189	-0.124	0.083	false
01921:D14	1921	D14	NINDS2	NINDS	1502016	Tretinon	10 mM	411	362	35.766	21.547	9.886	13.878	0	-0.674	0	false
01921:D15	1921	D15	NINDS2	NINDS	1501104	Methacycline hydrochloride	10 mM	388	387	21.907	15.762	3.981	13.579	0	-0.674	0	false
01921:D16	1921	D16	NINDS2	NINDS	1502018	Bretylium tosylate	10 mM	410	378	10.488	32.804	0.081	12.179	0	-0.674	0	false
01921:D17	1921	D17	NINDS2	NINDS	1501105	Puromycin hydrochloride	10 mM	134	138	95.522	99.275	107.159	69.662	34.589	1.651	0.352	false
01921:D18	1921	D18	NINDS2	NINDS	1502019	Foscarnet sodium	10 mM	414	390	21.498	21.795	0.015	10.382	0	-0.674	0	false
01921:D19	1921	D19	NINDS2	NINDS	1501108	Mefexamide	10 mM	453	415	29.801	23.133	6.812	3.267	0	-0.674	0	false
01921:D20	1921	D20	NINDS2	NINDS	1502020	Folic acid	10 mM	487	447	48.46	17.226	15.755	0	0	-0.674	0	false
01921:D21	1921	D21	NINDS2	NINDS	1501109	Probucol	10 mM	496	444	39.315	23.198	13.556	0	0	-0.674	0	false
01921:D22	1921	D22	NINDS2	NINDS	1502021	Phthalylsulfathiazole	10 mM	415	504	30.12	17.857	3.29	4.383	0	-0.674	0	false
01921:E03	1921	E03	NINDS2	NINDS	1500568	Theophylline	10 mM	470	450	30	18.444	3.622	0	0	-0.674	0	false
01921:E04	1921	E04	NINDS2	NINDS	1500690	Melatonin	10 mM	383	440	22.977	23.636	2.364	8.134	0	-0.674	0	false
01921:E05	1921	E05	NINDS2	NINDS	1500570	Thiabendazole	10 mM	444	411	42.342	27.981	19.085	4.709	0	-0.674	0	false
01921:E06	1921	E06	NINDS2	NINDS	1500691	Phentolamine hydrochloride	10 mM	387	360	17.054	21.944	3.007	16.743	0	-0.674	0	false
01921:E07	1921	E07	NINDS2	NINDS	1500572	Thimerosal	10 mM	191	213	99.476	98.592	109.457	54.914	52.819	2.877	0.537	false
01921:E08	1921	E08	NINDS2	NINDS	1500695	Acetyl tyrosine ethyl ester	10 mM	398	366	30.653	33.607	14.85	14.855	0	-0.674	0	false
01921:E09	1921	E09	NINDS2	NINDS	1500573	Thioguanine	10 mM	350	362	25.714	17.403	0.135	20.583	0	-0.674	0	false
01921:E10	1921	E10	NINDS2	NINDS	1500699	Acetyltryptophanamide	10 mM	372	383	20.161	11.488	8.245	15.79	0	-0.674	0	false
01921:E11	1921	E11	NINDS2	NINDS	1500575	Thioridazine hydrochloride	10 mM	328	356	55.793	45.787	41.2	23.68	7.123	-0.196	0.072	false
01921:E12	1921	E12	NINDS2	NINDS	1500702	Acetyltryptophan	10 mM	328	334	23.78	49.102	21.014	26.169	0	-0.674	0	false
01921:E13	1921	E13	NINDS2	NINDS	1500576	Thiothixene	10 mM	364	378	64.56	69.048	63.892	17.235	42.758	2.2	0.435	false
01921:E14	1921	E14	NINDS2	NINDS	1500703	Acetylglutamic acid	10 mM	337	331	26.409	15.106	1.277	25.519	0	-0.674	0	false
01921:E15	1921	E15	NINDS2	NINDS	1500578	Timolol maleate	10 mM	367	330	14.169	17.879	7.926	22.334	0	-0.674	0	false
01921:E16	1921	E16	NINDS2	NINDS	1500704	N-acetylproline	10 mM	357	403	47.339	29.28	23.526	15.177	0	-0.674	0	false
01921:E17	1921	E17	NINDS2	NINDS	1500580	Tolazoline hydrochloride	10 mM	396	354	23.737	41.243	15.403	16.432	0	-0.674	0	false
01921:E18	1921	E18	NINDS2	NINDS	1500707	Citropten	10 mM	434	405	20.968	42.222	14.148	6.487	0	-0.674	0	false
01921:E19	1921	E19	NINDS2	NINDS	1500582	Tolmetin sodium	10 mM	481	417	25.364	62.59	31.708	2.835	0	-0.674	0	false
01921:E20	1921	E20	NINDS2	NINDS	1500709	Chrysin	10 mM	406	432	39.409	50.463	32.985	6.51	15.85	0.391	0.161	false
01921:E21	1921	E21	NINDS2	NINDS	1500583	Tolnaftate	10 mM	424	450	21.698	23.556	1.407	3.394	0	-0.674	0	false
01921:E22	1921	E22	NINDS2	NINDS	1500715	Acetylglucosamine	10 mM	457	452	19.475	34.071	7.309	0	0	-0.674	0	false
01921:F03	1921	F03	NINDS2	NINDS	1501110	Mebendazole	10 mM	393	374	60.051	62.834	56.305	14.5	39.557	1.985	0.402	false
01921:F04	1921	F04	NINDS2	NINDS	1502024	Pipemidic acid	10 mM	424	424	21.462	34.198	8.798	5.437	0	-0.674	0	false
01921:F05	1921	F05	NINDS2	NINDS	1501111	Protoporphyrin ix	10 mM	360	423	12.5	15.839	10.55	12.585	0	-0.674	0	false
01921:F06	1921	F06	NINDS2	NINDS	1502025	Succinylsulfathiazole	10 mM	350	380	27.714	21.316	4.052	18.548	0	-0.674	0	false
01921:F07	1921	F07	NINDS2	NINDS	1501113	Peruvoside	10 mM	371	363	96.226	95.868	105.235	18.162	85.897	5.101	0.873	true
01921:F08	1921	F08	NINDS2	NINDS	1502026	Tranexamic acid	10 mM	394	367	29.442	36.785	16.253	15.181	0	-0.674	0	false
01921:F09	1921	F09	NINDS2	NINDS	1501114	Pimethixene maleate	10 mM	402	408	73.881	75.245	74.856	9.665	64.467	3.66	0.656	false
01921:F10	1921	F10	NINDS2	NINDS	1502028	Cephalexin	10 mM	336	362	25.595	25.414	5.471	22.122	0	-0.674	0	false
01921:F11	1921	F11	NINDS2	NINDS	1501115	Nalbuphine hydrochloride	10 mM	348	334	22.126	40.12	13.471	23.97	0	-0.674	0	false
01921:F12	1921	F12	NINDS2	NINDS	1502030	Oxolinic acid	10 mM	369	348	34.146	26.149	12.013	20.078	0	-0.674	0	false
01921:F13	1921	F13	NINDS2	NINDS	1501116	Mebhydrolin naphthalenesulfonate	10 mM	352	325	28.409	31.385	11.692	24.549	0	-0.674	0	false
01921:F14	1921	F14	NINDS2	NINDS	1502031	Cefoxitin sodium	10 mM	368	346	16.848	39.595	9.382	20.415	0	-0.674	0	false
01921:F15	1921	F15	NINDS2	NINDS	1501117	Mebeverine hydrochloride	10 mM	319	404	20.69	32.178	6.82	19.241	0	-0.674	0	false
01921:F16	1921	F16	NINDS2	NINDS	1502033	Cefuroxime sodium	10 mM	389	387	20.823	25.323	2.045	13.469	0	-0.674	0	false
01921:F17	1921	F17	NINDS2	NINDS	1501118	Meclocycline sulfosalicylate	10 mM	403	349	22.333	47.278	18.7	16.228	0	-0.674	0	false
01921:F18	1921	F18	NINDS2	NINDS	1502034	Metampicillin sodium	10 mM	389	392	20.566	20.918	1.264	12.903	0	-0.674	0	false
01921:F19	1921	F19	NINDS2	NINDS	1501119	Proglumide	10 mM	373	392	29.491	32.143	12.992	14.662	0	-0.674	0	false
01921:F20	1921	F20	NINDS2	NINDS	1502037	Lomefloxacin hydrochloride	10 mM	437	502	21.739	25.896	3.098	1.965	0	-0.674	0	false
01921:F21	1921	F21	NINDS2	NINDS	1501120	Minaprine hydrochloride	10 mM	453	411	36.645	43.796	26.304	3.719	15.806	0.388	0.161	false
01921:F22	1921	F22	NINDS2	NINDS	1502039	Fosfomycin	10 mM	490	455	16.735	34.286	5.532	0	0	-0.674	0	false
01921:G03	1921	G03	NINDS2	NINDS	1500584	Tranylcypromine sulfate	10 mM	429	426	29.371	19.484	3.917	4.661	0	-0.674	0	false
01921:G04	1921	G04	NINDS2	NINDS	1500750	Neohesperidin dihydrochalcone	10 mM	407	388	14.988	27.835	0.279	11.377	0	-0.674	0	false
01921:G05	1921	G05	NINDS2	NINDS	1500585	Triacetin	10 mM	396	433	22.727	41.801	15.088	7.497	0	-0.674	0	false
01921:G06	1921	G06	NINDS2	NINDS	1500753	Physostigmine	10 mM	365	409	21.37	24.694	1.984	13.619	0	-0.674	0	false
01921:G07	1921	G07	NINDS2	NINDS	1500586	Triamcinolone	10 mM	366	352	15.301	34.375	4.585	19.956	0	-0.674	0	false
01921:G08	1921	G08	NINDS2	NINDS	1500754	Xanthurenic acid	10 mM	410	399	30.244	27.82	10.452	9.803	0	-0.674	0	false
01921:G09	1921	G09	NINDS2	NINDS	1500587	Triamcinolone acetonide	10 mM	337	332	20.475	14.759	5.702	25.406	0	-0.674	0	false
01921:G10	1921	G10	NINDS2	NINDS	1500756	Nalidixic acid	10 mM	359	346	13.649	32.081	1.793	21.404	0	-0.674	0	false
01921:G11	1921	G11	NINDS2	NINDS	1500588	Triamcinolone diacetate	10 mM	298	336	19.463	12.798	7.807	29.24	0	-0.674	0	false
01921:G12	1921	G12	NINDS2	NINDS	1500758	Lobeline hydrochloride	10 mM	394	350	19.289	20.286	2.612	17.104	0	-0.674	0	false
01921:G13	1921	G13	NINDS2	NINDS	1500590	Trichlormethiazide	10 mM	353	368	12.465	24.185	4.648	19.575	0	-0.674	0	false
01921:G14	1921	G14	NINDS2	NINDS	1500760	Hecogenin	10 mM	347	392	26.801	16.582	0.047	17.52	0	-0.674	0	false
01921:G15	1921	G15	NINDS2	NINDS	1500591	Trifluoperazine hydrochloride	10 mM	358	377	61.732	62.865	57.51	18.008	38.905	1.941	0.396	false
01921:G16	1921	G16	NINDS2	NINDS	1500763	Calcein	10 mM	375	396	0	0	30.599	13.99	16.609	0.442	0.169	false
01921:G17	1921	G17	NINDS2	NINDS	1500592	Trihexyphenidyl hydrochloride	10 mM	464	465	35.991	24.731	12.305	0	0.834	-0.618	0.008	false
01921:G18	1921	G18	NINDS2	NINDS	1500764	Kinetin	10 mM	453	470	16.998	22.766	2.464	0.206	0	-0.674	0	false
01921:G19	1921	G19	NINDS2	NINDS	1500593	Trimeprazine tartrate	10 mM	457	464	85.558	81.034	87.189	0	81.975	4.837	0.834	false
01921:G20	1921	G20	NINDS2	NINDS	1500767	Butamben	10 mM	423	425	27.66	22.353	4.75	5.434	0	-0.674	0	false
01921:G21	1921	G21	NINDS2	NINDS	1500594	Trimethobenzamide hydrochloride	10 mM	479	462	39.875	22.511	13.463	0	0	-0.674	0	false
01921:G22	1921	G22	NINDS2	NINDS	1500771	Cefaclor	10 mM	422	422	16.351	20.853	4.278	5.883	0	-0.674	0	false
01921:H03	1921	H03	NINDS2	NINDS	1501121	Memantine hydrochloride	10 mM	429	447	51.981	48.546	40.476	2.844	33.783	1.597	0.344	false
01921:H04	1921	H04	NINDS2	NINDS	1502040	Cefmetazole sodium	10 mM	427	426	27.635	23.474	5.529	4.881	0	-0.674	0	false
01921:H05	1921	H05	NINDS2	NINDS	1501125	3-aminopropanesulphonic acid	10 mM	391	402	23.274	21.642	1.157	11.552	0	-0.674	0	false
01921:H06	1921	H06	NINDS2	NINDS	1502041	Cefamandole nafate	10 mM	421	370	33.017	22.432	8.578	11.874	0	-0.674	0	false
01921:H07	1921	H07	NINDS2	NINDS	1501126	5-aminopentanoic acid hydrochloride	10 mM	402	364	16.418	22.253	3.236	14.641	0	-0.674	0	false
01921:H08	1921	H08	NINDS2	NINDS	1502042	Cefoperazone sodium	10 mM	388	415	22.938	19.277	0.759	10.412	0	-0.674	0	false
01921:H09	1921	H09	NINDS2	NINDS	1501127	Atenolol	10 mM	433	396	18.014	10.606	10.384	7.614	0	-0.674	0	false
01921:H10	1921	H10	NINDS2	NINDS	1502043	Pralidoxime mesylate	10 mM	402	343	35.075	37.609	20.805	17.017	1.574	-0.569	0.016	false
01921:H11	1921	H11	NINDS2	NINDS	1501128	E-capsaicin	10 mM	381	392	12.861	15.816	10.312	13.783	0	-0.674	0	false
01921:H12	1921	H12	NINDS2	NINDS	1502044	Ofloxacin	10 mM	393	382	14.504	18.325	7.374	13.595	0	-0.674	0	false
01921:H13	1921	H13	NINDS2	NINDS	1501129	Carbetapentane citrate	10 mM	342	383	78.07	43.603	55.335	19.088	1.409	-0.58	0.014	false
01921:H14	1921	H14	NINDS2	NINDS	1502045	Piromidic acid	10 mM	357	346	40.056	24.277	14.845	21.624	0	-0.674	0	false
01921:H15	1921	H15	NINDS2	NINDS	1501130	Aminopyridine	10 mM	345	353	34.493	21.813	9.178	22.151	0	-0.674	0	false
01921:H16	1921	H16	NINDS2	NINDS	1502046	Bezafibrate	10 mM	352	407	23.58	30.713	7.814	15.274	0	-0.674	0	false
01921:H17	1921	H17	NINDS2	NINDS	1501132	Nerol	10 mM	406	387	21.921	21.964	0.433	11.6	0	-0.674	0	false
01921:H18	1921	H18	NINDS2	NINDS	1502047	Liothyronine sodium	10 mM	398	460	43.216	35.217	24.839	6.252	10.289	0.017	0.105	false
01921:H19	1921	H19	NINDS2	NINDS	1501134	Pimozide	10 mM	463	395	28.51	37.722	16.263	5.323	2.049	-0.537	0.021	false
01921:H20	1921	H20	NINDS2	NINDS	1502050	Cephaloridine	10 mM	401	443	42.893	26.411	18.357	5.922	0	-0.674	0	false
01921:H21	1921	H21	NINDS2	NINDS	1501135	Nicardipine hydrochloride	10 mM	485	429	53.814	34.033	31.46	1.477	9.911	-0.008	0.101	false
01921:H22	1921	H22	NINDS2	NINDS	1502082	Indole-2-carboxylic acid	10 mM	463	469	40.173	16.631	9.497	0	0	-0.674	0	false
01921:I03	1921	I03	NINDS2	NINDS	1500595	Trimethoprim	10 mM	434	416	32.719	24.038	9.509	5.242	0	-0.674	0	false
01921:I04	1921	I04	NINDS2	NINDS	1500772	Iodipamide	10 mM	399	418	50.125	22.727	20.834	8.863	0	-0.674	0	false
01921:I05	1921	I05	NINDS2	NINDS	1500596	Trioxsalen	10 mM	392	338	49.235	26.627	22.976	18.681	0	-0.674	0	false
01921:I06	1921	I06	NINDS2	NINDS	1500774	Thyroxine	10 mM	336	372	22.024	19.355	1.347	20.991	0	-0.674	0	false
01921:I07	1921	I07	NINDS2	NINDS	1500598	Triprolidine hydrochloride	10 mM	340	339	59.412	28.319	31.343	24.284	0	-0.674	0	false
01921:I08	1921	I08	NINDS2	NINDS	1500779	Suprofen methyl ester	10 mM	353	401	23.513	39.651	14.114	15.843	0	-0.674	0	false
01921:I09	1921	I09	NINDS2	NINDS	1500599	Tropicamide	10 mM	356	320	21.91	20.938	0.303	24.674	0	-0.674	0	false
01921:I10	1921	I10	NINDS2	NINDS	1500801	Allantoin	10 mM	335	337	19.104	33.234	6.454	25.06	0	-0.674	0	false
01921:I11	1921	I11	NINDS2	NINDS	1500600	Tryptophan	10 mM	320	308	22.5	24.675	2.766	29.989	0	-0.674	0	false
01921:I12	1921	I12	NINDS2	NINDS	1500804	Althiazide	10 mM	335	381	27.164	21.785	3.998	20.083	0	-0.674	0	false
01921:I13	1921	I13	NINDS2	NINDS	1500601	Tuaminoheptane sulfate	10 mM	343	307	26.239	25.407	5.919	27.574	0	-0.674	0	false
01921:I14	1921	I14	NINDS2	NINDS	1500807	Adenine	10 mM	362	315	40.331	41.27	27.106	24.58	1.939	-0.544	0.02	false
01921:I15	1921	I15	NINDS2	NINDS	1500603	Tyrothricin	10 mM	354	360	24.294	17.5	1.066	20.37	0	-0.674	0	false
01921:I16	1921	I16	NINDS2	NINDS	1500810	Aminacrine	10 mM	328	326	76.829	76.074	77.52	27.074	49.043	2.623	0.499	false
01921:I17	1921	I17	NINDS2	NINDS	1500604	Urea	10 mM	385	375	19.221	28.267	3.008	15.266	0	-0.674	0	false
01921:I18	1921	I18	NINDS2	NINDS	1500811	Berberine chloride	10 mM	390	372	32.564	19.086	5.883	15.056	0	-0.674	0	false
01921:I19	1921	I19	NINDS2	NINDS	1500605	Ursodiol	10 mM	356	361	35.393	21.607	9.665	20.037	0	-0.674	0	false
01921:I20	1921	I20	NINDS2	NINDS	1500812	Bekanamycin sulfate	10 mM	431	440	28.074	24.773	6.76	2.858	0.39	-0.648	0.004	false
01921:I21	1921	I21	NINDS2	NINDS	1500606	Valproate sodium	10 mM	393	488	21.12	32.172	7.118	6.801	0	-0.674	0	false
01921:I22	1921	I22	NINDS2	NINDS	1500813	Budesonide	10 mM	368	425	22.283	14.824	4.383	11.479	0	-0.674	0	false
01921:J03	1921	J03	NINDS2	NINDS	1501137	Nefopam	10 mM	395	418	48.354	65.789	50.168	9.303	23.99	0.938	0.244	false
01921:J04	1921	J04	NINDS2	NINDS	1502084	Proadifen hydrochloride	10 mM	373	301	78.016	75.748	78.124	24.955	50.256	2.704	0.511	false
01921:J05	1921	J05	NINDS2	NINDS	1501138	Pirenzepine hydrochloride	10 mM	440	384	21.136	20.573	1.107	8.202	0	-0.674	0	false
01921:J06	1921	J06	NINDS2	NINDS	1502085	Cyclocreatine	10 mM	367	357	27.52	22.689	4.891	19.28	0	-0.674	0	false
01921:J07	1921	J07	NINDS2	NINDS	1501139	Pramoxine hydrochloride	10 mM	328	360	46.951	69.167	51.578	23.228	6.724	-0.222	0.068	false
01921:J08	1921	J08	NINDS2	NINDS	1502094	Rosmarinic acid	10 mM	352	372	33.239	27.419	12.276	19.233	0	-0.674	0	false
01921:J09	1921	J09	NINDS2	NINDS	1501140	Mephenesin	10 mM	378	356	42.328	21.067	14.165	18.184	0	-0.674	0	false
01921:J10	1921	J10	NINDS2	NINDS	1502101	Perillic acid (-)	10 mM	365	339	25.479	19.764	1.376	21.536	0	-0.674	0	false
01921:J11	1921	J11	NINDS2	NINDS	1501142	Sulfachlorpyridazine	10 mM	292	308	31.507	25	9.339	33.067	0	-0.674	0	false
01921:J12	1921	J12	NINDS2	NINDS	1502102	Quinolinic acid	10 mM	308	322	15.26	18.323	6.843	29.724	0	-0.674	0	false
01921:J13	1921	J13	NINDS2	NINDS	1501143	Sulfaphenazole	10 mM	332	331	17.47	28.097	1.654	26.068	0	-0.674	0	false
01921:J14	1921	J14	NINDS2	NINDS	1502103	Anthraquinone	10 mM	330	353	39.091	16.147	8.392	23.8	0	-0.674	0	false
01921:J15	1921	J15	NINDS2	NINDS	1501144	Sulfadimethoxine	10 mM	340	364	17.353	17.308	6.09	21.456	0	-0.674	0	false
01921:J16	1921	J16	NINDS2	NINDS	1502106	Carboplatin	10 mM	321	357	19.626	18.207	3.85	24.337	0	-0.674	0	false
01921:J17	1921	J17	NINDS2	NINDS	1505364	Cefprozil	10 mM	362	360	16.575	21.944	3.345	19.491	0	-0.674	0	false
01921:J18	1921	J18	NINDS2	NINDS	1502107	Cisplatin	10 mM	371	410	41.509	24.634	16.122	12.846	0	-0.674	0	false
01921:J19	1921	J19	NINDS2	NINDS	1501146	Sulfaguanidine	10 mM	360	405	51.667	20.988	20.684	14.621	0	-0.674	0	false
01921:J20	1921	J20	NINDS2	NINDS	1502109	Zidovudine [azt]	10 mM	409	431	18.337	9.745	10.767	6.294	0	-0.674	0	false
01921:J21	1921	J21	NINDS2	NINDS	1501147	Sulfamonomethoxine	10 mM	449	443	17.817	37.472	8.557	0.646	0	-0.674	0	false
01921:J22	1921	J22	NINDS2	NINDS	1502111	Azacitidine	10 mM	418	447	21.531	48.993	19.354	4.053	0	-0.674	0	false
01921:K03	1921	K03	NINDS2	NINDS	1500607	Vancomycin hydrochloride	10 mM	450	409	26.444	21.271	3.126	4.275	0	-0.674	0	false
01921:K04	1921	K04	NINDS2	NINDS	1500822	Brucine	10 mM	424	407	21.226	20.147	1.346	7.36	0	-0.674	0	false
01921:K05	1921	K05	NINDS2	NINDS	1500609	Vidarabine	10 mM	388	374	28.351	18.449	2.464	15.049	0	-0.674	0	false
01921:K06	1921	K06	NINDS2	NINDS	1500828	Canrenoic acid, potassium salt	10 mM	401	360	20.449	22.5	0.223	15.204	0	-0.674	0	false
01921:K07	1921	K07	NINDS2	NINDS	1500613	Warfarin	10 mM	407	346	20.393	19.364	2.489	16.128	0	-0.674	0	false
01921:K08	1921	K08	NINDS2	NINDS	1500833	Canavanine	10 mM	333	356	21.321	20.225	1.224	23.131	0	-0.674	0	false
01921:K09	1921	K09	NINDS2	NINDS	1500614	Xylometazoline hydrochloride	10 mM	354	369	57.062	48.238	43.835	19.352	15.248	0.351	0.155	false
01921:K10	1921	K10	NINDS2	NINDS	1500836	Cephalosporin c sodium	10 mM	366	381	24.59	13.386	3.779	16.676	0	-0.674	0	false
01921:K11	1921	K11	NINDS2	NINDS	1500615	Zomepirac sodium	10 mM	333	340	13.213	16.176	9.808	24.94	0	-0.674	0	false
01921:K12	1921	K12	NINDS2	NINDS	1500837	Chenodiol	10 mM	316	338	9.494	10.355	16.561	27.035	0	-0.674	0	false
01921:K13	1921	K13	NINDS2	NINDS	1500616	Acetarsol	10 mM	318	316	22.956	11.392	6.345	29.304	0	-0.674	0	false
01921:K14	1921	K14	NINDS2	NINDS	1500839	Cinchonidine	10 mM	344	303	18.023	16.832	5.956	27.916	0	-0.674	0	false
01921:K15	1921	K15	NINDS2	NINDS	1500618	Acriflavinium hydrochloride	10 mM	159	133	8.805	0.752	23.866	67.48	0	-0.674	0	false
01921:K16	1921	K16	NINDS2	NINDS	1500841	Cinchonine	10 mM	372	356	18.011	14.888	7.345	18.844	0	-0.674	0	false
01921:K17	1921	K17	NINDS2	NINDS	1500621	Aminophenazone	10 mM	389	344	14.91	13.663	10.398	18.332	0	-0.674	0	false
01921:K18	1921	K18	NINDS2	NINDS	1500860	S-isocorydine (+)	10 mM	393	340	54.453	25.294	25.704	18.345	0	-0.674	0	false
01921:K19	1921	K19	NINDS2	NINDS	1500623	Broxyquinoline	10 mM	380	402	18.947	10.448	9.839	12.762	0	-0.674	0	false
01921:K20	1921	K20	NINDS2	NINDS	1500861	Coralyne chloride	10 mM	387	432	20.93	17.13	3.698	8.599	0	-0.674	0	false
01921:K21	1921	K21	NINDS2	NINDS	1500624	Carnitine hydrochloride	10 mM	419	434	21.002	19.355	2.066	4.855	0	-0.674	0	false
01921:K22	1921	K22	NINDS2	NINDS	1500864	Harmaline	10 mM	420	410	56.429	54.634	47.931	7.46	38.211	1.895	0.389	false
01921:L03	1921	L03	NINDS2	NINDS	1501148	Sulconazole nitrate	10 mM	295	335	78.644	66.269	71.835	29.683	29.212	1.29	0.297	false
01921:L04	1921	L04	NINDS2	NINDS	1502112	Cycloheximide	10 mM	359	365	88.579	91.233	96.559	19.255	75.428	4.397	0.767	false
01921:L05	1921	L05	NINDS2	NINDS	1501149	Ritodrine hydrochloride	10 mM	396	404	30.051	18.317	3.567	10.777	0	-0.674	0	false
01921:L06	1921	L06	NINDS2	NINDS	1502127	Tinidazole	10 mM	407	413	47.42	19.613	16.717	8.55	0	-0.674	0	false
01921:L07	1921	L07	NINDS2	NINDS	1501151	Ranitidine	10 mM	340	314	26.765	37.261	14.707	27.112	0	-0.674	0	false
01921:L08	1921	L08	NINDS2	NINDS	1502128	Cycloleucine	10 mM	341	317	52.786	28.391	26.73	26.663	0	-0.674	0	false
01921:L09	1921	L09	NINDS2	NINDS	1501152	Spiperone	10 mM	367	352	24.523	26.42	5.43	19.846	0	-0.674	0	false
01921:L10	1921	L10	NINDS2	NINDS	1502155	N (g)-nitro-l-arginine	10 mM	370	308	30.27	24.351	8.007	24.493	0	-0.674	0	false
01921:L11	1921	L11	NINDS2	NINDS	1501153	Suloctidil	10 mM	362	359	70.994	34.819	44.115	19.604	0	-0.674	0	false
01921:L12	1921	L12	NINDS2	NINDS	1502195	Piracetam	10 mM	355	359	23.38	25.627	4.062	20.373	0	-0.674	0	false
01921:L13	1921	L13	NINDS2	NINDS	1501154	Ronidazole	10 mM	327	345	61.162	22.029	28.109	25.034	0	-0.674	0	false
01921:L14	1921	L14	NINDS2	NINDS	1502196	Ethosuximide	10 mM	309	395	15.858	13.671	9.725	21.358	0	-0.674	0	false
01921:L15	1921	L15	NINDS2	NINDS	1501155	Sulfameter	10 mM	375	346	24.8	29.191	7.592	19.645	0	-0.674	0	false
01921:L16	1921	L16	NINDS2	NINDS	1502197	Piperidolate hydrochloride	10 mM	320	366	52.5	64.754	52.351	23.429	17.22	0.483	0.175	false
01921:L17	1921	L17	NINDS2	NINDS	1501156	Sulfamethoxypyridazine	10 mM	384	360	16.146	41.389	10.161	17.072	0	-0.674	0	false
01921:L18	1921	L18	NINDS2	NINDS	1502198	Anisindione	10 mM	399	397	26.316	31.99	10.647	11.239	0	-0.674	0	false
01921:L19	1921	L19	NINDS2	NINDS	1501161	Suprofen	10 mM	332	414	25	42.512	17.193	16.68	0	-0.674	0	false
01921:L20	1921	L20	NINDS2	NINDS	1502202	Cyclosporine	10 mM	404	412	25.743	28.398	7.693	8.992	0	-0.674	0	false
01921:L21	1921	L21	NINDS2	NINDS	1501170	Acetaminosalol	10 mM	423	402	14.657	19.652	6.323	8.035	0	-0.674	0	false
01921:L22	1921	L22	NINDS2	NINDS	1502203	Troleandomycin	10 mM	422	456	39.1	26.096	15.463	3.614	0	-0.674	0	false
01921:M03	1921	M03	NINDS2	NINDS	1500626	Dichlorophene	10 mM	456	427	21.93	28.103	4.799	1.704	0	-0.674	0	false
01921:M04	1921	M04	NINDS2	NINDS	1500865	Harmalol hydrochloride	10 mM	428	404	40.187	23.02	14.044	7.259	0	-0.674	0	false
01921:M05	1921	M05	NINDS2	NINDS	1500629	Flopropione	10 mM	365	381	16.438	17.323	6.723	16.786	0	-0.674	0	false
01921:M06	1921	M06	NINDS2	NINDS	1500867	Harmine	10 mM	350	392	86.857	87.245	92.514	17.19	74.969	4.366	0.762	false
01921:M07	1921	M07	NINDS2	NINDS	1500632	Hexestrol	10 mM	374	364	13.102	25	3.621	17.719	0	-0.674	0	false
01921:M08	1921	M08	NINDS2	NINDS	1500869	Mimosine	10 mM	359	354	22.006	24.859	2.548	20.499	0	-0.674	0	false
01921:M09	1921	M09	NINDS2	NINDS	1500633	Hexetidine	10 mM	281	331	73.665	69.184	70.4	31.674	33.655	1.588	0.342	false
01921:M10	1921	M10	NINDS2	NINDS	1500872	Palmatine chloride	10 mM	333	369	19.219	18.157	4.173	21.66	0	-0.674	0	false
01921:M11	1921	M11	NINDS2	NINDS	1500634	Iproniazid sulfate	10 mM	360	377	23.611	11.406	5.875	17.788	0	-0.674	0	false
01921:M12	1921	M12	NINDS2	NINDS	1500873	Piperine	10 mM	320	417	22.5	21.343	0.4	17.66	0	-0.674	0	false
01921:M13	1921	M13	NINDS2	NINDS	1500636	Mecysteine hydrochloride	10 mM	328	340	23.78	11.471	5.709	25.49	0	-0.674	0	false
01921:M14	1921	M14	NINDS2	NINDS	1500899	Esculetin	10 mM	355	366	16.338	20.219	4.737	19.581	0	-0.674	0	false
01921:M15	1921	M15	NINDS2	NINDS	1500637	Merbromin	10 mM	387	374	38.76	12.834	5.806	15.159	0	-0.674	0	false
01921:M16	1921	M16	NINDS2	NINDS	1500901	Aesculin	10 mM	369	396	23.306	14.394	3.967	14.649	0	-0.674	0	false
01921:M17	1921	M17	NINDS2	NINDS	1500639	Octopamine hydrochloride	10 mM	399	407	29.073	14.496	0.166	10.108	0	-0.674	0	false
01921:M18	1921	M18	NINDS2	NINDS	1500903	Etoposide	10 mM	333	362	16.817	37.845	8.117	22.452	0	-0.674	0	false
01921:M19	1921	M19	NINDS2	NINDS	1500641	Pentamidine isethionate	10 mM	358	392	25.978	20.663	2.366	16.311	0	-0.674	0	false
01921:M20	1921	M20	NINDS2	NINDS	1500906	Lithocholic acid	10 mM	429	397	25.175	15.869	1.604	7.941	0	-0.674	0	false
01921:M21	1921	M21	NINDS2	NINDS	1500642	Phenacetin	10 mM	385	417	17.143	25.659	0.307	10.515	0	-0.674	0	false
01921:M22	1921	M22	NINDS2	NINDS	1500909	Protoveratrine a	10 mM	382	368	19.11	23.37	0.548	16.387	0	-0.674	0	false
01921:N03	1921	N03	NINDS2	NINDS	1501171	Saccharin	10 mM	457	451	23.414	26.164	4.467	0	1.939	-0.544	0.02	false
01921:N04	1921	N04	NINDS2	NINDS	1502223	Resveratrol	10 mM	431	421	37.587	48.694	30.446	5.007	14.747	0.317	0.15	false
01921:N05	1921	N05	NINDS2	NINDS	1501172	Azobenzene	10 mM	413	459	23.487	44.662	17.655	4.603	0	-0.674	0	false
01921:N06	1921	N06	NINDS2	NINDS	1502230	Ascorbic acid	10 mM	397	382	31.486	33.246	15.18	13.155	0.548	-0.638	0.006	false
01921:N07	1921	N07	NINDS2	NINDS	1501173	Acetanilide	10 mM	381	412	39.633	33.981	21.438	11.521	3.976	-0.407	0.04	false
01921:N08	1921	N08	NINDS2	NINDS	1502232	Camptothecin	10 mM	335	298	53.134	37.919	33.741	29.471	0	-0.674	0	false
01921:N09	1921	N09	NINDS2	NINDS	1501174	Todralazine hydrochloride	10 mM	364	345	28.571	30.435	11.131	20.967	0	-0.674	0	false
01921:N10	1921	N10	NINDS2	NINDS	1502234	Abscisic acid (cis,trans; +/-)	10 mM	376	384	27.926	21.875	4.598	15.237	0	-0.674	0	false
01921:N11	1921	N11	NINDS2	NINDS	1501175	Flurandrenolide	10 mM	323	364	28.483	36.538	15.404	23.325	0	-0.674	0	false
01921:N12	1921	N12	NINDS2	NINDS	1502236	Abrine (l)	10 mM	349	326	38.395	24.847	14.08	24.765	0	-0.674	0	false
01921:N13	1921	N13	NINDS2	NINDS	1501176	Erythromycin estolate	10 mM	393	368	37.659	34.239	20.232	15.178	1.342	-0.584	0.014	false
01921:N14	1921	N14	NINDS2	NINDS	1502237	Harmol hydrochloride	10 mM	340	373	75.588	40.751	51.562	20.438	0	-0.674	0	false
01921:N15	1921	N15	NINDS2	NINDS	1501179	Estradiol propionate	10 mM	350	338	73.714	70.118	71.098	23.298	43.607	2.257	0.443	false
01921:N16	1921	N16	NINDS2	NINDS	1502242	Scopoletin	10 mM	440	392	50.909	20.408	19.739	7.297	0	-0.674	0	false
01921:N17	1921	N17	NINDS2	NINDS	1501180	Estradiol diacetate	10 mM	465	355	35.699	18.31	7.539	9.847	0	-0.674	0	false
01921:N18	1921	N18	NINDS2	NINDS	1502244	Amygdalin	10 mM	469	378	34.115	38.095	20.475	7.246	9.573	-0.031	0.097	false
01921:N19	1921	N19	NINDS2	NINDS	1501181	Estrone acetate	10 mM	390	382	26.154	36.387	13.656	13.925	0	-0.674	0	false
01921:N20	1921	N20	NINDS2	NINDS	1502245	Ellagic acid	10 mM	341	396	99.707	15.657	50.723	17.727	0	-0.674	0	false
01921:N21	1921	N21	NINDS2	NINDS	1501184	Estradiol acetate	10 mM	389	318	39.589	25.472	15.364	21.273	0	-0.674	0	false
01921:N22	1921	N22	NINDS2	NINDS	1502248	Glutathione	10 mM	419	424	17.661	45.755	14.329	5.986	0	-0.674	0	false
01921:O03	1921	O03	NINDS2	NINDS	1500644	Phenylmercuric acetate	10 mM	206	159	94.175	89.937	99.578	59.373	35.202	1.692	0.358	false
01921:O04	1921	O04	NINDS2	NINDS	1500938	Protoveratrine b	10 mM	441	373	66.667	24.129	33.476	9.337	0	-0.674	0	false
01921:O05	1921	O05	NINDS2	NINDS	1500645	Pregnenolone	10 mM	442	401	48.643	21.446	18.88	6.06	0	-0.674	0	false
01921:O06	1921	O06	NINDS2	NINDS	1500984	Ginkgolide a	10 mM	417	404	30.456	36.881	17.036	8.468	2.456	-0.509	0.025	false
01921:O07	1921	O07	NINDS2	NINDS	1500646	Sulfanilamide	10 mM	412	393	29.369	29.262	10.86	10.262	0.242	-0.658	0.002	false
01921:O08	1921	O08	NINDS2	NINDS	1500990	Enoxolone	10 mM	370	367	28.378	20.436	3.895	17.82	0	-0.674	0	false
01921:O09	1921	O09	NINDS2	NINDS	1500647	Vincamine	10 mM	359	370	39.554	24.595	14.717	18.689	0	-0.674	0	false
01921:O10	1921	O10	NINDS2	NINDS	1500992	Flumequine	10 mM	414	345	26.812	23.188	4.746	15.471	0	-0.674	0	false
01921:O11	1921	O11	NINDS2	NINDS	1500648	Azelaic acid	10 mM	335	372	44.776	34.409	25.363	21.101	0	-0.674	0	false
01921:O12	1921	O12	NINDS2	NINDS	1500993	Flunarizine hydrochloride	10 mM	324	387	41.975	43.411	29.784	20.614	8.104	-0.13	0.082	false
01921:O13	1921	O13	NINDS2	NINDS	1500649	Theobromine	10 mM	372	352	20.968	26.989	3.33	19.296	0	-0.674	0	false
01921:O14	1921	O14	NINDS2	NINDS	1500994	Fluphenazine hydrochloride	10 mM	398	391	62.563	85.166	73.932	12.027	40.027	2.017	0.407	false
01921:O15	1921	O15	NINDS2	NINDS	1500651	Strychnine	10 mM	370	375	26.757	21.067	3.201	16.915	0	-0.674	0	false
01921:O16	1921	O16	NINDS2	NINDS	1500995	Flutamide	10 mM	412	434	53.883	19.585	21.249	5.625	0	-0.674	0	false
01921:O17	1921	O17	NINDS2	NINDS	1500655	Aconitine	10 mM	375	409	28	14.914	0.293	12.519	0	-0.674	0	false
01921:O18	1921	O18	NINDS2	NINDS	1500996	Glafenine	10 mM	425	431	24.471	25.058	4.426	4.535	0	-0.674	0	false
01921:O19	1921	O19	NINDS2	NINDS	1500656	Ajmaline	10 mM	377	403	44.297	21.092	15.569	12.978	0	-0.674	0	false
01921:O20	1921	O20	NINDS2	NINDS	1500999	Drofenine hydrochloride	10 mM	382	366	66.754	58.743	58.119	16.614	32.994	1.544	0.335	false
01921:O21	1921	O21	NINDS2	NINDS	1500657	Hydroquinidine	10 mM	351	399	60.114	25.063	29.525	16.289	0	-0.674	0	false
01921:O22	1921	O22	NINDS2	NINDS	1501000	Ethaverine hydrochloride	10 mM	409	385	23.716	23.636	2.885	11.497	0	-0.674	0	false
01921:P03	1921	P03	NINDS2	NINDS	1501185	Econazole nitrate	10 mM	334	387	23.952	33.333	9.937	19.515	0	-0.674	0	false
01921:P04	1921	P04	NINDS2	NINDS	1502252	Monocrotaline	10 mM	393	383	19.084	18.277	4.183	13.482	0	-0.674	0	false
01921:P05	1921	P05	NINDS2	NINDS	1501187	Flunisolide	10 mM	465	392	10.538	13.52	13.578	5.662	5.048	-0.335	0.051	false
01921:P06	1921	P06	NINDS2	NINDS	1502254	Menadione	10 mM	407	353	10.811	15.297	12.124	15.336	0	-0.674	0	false
01921:P07	1921	P07	NINDS2	NINDS	300340	Isopilocarpine nitrate	10 mM	433	389	35.566	10.797	2.11	8.406	0	-0.674	0	false
01921:P08	1921	P08	NINDS2	NINDS	1502255	Salicin	10 mM	405	423	64.691	8.511	20.994	7.638	0	-0.674	0	false
01921:P09	1921	P09	NINDS2	NINDS	1501194	Tolperisone hydrochloride	10 mM	392	375	17.092	14.4	8.339	14.496	0	-0.674	0	false
01921:P10	1921	P10	NINDS2	NINDS	1502258	Monensin sodium (monensin a is shown)	10 mM	350	379	74.286	73.351	73.796	18.661	53.576	2.928	0.545	false
01921:P11	1921	P11	NINDS2	NINDS	1501195	Furegrelate sodium	10 mM	322	333	17.081	18.018	5.777	26.941	0	-0.674	0	false
01921:P12	1921	P12	NINDS2	NINDS	1502259	Morin	10 mM	332	314	21.386	20.382	1.067	27.991	0	-0.674	0	false
01921:P13	1921	P13	NINDS2	NINDS	1501198	Tolfenamic acid	10 mM	355	301	13.803	17.94	8.14	26.933	0	-0.674	0	false
01921:P14	1921	P14	NINDS2	NINDS	1502260	Avermectin b1	10 mM	354	349	18.079	15.186	7.085	21.614	0	-0.674	0	false
01921:P15	1921	P15	NINDS2	NINDS	1501199	Zaprinast	10 mM	381	382	9.449	19.11	10.375	14.914	0	-0.674	0	false
01921:P16	1921	P16	NINDS2	NINDS	1503002	Benzyl benzoate	10 mM	422	432	16.825	12.963	9.547	4.752	0.823	-0.619	0.008	false
01921:P17	1921	P17	NINDS2	NINDS	1501200	Xylazine	10 mM	454	429	30.396	50.816	26.89	1.574	5.33	-0.316	0.054	false
01921:P18	1921	P18	NINDS2	NINDS	1503006	Benzyl isothiocyanate	10 mM	381	337	41.207	36.499	24.334	20.004	0	-0.674	0	false
01921:P19	1921	P19	NINDS2	NINDS	1501201	Tolazamide	10 mM	348	414	28.448	17.391	1.782	14.922	0	-0.674	0	false
01921:P20	1921	P20	NINDS2	NINDS	1503007	Betaine hydrochloride	10 mM	379	368	35.356	41.033	23.435	16.717	1.39	-0.581	0.014	false
01921:P21	1921	P21	NINDS2	NINDS	1501202	Galanthamine hydrobromide	10 mM	393	420	23.664	15.714	2.778	9.297	0	-0.674	0	false
01921:P22	1921	P22	NINDS2	NINDS	1503009	Biotin	10 mM	446	433	14.35	11.085	12.623	2.001	7.264	-0.186	0.074	false
01922:A03	1922	A03	NINDS2	NINDS	1503014	Aklomide	10 mM	295	319	27.458	27.9	13.422	0	11.87	0.206	0.14	false
01922:A04	1922	A04	NINDS2	NINDS	1503279	Oxethazaine	10 mM	305	257	31.148	38.911	2.814	0	0	-0.674	-0.027	false
01922:A05	1922	A05	NINDS2	NINDS	1503017	Aminothiazole	10 mM	285	304	21.053	38.487	10.013	0	0	-0.674	-0.027	false
01922:A06	1922	A06	NINDS2	NINDS	1503298	Dipyrone	10 mM	251	265	19.124	33.585	14.931	1.036	1.834	-0.538	-0.001	false
01922:A07	1922	A07	NINDS2	NINDS	1503036	Dinitolmide	10 mM	227	263	18.943	36.502	12.911	5.718	0	-0.674	-0.027	false
01922:A08	1922	A08	NINDS2	NINDS	1503297	Hexamethonium bromide	10 mM	270	307	29.259	24.756	14.503	0	8.23	-0.064	0.089	false
01922:A09	1922	A09	NINDS2	NINDS	1503038	Nicotinyl alcohol tartrate	10 mM	246	318	27.642	30.818	11.152	2.012	8.168	-0.069	0.088	false
01922:A10	1922	A10	NINDS2	NINDS	1503304	Urethane	10 mM	278	305	38.489	40.656	3.478	0	2.739	-0.471	0.012	false
01922:A11	1922	A11	NINDS2	NINDS	1503041	Aminohydroxybutyric acid	10 mM	258	286	21.705	33.916	12.926	0	3.139	-0.442	0.017	false
01922:A12	1922	A12	NINDS2	NINDS	1503322	Thiram	10 mM	219	267	84.475	60.3	49.289	7.279	13.525	0.329	0.163	false
01922:A13	1922	A13	NINDS2	NINDS	1503043	Bucladesine	10 mM	270	272	20.37	30.515	16.336	0	8.373	-0.053	0.091	false
01922:A14	1922	A14	NINDS2	NINDS	1503324	Thiotepa	10 mM	197	258	23.858	30.233	14.164	11.57	0	-0.674	-0.027	false
01922:A15	1922	A15	NINDS2	NINDS	1503044	Chromocarb	10 mM	314	278	21.338	32.374	14.31	0	5.587	-0.26	0.052	false
01922:A16	1922	A16	NINDS2	NINDS	1503330	Tetroquinone	10 mM	274	299	20.438	28.428	17.824	0	11.865	0.206	0.14	false
01922:A17	1922	A17	NINDS2	NINDS	1503045	Acexamic acid	10 mM	261	294	21.456	24.49	20.023	0	18.739	0.716	0.236	false
01922:A18	1922	A18	NINDS2	NINDS	1503341	Chloroacetoxyquinoline	10 mM	219	267	50.228	39.7	10.786	7.279	0	-0.674	-0.027	false
01922:A19	1922	A19	NINDS2	NINDS	1503051	Retinyl acetate	10 mM	270	309	17.407	24.272	22.945	0	17.816	0.647	0.223	false
01922:A20	1922	A20	NINDS2	NINDS	1503339	Sulfanitran	10 mM	267	334	25.843	24.251	17.205	0	13.88	0.355	0.168	false
01922:A21	1922	A21	NINDS2	NINDS	1503053	Pipenzolate bromide	10 mM	269	280	31.97	43.929	1.435	0	0	-0.674	-0.027	false
01922:A22	1922	A22	NINDS2	NINDS	1503373	Oxibendazole	10 mM	274	244	50.365	41.393	12.123	0	0.193	-0.66	-0.024	false
01922:B03	1922	B03	NINDS2	NINDS	1504027	Cytisine	10 mM	309	307	36.246	40.065	1.514	0	0.558	-0.633	-0.019	false
01922:B04	1922	B04	NINDS2	NINDS	1505281	Zolmitriptan	10 mM	269	303	49.814	52.145	19.648	0	18.252	0.679	0.229	false
01922:B05	1922	B05	NINDS2	NINDS	1504030	Beta-escin	10 mM	294	309	30.952	42.071	0.624	0	0	-0.674	-0.027	false
01922:B06	1922	B06	NINDS2	NINDS	1505294	Carbadox	10 mM	289	314	40.138	48.408	10.3	0	5.49	-0.267	0.05	false
01922:B07	1922	B07	NINDS2	NINDS	1504074	Embelin	10 mM	266	345	39.85	50.145	11.379	0	4.668	-0.328	0.039	false
01922:B08	1922	B08	NINDS2	NINDS	1505296	Oxfendazole	10 mM	257	291	40.078	37.113	1.959	0	0	-0.674	-0.027	false
01922:B09	1922	B09	NINDS2	NINDS	1504078	Sennoside a	10 mM	279	295	34.05	39.661	0.282	0	0	-0.674	-0.027	false
01922:B10	1922	B10	NINDS2	NINDS	1505299	Amitraz	10 mM	262	337	27.863	37.389	6.173	0	0	-0.674	-0.027	false
01922:B11	1922	B11	NINDS2	NINDS	1504085	Paroxetine hydrochloride	10 mM	263	304	76.426	84.539	61.609	0	59.538	3.742	0.808	false
01922:B12	1922	B12	NINDS2	NINDS	1505304	Secnidazole	10 mM	269	295	29.368	43.729	0.487	0	0	-0.674	-0.027	false
01922:B13	1922	B13	NINDS2	NINDS	1504088	Ethylnorepinephrine hydrochloride	10 mM	259	282	36.68	30.851	4.961	0	0	-0.674	-0.027	false
01922:B14	1922	B14	NINDS2	NINDS	1505305	Pefloxacine mesylate	10 mM	244	311	56.557	38.264	14.048	2.402	0	-0.674	-0.027	false
01922:B15	1922	B15	NINDS2	NINDS	1504094	Teniposide	10 mM	212	203	54.245	75.862	40.099	15.795	8.11	-0.073	0.087	false
01922:B16	1922	B16	NINDS2	NINDS	1505306	Aspartame	10 mM	291	318	21.306	42.453	6.926	0	0	-0.674	-0.027	false
01922:B17	1922	B17	NINDS2	NINDS	1504098	Phenothrin	10 mM	261	312	34.866	46.474	5.282	0	0	-0.674	-0.027	false
01922:B18	1922	B18	NINDS2	NINDS	1505309	Bifonazole	10 mM	248	317	36.694	56.467	13.871	1.622	0	-0.674	-0.027	false
01922:B19	1922	B19	NINDS2	NINDS	1504099	Sildenafil	10 mM	234	345	32.479	44.058	1.877	4.353	0	-0.674	-0.027	false
01922:B20	1922	B20	NINDS2	NINDS	1505310	Rebamipide	10 mM	286	365	31.119	29.589	9.683	0	6.038	-0.227	0.058	false
01922:B21	1922	B21	NINDS2	NINDS	1503223	Pararosaniline pamoate	10 mM	239	282	70.711	67.021	44.838	3.377	32.98	1.772	0.435	false
01922:B22	1922	B22	NINDS2	NINDS	1505312	Tylosin tartrate	10 mM	316	322	21.519	29.503	16.296	0	10.421	0.099	0.119	false
01922:C03	1922	C03	NINDS2	NINDS	1503059	Floxuridine	10 mM	285	252	30.526	63.889	15.117	0	0	-0.674	-0.027	false
01922:C04	1922	C04	NINDS2	NINDS	1503383	Pempidine tartrate	10 mM	323	328	42.415	63.11	22.656	0	6.472	-0.194	0.064	false
01922:C05	1922	C05	NINDS2	NINDS	1503065	Altretamine	10 mM	258	320	32.946	43.75	1.97	0	0	-0.674	-0.027	false
01922:C06	1922	C06	NINDS2	NINDS	1503381	Pasiniazid	10 mM	296	318	34.797	41.195	1.355	0	0	-0.674	-0.027	false
01922:C07	1922	C07	NINDS2	NINDS	1503069	Aminohippuric acid	10 mM	271	326	36.162	43.252	3.798	0	0	-0.674	-0.027	false
01922:C08	1922	C08	NINDS2	NINDS	1503391	D-phenylalanine	10 mM	260	298	37.308	50.336	9.785	0	0.355	-0.648	-0.022	false
01922:C09	1922	C09	NINDS2	NINDS	1503070	Mefloquine	10 mM	254	304	64.173	79.934	49.865	0.451	39.367	2.246	0.525	false
01922:C10	1922	C10	NINDS2	NINDS	1503393	Pipobroman	10 mM	247	330	33.603	44.848	3.225	1.817	0	-0.674	-0.027	false
01922:C11	1922	C11	NINDS2	NINDS	1503073	Adiphenine hydrochloride	10 mM	242	298	44.628	50.671	15.026	2.792	9.813	0.053	0.111	false
01922:C12	1922	C12	NINDS2	NINDS	1503403	Exalamide	10 mM	281	246	24.555	41.463	5.436	0	0	-0.674	-0.027	false
01922:C13	1922	C13	NINDS2	NINDS	1503074	Alexidine hydrochloride	10 mM	55	41	89.091	97.561	79.819	80.617	0	-0.674	-0.027	false
01922:C14	1922	C14	NINDS2	NINDS	1503419	Nafronyl oxalate	10 mM	225	298	20.889	56.376	3.021	6.108	0	-0.674	-0.027	false
01922:C15	1922	C15	NINDS2	NINDS	1503076	Quinapril hydrochloride	10 mM	226	280	27.876	53.571	5.728	5.913	0	-0.674	-0.027	false
01922:C16	1922	C16	NINDS2	NINDS	1503422	Semustine	10 mM	251	351	30.677	37.892	3.883	1.036	0	-0.674	-0.027	false
01922:C17	1922	C17	NINDS2	NINDS	1503077	Pridinol methanesulfonate	10 mM	245	350	28.163	62.286	12.327	2.207	0	-0.674	-0.027	false
01922:C18	1922	C18	NINDS2	NINDS	1503423	Spiramycin	10 mM	248	308	44.355	58.766	20.788	1.622	8.956	-0.01	0.099	false
01922:C19	1922	C19	NINDS2	NINDS	1503080	Ambroxol hydrochloride	10 mM	226	313	31.858	40.256	1.34	5.913	0	-0.674	-0.027	false
01922:C20	1922	C20	NINDS2	NINDS	1503432	Mepartricin	10 mM	267	342	23.221	34.211	11.676	0	3.131	-0.442	0.017	false
01922:C21	1922	C21	NINDS2	NINDS	1503083	Amiprilose	10 mM	304	337	17.763	36.795	13.5	0	0	-0.674	-0.027	false
01922:C22	1922	C22	NINDS2	NINDS	1503500	Resorcinol monoacetate	10 mM	315	320	19.683	31.563	16.036	0	6.412	-0.199	0.063	false
01922:D03	1922	D03	NINDS2	NINDS	1504105	Tannic acid	10 mM	309	311	35.922	46.945	6.349	0	0	-0.674	-0.027	false
01922:D04	1922	D04	NINDS2	NINDS	1505314	Sarafloxacin hydrochloride	10 mM	304	278	35.526	43.165	3.301	0	0	-0.674	-0.027	false
01922:D05	1922	D05	NINDS2	NINDS	1504116	Formestane	10 mM	291	312	41.581	63.462	22.346	0	5.001	-0.304	0.044	false
01922:D06	1922	D06	NINDS2	NINDS	1505316	Prothionamide	10 mM	302	324	36.755	60.185	16.646	0	0	-0.674	-0.027	false
01922:D07	1922	D07	NINDS2	NINDS	1504136	Alaproclate	10 mM	271	275	47.232	67.636	29.27	0	13.7	0.342	0.165	false
01922:D08	1922	D08	NINDS2	NINDS	1505317	Carmofur	10 mM	244	269	62.295	57.993	32.461	2.402	21.611	0.929	0.276	false
01922:D09	1922	D09	NINDS2	NINDS	1504137	Ancitabine hydrochloride	10 mM	238	271	36.555	52.03	10.516	3.572	0	-0.674	-0.027	false
01922:D10	1922	D10	NINDS2	NINDS	1505319	Clopidol	10 mM	264	312	32.576	66.667	18.557	0	0	-0.674	-0.027	false
01922:D11	1922	D11	NINDS2	NINDS	1504142	Acetriazoic acid	10 mM	259	314	25.483	39.49	6.253	0	0	-0.674	-0.027	false
01922:D12	1922	D12	NINDS2	NINDS	1505323	Carbimazole	10 mM	241	274	39.419	59.489	17.952	2.987	0	-0.674	-0.027	false
01922:D13	1922	D13	NINDS2	NINDS	1504144	Dirithromycin	10 mM	250	252	50.8	54.762	22.243	1.231	20.964	0.881	0.267	false
01922:D14	1922	D14	NINDS2	NINDS	1505327	Chlormadinone acetate	10 mM	272	301	85.662	90.698	72.436	0	70.99	4.591	0.968	true
01922:D15	1922	D15	NINDS2	NINDS	1504145	Gliclazide	10 mM	247	312	52.227	39.423	11.946	1.817	0	-0.674	-0.027	false
01922:D16	1922	D16	NINDS2	NINDS	1505329	Miltefosine	10 mM	311	335	38.264	48.06	8.765	0	2.404	-0.496	0.007	false
01922:D17	1922	D17	NINDS2	NINDS	1504148	Mepivacaine hydrochloride	10 mM	249	347	44.578	54.467	17.782	1.426	10.36	0.094	0.119	false
01922:D18	1922	D18	NINDS2	NINDS	1505330	Oxiconazole nitrate	10 mM	243	305	43.621	58.689	20.231	2.597	6.762	-0.173	0.068	false
01922:D19	1922	D19	NINDS2	NINDS	1504150	Meloxicam	10 mM	289	280	22.837	34.643	11.62	0	2.29	-0.505	0.006	false
01922:D20	1922	D20	NINDS2	NINDS	1505332	Azaperone	10 mM	291	331	21.306	49.245	1.935	0	0	-0.674	-0.027	false
01922:D21	1922	D21	NINDS2	NINDS	1504151	Nimustine	10 mM	294	312	20.408	44.551	5.996	0	0	-0.674	-0.027	false
01922:D22	1922	D22	NINDS2	NINDS	1505334	Securinine	10 mM	275	285	31.273	42.456	0.123	0	0	-0.674	-0.027	false
01922:E03	1922	E03	NINDS2	NINDS	1503085	Pyrithyldione	10 mM	345	319	40.58	42.633	6.358	0	5.364	-0.277	0.049	false
01922:E04	1922	E04	NINDS2	NINDS	1503600	Nimodipine	10 mM	350	255	46.571	72.549	32.429	0	11.637	0.189	0.136	false
01922:E05	1922	E05	NINDS2	NINDS	1503086	Tiapride hydrochloride	10 mM	300	318	35.667	47.17	6.339	0	0	-0.674	-0.027	false
01922:E06	1922	E06	NINDS2	NINDS	1503602	Salinomycin, sodium	10 mM	292	284	57.534	62.676	32.654	0	31.992	1.699	0.422	false
01922:E07	1922	E07	NINDS2	NINDS	1503092	Gluconolactone	10 mM	303	282	48.845	41.844	11.417	0	1.425	-0.569	-0.007	false
01922:E08	1922	E08	NINDS2	NINDS	1503603	Acyclovir	10 mM	246	306	23.577	48.693	0.791	2.012	0	-0.674	-0.027	false
01922:E09	1922	E09	NINDS2	NINDS	1503094	Tioxolone	10 mM	240	319	35	41.066	1.399	3.182	0	-0.674	-0.027	false
01922:E10	1922	E10	NINDS2	NINDS	1503604	Retinyl palmitate	10 mM	302	299	43.046	45.819	10.382	0	9.88	0.058	0.112	false
01922:E11	1922	E11	NINDS2	NINDS	1503100	Urapidil	10 mM	237	311	40.928	71.704	27.958	3.767	0	-0.674	-0.027	false
01922:E12	1922	E12	NINDS2	NINDS	1503607	Thalidomide	10 mM	260	252	28.846	37.698	5.274	0	0	-0.674	-0.027	false
01922:E13	1922	E13	NINDS2	NINDS	1503101	Azlocillin sodium	10 mM	244	255	27.049	45.882	0.487	2.402	0	-0.674	-0.027	false
01922:E14	1922	E14	NINDS2	NINDS	1503610	Benzalkonium chloride	10 mM	241	298	48.133	54.027	19.883	2.987	14.864	0.428	0.182	false
01922:E15	1922	E15	NINDS2	NINDS	1503104	Bendrofumethiazide	10 mM	267	325	36.704	80.615	31.624	0	0	-0.674	-0.027	false
01922:E16	1922	E16	NINDS2	NINDS	1503611	Pentoxifylline	10 mM	259	317	44.402	36.278	4.295	0	0	-0.674	-0.027	false
01922:E17	1922	E17	NINDS2	NINDS	1503106	Bepridil hydrochloride	10 mM	233	274	51.502	70.438	34.242	4.548	15.793	0.497	0.195	false
01922:E18	1922	E18	NINDS2	NINDS	1503614	Ciprofloxacin	10 mM	272	296	51.103	43.243	13.986	0	3.035	-0.449	0.016	false
01922:E19	1922	E19	NINDS2	NINDS	1503107	Bromhexine hydrochloride	10 mM	268	283	28.731	48.057	2.259	0	0	-0.674	-0.027	false
01922:E20	1922	E20	NINDS2	NINDS	1503428	Choline chloride	10 mM	306	310	32.353	43.871	1.654	0	0	-0.674	-0.027	false
01922:E21	1922	E21	NINDS2	NINDS	1503108	Bromopride	10 mM	284	310	27.113	40.968	4.055	0	0	-0.674	-0.027	false
01922:E22	1922	E22	NINDS2	NINDS	1503620	Safrole	10 mM	304	311	28.947	29.582	11.17	0	9.69	0.044	0.109	false
01922:F03	1922	F03	NINDS2	NINDS	1504152	Nilutamide	10 mM	315	299	28.571	54.181	6.65	0	0	-0.674	-0.027	false
01922:F04	1922	F04	NINDS2	NINDS	1505340	Azelastine hydrochloride	10 mM	240	274	87.5	96.35	77.844	3.182	72.698	4.718	0.992	true
01922:F05	1922	F05	NINDS2	NINDS	1504171	Venlafaxine	10 mM	298	328	46.309	60.061	23.073	0	13.614	0.335	0.164	false
01922:F06	1922	F06	NINDS2	NINDS	1505347	Riboflavin	10 mM	307	314	35.505	35.669	2.223	0	0	-0.674	-0.027	false
01922:F07	1922	F07	NINDS2	NINDS	1504173	Fluoxetine	10 mM	285	263	70.175	93.156	63.676	0	47.354	2.838	0.637	false
01922:F08	1922	F08	NINDS2	NINDS	1505354	Fipronil	10 mM	266	268	35.714	46.269	5.709	0	0	-0.674	-0.027	false
01922:F09	1922	F09	NINDS2	NINDS	1504174	Bupropion	10 mM	231	280	44.156	50.714	14.736	4.938	6.864	-0.165	0.07	false
01922:F10	1922	F10	NINDS2	NINDS	1505360	Cefditorin pivoxil	10 mM	262	266	24.809	48.12	0.371	0	0	-0.674	-0.027	false
01922:F11	1922	F11	NINDS2	NINDS	1504183	Trifluridine	10 mM	225	291	44.444	43.643	9.736	6.108	0	-0.674	-0.027	false
01922:F12	1922	F12	NINDS2	NINDS	1505361	Modafinil	10 mM	269	324	32.714	35.494	4.256	0	4.012	-0.377	0.03	false
01922:F13	1922	F13	NINDS2	NINDS	1504184	Aminolevulinic acid hydrochloride	10 mM	260	268	27.692	54.851	6.542	0	0	-0.674	-0.027	false
01922:F14	1922	F14	NINDS2	NINDS	1505365	Ceftriaxone sodium trihydrate	10 mM	265	236	34.717	46.186	4.968	0.185	0	-0.674	-0.027	false
01922:F15	1922	F15	NINDS2	NINDS	1504188	Pirenperone	10 mM	256	226	66.406	50	29.392	2.356	7.056	-0.151	0.072	false
01922:F16	1922	F16	NINDS2	NINDS	1505366	Ranolazine	10 mM	249	319	35.341	38.871	0.019	1.426	0	-0.674	-0.027	false
01922:F17	1922	F17	NINDS2	NINDS	1504190	Avobenzone	10 mM	299	292	37.458	43.151	4.608	0	2	-0.526	0.001	false
01922:F18	1922	F18	NINDS2	NINDS	270029	Prasterone acetate	10 mM	256	308	42.578	50	13.134	0.061	9.225	0.01	0.103	false
01922:F19	1922	F19	NINDS2	NINDS	1504210	Atovaquone	10 mM	291	318	32.302	41.824	0.115	0	0	-0.674	-0.027	false
01922:F20	1922	F20	NINDS2	NINDS	1505368	Valacyclovir hydrochloride	10 mM	311	299	30.225	44.482	0.651	0	0	-0.674	-0.027	false
01922:F21	1922	F21	NINDS2	NINDS	1504216	Zoxazolamine	10 mM	290	307	34.828	47.883	6.29	0	0	-0.674	-0.027	false
01922:F22	1922	F22	NINDS2	NINDS	1505369	Zolpidem	10 mM	295	302	21.017	31.126	15.446	0	7.562	-0.114	0.079	false
01922:G03	1922	G03	NINDS2	NINDS	1503111	Ceftriaxone sodium trihydrate	10 mM	303	318	52.805	53.774	22.885	0	20.01	0.81	0.254	false
01922:G04	1922	G04	NINDS2	NINDS	1503626	Oxotremorine sesquifumarate	10 mM	314	310	42.038	73.226	29.833	0	3.879	-0.387	0.028	false
01922:G05	1922	G05	NINDS2	NINDS	1503115	Vinpocetine	10 mM	310	272	59.032	79.044	45.704	0	31.341	1.65	0.413	false
01922:G06	1922	G06	NINDS2	NINDS	1503628	Pronetalol hydrochloride	10 mM	294	270	43.878	60	21.369	0	9.535	0.033	0.107	false
01922:G07	1922	G07	NINDS2	NINDS	1503117	Trimipramine maleate	10 mM	283	291	82.332	76.289	59.576	0	48.08	2.892	0.647	false
01922:G08	1922	G08	NINDS2	NINDS	1503636	N-methyl-d-aspartic acid (nmda)	10 mM	278	277	31.295	46.931	3.181	0	0	-0.674	-0.027	false
01922:G09	1922	G09	NINDS2	NINDS	1503121	Trazodone hydrochloride	10 mM	283	322	43.816	50.621	14.436	0	11.249	0.16	0.131	false
01922:G10	1922	G10	NINDS2	NINDS	1503650	Nabumetone	10 mM	284	339	35.915	45.428	5.229	0	0	-0.674	-0.027	false
01922:G11	1922	G11	NINDS2	NINDS	1503127	Dequalinium chloride	10 mM	216	242	44.907	54.132	17.76	7.864	4.541	-0.338	0.037	false
01922:G12	1922	G12	NINDS2	NINDS	1503679	Azithromycin	10 mM	234	228	72.222	67.982	46.575	6.226	31.25	1.644	0.411	false
01922:G13	1922	G13	NINDS2	NINDS	1503134	Menthol(-)	10 mM	291	307	32.99	38.436	1.905	0	0	-0.674	-0.027	false
01922:G14	1922	G14	NINDS2	NINDS	1503678	Celecoxib	10 mM	267	301	38.202	40.199	2.947	0	2.071	-0.521	0.002	false
01922:G15	1922	G15	NINDS2	NINDS	1503118	Triflupromazine hydrochloride	10 mM	273	273	75.458	81.685	58.851	0	58.463	3.662	0.792	false
01922:G16	1922	G16	NINDS2	NINDS	1503710	Clopidogrel sulfate	10 mM	292	293	34.589	38.908	0.467	0	0	-0.674	-0.027	false
01922:G17	1922	G17	NINDS2	NINDS	1503135	Thonzylamine hydrochloride	10 mM	292	305	41.096	40.984	5.498	0	2.456	-0.492	0.008	false
01922:G18	1922	G18	NINDS2	NINDS	1503720	Selamectin	10 mM	293	298	31.058	38.255	3.356	0	0	-0.674	-0.027	false
01922:G19	1922	G19	NINDS2	NINDS	1503136	Thiamphenicol	10 mM	265	293	34.717	30.034	6.901	0	0.071	-0.669	-0.026	false
01922:G20	1922	G20	NINDS2	NINDS	1503722	Atorvastatin calcium	10 mM	318	316	38.365	50.633	10.725	0	2.076	-0.521	0.003	false
01922:G21	1922	G21	NINDS2	NINDS	1503200	Cetrimonium bromide	10 mM	128	229	100	99.563	88.734	26.693	54.488	3.367	0.737	false
01922:G22	1922	G22	NINDS2	NINDS	1503801	Naproxol	10 mM	351	321	23.362	33.645	11.995	0	4.117	-0.369	0.031	false
01922:H03	1922	H03	NINDS2	NINDS	1504218	Acrisorcin	10 mM	187	208	89.305	87.019	72.219	19.616	44.098	2.597	0.591	false
01922:H04	1922	H04	NINDS2	NINDS	1505371	Cetirizine hydrochloride	10 mM	331	340	48.036	36.765	7.133	0	0	-0.674	-0.027	false
01922:H05	1922	H05	NINDS2	NINDS	1504226	Mercaptamine hydrochloride	10 mM	293	332	54.949	50	21.575	0	13.052	0.294	0.156	false
01922:H06	1922	H06	NINDS2	NINDS	1505801	Topiramate	10 mM	316	254	30.063	42.52	0.901	0	0	-0.674	-0.027	false
01922:H07	1922	H07	NINDS2	NINDS	1504229	Metaxalone	10 mM	307	284	49.186	41.197	11.174	0	0.241	-0.657	-0.023	false
01922:H08	1922	H08	NINDS2	NINDS	1505802	Gemifloxacin mesylate	10 mM	256	277	36.719	32.13	3.995	0.061	0	-0.674	-0.027	false
01922:H09	1922	H09	NINDS2	NINDS	1504231	Clarithromycin	10 mM	263	309	36.882	43.042	4.135	0	1.052	-0.596	-0.012	false
01922:H10	1922	H10	NINDS2	NINDS	1505803	Pravastatin sodium	10 mM	296	324	52.027	37.346	10.283	0	0	-0.674	-0.027	false
01922:H11	1922	H11	NINDS2	NINDS	1504235	Rofecoxib	10 mM	312	315	33.013	45.079	2.992	0	0	-0.674	-0.027	false
01922:H12	1922	H12	NINDS2	NINDS	1505805	Gabapentin	10 mM	249	291	30.12	43.643	0.037	1.426	0	-0.674	-0.027	false
01922:H13	1922	H13	NINDS2	NINDS	1504236	Simvastatin	10 mM	264	267	37.5	50.562	10.082	0	0.635	-0.627	-0.018	false
01922:H14	1922	H14	NINDS2	NINDS	1505814	Metformin hydrochloride	10 mM	288	280	36.111	42.5	3.211	0	0	-0.674	-0.027	false
01922:H15	1922	H15	NINDS2	NINDS	1504237	Hydroquinone	10 mM	269	278	62.825	51.439	28.006	0	12.943	0.286	0.155	false
01922:H16	1922	H16	NINDS2	NINDS	1505816	Pregabalin	10 mM	264	284	42.803	62.676	22.603	0	7.209	-0.14	0.074	false
01922:H17	1922	H17	NINDS2	NINDS	1504243	Oxcarbazepine	10 mM	298	326	39.933	33.742	0.617	0	0	-0.674	-0.027	false
01922:H18	1922	H18	NINDS2	NINDS	1505817	Ramelteon	10 mM	311	290	42.122	59.655	19.918	0	6.649	-0.181	0.067	false
01922:H19	1922	H19	NINDS2	NINDS	1504244	Betamipron	10 mM	354	316	30.791	35.759	5.372	0	2.96	-0.455	0.015	false
01922:H20	1922	H20	NINDS2	NINDS	1505818	Pantoprazole	10 mM	307	296	33.876	52.365	8.935	0	0	-0.674	-0.027	false
01922:H21	1922	H21	NINDS2	NINDS	1504257	Carvedilol tartrate	10 mM	280	296	50.714	57.095	23.899	0	21.6	0.928	0.276	false
01922:H22	1922	H22	NINDS2	NINDS	1505820	Topotecan hydrochloride	10 mM	267	297	48.689	50.505	17.675	0	15.881	0.504	0.196	false
01922:I03	1922	I03	NINDS2	NINDS	1503203	Chlorprothixene hydrochloride	10 mM	328	254	78.963	77.953	58.501	0	51.918	3.177	0.701	false
01922:I04	1922	I04	NINDS2	NINDS	1503802	Azadirachtin	10 mM	283	280	54.417	39.286	13.339	0	0	-0.674	-0.027	false
01922:I05	1922	I05	NINDS2	NINDS	1503204	Cinnarazine	10 mM	318	270	62.893	62.963	36.521	0	32.091	1.706	0.423	false
01922:I06	1922	I06	NINDS2	NINDS	1503804	Colforsin	10 mM	282	288	45.745	37.153	5.855	0	0	-0.674	-0.027	false
01922:I07	1922	I07	NINDS2	NINDS	1503205	Citiolone	10 mM	269	270	38.662	38.148	1.753	0	0	-0.674	-0.027	false
01922:I08	1922	I08	NINDS2	NINDS	1503806	Homidium bromide	10 mM	205	195	94.634	90.256	78.234	18.849	48.556	2.927	0.654	false
01922:I09	1922	I09	NINDS2	NINDS	1503206	Clofoctol	10 mM	280	254	37.857	36.22	0.212	0	0	-0.674	-0.027	false
01922:I10	1922	I10	NINDS2	NINDS	1503816	Amcinonide	10 mM	230	235	29.565	22.553	15.913	5.529	1.76	-0.544	-0.002	false
01922:I11	1922	I11	NINDS2	NINDS	1503207	Cyclobenzaprine hydrochloride	10 mM	275	222	80	74.324	56.542	3.14	42.414	2.472	0.568	false
01922:I12	1922	I12	NINDS2	NINDS	1503818	Bupivacaine hydrochloride	10 mM	265	253	47.925	37.154	7.343	0	0	-0.674	-0.027	false
01922:I13	1922	I13	NINDS2	NINDS	1503212	Dobutamine hydrochloride	10 mM	261	286	51.724	32.867	6.785	0	0	-0.674	-0.027	false
01922:I14	1922	I14	NINDS2	NINDS	1503821	Cystamine dihydrochloride	10 mM	271	291	40.59	39.519	4.076	0	0.18	-0.661	-0.024	false
01922:I15	1922	I15	NINDS2	NINDS	1503214	Edoxudine	10 mM	256	270	58.203	62.963	33.321	0.061	33	1.773	0.436	false
01922:I16	1922	I16	NINDS2	NINDS	1503822	Ramifenazone	10 mM	309	296	43.042	41.554	7.245	0	2.787	-0.468	0.012	false
01922:I17	1922	I17	NINDS2	NINDS	1503215	Enoxacin	10 mM	260	269	47.692	55.39	20.585	0	16.846	0.575	0.209	false
01922:I18	1922	I18	NINDS2	NINDS	1503325	Thiodiglycol	10 mM	305	265	47.869	55.094	20.488	0	17.2	0.601	0.214	false
01922:I19	1922	I19	NINDS2	NINDS	1503228	Paromomycin sulfate	10 mM	266	281	42.857	35.943	2.995	0	0	-0.674	-0.027	false
01922:I20	1922	I20	NINDS2	NINDS	1503705	Anethole	10 mM	253	291	43.874	46.048	11.114	0.646	9.351	0.019	0.104	false
01922:I21	1922	I21	NINDS2	NINDS	1503218	Heptaminol hydrochloride	10 mM	258	264	36.434	47.727	7.272	0	0	-0.674	-0.027	false
01922:I22	1922	I22	NINDS2	NINDS	1503902	Sodium beta-nicotinamide adenine dinucleotide phosphate	10 mM	304	326	35.855	41.104	2.011	0	0	-0.674	-0.027	false
01922:J03	1922	J03	NINDS2	NINDS	1504258	Nateglinide	10 mM	305	292	36.393	60.959	16.967	0	0	-0.674	-0.027	false
01922:J04	1922	J04	NINDS2	NINDS	1505821	Irinotecan hydrochloride	10 mM	266	260	63.158	57.692	32.829	0	23.24	1.049	0.299	false
01922:J05	1922	J05	NINDS2	NINDS	1504259	Irbesartan	10 mM	291	304	29.21	39.803	3.48	0	0	-0.674	-0.027	false
01922:J06	1922	J06	NINDS2	NINDS	1505822	Oseltamivir tartrate	10 mM	286	263	44.406	46.008	11.448	0	9.761	0.05	0.11	false
01922:J07	1922	J07	NINDS2	NINDS	1504260	Levofloxacin	10 mM	269	225	40.149	47.111	9.354	2.507	3.252	-0.433	0.019	false
01922:J08	1922	J08	NINDS2	NINDS	1505823	Tegaserod	10 mM	295	241	35.254	41.494	1.887	0	0	-0.674	-0.027	false
01922:J09	1922	J09	NINDS2	NINDS	1504261	Candesartan cilextil	10 mM	285	282	40	34.043	0.351	0	0	-0.674	-0.027	false
01922:J10	1922	J10	NINDS2	NINDS	1505308	Chlorophyllide cu complex na salt	10 mM	291	257	13.746	26.07	24.122	0	13.661	0.339	0.165	false
01922:J11	1922	J11	NINDS2	NINDS	1504263	Rosiglitazone	10 mM	260	270	90	32.222	32.427	0	0	-0.674	-0.027	false
01922:J12	1922	J12	NINDS2	NINDS	1505322	Cepharanthine	10 mM	234	234	92.735	94.017	79.702	4.959	69.304	4.466	0.944	true
01922:J13	1922	J13	NINDS2	NINDS	1504268	Losartan	10 mM	231	257	40.693	38.521	3.413	4.938	0	-0.674	-0.027	false
01922:J14	1922	J14	NINDS2	NINDS	2300205	Levodopa	10 mM	268	232	38.433	39.224	2.388	1.029	0	-0.674	-0.027	false
01922:J15	1922	J15	NINDS2	NINDS	1504272	Gatifloxacin	10 mM	298	262	39.933	33.969	0.45	0	0	-0.674	-0.027	false
01922:J16	1922	J16	NINDS2	NINDS	2300307	Verapamil hydrochloride	10 mM	279	256	70.609	71.484	48.048	0	43.813	2.576	0.587	false
01922:J17	1922	J17	NINDS2	NINDS	1504273	Miglitol	10 mM	302	290	45.364	52.414	16.809	0	13.506	0.327	0.163	false
01922:J18	1922	J18	NINDS2	NINDS	2300241	Loperamide hydrochloride	10 mM	276	304	75.725	85.855	62.098	0	58.104	3.636	0.787	false
01922:J19	1922	J19	NINDS2	NINDS	1504300	Orlistat	10 mM	277	302	69.314	83.775	56.195	0	47.722	2.866	0.642	false
01922:J20	1922	J20	NINDS2	NINDS	2300219	Edrophonium chloride	10 mM	287	252	34.146	41.27	0.966	0	0	-0.674	-0.027	false
01922:J21	1922	J21	NINDS2	NINDS	1504302	Valdecoxib	10 mM	276	298	41.304	44.631	8.32	0	8.183	-0.067	0.088	false
01922:J22	1922	J22	NINDS2	NINDS	2300009	Tilorone	10 mM	227	272	92.07	91.544	77.431	5.718	64.643	4.121	0.879	true
01922:K03	1922	K03	NINDS2	NINDS	1503219	Diosmin	10 mM	265	268	52.453	43.284	14.937	0	2.674	-0.476	0.011	false
01922:K04	1922	K04	NINDS2	NINDS	1503903	Albendazole	10 mM	317	291	43.533	37.801	4.822	0	0	-0.674	-0.027	false
01922:K05	1922	K05	NINDS2	NINDS	1503221	Ethisterone	10 mM	323	279	82.353	81.004	63.055	0	55.916	3.473	0.757	false
01922:K06	1922	K06	NINDS2	NINDS	1503906	Anisomycin	10 mM	244	193	93.443	92.228	78.87	11.663	59.4	3.732	0.806	false
01922:K07	1922	K07	NINDS2	NINDS	1503222	Fipexide hydrochloride	10 mM	309	274	46.278	41.241	9.223	0	1.238	-0.583	-0.009	false
01922:K08	1922	K08	NINDS2	NINDS	1503908	Paclitaxel	10 mM	209	200	74.163	62.5	43.87	17.013	10.727	0.121	0.124	false
01922:K09	1922	K09	NINDS2	NINDS	1503226	Meclofenoxate hydrochloride	10 mM	260	281	26.154	41.637	4.217	0	0	-0.674	-0.027	false
01922:K10	1922	K10	NINDS2	NINDS	1503914	Butacaine	10 mM	291	263	49.828	50.57	18.5	0	15.628	0.485	0.192	false
01922:K11	1922	K11	NINDS2	NINDS	1503227	Perhexiline maleate	10 mM	287	238	70.732	71.008	47.781	0	42.983	2.514	0.576	false
01922:K12	1922	K12	NINDS2	NINDS	1503918	Clobetasol propionate	10 mM	239	237	23.431	27.426	16.518	3.377	11.105	0.149	0.129	false
01922:K13	1922	K13	NINDS2	NINDS	1503229	Methapyrilene hydrochloride	10 mM	253	234	56.917	55.128	26.686	1.253	19.704	0.787	0.249	false
01922:K14	1922	K14	NINDS2	NINDS	1503920	Cloperastine hydrochloride	10 mM	249	252	73.494	71.032	49.683	1.426	40.717	2.346	0.544	false
01922:K15	1922	K15	NINDS2	NINDS	1503230	Nifenazone	10 mM	272	309	43.015	34.304	1.899	0	0	-0.674	-0.027	false
01922:K16	1922	K16	NINDS2	NINDS	1503921	Cyproterone	10 mM	299	281	49.498	46.263	15.11	0	8.569	-0.039	0.093	false
01922:K17	1922	K17	NINDS2	NINDS	1503231	Nimesulide	10 mM	343	267	45.481	31.835	1.767	0	0	-0.674	-0.027	false
01922:K18	1922	K18	NINDS2	NINDS	1503922	Tryptamine	10 mM	287	272	50.871	63.235	28.518	0	20.674	0.859	0.263	false
01922:K19	1922	K19	NINDS2	NINDS	1503234	Beta-propiolactone	10 mM	330	331	39.394	31.722	2.469	0	0	-0.674	-0.027	false
01922:K20	1922	K20	NINDS2	NINDS	1503923	Iopanic acid	10 mM	321	319	61.994	32.288	13.367	0	0	-0.674	-0.027	false
01922:K21	1922	K21	NINDS2	NINDS	1503237	Halcinonide	10 mM	281	291	20.285	24.742	20.637	0	17.947	0.657	0.225	false
01922:K22	1922	K22	NINDS2	NINDS	1503925	Ketorolac tromethamine	10 mM	297	310	45.791	42.581	9.875	0	3.621	-0.406	0.024	false
01922:L03	1922	L03	NINDS2	NINDS	1504303	Moxifloxacin hydrochloride	10 mM	324	274	42.284	60.219	20.443	0	6.812	-0.169	0.069	false
01922:L04	1922	L04	NINDS2	NINDS	2300259	Nicotine ditartrate	10 mM	273	289	47.985	43.945	12.374	0	5.193	-0.289	0.046	false
01922:L05	1922	L05	NINDS2	NINDS	1504401	Pioglitazone hydrochloride	10 mM	300	279	52.333	37.276	10.441	0	0	-0.674	-0.027	false
01922:L06	1922	L06	NINDS2	NINDS	2300228	Kainic acid	10 mM	308	264	42.532	40.53	6.145	0	1.246	-0.582	-0.009	false
01922:L07	1922	L07	NINDS2	NINDS	1505200	Benazepril hydrochloride	10 mM	303	289	59.076	42.561	18.924	0	0	-0.674	-0.027	false
01922:L08	1922	L08	NINDS2	NINDS	2300229	Glyburide	10 mM	294	217	50.34	45.622	15.214	4.195	3.039	-0.449	0.016	false
01922:L09	1922	L09	NINDS2	NINDS	1505201	Famciclovir	10 mM	308	308	41.558	48.052	11.007	0	7.948	-0.085	0.085	false
01922:L10	1922	L10	NINDS2	NINDS	2300270	Pinacidil	10 mM	330	278	37.576	44.964	6.021	0	1.846	-0.538	-0.001	false
01922:L11	1922	L11	NINDS2	NINDS	1505203	Ezetimibe	10 mM	320	274	36.875	36.861	0.411	0	0	-0.674	-0.027	false
01922:L12	1922	L12	NINDS2	NINDS	2300094	Astemizole	10 mM	239	212	96.234	95.283	83.019	8.628	66.63	4.268	0.907	true
01922:L13	1922	L13	NINDS2	NINDS	1505204	Almotriptan	10 mM	255	276	30.588	32.971	7.56	0.256	7.277	-0.135	0.075	false
01922:L14	1922	L14	NINDS2	NINDS	2300242	Loxapine succinate	10 mM	258	251	61.24	71.315	41.53	0	36.553	2.037	0.486	false
01922:L15	1922	L15	NINDS2	NINDS	1505205	Olmesartan medoxomil	10 mM	284	261	51.761	62.069	28.268	0	22.396	0.987	0.287	false
01922:L16	1922	L16	NINDS2	NINDS	2300325	Metolazone	10 mM	277	269	54.874	33.457	9.368	0	0	-0.674	-0.027	false
01922:L17	1922	L17	NINDS2	NINDS	1505207	Ceftibuten	10 mM	305	249	38.689	35.743	0.004	0	0	-0.674	-0.027	false
01922:L18	1922	L18	NINDS2	NINDS	2300214	Diltiazem hydrochloride	10 mM	275	284	71.636	61.972	41.758	0	27.664	1.378	0.361	false
01922:L19	1922	L19	NINDS2	NINDS	1505208	Cefdinir	10 mM	310	285	36.452	48.772	8.052	0	0	-0.674	-0.027	false
01922:L20	1922	L20	NINDS2	NINDS	2300309	Vesamicol hydrochloride	10 mM	302	292	46.358	39.384	7.912	0	0	-0.674	-0.027	false
01922:L21	1922	L21	NINDS2	NINDS	1505209	Valsartan	10 mM	310	265	35.484	66.038	20.079	0	0	-0.674	-0.027	false
01922:L22	1922	L22	NINDS2	NINDS	2300206	Diazoxide	10 mM	287	262	32.404	24.809	12.318	0	2.95	-0.456	0.015	false
01922:M03	1922	M03	NINDS2	NINDS	1503239	Hycanthone	10 mM	248	169	69.758	76.331	51.028	15.949	33.962	1.845	0.449	false
01922:M04	1922	M04	NINDS2	NINDS	1503926	Lansoprazole	10 mM	289	270	41.522	42.963	7.243	0	5.613	-0.258	0.052	false
01922:M05	1922	M05	NINDS2	NINDS	1503240	Pyridostigmine bromide	10 mM	315	275	37.778	37.818	0.908	0	0	-0.674	-0.027	false
01922:M06	1922	M06	NINDS2	NINDS	1503927	Lefunomide	10 mM	319	292	43.887	37.671	4.968	0	0	-0.674	-0.027	false
01922:M07	1922	M07	NINDS2	NINDS	1503242	Isoxicam	10 mM	295	269	37.288	38.29	0.92	0	0	-0.674	-0.027	false
01922:M08	1922	M08	NINDS2	NINDS	1503931	Morantel citrate	10 mM	275	245	44	43.265	9.156	0	5.329	-0.279	0.048	false
01922:M09	1922	M09	NINDS2	NINDS	1503244	Lasalocid sodium	10 mM	281	255	77.224	76.078	55.937	0	49.353	2.987	0.665	false
01922:M10	1922	M10	NINDS2	NINDS	1503932	Oxyphencyclimine hydrochloride	10 mM	290	234	61.379	64.53	36.64	0.607	34.571	1.89	0.458	false
01922:M11	1922	M11	NINDS2	NINDS	1503245	Levamisole hydrochloride	10 mM	261	232	40.613	46.552	9.26	1.029	5.619	-0.258	0.052	false
01922:M12	1922	M12	NINDS2	NINDS	1503933	Pentolinium tartrate	10 mM	259	276	30.116	35.145	6.285	0	3.767	-0.395	0.026	false
01922:M13	1922	M13	NINDS2	NINDS	1503243	Labetalol hydrochloride	10 mM	288	240	48.958	49.167	16.875	0	13.57	0.332	0.164	false
01922:M14	1922	M14	NINDS2	NINDS	1503934	Perphenazine	10 mM	268	266	94.776	90.226	78.308	0	67.309	4.318	0.916	true
01922:M15	1922	M15	NINDS2	NINDS	1503250	Mephentermine sulfate	10 mM	291	279	64.261	48.387	26.744	0	7.411	-0.125	0.077	false
01922:M16	1922	M16	NINDS2	NINDS	1503935	Propafenone hydrochloride	10 mM	286	258	83.217	64.341	51.401	0	27.926	1.397	0.365	false
01922:M17	1922	M17	NINDS2	NINDS	1503251	Metaraminol bitartrate	10 mM	337	284	42.433	33.451	0.875	0	0	-0.674	-0.027	false
01922:M18	1922	M18	NINDS2	NINDS	1503936	Periciazine	10 mM	278	248	76.619	52.016	37.842	0	9.522	0.032	0.107	false
01922:M19	1922	M19	NINDS2	NINDS	1503252	Methazolamide	10 mM	271	279	34.317	30.824	6.593	0	0.897	-0.608	-0.014	false
01922:M20	1922	M20	NINDS2	NINDS	1503939	Ribostamycin sulfate	10 mM	292	304	34.247	22.368	12.855	0	0	-0.674	-0.027	false
01922:M21	1922	M21	NINDS2	NINDS	1503253	Methylbenzethonium chloride	10 mM	280	248	68.214	57.661	36.256	0	21.582	0.926	0.276	false
01922:M22	1922	M22	NINDS2	NINDS	1503941	Thioctic acid	10 mM	323	283	36.533	33.216	3.324	0	0	-0.674	-0.027	false
01922:N03	1922	N03	NINDS2	NINDS	1505210	Sibutramine hydrochloride	10 mM	299	278	60.535	50	25.387	0	11.278	0.162	0.131	false
01922:N04	1922	N04	NINDS2	NINDS	2300212	Domperidone	10 mM	345	248	59.71	46.774	22.453	0	6.174	-0.216	0.06	false
01922:N05	1922	N05	NINDS2	NINDS	1505211	Torsemide	10 mM	333	269	35.736	43.866	3.959	0	0	-0.674	-0.027	false
01922:N06	1922	N06	NINDS2	NINDS	1600654	Chaulmosulfone	10 mM	339	283	36.283	49.47	8.45	0	0	-0.674	-0.027	false
01922:N07	1922	N07	NINDS2	NINDS	1505212	Perindopril erbumine	10 mM	289	269	47.405	73.978	34.047	0	12.762	0.272	0.152	false
01922:N08	1922	N08	NINDS2	NINDS	100537	Solasodine	10 mM	289	279	33.91	41.577	1.031	0	0	-0.674	-0.027	false
01922:N09	1922	N09	NINDS2	NINDS	1505213	Rosuvastatin	10 mM	324	268	35.802	37.313	0.811	0	0	-0.674	-0.027	false
01922:N10	1922	N10	NINDS2	NINDS	100346	Picrotin	10 mM	309	250	45.307	50.4	15.291	0	13.8	0.349	0.167	false
01922:N11	1922	N11	NINDS2	NINDS	1505215	Tegaserod maleate	10 mM	274	259	37.591	33.591	2.326	0	0	-0.674	-0.027	false
01922:N12	1922	N12	NINDS2	NINDS	100318	Diosgenin	10 mM	296	276	38.176	23.913	9.039	0	0	-0.674	-0.027	false
01922:N13	1922	N13	NINDS2	NINDS	1504021	Lupinine	10 mM	313	245	33.546	31.429	6.675	0	2.311	-0.503	0.006	false
01922:N14	1922	N14	NINDS2	NINDS	1505039	2,5-di-t-butyl-4-hydroxyanisole	10 mM	227	192	83.7	78.646	62.242	15.19	36.376	2.024	0.483	false
01922:N15	1922	N15	NINDS2	NINDS	1505230	Cilostazol	10 mM	307	286	44.625	30.769	0.4	0	0	-0.674	-0.027	false
01922:N16	1922	N16	NINDS2	NINDS	100525	Crinamine	10 mM	288	252	79.514	79.762	60.206	0	54.753	3.387	0.74	false
01922:N17	1922	N17	NINDS2	NINDS	1505244	Citicoline	10 mM	385	266	41.299	32.707	0.446	0	0	-0.674	-0.027	false
01922:N18	1922	N18	NINDS2	NINDS	102007	Formononetin	10 mM	328	295	57.927	31.864	10.28	0	0	-0.674	-0.027	false
01922:N19	1922	N19	NINDS2	NINDS	1505245	Troxerutin	10 mM	364	293	31.319	30.375	8.969	0	5.854	-0.24	0.055	false
01922:N20	1922	N20	NINDS2	NINDS	100032	Gedunin	10 mM	318	283	65.094	54.417	31.743	0	17.176	0.6	0.214	false
01922:N21	1922	N21	NINDS2	NINDS	1505248	Canrenone	10 mM	292	305	38.014	33.77	1.906	0	0	-0.674	-0.027	false
01922:N22	1922	N22	NINDS2	NINDS	102076	Imperatorin	10 mM	306	317	28.105	21.767	17.488	0	9.594	0.037	0.108	false
01922:O03	1922	O03	NINDS2	NINDS	1503257	Midodrine hydrochloride	10 mM	296	252	36.149	44.444	4.665	0	0	-0.674	-0.027	false
01922:O04	1922	O04	NINDS2	NINDS	1503947	Cacodylic acid	10 mM	296	262	43.243	42.748	8.259	0	4.709	-0.325	0.039	false
01922:O05	1922	O05	NINDS2	NINDS	1503260	Nadolol	10 mM	347	263	43.228	67.681	26.57	0	6.954	-0.159	0.071	false
01922:O06	1922	O06	NINDS2	NINDS	1503954	Tulobuterol	10 mM	305	283	43.607	39.223	5.917	0	0	-0.674	-0.027	false
01922:O07	1922	O07	NINDS2	NINDS	1503262	Naltrexone hydrochloride	10 mM	300	222	54	40.541	13.977	3.14	0	-0.674	-0.027	false
01922:O08	1922	O08	NINDS2	NINDS	1503973	2-thiouracil	10 mM	323	287	32.817	43.206	1.482	0	0	-0.674	-0.027	false
01922:O09	1922	O09	NINDS2	NINDS	1503266	Nocodazole	10 mM	282	242	44.326	48.347	13.113	0	12.547	0.256	0.149	false
01922:O10	1922	O10	NINDS2	NINDS	1503975	Fluconazole	10 mM	346	263	31.792	51.331	6.753	0	0	-0.674	-0.027	false
01922:O11	1922	O11	NINDS2	NINDS	1503267	Nomifensine maleate	10 mM	337	231	40.653	35.065	0.846	1.24	0	-0.674	-0.027	false
01922:O12	1922	O12	NINDS2	NINDS	1503978	Hydroxychloroquine sulfate	10 mM	310	256	44.839	48.438	13.529	0	13.392	0.319	0.161	false
01922:O13	1922	O13	NINDS2	NINDS	1503269	Pergolide mesylate	10 mM	253	214	45.455	77.103	35.013	5.475	3.401	-0.422	0.021	false
01922:O14	1922	O14	NINDS2	NINDS	1503982	Agmatine sulfate	10 mM	327	272	23.242	33.088	12.486	0	5.005	-0.303	0.044	false
01922:O15	1922	O15	NINDS2	NINDS	1503270	Prilocaine hydrochloride	10 mM	323	276	52.322	39.493	12.062	0	0	-0.674	-0.027	false
01922:O16	1922	O16	NINDS2	NINDS	1503985	Brompheniramine maleate	10 mM	294	244	62.585	56.557	31.604	0	21.534	0.923	0.275	false
01922:O17	1922	O17	NINDS2	NINDS	1503273	Hydrocortisone butyrate	10 mM	319	283	22.257	18.375	23.97	0	18.774	0.718	0.236	false
01922:O18	1922	O18	NINDS2	NINDS	1503991	Clebopride maleate	10 mM	329	239	39.818	56.485	16.017	0	3.386	-0.423	0.021	false
01922:O19	1922	O19	NINDS2	NINDS	1503276	Roxithromycin	10 mM	341	285	48.68	24.912	1.137	0	0	-0.674	-0.027	false
01922:O20	1922	O20	NINDS2	NINDS	1503994	Convallatoxin	10 mM	229	205	89.956	85.366	71.449	12.056	48.7	2.938	0.656	false
01922:O21	1922	O21	NINDS2	NINDS	1503278	Mitoxanthrone hydrochloride	10 mM	38	33	52.632	69.697	34.468	85.621	0	-0.674	-0.027	false
01922:O22	1922	O22	NINDS2	NINDS	1504002	Baicalein	10 mM	306	288	37.255	25.694	8.358	0	0	-0.674	-0.027	false
01922:P03	1922	P03	NINDS2	NINDS	1505249	Apramycin	10 mM	294	265	19.388	33.962	14.473	0	2.326	-0.502	0.006	false
01922:P04	1922	P04	NINDS2	NINDS	107108	5alpha-androstan-3,17-dione	10 mM	294	268	32.313	39.925	1.273	0	0	-0.674	-0.027	false
01922:P05	1922	P05	NINDS2	NINDS	1505256	Silibinin	10 mM	292	245	26.027	38.776	6.406	0	0	-0.674	-0.027	false
01922:P06	1922	P06	NINDS2	NINDS	107113	Androsterone acetate	10 mM	276	224	35.87	34.821	2.596	2.718	0	-0.674	-0.027	false
01922:P07	1922	P07	NINDS2	NINDS	1505261	Telmisartan	10 mM	258	217	28.295	20.737	18.114	4.195	4.88	-0.313	0.042	false
01922:P08	1922	P08	NINDS2	NINDS	200208	Asarylaldehyde	10 mM	256	250	29.297	23.6	15.327	0.061	7.882	-0.09	0.084	false
01922:P09	1922	P09	NINDS2	NINDS	1505262	Sertraline hydrochloride	10 mM	273	286	55.311	56.993	26.961	0	24.569	1.148	0.318	false
01922:P10	1922	P10	NINDS2	NINDS	200022	Aklavine hydrochloride	10 mM	174	166	82.759	77.108	60.47	31.017	18.291	0.682	0.23	false
01922:P11	1922	P11	NINDS2	NINDS	1505263	Alfluzocin	10 mM	232	231	28.879	29.004	11.64	5.983	3.71	-0.399	0.025	false
01922:P12	1922	P12	NINDS2	NINDS	200499	Acacetin	10 mM	287	203	34.843	22.66	12.233	7.15	0	-0.674	-0.027	false
01922:P13	1922	P13	NINDS2	NINDS	1505264	Trandolapril	10 mM	259	232	24.324	19.828	21.492	1.029	14.549	0.405	0.177	false
01922:P14	1922	P14	NINDS2	NINDS	200701	Benzylhydrazine hydrochloride	10 mM	282	235	19.149	14.468	28.961	0.396	22.85	1.021	0.294	false
01922:P15	1922	P15	NINDS2	NINDS	1505265	Telithromycin	10 mM	265	250	48.679	32	4.07	0	0	-0.674	-0.027	false
01922:P16	1922	P16	NINDS2	NINDS	200413	2,6-dimethoxyquinone	10 mM	94	126	98.936	97.619	86.58	55.067	23.218	1.048	0.299	false
01922:P17	1922	P17	NINDS2	NINDS	1505267	Oxaprozin	10 mM	291	271	25.43	12.915	25.817	0	12.38	0.244	0.147	false
01922:P18	1922	P18	NINDS2	NINDS	200789	Daidzein	10 mM	236	277	43.644	16.245	10.942	3.962	0	-0.674	-0.027	false
01922:P19	1922	P19	NINDS2	NINDS	1505270	Propranolol hydrochloride (+/-)	10 mM	254	247	65.354	65.182	39.831	0.451	34.549	1.888	0.457	false
01922:P20	1922	P20	NINDS2	NINDS	200258	2',4'-dihydroxychalcone 4'-glucoside	10 mM	297	274	22.896	17.883	23.895	0	17.605	0.631	0.22	false
01922:P21	1922	P21	NINDS2	NINDS	1505271	Crotamiton	10 mM	231	299	36.364	28.428	6.957	4.938	0	-0.674	-0.027	false
01922:P22	1922	P22	NINDS2	NINDS	200846	Apigenin	10 mM	306	269	29.085	36.431	6.043	0	1.3	-0.578	-0.008	false
01923:A03	1923	A03	NINDS2	NINDS	201315	7,8-dihydroxyflavone	10 mM	272	275	37.132	44.364	13.818	0	9.288	0.208	0.129	false
01923:A05	1923	A05	NINDS2	NINDS	201138	Deguelin(-)	10 mM	267	242	28.09	31.818	1.547	0	0	-0.674	0	false
01923:A07	1923	A07	NINDS2	NINDS	201606	Rutilantinone	10 mM	233	228	37.768	32.018	5.237	7.702	0	-0.674	0	false
01923:A09	1923	A09	NINDS2	NINDS	201580	Pomiferin	10 mM	226	222	74.336	63.063	52.995	10.298	27.584	1.945	0.384	false
01923:A11	1923	A11	NINDS2	NINDS	201716	Norstictic acid	10 mM	231	197	16.883	22.843	15.79	14.556	0	-0.674	0	false
01923:A13	1923	A13	NINDS2	NINDS	201664	Celastrol	10 mM	66	115	100	100	97.577	63.333	28.154	2	0.392	false
01923:A15	1923	A15	NINDS2	NINDS	201602	Pachyrrhizin	10 mM	297	331	38.047	52.87	20.659	0	9.055	0.186	0.126	false
01923:A17	1923	A17	NINDS2	NINDS	201605	Bisanhydrorutilantinone	10 mM	276	268	35.507	38.06	8.099	0	7.864	0.072	0.11	false
01923:A19	1923	A19	NINDS2	NINDS	201604	Pyrromycin	10 mM	101	84	56.436	70.238	45.957	63.087	0	-0.674	0	false
01923:A21	1923	A21	NINDS2	NINDS	210031	Phenylacetohydroxamic acid	10 mM	310	268	35.161	25.373	1.404	0	0	-0.674	0	false
01923:C03	1923	C03	NINDS2	NINDS	210850	Alizarin	10 mM	322	305	46.273	28.197	8.28	0	0	-0.674	0	false
01923:C05	1923	C05	NINDS2	NINDS	210186	Citrinin	10 mM	316	240	38.608	29.583	4.035	0	0	-0.674	0	false
01923:C07	1923	C07	NINDS2	NINDS	210505	Purpurogallin	10 mM	292	285	34.932	27.719	0.152	0	0	-0.674	0	false
01923:C09	1923	C09	NINDS2	NINDS	210025	Avocatin a	10 mM	264	287	59.848	33.798	21.683	0	0	-0.674	0	false
01923:C11	1923	C11	NINDS2	NINDS	210800	Chlorogenic acid	10 mM	287	257	43.902	22.568	2.543	0	0	-0.674	0	false
01923:C13	1923	C13	NINDS2	NINDS	1505034	Baccatin iii	10 mM	287	250	30.314	38.8	5.078	0	0	-0.674	0	false
01923:C15	1923	C15	NINDS2	NINDS	211425	Hydroxyamphetamine hydrobromide	10 mM	242	275	35.537	22.909	2.946	3.562	0	-0.674	0	false
01923:C17	1923	C17	NINDS2	NINDS	1505038	Kasugamycin hydrochloride	10 mM	297	241	22.559	17.012	16.155	0	9.573	0.235	0.133	false
01923:C19	1923	C19	NINDS2	NINDS	210400	Tyramine	10 mM	282	260	21.277	31.923	6.144	0	0	-0.674	0	false
01923:C21	1923	C21	NINDS2	NINDS	212093	Magnocurarine iodide	10 mM	302	319	23.51	18.809	14.191	0	8.344	0.118	0.116	false
01923:E03	1923	E03	NINDS2	NINDS	211950	Cosmosiin	10 mM	326	298	46.933	53.356	27.108	0	23.934	1.599	0.333	false
01923:E05	1923	E05	NINDS2	NINDS	200007	Gambogic acid	10 mM	162	123	100	100	97.577	43.242	48.246	3.908	0.672	false
01923:E07	1923	E07	NINDS2	NINDS	100291	Strophanthidin	10 mM	253	269	89.328	92.193	84.555	1.451	80.355	6.957	1.119	true
01923:E09	1923	E09	NINDS2	NINDS	200046	Griseofulvin	10 mM	260	253	35.385	33.597	4.756	0.108	0.814	-0.597	0.011	false
01923:E11	1923	E11	NINDS2	NINDS	231043	1,3,5-trimethoxybenzene	10 mM	302	276	26.159	44.203	6.174	0	0	-0.674	0	false
01923:E13	1923	E13	NINDS2	NINDS	1504187	Telenzepine hydrochloride	10 mM	257	257	35.409	42.802	11.495	0.684	6.025	-0.102	0.084	false
01923:E15	1923	E15	NINDS2	NINDS	300010	Agelasine (stereochemistry of diterpene unknown)	10 mM	251	252	49.402	70.238	41.133	1.835	22.739	1.485	0.317	false
01923:E17	1923	E17	NINDS2	NINDS	300013	Pimpinellin	10 mM	308	257	33.117	22.568	4.855	0	0	-0.674	0	false
01923:E19	1923	E19	NINDS2	NINDS	300024	Hydrocortisone	10 mM	275	258	52	17.442	4.353	0	0	-0.674	0	false
01923:E21	1923	E21	NINDS2	NINDS	300029	Desoxycorticosterone acetate	10 mM	314	304	38.217	35.855	8.348	0	3.803	-0.313	0.053	false
01923:G03	1923	G03	NINDS2	NINDS	300034	Testosterone propionate	10 mM	332	329	57.53	69.301	46.023	0	38.473	2.98	0.536	false
01923:G05	1923	G05	NINDS2	NINDS	300037	Crassin acetate	10 mM	277	235	84.838	87.66	78.163	0.952	74.695	6.42	1.04	true
01923:G07	1923	G07	NINDS2	NINDS	300038	Juglone	10 mM	278	270	55.396	89.259	59.137	0	30.708	2.242	0.428	false
01923:G09	1923	G09	NINDS2	NINDS	300047	Anisodamine	10 mM	328	271	25.915	24.354	8.491	0	5.447	-0.157	0.076	false
01923:G11	1923	G11	NINDS2	NINDS	300061	Eupatoriochromene	10 mM	289	292	26.644	26.712	6.268	0	4.711	-0.227	0.066	false
01923:G13	1923	G13	NINDS2	NINDS	300546	Bergapten	10 mM	279	283	41.577	34.982	10.015	0	1.29	-0.552	0.018	false
01923:G15	1923	G15	NINDS2	NINDS	300548	Sparteine sulfate	10 mM	297	299	34.343	41.472	9.793	0	5.19	-0.182	0.072	false
01923:G17	1923	G17	NINDS2	NINDS	300565	Metergoline	10 mM	288	237	94.444	89.873	86.37	0.535	75.791	6.524	1.055	true
01923:G19	1923	G19	NINDS2	NINDS	307057	Bisabolol	10 mM	294	283	27.551	28.269	4.509	0	3.506	-0.342	0.049	false
01923:G21	1923	G21	NINDS2	NINDS	310035	Sanguinarine sulfate	10 mM	93	54	100	100	97.577	70.883	20.604	1.282	0.287	false
01923:I03	1923	I03	NINDS2	NINDS	310039	Alpha-tochopherol	10 mM	309	286	30.421	38.811	5.159	0	0	-0.674	0	false
01923:I05	1923	I05	NINDS2	NINDS	310040	Alpha-tochopheryl acetate	10 mM	306	294	50	40.816	20.053	0	8.384	0.122	0.117	false
01923:I07	1923	I07	NINDS2	NINDS	310050	Quinine ethyl carbonate	10 mM	304	278	68.092	52.878	41.273	0	22.838	1.495	0.318	false
01923:I09	1923	I09	NINDS2	NINDS	330001	Dactinomycin	10 mM	51	56	70.588	75	59.143	78.526	0	-0.674	0	false
01923:I11	1923	I11	NINDS2	NINDS	330002	Mitomycin c	10 mM	249	232	39.759	47.414	17.848	3.797	9.283	0.207	0.129	false
01923:I13	1923	I13	NINDS2	NINDS	1503105	Benfotiamine	10 mM	286	281	23.776	32.028	4.352	0	0	-0.674	0	false
01923:I15	1923	I15	NINDS2	NINDS	1503142	Tenoxicam	10 mM	302	326	30.795	63.19	23.222	0	0	-0.674	0	false
01923:I17	1923	I17	NINDS2	NINDS	1501157	Suxibuzone	10 mM	326	313	44.479	32.907	10.49	0	0	-0.674	0	false
01923:I19	1923	I19	NINDS2	NINDS	1505036	Tanshinone iia sulfonate sodium	10 mM	328	269	29.268	33.829	0.73	0	0	-0.674	0	false
01923:I21	1923	I21	NINDS2	NINDS	1500279	Erythromycin ethylsuccinate	10 mM	243	292	34.568	33.562	4.17	3.37	0	-0.674	0	false
01923:K03	1923	K03	NINDS2	NINDS	1500998	Ethoxyquin	10 mM	305	231	27.541	45.887	8.352	1.787	0	-0.674	0	false
01923:K05	1923	K05	NINDS2	NINDS	1503202	Chloroxine	10 mM	289	253	35.64	53.755	19.654	0	4.813	-0.217	0.067	false
01923:K07	1923	K07	NINDS2	NINDS	210369	Gallic acid	10 mM	291	312	16.495	34.295	7.691	0	0	-0.674	0	false
01923:K09	1923	K09	NINDS2	NINDS	1500427	Neomycin sulfate	10 mM	264	281	20.833	46.619	4.286	0	0	-0.674	0	false
01923:K11	1923	K11	NINDS2	NINDS	1500762	Rosolic acid	10 mM	273	272	61.538	55.147	38.435	0	28.686	2.05	0.399	false
01923:K13	1923	K13	NINDS2	NINDS	1504269	Lithium citrate	10 mM	295	284	20.678	29.577	8.268	0	1.169	-0.563	0.016	false
01923:K15	1923	K15	NINDS2	NINDS	1500759	Quinalizarin	10 mM	337	319	49.555	34.169	14.893	0	0	-0.674	0	false
01923:K17	1923	K17	NINDS2	NINDS	330071	Lindane	10 mM	327	295	26.606	46.102	7.867	0	0	-0.674	0	false
01923:K19	1923	K19	NINDS2	NINDS	330082	Mitotane	10 mM	319	302	59.875	58.278	39.581	0	34.435	2.596	0.479	false
01923:K21	1923	K21	NINDS2	NINDS	330008	2,4-dinitrophenol	10 mM	317	328	22.082	32.317	5.304	0	0	-0.674	0	false
01923:M03	1923	M03	NINDS2	NINDS	1505234	Avocadyne	10 mM	308	315	33.117	54.603	18.543	0	0.382	-0.638	0.005	false
01923:M05	1923	M05	NINDS2	NINDS	210206	Epicatechin	10 mM	333	321	39.94	36.76	10.191	0	4.772	-0.221	0.066	false
01923:M07	1923	M07	NINDS2	NINDS	210866	Khellin	10 mM	302	308	59.603	51.623	34.533	0	23.411	1.549	0.326	false
01923:M09	1923	M09	NINDS2	NINDS	211175	Metacetamol	10 mM	270	289	48.889	34.256	14.5	0	0	-0.674	0	false
01923:M11	1923	M11	NINDS2	NINDS	1400208	Coumarin	10 mM	315	252	31.111	40.079	6.559	0	0.031	-0.672	0	false
01923:M13	1923	M13	NINDS2	NINDS	1500408	Methylthiouracil	10 mM	282	317	32.624	23.975	4.166	0	0	-0.674	0	false
01923:M15	1923	M15	NINDS2	NINDS	1503427	Aloin	10 mM	306	297	52.614	35.69	18.103	0	0	-0.674	0	false
01923:M17	1923	M17	NINDS2	NINDS	1504100	Methoprene (s)	10 mM	316	267	35.443	39.326	8.98	0	7.492	0.037	0.104	false
01923:M19	1923	M19	NINDS2	NINDS	1503904	Patulin	10 mM	253	262	95.257	97.328	92.372	1.451	87.065	7.595	1.212	true
01923:M21	1923	M21	NINDS2	NINDS	1505031	Gardenin b	10 mM	298	351	42.953	71.51	37.638	0	13.436	0.602	0.187	false
01923:O03	1923	O03	NINDS2	NINDS	1503042	Artemisinin	10 mM	306	308	39.216	53.571	21.973	0	10.879	0.359	0.151	false
01923:O05	1923	O05	NINDS2	NINDS	1504410	Picropodophyllotoxin	10 mM	220	246	69.545	66.26	52.044	7.784	36.94	2.834	0.514	false
01923:O07	1923	O07	NINDS2	NINDS	1503114	Dibekacin	10 mM	339	329	35.398	37.69	7.754	0	7.751	0.062	0.108	false
01923:O09	1923	O09	NINDS2	NINDS	1501133	Nicergoline	10 mM	312	273	64.423	74.725	54.713	0	48.961	3.976	0.682	false
01923:O11	1923	O11	NINDS2	NINDS	1505346	Ketanserin tartrate	10 mM	287	235	22.648	59.574	14.993	0.952	0	-0.674	0	false
01923:O13	1923	O13	NINDS2	NINDS	1503977	Lovastatin	10 mM	290	270	40.345	63.704	30.148	0	10.668	0.339	0.149	false
01923:O15	1923	O15	NINDS2	NINDS	1502060	Snap (s-nitroso-n-acetylpenicillamine)	10 mM	274	306	39.416	41.176	13.057	0	12.31	0.495	0.171	false
01923:O17	1923	O17	NINDS2	NINDS	1502113	Azaserine	10 mM	335	301	37.313	43.854	13.57	0	9.7	0.247	0.135	false
01923:O19	1923	O19	NINDS2	NINDS	1500672	Quercetin	10 mM	294	295	31.293	39.322	6.13	0	0.495	-0.627	0.007	false
01923:O21	1923	O21	NINDS2	NINDS	1505035	Enoxaparin sodium (1% wt/vol in 10%aqueous dmso)	10 mM	236	305	34.322	34.426	4.632	4.713	0	-0.674	0	false
02043:A01	2043	A01	Gray1	Nathanael Gray Lab	AMY001-009		3.33 mM	313	314	24.92	7.643	7.233	7.913	0	-0.674	0	false
02043:A02	2043	A02	Gray1	Nathanael Gray Lab	KIN001-119		3.33 mM	357	389	19.048	5.913	1.839	0	0	-0.674	0	false
02043:A03	2043	A03	Gray1	Nathanael Gray Lab	REN-A-77-1		3.33 mM	123	193	70.732	45.078	66.135	54.076	0	-0.674	0	false
02043:A04	2043	A04	Gray1	Nathanael Gray Lab	KIN001-128		3.33 mM	270	267	92.593	88.015	111.868	21.104	87.242	1.032	0.993	true
02043:A05	2043	A05	Gray1	Nathanael Gray Lab	CGP60474		3.33 mM	247	270	64.777	60	72.389	24.224	44.108	0.188	0.502	false
02043:A06	2043	A06	Gray1	Nathanael Gray Lab	KIN001-133		3.33 mM	339	311	16.519	10.289	3.117	6.496	0	-0.674	0	false
02043:A07	2043	A07	Gray1	Nathanael Gray Lab	SJKIII101B		3.33 mM	319	262	16.928	7.634	1.541	14.264	0	-0.674	0	false
02043:A08	2043	A08	Gray1	Nathanael Gray Lab	KIN001-139		3.33 mM	78	76	100	98.684	124.637	77.366	47.139	0.248	0.537	false
02043:A09	2043	A09	Gray1	Nathanael Gray Lab	XW-1-145-5		3.33 mM	283	320	12.721	11.25	1.09	11.69	0	-0.674	0	false
02043:A10	2043	A10	Gray1	Nathanael Gray Lab	KIN001-143		3.33 mM	329	360	38.298	17.778	23.873	0	3.566	-0.605	0.041	false
02043:A11	2043	A11	Gray1	Nathanael Gray Lab	AMY001-021		3.33 mM	152	207	59.211	38.647	53.419	47.655	0	-0.674	0	false
02043:A12	2043	A12	Gray1	Nathanael Gray Lab	KIN001-151		3.33 mM	129	154	79.845	48.701	75.165	58.608	0	-0.674	0	false
02043:A13	2043	A13	Gray1	Nathanael Gray Lab	YT151		3.33 mM	273	338	43.223	34.024	38.796	10.711	19.294	-0.297	0.22	false
02043:A14	2043	A14	Gray1	Nathanael Gray Lab	KIN001-152		3.33 mM	270	333	12.593	9.91	0.057	11.872	0	-0.674	0	false
02043:A15	2043	A15	Gray1	Nathanael Gray Lab	XW-I-57		3.33 mM	318	341	8.491	7.331	4.674	3.367	0.236	-0.67	0.003	false
02043:A16	2043	A16	Gray1	Nathanael Gray Lab	KIN001-153		3.33 mM	335	392	32.537	14.796	17.679	0	0.115	-0.672	0.001	false
02043:A17	2043	A17	Gray1	Nathanael Gray Lab	YT159		3.33 mM	303	352	31.353	25	24.009	4.136	13.82	-0.404	0.157	false
02043:A18	2043	A18	Gray1	Nathanael Gray Lab	KIN001-156		3.33 mM	279	279	15.412	9.677	1.899	18.041	0	-0.674	0	false
02043:A19	2043	A19	Gray1	Nathanael Gray Lab	YII-114		3.33 mM	357	395	18.487	13.671	6.894	0	2.241	-0.631	0.026	false
02043:A20	2043	A20	Gray1	Nathanael Gray Lab	KIN001-158		3.33 mM	321	321	10.903	7.165	3.074	5.703	0	-0.674	0	false
02043:A21	2043	A21	Gray1	Nathanael Gray Lab	NG-X-113		3.33 mM	281	398	12.456	10.05	0.058	6.761	0	-0.674	0	false
02043:A22	2043	A22	Gray1	Nathanael Gray Lab	KIN001-160		3.33 mM	223	388	44.395	39.691	43.613	15.686	23.7	-0.211	0.27	false
02043:B01	2043	B01	Gray1	Nathanael Gray Lab	KANG204D		3.33 mM	263	379	38.023	39.578	39.001	9.531	27.44	-0.138	0.312	false
02043:B03	2043	B03	Gray1	Nathanael Gray Lab	KANG-205a		3.33 mM	244	321	19.262	13.396	7.251	17.551	0	-0.674	0	false
02043:B05	2043	B05	Gray1	Nathanael Gray Lab	KANG-205c		3.33 mM	233	294	29.185	18.707	18.044	23.021	0	-0.674	0	false
02043:B07	2043	B07	Gray1	Nathanael Gray Lab	KANG-205d		3.33 mM	182	286	14.835	12.238	3.288	31.988	0	-0.674	0	false
02043:B09	2043	B09	Gray1	Nathanael Gray Lab	KANG-206a		3.33 mM	264	321	20.455	9.346	5.253	14.474	0	-0.674	0	false
02043:B11	2043	B11	Gray1	Nathanael Gray Lab	KANG-206d		3.33 mM	239	346	7.531	8.092	4.821	14.824	0	-0.674	0	false
02043:B13	2043	B13	Gray1	Nathanael Gray Lab	HG-1-90-01		3.33 mM	273	328	8.425	7.317	4.731	12.11	0	-0.674	0	false
02043:B15	2043	B15	Gray1	Nathanael Gray Lab	HG-1-92-01		3.33 mM	214	330	13.084	5.152	2.939	20.909	0	-0.674	0	false
02043:B17	2043	B17	Gray1	Nathanael Gray Lab	HG-2-100-01		3.33 mM	297	332	13.468	10.542	1.124	7.857	0	-0.674	0	false
02043:B19	2043	B19	Gray1	Nathanael Gray Lab	HG-3-39-01		3.33 mM	245	392	9.388	9.184	2.734	12.3	0	-0.674	0	false
02043:B21	2043	B21	Gray1	Nathanael Gray Lab	HG-7-26-01		3.33 mM	988	185	97.267	96.216	120.958	24.121	96.732	1.218	1.102	true
02043:C01	2043	C01	Gray1	Nathanael Gray Lab	YT93A		3.33 mM	238	346	33.193	27.746	27.248	14.978	7.156	-0.534	0.081	false
02043:C03	2043	C03	Gray1	Nathanael Gray Lab	REN-A-93		3.33 mM	226	344	57.08	54.942	63.357	17.104	44.775	0.201	0.51	false
02043:C05	2043	C05	Gray1	Nathanael Gray Lab	YT107		3.33 mM	214	343	15.888	9.913	2.403	19.09	0	-0.674	0	false
02043:C07	2043	C07	Gray1	Nathanael Gray Lab	YD48		3.33 mM	249	322	10.442	10.248	1.235	16.642	0	-0.674	0	false
02043:C09	2043	C09	Gray1	Nathanael Gray Lab	YT113B		3.33 mM	226	289	6.637	11.765	2.876	24.797	0	-0.674	0	false
02043:C11	2043	C11	Gray1	Nathanael Gray Lab	YT101		3.33 mM	168	278	11.905	10.072	0.319	35.261	0	-0.674	0	false
02043:C13	2043	C13	Gray1	Nathanael Gray Lab	YT103		3.33 mM	225	275	15.556	12	3.634	26.91	0	-0.674	0	false
02043:C15	2043	C15	Gray1	Nathanael Gray Lab	REN-A-79		3.33 mM	168	205	97.619	88.293	115.639	45.473	61.9	0.537	0.705	false
02043:C17	2043	C17	Gray1	Nathanael Gray Lab	YT137		3.33 mM	260	353	14.615	9.065	0.902	10.613	0	-0.674	0	false
02043:C19	2043	C19	Gray1	Nathanael Gray Lab	YT143		3.33 mM	228	327	7.456	10.092	3.469	19.174	0	-0.674	0	false
02043:C21	2043	C21	Gray1	Nathanael Gray Lab	YT119		3.33 mM	325	354	14.769	13.559	4.17	0.481	2.642	-0.623	0.03	false
02043:D01	2043	D01	Gray1	Nathanael Gray Lab	CVM-04-044		3.33 mM	238	310	21.008	18.71	12.229	20.013	0	-0.674	0	false
02043:D03	2043	D03	Gray1	Nathanael Gray Lab	CVM-04-060		3.33 mM	261	298	14.559	13.423	3.925	18.153	0	-0.674	0	false
02043:D05	2043	D05	Gray1	Nathanael Gray Lab	CVM-04-069-1		3.33 mM	236	220	13.136	14.091	3.382	32.911	0	-0.674	0	false
02043:D07	2043	D07	Gray1	Nathanael Gray Lab	CVM-04-069-2		3.33 mM	167	269	14.97	9.665	1.576	36.674	0	-0.674	0	false
02043:D09	2043	D09	Gray1	Nathanael Gray Lab	CVM-04-080		3.33 mM	236	311	15.254	10.289	2.217	20.181	0	-0.674	0	false
02043:D11	2043	D11	Gray1	Nathanael Gray Lab	CVM-04-124-1		3.33 mM	138	260	13.768	10	0.956	42.395	0	-0.674	0	false
02043:D13	2043	D13	Gray1	Nathanael Gray Lab	CVM-04-45		3.33 mM	197	215	18.782	14.884	7.956	39.611	0	-0.674	0	false
02043:D15	2043	D15	Gray1	Nathanael Gray Lab	CVM-04-93		3.33 mM	248	218	10.081	6.881	3.86	31.344	0	-0.674	0	false
02043:D17	2043	D17	Gray1	Nathanael Gray Lab	CVM-04-82		3.33 mM	283	284	81.625	80.634	98.878	16.726	82.128	0.932	0.935	true
02043:D19	2043	D19	Gray1	Nathanael Gray Lab	CVM-05-001		3.33 mM	246	279	10.569	9.677	1.546	23.119	0	-0.674	0	false
02043:D21	2043	D21	Gray1	Nathanael Gray Lab	CVM-05-84		3.33 mM	321	379	84.424	65.172	89.999	0.606	70.924	0.713	0.808	false
02043:E01	2043	E01	Gray1	Nathanael Gray Lab	ALW-I-16-4		3.33 mM	261	300	75.096	80	93.787	17.873	70.049	0.696	0.798	false
02043:E03	2043	E03	Gray1	Nathanael Gray Lab	ALW-I-17-14		3.33 mM	239	302	9.205	11.921	0.94	20.979	0	-0.674	0	false
02043:E05	2043	E05	Gray1	Nathanael Gray Lab	ALW-I-17-16		3.33 mM	191	305	8.901	9.836	2.622	27.945	0	-0.674	0	false
02043:E07	2043	E07	Gray1	Nathanael Gray Lab	ALW-I-17-20		3.33 mM	168	247	20.238	21.053	13.328	39.597	0	-0.674	0	false
02043:E09	2043	E09	Gray1	Nathanael Gray Lab	ALW-I-40-4		3.33 mM	310	351	34.194	23.647	25.079	3.199	11.617	-0.447	0.132	false
02043:E11	2043	E11	Gray1	Nathanael Gray Lab	ALW-I-40-8		3.33 mM	144	230	16.667	10	3.018	45.668	0	-0.674	0	false
02043:E13	2043	E13	Gray1	Nathanael Gray Lab	ALW-I-40-9		3.33 mM	226	278	59.735	45.683	58.738	26.336	18.899	-0.305	0.215	false
02043:E15	2043	E15	Gray1	Nathanael Gray Lab	ALW-I-40-11		3.33 mM	225	259	33.778	28.958	28.516	29.148	0	-0.674	0	false
02043:E17	2043	E17	Gray1	Nathanael Gray Lab	ALW-I-42-3		3.33 mM	193	322	25.907	8.385	8.456	25.259	0	-0.674	0	false
02043:E19	2043	E19	Gray1	Nathanael Gray Lab	ALW-I-43-1		3.33 mM	271	319	35.793	17.868	22.155	13.676	0	-0.674	0	false
02043:E21	2043	E21	Gray1	Nathanael Gray Lab	ALW-I-43-3		3.33 mM	186	328	10.215	9.146	2.171	25.497	0	-0.674	0	false
02043:F01	2043	F01	Gray1	Nathanael Gray Lab	CVM-04-115		3.33 mM	233	286	26.609	24.476	20.266	24.14	0	-0.674	0	false
02043:F03	2043	F03	Gray1	Nathanael Gray Lab	CVM-5-004		3.33 mM	232	319	15.948	15.674	6.495	19.678	0	-0.674	0	false
02043:F05	2043	F05	Gray1	Nathanael Gray Lab	CVM-04-70		3.33 mM	309	261	19.741	8.046	3.832	15.943	0	-0.674	0	false
02043:F07	2043	F07	Gray1	Nathanael Gray Lab	CVM-04-089		3.33 mM	179	291	13.408	16.838	5.507	31.75	0	-0.674	0	false
02043:F09	2043	F09	Gray1	Nathanael Gray Lab	CVM-05-056		3.33 mM	236	242	10.593	14.05	1.544	29.833	0	-0.674	0	false
02043:F11	2043	F11	Gray1	Nathanael Gray Lab	CVM-05-85		3.33 mM	277	230	14.079	11.304	2.094	25.203	0	-0.674	0	false
02043:F13	2043	F13	Gray1	Nathanael Gray Lab	CVM-04-124-3		3.33 mM	131	212	14.504	15.094	5.06	50.187	0	-0.674	0	false
02043:F15	2043	F15	Gray1	Nathanael Gray Lab	CVM-04-133-1		3.33 mM	181	246	10.497	21.951	7.03	37.737	0	-0.674	0	false
02043:F17	2043	F17	Gray1	Nathanael Gray Lab	CVM-5-31		3.33 mM	230	265	28.696	23.774	21.257	27.539	0	-0.674	0	false
02043:F19	2043	F19	Gray1	Nathanael Gray Lab	SJKIII101A		3.33 mM	293	297	13.993	9.764	0.951	13.369	0	-0.674	0	false
02043:F21	2043	F21	Gray1	Nathanael Gray Lab	QL-III-34		3.33 mM	212	241	99.528	99.17	124.643	33.666	90.144	1.089	1.027	true
02043:G01	2043	G01	Gray1	Nathanael Gray Lab	ALW-I-49-1		3.33 mM	232	305	21.121	19.016	12.524	21.636	0	-0.674	0	false
02043:G03	2043	G03	Gray1	Nathanael Gray Lab	ALW-I-62-16		3.33 mM	230	308	11.304	8.117	2.12	21.524	0	-0.674	0	false
02043:G05	2043	G05	Gray1	Nathanael Gray Lab	ALW-I-62-17		3.33 mM	183	308	10.929	6.494	3.528	28.756	0	-0.674	0	false
02043:G07	2043	G07	Gray1	Nathanael Gray Lab	ALW-I-62-20		3.33 mM	213	270	78.873	77.037	94.392	29.456	64.025	0.578	0.729	false
02043:G09	2043	G09	Gray1	Nathanael Gray Lab	ALW-I-62-22		3.33 mM	198	241	8.586	11.203	1.884	35.82	0	-0.674	0	false
02043:G11	2043	G11	Gray1	Nathanael Gray Lab	ALW-I-62-23		3.33 mM	164	207	7.317	14.01	0.814	45.808	0	-0.674	0	false
02043:G13	2043	G13	Gray1	Nathanael Gray Lab	ALW-I-62-24		3.33 mM	140	221	16.429	9.502	2.499	47.543	0	-0.674	0	false
02043:G15	2043	G15	Gray1	Nathanael Gray Lab	ALW-I-62-25		3.33 mM	257	268	16.732	14.925	6.526	22.965	0	-0.674	0	false
02043:G17	2043	G17	Gray1	Nathanael Gray Lab	ALW-I-62-26		3.33 mM	214	313	35.514	12.46	18.155	23.287	0	-0.674	0	false
02043:G19	2043	G19	Gray1	Nathanael Gray Lab	ALW-II-31-1		3.33 mM	235	353	11.489	8.782	1.521	14.46	0	-0.674	0	false
02043:G21	2043	G21	Gray1	Nathanael Gray Lab	ALW-II-31-2		3.33 mM	267	306	9.738	12.745	0.019	16.11	0	-0.674	0	false
02043:H01	2043	H01	Gray1	Nathanael Gray Lab	ALW-II-41-27		3.33 mM	253	263	100	98.099	124.225	24.28	99.222	1.267	1.13	true
02043:H03	2043	H03	Gray1	Nathanael Gray Lab	XMD7-1		3.33 mM	284	362	44.366	44.199	46.762	6.299	40.099	0.11	0.457	false
02043:H05	2043	H05	Gray1	Nathanael Gray Lab	XMD7-2		3.33 mM	295	307	60.339	60.912	69.872	11.662	56.906	0.439	0.648	false
02043:H07	2043	H07	Gray1	Nathanael Gray Lab	XMD7-27		3.33 mM	249	287	48.193	55.749	57.603	21.538	27.839	-0.13	0.317	false
02043:H09	2043	H09	Gray1	Nathanael Gray Lab	XMD7-113		3.33 mM	322	336	24.845	16.964	13.731	3.451	2.603	-0.624	0.03	false
02043:H11	2043	H11	Gray1	Nathanael Gray Lab	XMD3-123		3.33 mM	178	243	10.112	14.403	1.451	38.618	0	-0.674	0	false
02043:H13	2043	H13	Gray1	Nathanael Gray Lab	XMD3-146		3.33 mM	214	254	42.991	43.307	45.156	31.54	12.78	-0.424	0.146	false
02043:H15	2043	H15	Gray1	Nathanael Gray Lab	XMD3-150		3.33 mM	238	260	31.933	29.615	27.666	27.008	0	-0.674	0	false
02043:H17	2043	H17	Gray1	Nathanael Gray Lab	XMD11-85a		3.33 mM	235	309	73.191	83.819	95.117	20.615	62.868	0.555	0.716	false
02043:H19	2043	H19	Gray1	Nathanael Gray Lab	XMD11-85b		3.33 mM	290	317	94.138	89.905	114.296	11.033	100.11	1.284	1.14	true
02043:H21	2043	H21	Gray1	Nathanael Gray Lab	XMD11-85c		3.33 mM	238	295	80.672	77.966	96.324	22.112	72.443	0.743	0.825	false
02043:I01	2043	I01	Gray1	Nathanael Gray Lab	ALW-II-36-1		3.33 mM	193	204	87.047	87.745	107.733	41.766	64.215	0.582	0.731	false
02043:I03	2043	I03	Gray1	Nathanael Gray Lab	ALW-II-36-2		3.33 mM	62	45	98.387	100	124.414	84.165	37.436	0.058	0.426	false
02043:I05	2043	I05	Gray1	Nathanael Gray Lab	ALW-II-36-3		3.33 mM	174	228	52.874	46.491	54.425	41.332	7.269	-0.532	0.083	false
02043:I07	2043	I07	Gray1	Nathanael Gray Lab	ALW-II-37-1		3.33 mM	175	235	88.571	83.83	106.065	40.199	62.131	0.541	0.708	false
02043:I09	2043	I09	Gray1	Nathanael Gray Lab	ALW-II-37-2		3.33 mM	91	78	100	100	125.562	75.086	49.275	0.29	0.561	false
02043:I11	2043	I11	Gray1	Nathanael Gray Lab	ALW-II-37-3		3.33 mM	157	206	80.892	71.845	92.178	47.025	36.968	0.049	0.421	false
02043:I13	2043	I13	Gray1	Nathanael Gray Lab	ALW-II-38-1		3.33 mM	199	224	13.065	9.821	0.331	38.045	0	-0.674	0	false
02043:I15	2043	I15	Gray1	Nathanael Gray Lab	ALW-II-38-2		3.33 mM	249	260	10.442	13.846	1.293	25.315	0	-0.674	0	false
02043:I17	2043	I17	Gray1	Nathanael Gray Lab	ALW-II-41-1		3.33 mM	249	294	18.474	20.408	11.62	20.559	0	-0.674	0	false
02043:I19	2043	I19	Gray1	Nathanael Gray Lab	ALW-II-41-4		3.33 mM	221	291	93.213	94.502	116.869	25.287	89.158	1.07	1.015	true
02043:I21	2043	I21	Gray1	Nathanael Gray Lab	ALW-II-41-10		3.33 mM	277	323	17.329	29.102	16.916	12.194	0	-0.674	0	false
02043:J01	2043	J01	Gray1	Nathanael Gray Lab	XMD11-85d		3.33 mM	295	303	27.458	24.092	20.6	12.222	5.303	-0.571	0.06	false
02043:J03	2043	J03	Gray1	Nathanael Gray Lab	XMD11-85e		3.33 mM	185	306	63.243	66.34	75.754	28.728	43.132	0.169	0.491	false
02043:J05	2043	J05	Gray1	Nathanael Gray Lab	XMD11-85f		3.33 mM	246	256	82.927	82.813	101.335	26.336	74.119	0.776	0.844	false
02043:J07	2043	J07	Gray1	Nathanael Gray Lab	XMD11-85g		3.33 mM	183	201	79.781	79.104	96.491	43.724	52.494	0.353	0.598	false
02043:J09	2043	J09	Gray1	Nathanael Gray Lab	XMD11-85h		3.33 mM	246	281	76.829	85.409	98.823	22.839	66.378	0.624	0.756	false
02043:J11	2043	J11	Gray1	Nathanael Gray Lab	WZ3026		3.33 mM	150	248	16.667	11.694	4.209	42.227	0	-0.674	0	false
02043:J13	2043	J13	Gray1	Nathanael Gray Lab	WZ3102		3.33 mM	103	127	58.252	59.843	67.636	66.385	0	-0.674	0	false
02043:J15	2043	J15	Gray1	Nathanael Gray Lab	WZ3105		3.33 mM	128	154	82.031	74.026	94.522	58.762	28.643	-0.114	0.326	false
02043:J17	2043	J17	Gray1	Nathanael Gray Lab	WZ4016		3.33 mM	270	282	59.63	72.34	77.401	19.006	44.816	0.202	0.51	false
02043:J19	2043	J19	Gray1	Nathanael Gray Lab	WZ4066		3.33 mM	283	330	27.562	38.182	30.578	10.291	9.209	-0.494	0.105	false
02043:J21	2043	J21	Gray1	Nathanael Gray Lab	WZ4094		3.33 mM	214	220	48.131	41.818	47.766	36.296	5.66	-0.564	0.064	false
02043:K01	2043	K01	Gray1	Nathanael Gray Lab	ALW-II-41-13		3.33 mM	187	137	100	99.27	125.049	52.061	72.526	0.744	0.826	false
02043:K03	2043	K03	Gray1	Nathanael Gray Lab	ALW-II-41-14		3.33 mM	87	37	95.402	97.297	120.391	81.437	35.891	0.028	0.409	false
02043:K05	2043	K05	Gray1	Nathanael Gray Lab	ALW-II-41-16		3.33 mM	159	218	64.151	70.642	79.424	45.039	27.045	-0.145	0.308	false
02043:K07	2043	K07	Gray1	Nathanael Gray Lab	ALW-II-41-17		3.33 mM	129	230	31.008	20.435	20.555	47.977	0	-0.674	0	false
02043:K09	2043	K09	Gray1	Nathanael Gray Lab	ALW-II-41-19		3.33 mM	212	244	16.981	13.525	5.719	33.247	0	-0.674	0	false
02043:K11	2043	K11	Gray1	Nathanael Gray Lab	ALW-II-41-20		3.33 mM	137	158	56.934	41.139	53.552	56.817	0	-0.674	0	false
02043:K13	2043	K13	Gray1	Nathanael Gray Lab	ALW-II-41-21		3.33 mM	121	188	57.851	59.574	67.162	55.083	9.641	-0.486	0.11	false
02043:K15	2043	K15	Gray1	Nathanael Gray Lab	ALW-II-46-4		3.33 mM	130	181	99.231	100	125.014	54.677	68.368	0.663	0.779	false
02043:K17	2043	K17	Gray1	Nathanael Gray Lab	ALW-II-46-5		3.33 mM	170	178	100	99.438	125.167	48.942	75.593	0.804	0.861	true
02043:K19	2043	K19	Gray1	Nathanael Gray Lab	ALW-II-46-7		3.33 mM	229	301	69.432	69.767	82.566	22.657	58.736	0.475	0.669	false
02043:K21	2043	K21	Gray1	Nathanael Gray Lab	ALW-II-46-8		3.33 mM	266	309	71.429	73.139	86.356	15.845	67.922	0.654	0.773	false
02043:L01	2043	L01	Gray1	Nathanael Gray Lab	WZ4099		3.33 mM	240	342	13.75	19.883	7.89	15.229	0	-0.674	0	false
02043:L03	2043	L03	Gray1	Nathanael Gray Lab	WZ4103		3.33 mM	172	242	47.674	48.347	52.031	39.681	11.097	-0.457	0.126	false
02043:L05	2043	L05	Gray1	Nathanael Gray Lab	WZ4105		3.33 mM	174	280	24.138	36.071	26.659	34.058	0	-0.674	0	false
02043:L07	2043	L07	Gray1	Nathanael Gray Lab	WZ4118		3.33 mM	249	284	41.365	25.704	31.627	21.958	0	-0.674	0	false
02043:L09	2043	L09	Gray1	Nathanael Gray Lab	WZ4140		3.33 mM	155	265	10.323	5.283	4.811	39.08	0	-0.674	0	false
02043:L11	2043	L11	Gray1	Nathanael Gray Lab	WZ4141		3.33 mM	132	197	13.636	11.675	2.04	52.131	0	-0.674	0	false
02043:L13	2043	L13	Gray1	Nathanael Gray Lab	WZ5084		3.33 mM	161	249	8.696	19.679	4.151	40.395	0	-0.674	0	false
02043:L15	2043	L15	Gray1	Nathanael Gray Lab	WZ6044		3.33 mM	189	224	11.64	8.929	1.311	39.583	0	-0.674	0	false
02043:L17	2043	L17	Gray1	Nathanael Gray Lab	WZ6076		3.33 mM	209	249	29.665	43.373	35.724	33.009	0	-0.674	0	false
02043:L19	2043	L19	Gray1	Nathanael Gray Lab	WZ6083		3.33 mM	143	240	13.287	14.583	3.835	44.423	0	-0.674	0	false
02043:L21	2043	L21	Gray1	Nathanael Gray Lab	WZ6108		3.33 mM	228	292	31.14	27.055	25.302	24.07	0	-0.674	0	false
02043:M01	2043	M01	Gray1	Nathanael Gray Lab	ALW-II-46-9		3.33 mM	32	39	96.875	100	123.339	89.62	29.393	-0.099	0.335	false
02043:M03	2043	M03	Gray1	Nathanael Gray Lab	ALW-II-46-10		3.33 mM	209	308	13.876	4.87	2.573	24.756	0	-0.674	0	false
02043:M05	2043	M05	Gray1	Nathanael Gray Lab	ALW-II-46-11		3.33 mM	148	128	97.973	99.219	123.571	59.321	61.812	0.535	0.704	false
02043:M07	2043	M07	Gray1	Nathanael Gray Lab	ALW-II-46-19		3.33 mM	198	291	11.111	13.746	1.699	28.826	0	-0.674	0	false
02043:M09	2043	M09	Gray1	Nathanael Gray Lab	ALW-II-46-26		3.33 mM	50	28	96	89.286	115.185	88.389	21.153	-0.261	0.241	false
02043:M11	2043	M11	Gray1	Nathanael Gray Lab	ALW-II-46-27		3.33 mM	146	172	100	98.837	124.744	53.474	71.247	0.719	0.811	false
02043:M13	2043	M13	Gray1	Nathanael Gray Lab	ALW-II-49-2		3.33 mM	174	295	20.69	12.542	7.667	31.96	0	-0.674	0	false
02043:M15	2043	M15	Gray1	Nathanael Gray Lab	ALW-II-49-8		3.33 mM	181	298	11.602	8.389	1.717	30.463	0	-0.674	0	false
02043:M17	2043	M17	Gray1	Nathanael Gray Lab	ALW-II-49-10d		3.33 mM	284	296	18.31	13.514	6.657	14.893	0	-0.674	0	false
02043:M19	2043	M19	Gray1	Nathanael Gray Lab	ALW-II-50-1		3.33 mM	199	273	36.181	33.333	33.301	31.19	0	-0.674	0	false
02043:M21	2043	M21	Gray1	Nathanael Gray Lab	ALW-II-57-1		3.33 mM	166	189	41.566	44.974	45.315	48.018	0	-0.674	0	false
02043:N01	2043	N01	Gray1	Nathanael Gray Lab	WZ6148		3.33 mM	252	280	47.222	47.857	51.365	22.056	28.1	-0.125	0.32	false
02043:N03	2043	N03	Gray1	Nathanael Gray Lab	HG-7-27-01		3.33 mM	676	375	94.675	93.867	117.462	0	117.143	1.617	1.334	true
02043:N05	2043	N05	Gray1	Nathanael Gray Lab	KIN001-005		3.33 mM	204	281	67.157	51.246	67.928	29.302	23.33	-0.218	0.266	false
02043:N07	2043	N07	Gray1	Nathanael Gray Lab	KIN001-006		3.33 mM	181	247	29.834	34.818	29.83	37.597	0	-0.674	0	false
02043:N09	2043	N09	Gray1	Nathanael Gray Lab	KIN001-009		3.33 mM	150	232	34	26.724	27.104	44.465	0	-0.674	0	false
02043:N11	2043	N11	Gray1	Nathanael Gray Lab	KIN001-010		3.33 mM	174	241	15.517	8.299	1.005	39.513	0	-0.674	0	false
02043:N13	2043	N13	Gray1	Nathanael Gray Lab	KIN001-011		3.33 mM	142	289	11.268	5.536	3.96	37.723	0	-0.674	0	false
02043:N15	2043	N15	Gray1	Nathanael Gray Lab	KIN001-012		3.33 mM	256	320	10.156	8.75	2.492	15.845	0	-0.674	0	false
02043:N17	2043	N17	Gray1	Nathanael Gray Lab	KIN001-013		3.33 mM	129	285	17.054	16.14	7.61	40.283	0	-0.674	0	false
02043:N19	2043	N19	Gray1	Nathanael Gray Lab	KIN001-021		3.33 mM	221	261	95.475	89.272	114.802	29.484	80.187	0.894	0.913	true
02043:N21	2043	N21	Gray1	Nathanael Gray Lab	KIN001-024		3.33 mM	170	263	9.412	9.886	2.223	37.051	0	-0.674	0	false
02043:O01	2043	O01	Gray1	Nathanael Gray Lab	ALW-II-57-2		3.33 mM	220	310	17.273	11.613	4.583	22.783	0	-0.674	0	false
02043:O03	2043	O03	Gray1	Nathanael Gray Lab	KANG201A		3.33 mM	160	246	21.875	13.008	8.838	40.968	0	-0.674	0	false
02043:O05	2043	O05	Gray1	Nathanael Gray Lab	KANG-201c		3.33 mM	148	266	15.541	11.654	3.38	40.017	0	-0.674	0	false
02043:O07	2043	O07	Gray1	Nathanael Gray Lab	KANG-201d		3.33 mM	153	250	12.418	2.8	5.065	41.486	0	-0.674	0	false
02043:O09	2043	O09	Gray1	Nathanael Gray Lab	KANG202A		3.33 mM	145	216	33.793	25	25.745	47.473	0	-0.674	0	false
02043:O11	2043	O11	Gray1	Nathanael Gray Lab	KANG-202c		3.33 mM	137	277	10.949	7.581	2.75	40.171	0	-0.674	0	false
02043:O13	2043	O13	Gray1	Nathanael Gray Lab	KANG-202d		3.33 mM	113	218	8.85	6.422	5.058	52.117	0	-0.674	0	false
02043:O15	2043	O15	Gray1	Nathanael Gray Lab	KANG-203a		3.33 mM	154	264	27.273	13.636	13.119	39.374	0	-0.674	0	false
02043:O17	2043	O17	Gray1	Nathanael Gray Lab	KANG-203c		3.33 mM	86	260	43.023	20.769	29.337	50.397	0	-0.674	0	false
02043:O19	2043	O19	Gray1	Nathanael Gray Lab	KANG-203d		3.33 mM	175	209	6.286	4.785	8.033	43.836	0	-0.674	0	false
02043:O21	2043	O21	Gray1	Nathanael Gray Lab	KANG-204a		3.33 mM	118	249	26.271	28.916	23.147	47.011	0	-0.674	0	false
02043:P01	2043	P01	Gray1	Nathanael Gray Lab	KIN001-032		3.33 mM	321	311	11.215	11.897	0.473	7.102	0	-0.674	0	false
02043:P03	2043	P03	Gray1	Nathanael Gray Lab	KIN001-033		3.33 mM	230	250	11.304	8.4	1.921	29.637	0	-0.674	0	false
02043:P05	2043	P05	Gray1	Nathanael Gray Lab	KIN001-038		3.33 mM	99	164	50.505	46.341	52.635	61.825	0	-0.674	0	false
02043:P07	2043	P07	Gray1	Nathanael Gray Lab	KIN001-041		3.33 mM	223	259	9.417	7.722	3.74	29.456	0	-0.674	0	false
02043:P09	2043	P09	Gray1	Nathanael Gray Lab	KIN001-046		3.33 mM	237	262	16.878	12.595	4.993	26.882	0	-0.674	0	false
02043:P11	2043	P11	Gray1	Nathanael Gray Lab	KIN001-047		3.33 mM	221	235	10.86	16.596	3.524	33.121	0	-0.674	0	false
02043:P13	2043	P13	Gray1	Nathanael Gray Lab	KIN001-052		3.33 mM	207	227	11.594	23.348	8.792	36.394	0	-0.674	0	false
02043:P15	2043	P15	Gray1	Nathanael Gray Lab	KIN001-057		3.33 mM	142	182	38.028	31.868	33.586	52.691	0	-0.674	0	false
02043:P17	2043	P17	Gray1	Nathanael Gray Lab	KIN001-063		3.33 mM	238	281	8.403	14.591	0.367	24.07	0	-0.674	0	false
02043:P19	2043	P19	Gray1	Nathanael Gray Lab	KIN001-064		3.33 mM	223	237	6.278	6.751	6.656	32.533	0	-0.674	0	false
02043:P21	2043	P21	Gray1	Nathanael Gray Lab	KIN001-074		3.33 mM	271	231	6.642	40.693	17.462	25.986	0	-0.674	0	false
02089:A03	2089	A03	Biomol4	BIOMOL	DL-552	Moroxydine HCl	9.6 mM	310	347	5.806	9.51	1.257	0.101	0	-0.674	-0.006	false
02089:A04	2089	A04	Biomol4	BIOMOL	AC-554	Mianserin hcl	7.6 mM	310	302	32.903	28.146	31.05	0.101	25.894	2.604	0.348	false
02089:A05	2089	A05	Biomol4	BIOMOL	A-190	Clindamycin HCl	4.7 mM	277	304	6.137	8.553	1.705	5.412	0	-0.674	-0.006	false
02089:A06	2089	A06	Biomol4	BIOMOL	AC-615	Aminophylline	11.1 mM	302	301	4.305	9.635	2.225	1.419	0	-0.674	-0.006	false
02089:A07	2089	A07	Biomol4	BIOMOL	A-192	Clindamycin PO4	3 mM	277	331	4.332	9.366	2.397	5.412	0	-0.674	-0.006	false
02089:A08	2089	A08	Biomol4	BIOMOL	AC-626	Furafylline	7.7 mM	261	320	6.13	11.563	0.43	7.988	0	-0.674	-0.006	false
02089:A09	2089	A09	Biomol4	BIOMOL	A-195	Cyclosporin a	1.7 mM	246	382	6.911	8.901	0.914	10.402	0	-0.674	-0.006	false
02089:A10	2089	A10	Biomol4	BIOMOL	DL-561	nateglinide	6.3 mM	304	308	5.592	9.74	1.244	1.066	0	-0.674	-0.006	false
02089:A11	2089	A11	Biomol4	BIOMOL	A-239	Kasugamycin	5.3 mM	327	307	6.422	9.121	1.101	0	0	-0.674	-0.006	false
02089:A12	2089	A12	Biomol4	BIOMOL	AC-729	Isoproterenol HCl (rac)	9.5 mM	220	289	8.182	8.997	0.049	16.611	0	-0.674	-0.006	false
02089:A13	2089	A13	Biomol4	BIOMOL	A-240	Lincomycin	4.9 mM	261	261	6.897	12.261	1.465	14.659	0	-0.674	-0.006	false
02089:A14	2089	A14	Biomol4	BIOMOL	AC-734	Acetylcholine Cl	13.7 mM	271	287	4.428	5.923	4.776	8.734	0	-0.674	-0.006	false
02089:A15	2089	A15	Biomol4	BIOMOL	A245	Lomofungin	6.4 mM	270	320	10.741	19.375	9.227	6.539	0	-0.674	-0.006	false
02089:A16	2089	A16	Biomol4	BIOMOL	AC-735	Atropine sulfate	6.9 mM	315	320	6.349	7.188	2.526	0	1.764	-0.451	0.018	false
02089:A17	2089	A17	Biomol4	BIOMOL	A-249	Mycophenolic acid	6.2 mM	284	319	4.225	5.956	4.896	4.286	0	-0.674	-0.006	false
02089:A18	2089	A18	Biomol4	BIOMOL	AC-737	Decamethonium 2Br	7.7 mM	272	347	2.206	6.916	5.633	6.217	0	-0.674	-0.006	false
02089:A19	2089	A19	Biomol4	BIOMOL	A-256	Novobiocin Na	3.3 mM	264	324	3.409	8.642	3.56	7.505	0	-0.674	-0.006	false
02089:A20	2089	A20	Biomol4	BIOMOL	AC-741	Mecamylamine HCl	12 mM	312	339	15.705	5.31	2.72	0	0	-0.674	-0.006	false
02089:A21	2089	A21	Biomol4	BIOMOL	A-275	Rapamycin	2.2 mM	310	352	3.548	3.977	6.778	0.101	6.291	0.122	0.08	false
02089:A22	2089	A22	Biomol4	BIOMOL	AC-743	Neostigmine Br	9 mM	325	354	8.615	3.672	3.431	0	0	-0.674	-0.006	false
02089:B03	2089	B03	Biomol4	BIOMOL	AR-103	Tizanidine HCl	7.9 mM	355	348	5.634	5.172	4.462	0	3.946	-0.175	0.048	false
02089:B04	2089	B04	Biomol4	BIOMOL	EI-217	Tranylcypromine	15 mM	304	356	11.184	9.831	2.754	1.066	0.231	-0.645	-0.003	false
02089:B05	2089	B05	Biomol4	BIOMOL	DL-549	Meglumine	10.2 mM	350	342	7.714	7.895	1.063	0	0.966	-0.552	0.007	false
02089:B06	2089	B06	Biomol4	BIOMOL	EI-219	Piroxicam	6 mM	289	305	10.035	5.246	1.314	3.481	0	-0.674	-0.006	false
02089:B07	2089	B07	Biomol4	BIOMOL	AR-107	Propranolol HCl s(-)	7.7 mM	291	312	38.144	47.756	48.678	3.159	36.412	3.936	0.492	false
02089:B08	2089	B08	Biomol4	BIOMOL	EI-240	Deprenyl HCl r (-)	10.7 mM	284	308	10.563	8.766	1.56	4.286	0	-0.674	-0.006	false
02089:B09	2089	B09	Biomol4	BIOMOL	AR-112	Carvedilol	4.9 mM	265	329	30.566	36.17	35.111	7.344	22.545	2.18	0.302	false
02089:B10	2089	B10	Biomol4	BIOMOL	EI-249	Troleandomycin	2.5 mM	312	366	7.372	6.284	2.449	0	1.295	-0.511	0.011	false
02089:B11	2089	B11	Biomol4	BIOMOL	DL-223	Cerivastatin	4.4 mM	280	305	27.5	45.574	39.639	4.93	17.118	1.493	0.228	false
02089:B12	2089	B12	Biomol4	BIOMOL	EI-265	Carbidopa	8.8 mM	296	298	5.743	5.369	4.245	2.883	0.931	-0.557	0.006	false
02089:B13	2089	B13	Biomol4	BIOMOL	AW8655	Aclarubicin	2.5 mM	182	203	30.769	28.571	29.852	37.004	0	-0.674	-0.006	false
02089:B14	2089	B14	Biomol4	BIOMOL	EI-287	Nimesulide	6.5 mM	277	320	10.108	6.875	0.104	5.412	0	-0.674	-0.006	false
02089:B15	2089	B15	Biomol4	BIOMOL	B-100	Flumazenil	6.6 mM	292	359	7.192	6.128	2.687	2.998	0	-0.674	-0.006	false
02089:B16	2089	B16	Biomol4	BIOMOL	EI-288	Ketoprofen	7.9 mM	293	343	9.898	7.872	0.456	2.837	0	-0.674	-0.006	false
02089:B17	2089	B17	Biomol4	BIOMOL	GR-103	Fenretinide	5.1 mM	281	353	6.762	4.816	3.922	4.769	0	-0.674	-0.006	false
02089:B18	2089	B18	Biomol4	BIOMOL	EI-292	Meloxicam	5.7 mM	297	326	10.101	4.908	1.508	2.193	0	-0.674	-0.006	false
02089:B19	2089	B19	Biomol4	BIOMOL	DL-269	Gefitinib	4.5 mM	297	261	43.434	28.352	38.605	8.865	14.358	1.143	0.19	false
02089:B20	2089	B20	Biomol4	BIOMOL	EI-318	Terbinafine HCl	6.9 mM	300	331	14.667	6.647	2.939	1.71	0	-0.674	-0.006	false
02089:B21	2089	B21	Biomol4	BIOMOL	DL-270	Ibudilast	8.7 mM	278	305	7.554	10.82	0.903	5.252	0	-0.674	-0.006	false
02089:B22	2089	B22	Biomol4	BIOMOL	EI320	Sodium phenylbutyrate	10.7 mM	316	411	5.063	5.596	4.562	0	4.088	-0.157	0.049	false
02089:C03	2089	C03	Biomol4	BIOMOL	A-280	Spectinomycin	6 mM	321	357	5.607	9.524	1.387	0	0	-0.674	-0.006	false
02089:C04	2089	C04	Biomol4	BIOMOL	AC-745	Strychnine HCl	6 mM	343	328	14.869	11.89	6.809	0	3.705	-0.205	0.044	false
02089:C05	2089	C05	Biomol4	BIOMOL	AC-104	Bepridil	5.5 mM	355	301	42.817	32.226	40.924	0.031	29.961	3.119	0.403	false
02089:C06	2089	C06	Biomol4	BIOMOL	AC-746	Tubocurarine Cl (+)	3.3 mM	327	315	6.422	8.889	1.266	0	0	-0.674	-0.006	false
02089:C07	2089	C07	Biomol4	BIOMOL	AC-105	Amiodarone	3.1 mM	302	321	36.093	33.333	36.982	1.388	32.481	3.438	0.438	false
02089:C08	2089	C08	Biomol4	BIOMOL	AC-747	Butaclamol (+)	5.5 mM	318	372	14.78	18.817	11.671	0	7.833	0.317	0.101	false
02089:C09	2089	C09	Biomol4	BIOMOL	AC-108	Nicardipine	4.2 mM	268	402	12.687	11.94	5.31	6.861	0	-0.674	-0.006	false
02089:C10	2089	C10	Biomol4	BIOMOL	AC-748	Apomorphine r (-)	7.5 mM	266	346	9.023	8.96	0.614	7.183	0	-0.674	-0.006	false
02089:C11	2089	C11	Biomol4	BIOMOL	AC-109	Pimozide	4.3 mM	282	319	36.879	29.467	34.786	4.608	22.455	2.168	0.301	false
02089:C12	2089	C12	Biomol4	BIOMOL	AC-749	Chlorpromazine HCl	6.3 mM	269	272	53.532	46.324	58.482	11.546	39.239	4.293	0.53	false
02089:C13	2089	C13	Biomol4	BIOMOL	AC-110	Loperamide	4.2 mM	287	267	33.101	38.577	38.605	9.478	24.059	2.372	0.323	false
02089:C14	2089	C14	Biomol4	BIOMOL	AC-751	Domperidone	4.7 mM	267	313	25.094	21.725	20.993	7.022	10.373	0.639	0.135	false
02089:C15	2089	C15	Biomol4	BIOMOL	AC-116	Fluspirilene	4.2 mM	305	358	38.361	34.358	39.305	0.905	34.033	3.634	0.459	false
02089:C16	2089	C16	Biomol4	BIOMOL	AC-753	Fluphenazine 2HCl	4.6 mM	282	328	53.901	57.622	66.774	4.608	59.055	6.802	0.801	false
02089:C17	2089	C17	Biomol4	BIOMOL	AC-117	Tolbutamide	7.4 mM	287	318	10.105	8.176	0.818	3.803	0	-0.674	-0.006	false
02089:C18	2089	C18	Biomol4	BIOMOL	AC-755	Pergolide mesylate	6.4 mM	252	346	29.762	28.035	28.762	9.437	17.301	1.516	0.23	false
02089:C19	2089	C19	Biomol4	BIOMOL	AC-118	Pinacidil	8.2 mM	288	352	7.639	8.239	0.872	3.642	0	-0.674	-0.006	false
02089:C20	2089	C20	Biomol4	BIOMOL	AC-757	Raclopride l-tartrate s(-)	5.8 mM	319	314	9.404	7.006	0.506	0	0	-0.674	-0.006	false
02089:C21	2089	C21	Biomol4	BIOMOL	AC-120	Glipizide	4.5 mM	308	334	7.143	8.982	0.692	0.423	0	-0.674	-0.006	false
02089:C22	2089	C22	Biomol4	BIOMOL	AC-758	Risperidone	4.9 mM	386	362	12.953	10.773	4.668	0	2.374	-0.374	0.026	false
02089:D03	2089	D03	Biomol4	BIOMOL	DL-271	Imatinib	4.1 mM	355	360	30.704	31.667	32.007	0	31.379	3.298	0.423	false
02089:D04	2089	D04	Biomol4	BIOMOL	FR-111	Ergothioneine	8.7 mM	335	325	8.358	10.154	0.996	0	0	-0.674	-0.006	false
02089:D05	2089	D05	Biomol4	BIOMOL	DL-548	Idarubicin	4 mM	1	2	100	100	129.326	99.507	28.761	2.967	0.387	false
02089:D06	2089	D06	Biomol4	BIOMOL	FR-112	Ambroxol	5.3 mM	312	325	18.269	21.538	16.06	0	13.019	0.974	0.172	false
02089:D07	2089	D07	Biomol4	BIOMOL	DL-273	Montelukast	3.4 mM	278	289	10.432	13.841	5.075	7.275	0	-0.674	-0.006	false
02089:D08	2089	D08	Biomol4	BIOMOL	FR114	Idebenone	5.9 mM	318	320	7.233	7.813	1.461	0	0.963	-0.553	0.007	false
02089:D09	2089	D09	Biomol4	BIOMOL	EI-240	Selegiline	10.7 mM	318	324	7.233	9.877	0.007	0	0	-0.674	-0.006	false
02089:D10	2089	D10	Biomol4	BIOMOL	G-233	Mevastatin	5.1 mM	296	354	18.919	39.548	29.32	2.354	6.755	0.181	0.086	false
02089:D11	2089	D11	Biomol4	BIOMOL	DL-275	Vatalanib	5.8 mM	286	313	7.343	7.029	1.94	3.964	0	-0.674	-0.006	false
02089:D12	2089	D12	Biomol4	BIOMOL	G-244	Simvastatin	4.8 mM	272	310	28.309	25.161	25.697	6.217	16.066	1.36	0.213	false
02089:D13	2089	D13	Biomol4	BIOMOL	CT-100	Fumagillone	4.4 mM	268	263	8.209	13.308	3.133	13.201	0	-0.674	-0.006	false
02089:D14	2089	D14	Biomol4	BIOMOL	G-430	Suramin sodium	1.5 mM	284	306	2.465	2.288	8.742	4.286	4.255	-0.136	0.052	false
02089:D15	2089	D15	Biomol4	BIOMOL	DL-239	Efaroxan	9.2 mM	286	334	12.937	14.97	7.64	3.964	1.802	-0.446	0.018	false
02089:D16	2089	D16	Biomol4	BIOMOL	DL-282	Goserelin acetate	1.6 mM	284	341	5.986	9.677	1.012	4.286	0	-0.674	-0.006	false
02089:D17	2089	D17	Biomol4	BIOMOL	PG-007	Dinoprostone	5.7 mM	332	326	8.434	10.123	1.027	0	0	-0.674	-0.006	false
02089:D18	2089	D18	Biomol4	BIOMOL	DL-283	Guaiacol	16.1 mM	286	311	4.545	11.576	0.676	3.964	0	-0.674	-0.006	false
02089:D19	2089	D19	Biomol4	BIOMOL	DL-276	Metformin	15.5 mM	267	334	5.993	8.982	1.501	7.022	0	-0.674	-0.006	false
02089:D20	2089	D20	Biomol4	BIOMOL	GR-100	Retinoic acid	6.7 mM	312	334	6.41	8.084	1.846	0	0.258	-0.642	-0.003	false
02089:D21	2089	D21	Biomol4	BIOMOL	DL-277	Anagrelide	7.8 mM	297	335	18.182	17.91	13.419	2.193	10.765	0.689	0.141	false
02089:D22	2089	D22	Biomol4	BIOMOL	GR-210	Troglitazone	4.5 mM	346	383	6.358	5.222	3.917	0	2.725	-0.329	0.031	false
02089:E03	2089	E03	Biomol4	BIOMOL	AC-121	PhentolamineHCl	7.1 mM	374	338	10.963	10.355	2.97	0	2.253	-0.389	0.024	false
02089:E04	2089	E04	Biomol4	BIOMOL	AC-760	Sulpiride s (-)	5.9 mM	295	316	6.102	8.228	1.961	2.515	0	-0.674	-0.006	false
02089:E05	2089	E05	Biomol4	BIOMOL	AC-122	Quinine	6.2 mM	301	315	21.927	20.952	18.216	1.549	15.471	1.284	0.205	false
02089:E06	2089	E06	Biomol4	BIOMOL	AC-763	Diphenhydramine HCl	7.8 mM	288	297	22.917	28.956	24.602	4.337	14.532	1.165	0.192	false
02089:E07	2089	E07	Biomol4	BIOMOL	AC-123	Flufenamic acid	7.1 mM	329	310	8.207	7.419	1.055	0	0.189	-0.651	-0.004	false
02089:E08	2089	E08	Biomol4	BIOMOL	AC-765	Promethazine HCl	7 mM	266	304	51.128	46.711	57.067	7.183	44.972	5.019	0.609	false
02089:E09	2089	E09	Biomol4	BIOMOL	AC-124	Propafenone	5.9 mM	300	291	43	41.237	47.459	3.401	41.858	4.625	0.566	false
02089:E10	2089	E10	Biomol4	BIOMOL	AC-766	Ranitidine HCl	6.4 mM	308	323	7.792	7.43	1.339	0.423	0.476	-0.614	0	false
02089:E11	2089	E11	Biomol4	BIOMOL	AC-125	Phenytoin	7.9 mM	297	294	4.377	6.803	4.187	3.386	0	-0.674	-0.006	false
02089:E12	2089	E12	Biomol4	BIOMOL	AC-770	Naltrindole HCl	4.8 mM	254	283	48.031	34.276	46.049	12.134	19.797	1.832	0.264	false
02089:E13	2089	E13	Biomol4	BIOMOL	AC-127	Procainamide	8.5 mM	292	281	6.164	8.541	1.694	6.349	0	-0.674	-0.006	false
02089:E14	2089	E14	Biomol4	BIOMOL	AC-806	Idazoxan	9.8 mM	282	322	9.22	8.385	0.344	4.608	0	-0.674	-0.006	false
02089:E15	2089	E15	Biomol4	BIOMOL	AC-128	Lidocaine	8.5 mM	257	308	10.117	9.091	1.477	8.632	0	-0.674	-0.006	false
02089:E16	2089	E16	Biomol4	BIOMOL	AC-807	Spiperone	5.1 mM	277	346	33.213	33.526	35.093	5.412	29.639	3.078	0.399	false
02089:E17	2089	E17	Biomol4	BIOMOL	AC-130	Flecainide	4.8 mM	278	315	13.309	20	11.478	5.252	0	-0.674	-0.006	false
02089:E18	2089	E18	Biomol4	BIOMOL	AC-808	Epinephrine-(+)-tartrate l (-)	11.8 mM	329	331	12.158	7.553	1.819	0	0	-0.674	-0.006	false
02089:E19	2089	E19	Biomol4	BIOMOL	AC-131	Phenamil	6.5 mM	361	384	63.712	40.365	61.407	0	37.633	4.09	0.508	false
02089:E20	2089	E20	Biomol4	BIOMOL	AC-809	Xylazine HCl	9.1 mM	304	315	9.868	8.254	0.707	1.066	0	-0.674	-0.006	false
02089:E21	2089	E21	Biomol4	BIOMOL	AC-136	Cirazoline HCl	9.2 mM	311	317	10.289	13.249	4.554	0	1.735	-0.455	0.017	false
02089:E22	2089	E22	Biomol4	BIOMOL	AC-810	Norepinephrine-(+)-tartrate l (-)	6.3 mM	321	341	5.607	7.331	2.946	0	1.299	-0.51	0.011	false
02089:F03	2089	F03	Biomol4	BIOMOL	DL-278	Dofetilide	4.5 mM	356	334	6.742	13.772	2.431	0	0	-0.674	-0.006	false
02089:F04	2089	F04	Biomol4	BIOMOL	GR-211	Bezafibrate	5.5 mM	325	326	9.846	11.656	3.11	0	1.423	-0.494	0.013	false
02089:F05	2089	F05	Biomol4	BIOMOL	DL-279	Erlotinib	5.1 mM	318	293	6.604	10.922	0.307	1.359	0	-0.674	-0.006	false
02089:F06	2089	F06	Biomol4	BIOMOL	GR243	Raloxifene HCl	4.2 mM	299	295	31.438	34.915	34.832	2.898	28.826	2.975	0.388	false
02089:F07	2089	F07	Biomol4	BIOMOL	AC-227	Lobeline	5.9 mM	286	277	11.189	13.718	5.521	7.979	0	-0.674	-0.006	false
02089:F08	2089	F08	Biomol4	BIOMOL	GR-301	Camptothecin	5.7 mM	253	248	7.51	13.71	2.927	18.105	0	-0.674	-0.006	false
02089:F09	2089	F09	Biomol4	BIOMOL	NS-520	Melatonin	8.6 mM	283	324	4.947	12.963	0.593	4.447	0	-0.674	-0.006	false
02089:F10	2089	F10	Biomol4	BIOMOL	GR-305	Plicamycin	1.8 mM	203	224	16.256	18.75	12.662	30.138	0	-0.674	-0.006	false
02089:F11	2089	F11	Biomol4	BIOMOL	PG-008	Dinoprost	5.6 mM	304	315	12.5	15.556	7.749	1.066	3.791	-0.194	0.045	false
02089:F12	2089	F12	Biomol4	BIOMOL	GR-306	Rifampicin	2.4 mM	296	248	5.068	9.677	1.658	11.184	0	-0.674	-0.006	false
02089:F13	2089	F13	Biomol4	BIOMOL	EI-233	Fasudil	6.9 mM	298	280	6.04	8.929	1.506	5.55	0	-0.674	-0.006	false
02089:F14	2089	F14	Biomol4	BIOMOL	GR-307	Etoposide	3.4 mM	249	269	10.04	10.781	2.624	15.263	0	-0.674	-0.006	false
02089:F15	2089	F15	Biomol4	BIOMOL	C-106	Hydroxytacrine maleate	9.3 mM	256	305	5.859	8.197	2.153	8.793	0	-0.674	-0.006	false
02089:F16	2089	F16	Biomol4	BIOMOL	GR-311	Mitomycin c	6 mM	248	228	17.339	18.421	13.189	22.23	0	-0.674	-0.006	false
02089:F17	2089	F17	Biomol4	BIOMOL	C-109	Oxotremorine sesquifumarate	9.7 mM	329	292	8.511	10.274	1.188	1.525	0	-0.674	-0.006	false
02089:F18	2089	F18	Biomol4	BIOMOL	GR-312	Puromycin 2HCl	4.2 mM	63	76	93.651	93.421	120.183	77.242	41.722	4.608	0.564	false
02089:F19	2089	F19	Biomol4	BIOMOL	C-110	Tacrine HCl	10.1 mM	289	295	12.457	12.542	5.576	4.508	1.021	-0.545	0.008	false
02089:F20	2089	F20	Biomol4	BIOMOL	GR-314	Delavirdine mesylate	4.4 mM	320	310	8.438	9.355	0.483	0	0	-0.674	-0.006	false
02089:F21	2089	F21	Biomol4	BIOMOL	C-112	Gallamine triethiodide	3.9 mM	287	386	3.484	4.922	6.152	3.803	0.963	-0.553	0.007	false
02089:F22	2089	F22	Biomol4	BIOMOL	GR-316	10-hydroxycamptothecin	5.5 mM	259	308	10.811	8.117	1.273	8.31	0	-0.674	-0.006	false
02089:G03	2089	G03	Biomol4	BIOMOL	AC-138	Oxymetazoline HCl	7.7 mM	357	394	17.367	22.589	16.172	0	11.189	0.742	0.147	false
02089:G04	2089	G04	Biomol4	BIOMOL	DL-557	Quetiapine fumarate	2.3 mM	335	318	24.179	29.245	25.696	0	20.939	1.977	0.28	false
02089:G05	2089	G05	Biomol4	BIOMOL	AC-142	Ifenprodil	6.1 mM	315	317	21.587	28.391	23.265	0	16.762	1.448	0.223	false
02089:G06	2089	G06	Biomol4	BIOMOL	AC-812	Alprenolol HCl	8 mM	260	240	34.615	32.917	35.646	18.307	15.293	1.262	0.203	false
02089:G07	2089	G07	Biomol4	BIOMOL	AC-144	Naftopidil 2HCl	5.1 mM	276	322	11.232	11.18	3.746	5.573	0	-0.674	-0.006	false
02089:G08	2089	G08	Biomol4	BIOMOL	AC-813	Imipramine HCl	7.1 mM	277	251	51.264	50.996	60.209	13.744	45.658	5.106	0.618	false
02089:G09	2089	G09	Biomol4	BIOMOL	AC-146	Prazosin HCl	5.2 mM	273	257	57.509	67.315	76.203	13.392	53.717	6.127	0.728	false
02089:G10	2089	G10	Biomol4	BIOMOL	AC-814	Amoxapine	6.4 mM	313	258	61.342	71.705	82.02	7.17	65.245	7.586	0.886	true
02089:G11	2089	G11	Biomol4	BIOMOL	AC-152	Clonidine HCl	8.7 mM	320	313	10.938	10.863	3.314	0	3.124	-0.279	0.036	false
02089:G12	2089	G12	Biomol4	BIOMOL	AC-834	Mesulergine HCl	5.5 mM	311	274	22.186	17.518	15.957	4.513	6.59	0.16	0.084	false
02089:G13	2089	G13	Biomol4	BIOMOL	AC-153	Guanabenz acetate	8.7 mM	274	281	31.752	28.114	30.218	9.247	17.036	1.482	0.227	false
02089:G14	2089	G14	Biomol4	BIOMOL	DL-558	Amfebutamone	8.3 mM	300	285	10.333	8.772	1.402	4.398	0	-0.674	-0.006	false
02089:G15	2089	G15	Biomol4	BIOMOL	AC-154	Rilmenidine hemifumarate	11.1 mM	281	326	10.32	10.736	2.79	4.769	0	-0.674	-0.006	false
02089:G16	2089	G16	Biomol4	BIOMOL	AC-840	Metoclopramide HCl	6.7 mM	292	362	6.507	10.773	0.134	2.998	0	-0.674	-0.006	false
02089:G17	2089	G17	Biomol4	BIOMOL	AC-160	Spiroxatrine	5.3 mM	339	312	9.145	15.064	5.039	0	0	-0.674	-0.006	false
02089:G18	2089	G18	Biomol4	BIOMOL	AC-858	Naltriben mesylate	4.8 mM	337	314	29.97	29.936	30.26	0	29.91	3.112	0.403	false
02089:G19	2089	G19	Biomol4	BIOMOL	AC-161	Yohimbine HCl	5.6 mM	327	370	11.315	11.351	3.927	0	3.843	-0.188	0.046	false
02089:G20	2089	G20	Biomol4	BIOMOL	DL-124	Vitamin a (acetate)	6.1 mM	347	354	8.357	7.627	0.801	0	0	-0.674	-0.006	false
02089:G21	2089	G21	Biomol4	BIOMOL	AC-164	Dihydroergotamine mesylate	3.4 mM	328	325	17.378	20.308	14.558	0	11.843	0.825	0.156	false
02089:G22	2089	G22	Biomol4	BIOMOL	AC-891	Levallorphan tartrate	7.1 mM	352	381	17.898	24.409	17.84	0	11.586	0.792	0.152	false
02089:H03	2089	H03	Biomol4	BIOMOL	C-115	Galanthamine HBr	7 mM	367	371	6.54	11.59	0.737	0	0	-0.674	-0.006	false
02089:H04	2089	H04	Biomol4	BIOMOL	GR-318	Daunorubicin HCl	3.8 mM	7	5	100	80	115.108	98.043	0	-0.674	-0.006	false
02089:H05	2089	H05	Biomol4	BIOMOL	CA-200	Amiloride	8.7 mM	352	290	7.67	6.207	2.294	1.857	0	-0.674	-0.006	false
02089:H06	2089	H06	Biomol4	BIOMOL	GR-319	Doxorubicin HCl	3.7 mM	4	1	100	0	58.236	99.19	0	-0.674	-0.006	false
02089:H07	2089	H07	Biomol4	BIOMOL	CA-202	Amlodipine	4.9 mM	331	269	10.876	7.807	1.098	5.343	0	-0.674	-0.006	false
02089:H08	2089	H08	Biomol4	BIOMOL	GR336	Tanshinone iia	6.8 mM	251	259	39.044	34.749	40.064	16.601	18.8	1.706	0.251	false
02089:H09	2089	H09	Biomol4	BIOMOL	CA-205	Diltiazem	4.8 mM	324	317	25.309	23.659	22.519	0	20.619	1.936	0.276	false
02089:H10	2089	H10	Biomol4	BIOMOL	DL-284	Lapatinib	3.4 mM	621	585	95.169	93.675	121.431	0	118.947	14.385	1.62	true
02089:H11	2089	H11	Biomol4	BIOMOL	CA-210	Nifedipine	5.8 mM	308	321	8.442	14.019	3.802	0.423	0	-0.674	-0.006	false
02089:H12	2089	H12	Biomol4	BIOMOL	DL-285	Methyl salicylate	13.1 mM	330	289	10.303	11.419	3.263	2.023	0.245	-0.644	-0.003	false
02089:H13	2089	H13	Biomol4	BIOMOL	CA-211	Nimodipine	4.8 mM	282	283	10.993	12.367	4.422	7.627	0	-0.674	-0.006	false
02089:H14	2089	H14	Biomol4	BIOMOL	GR-240	Pioglitazone	5.6 mM	286	282	6.294	10.638	0.112	7.149	0	-0.674	-0.006	false
02089:H15	2089	H15	Biomol4	BIOMOL	CA-212	Nitrendipine	5.5 mM	292	331	11.301	9.668	2.72	2.998	0	-0.674	-0.006	false
02089:H16	2089	H16	Biomol4	BIOMOL	DL-287	Pranlukast	4.2 mM	311	351	8.039	7.977	0.777	0	0.631	-0.595	0.002	false
02089:H17	2089	H17	Biomol4	BIOMOL	CA-215	Verapamil	4.4 mM	291	313	32.646	33.866	34.936	3.159	30.915	3.24	0.416	false
02089:H18	2089	H18	Biomol4	BIOMOL	DL-288	Rivastigmine	8 mM	329	295	8.511	10.169	1.114	1.027	0	-0.674	-0.006	false
02089:H19	2089	H19	Biomol4	BIOMOL	CA-216	Niguldipine HCl	3.3 mM	315	319	36.508	24.765	31.182	0	19.177	1.754	0.256	false
02089:H20	2089	H20	Biomol4	BIOMOL	DL-289	Rofecoxib	6.4 mM	297	314	8.754	9.554	0.848	2.193	0	-0.674	-0.006	false
02089:H21	2089	H21	Biomol4	BIOMOL	CA-225	Flunarizine-2HCl	4.9 mM	314	353	18.79	20.397	15.614	0	14.223	1.126	0.188	false
02089:H22	2089	H22	Biomol4	BIOMOL	DL-236	Ergotamine D-tartrate	3.4 mM	290	382	9.655	7.33	0.1	3.32	0	-0.674	-0.006	false
02089:I03	2089	I03	Biomol4	BIOMOL	AC-165	Nicergoline	4.1 mM	322	365	13.354	18.356	10.34	0	5.533	0.026	0.069	false
02089:I04	2089	I04	Biomol4	BIOMOL	AC-893	Nalbuphine HCl	5.6 mM	335	342	11.642	7.018	1.076	0	0	-0.674	-0.006	false
02089:I05	2089	I05	Biomol4	BIOMOL	DL-564	Emtricitabine	8.1 mM	302	295	7.947	8.814	0.246	2.416	0	-0.674	-0.006	false
02089:I06	2089	I06	Biomol4	BIOMOL	AC-911	Carbamylcholine Cl	13.6 mM	304	304	9.868	9.539	1.621	1.066	0.125	-0.659	-0.005	false
02089:I07	2089	I07	Biomol4	BIOMOL	AC-169	Betaxolol HCl	6.5 mM	249	239	25.301	25.105	23.541	20.243	2.836	-0.315	0.032	false
02089:I08	2089	I08	Biomol4	BIOMOL	AC-912	Carbamyl-beta-methylcholine Cl	12.4 mM	277	322	11.191	10.559	3.276	5.412	0	-0.674	-0.006	false
02089:I09	2089	I09	Biomol4	BIOMOL	AC-171	Practolol	7.5 mM	310	328	5.806	9.756	1.082	0.101	0	-0.674	-0.006	false
02089:I10	2089	I10	Biomol4	BIOMOL	AC-915	Butyrylcholine Cl	11.5 mM	290	310	12.069	8.065	2.12	3.32	0	-0.674	-0.006	false
02089:I11	2089	I11	Biomol4	BIOMOL	AC-172	Timolol maleate (s)	6.3 mM	314	264	7.643	14.015	3.238	6.173	0	-0.674	-0.006	false
02089:I12	2089	I12	Biomol4	BIOMOL	AC-925	Famotidine	5.9 mM	291	319	12.371	8.777	2.84	3.159	0	-0.674	-0.006	false
02089:I13	2089	I13	Biomol4	BIOMOL	AC-173	Xamoterol hemifumarate	5.9 mM	271	288	7.011	12.5	1.716	8.568	0	-0.674	-0.006	false
02089:I14	2089	I14	Biomol4	BIOMOL	AC-928	Terfenadine	4.2 mM	270	270	31.111	29.259	30.581	11.717	16.703	1.44	0.222	false
02089:I15	2089	I15	Biomol4	BIOMOL	AC-174	Clenbuterol	7.2 mM	315	318	13.016	17.925	9.796	0	5.077	-0.032	0.063	false
02089:I16	2089	I16	Biomol4	BIOMOL	AC-986	Isoniazid	14.6 mM	310	326	8.387	8.589	0.097	0.101	0	-0.674	-0.006	false
02089:I17	2089	I17	Biomol4	BIOMOL	AC-175	Procaterol hcl	6.9 mM	335	351	8.657	13.96	3.911	0	0	-0.674	-0.006	false
02089:I18	2089	I18	Biomol4	BIOMOL	AC-993	Ticlopidine HCl	7.6 mM	318	281	13.208	12.456	6.043	3.351	1.808	-0.446	0.018	false
02089:I19	2089	I19	Biomol4	BIOMOL	AC-176	Salbutamol sulfate	8.4 mM	301	312	6.645	6.731	2.643	1.549	1.079	-0.538	0.008	false
02089:I20	2089	I20	Biomol4	BIOMOL	DL-246	Amorolfine	6.3 mM	308	352	34.091	12.5	20.763	0.423	0	-0.674	-0.006	false
02089:I21	2089	I21	Biomol4	BIOMOL	AC-181	Pindolol	8.1 mM	302	368	7.285	8.696	0.796	1.388	0	-0.674	-0.006	false
02089:I22	2089	I22	Biomol4	BIOMOL	DL-247	Clemastine fumarate	5.8 mM	327	352	55.046	59.091	68.624	0	65.204	7.581	0.885	true
02089:J03	2089	J03	Biomol4	BIOMOL	CA-234	Gabapentin	11.7 mM	336	355	7.44	6.197	2.463	0	1.154	-0.528	0.009	false
02089:J04	2089	J04	Biomol4	BIOMOL	DL-291	Sulindac	5.6 mM	358	373	8.38	6.166	1.824	0	0	-0.674	-0.006	false
02089:J05	2089	J05	Biomol4	BIOMOL	CA-236	Felodipine	5.2 mM	320	293	11.563	13.311	5.493	1.359	2.527	-0.355	0.028	false
02089:J06	2089	J06	Biomol4	BIOMOL	DL-292	Valproic acid	13.9 mM	300	284	6	8.803	1.624	4.564	0	-0.674	-0.006	false
02089:J07	2089	J07	Biomol4	BIOMOL	CA-237	Cilnidipine	4.1 mM	311	289	14.148	10.381	5.229	2.023	0	-0.674	-0.006	false
02089:J08	2089	J08	Biomol4	BIOMOL	DL-547	Calcipotriene	4.8 mM	309	283	10.032	8.481	0.984	3.281	0	-0.674	-0.006	false
02089:J09	2089	J09	Biomol4	BIOMOL	CA-305	Phenoxybenzamine HCl	6.6 mM	320	319	14.375	10.972	5.809	0	2.29	-0.385	0.025	false
02089:J10	2089	J10	Biomol4	BIOMOL	DL-294	Zafirlukast	3.5 mM	319	278	9.718	9.712	1.638	3.849	0	-0.674	-0.006	false
02089:J11	2089	J11	Biomol4	BIOMOL	CA-310	Trifluoperazine	4.9 mM	306	274	35.621	39.781	41.233	5.258	32.236	3.407	0.434	false
02089:J12	2089	J12	Biomol4	BIOMOL	DL-295	Zileuton	8.5 mM	282	270	7.447	7.778	1.335	9.785	0	-0.674	-0.006	false
02089:J13	2089	J13	Biomol4	BIOMOL	DL-218	Denbufylline	6.2 mM	298	272	7.383	6.985	1.943	6.878	0	-0.674	-0.006	false
02089:J14	2089	J14	Biomol4	BIOMOL	PR-118	Pentamidine	5.9 mM	244	279	13.525	12.903	6.584	14.408	0	-0.674	-0.006	false
02089:J15	2089	J15	Biomol4	BIOMOL	DL-131	Miltefosine	4.9 mM	301	272	9.967	10.294	2.227	6.395	0	-0.674	-0.006	false
02089:J16	2089	J16	Biomol4	BIOMOL	DL-297	Bortezomib	5.2 mM	180	192	79.444	88.542	106.722	39.152	59.409	6.847	0.806	false
02089:J17	2089	J17	Biomol4	BIOMOL	DL-281	Latanoprost	4.6 mM	311	257	8.039	9.339	0.191	7.336	0	-0.674	-0.006	false
02089:J18	2089	J18	Biomol4	BIOMOL	DL-161	Bambuterol	5.4 mM	319	313	13.166	13.419	6.698	0	6.588	0.16	0.084	false
02089:J19	2089	J19	Biomol4	BIOMOL	CM-109	Ouabain	3.4 mM	309	302	80.259	79.139	100.61	0.262	98.392	11.783	1.339	true
02089:J20	2089	J20	Biomol4	BIOMOL	DL-186	Fentiazac	6.1 mM	354	302	9.605	11.921	3.128	0	0.938	-0.556	0.006	false
02089:J21	2089	J21	Biomol4	BIOMOL	CM-112	Clopamide	5.8 mM	312	300	6.09	11.667	0.475	0.197	0	-0.674	-0.006	false
02089:J22	2089	J22	Biomol4	BIOMOL	J120	Mephenytoin	9.2 mM	324	323	8.025	15.789	4.767	0	0	-0.674	-0.006	false
02089:K03	2089	K03	Biomol4	BIOMOL	AC-183	Cimaterol	9.1 mM	349	339	8.596	12.979	3.171	0	0	-0.674	-0.006	false
02089:K04	2089	K04	Biomol4	BIOMOL	DL-248	Vardenafil	4.1 mM	361	341	15.235	10.557	6.12	0	1.33	-0.506	0.012	false
02089:K05	2089	K05	Biomol4	BIOMOL	AC-185	Dobutamine HCl	6.6 mM	339	327	7.67	4.893	3.229	0	0.4	-0.624	-0.001	false
02089:K06	2089	K06	Biomol4	BIOMOL	DL-249	Linezolid	5.9 mM	305	293	4.918	8.191	2.819	2.265	0	-0.674	-0.006	false
02089:K07	2089	K07	Biomol4	BIOMOL	AC-189	Pronethalol HCl	8.7 mM	297	279	26.599	37.634	33.362	5.876	16.848	1.459	0.224	false
02089:K08	2089	K08	Biomol4	BIOMOL	DL-250	Docetaxil	2.5 mM	236	222	13.983	5.405	1.576	25.158	0	-0.674	-0.006	false
02089:K09	2089	K09	Biomol4	BIOMOL	AC-192	Sotalol HCl	7.3 mM	347	294	11.816	8.163	2.012	1.193	0	-0.674	-0.006	false
02089:K10	2089	K10	Biomol4	BIOMOL	DL-251	Olopatadine	5.9 mM	330	277	7.879	10.469	0.883	4.015	0	-0.674	-0.006	false
02089:K11	2089	K11	Biomol4	BIOMOL	AR-111	Maprotiline HCl	7.2 mM	305	267	80.328	77.528	99.513	6.581	89.313	10.633	1.215	true
02089:K12	2089	K12	Biomol4	BIOMOL	DL-258	Manidipine	3.3 mM	288	263	20.139	12.167	10.713	9.981	0	-0.674	-0.006	false
02089:K13	2089	K13	Biomol4	BIOMOL	AC-194	Nisoxetine HCl	7.4 mM	265	249	26.792	22.088	22.446	16.008	1.501	-0.485	0.014	false
02089:K14	2089	K14	Biomol4	BIOMOL	DL-252	Tolcapone	7.3 mM	282	262	9.929	13.359	4.379	11.113	0	-0.674	-0.006	false
02089:K15	2089	K15	Biomol4	BIOMOL	DL-553	Canthaxanthin	3.5 mM	334	289	87.425	77.509	104.492	2.023	91.732	10.94	1.248	true
02089:K16	2089	K16	Biomol4	BIOMOL	DL-253	Gestrinone	6.5 mM	326	283	18.098	15.901	11.932	3.019	6.547	0.154	0.083	false
02089:K17	2089	K17	Biomol4	BIOMOL	AC-214	Pilocarpine HCl	9.6 mM	306	294	9.15	11.224	2.314	1.938	0	-0.674	-0.006	false
02089:K18	2089	K18	Biomol4	BIOMOL	DL-254	Olmesartan	3.6 mM	311	299	15.113	12.04	7.087	0.363	3.524	-0.228	0.042	false
02089:K19	2089	K19	Biomol4	BIOMOL	AC-218	Ipratropium Br	6 mM	317	315	10.41	7.619	0.637	0	0	-0.674	-0.006	false
02089:K20	2089	K20	Biomol4	BIOMOL	DL-255	Nisoldipine	5.1 mM	296	270	6.419	9.259	1.004	7.532	0	-0.674	-0.006	false
02089:K21	2089	K21	Biomol4	BIOMOL	AC-220	Pirenzepine 2HCl	5.7 mM	323	359	6.811	10.864	0.412	0	0	-0.674	-0.006	false
02089:K22	2089	K22	Biomol4	BIOMOL	DL-256	Lacidipine	4.4 mM	344	345	30.523	30.725	31.21	0	31.086	3.261	0.419	false
02089:L03	2089	L03	Biomol4	BIOMOL	CN-244	Molsidomine	8.3 mM	334	317	13.174	9.148	3.668	0	0	-0.674	-0.006	false
02089:L04	2089	L04	Biomol4	BIOMOL	KC-115	Diazoxide	8.7 mM	354	327	7.91	13.15	2.81	0	0	-0.674	-0.006	false
02089:L05	2089	L05	Biomol4	BIOMOL	CR110	Pravadoline	5.3 mM	291	261	9.278	14.559	4.775	9.83	0	-0.674	-0.006	false
02089:L06	2089	L06	Biomol4	BIOMOL	KC-120	Glyburide	4 mM	341	290	5.865	7.241	2.829	1.857	0	-0.674	-0.006	false
02089:L07	2089	L07	Biomol4	BIOMOL	CT110	Tranilast	6.1 mM	340	271	7.941	8.856	0.22	5.011	0	-0.674	-0.006	false
02089:L08	2089	L08	Biomol4	BIOMOL	KC-125	Minoxidil	9.6 mM	319	263	16.301	11.407	7.473	6.339	0	-0.674	-0.006	false
02089:L09	2089	L09	Biomol4	BIOMOL	CT115	Shikonin	6.9 mM	175	190	83.429	69.474	95.969	40.289	40.99	4.515	0.554	false
02089:L10	2089	L10	Biomol4	BIOMOL	KC-135	Tolazamide	6.4 mM	313	286	11.182	7.692	1.232	2.521	0	-0.674	-0.006	false
02089:L11	2089	L11	Biomol4	BIOMOL	D-102	Bromocriptine mesylate	3.1 mM	313	251	8.307	9.562	0.538	8.332	0	-0.674	-0.006	false
02089:L12	2089	L12	Biomol4	BIOMOL	KC-152	Nicorandil	9.5 mM	302	265	10.265	9.434	1.825	7.396	0	-0.674	-0.006	false
02089:L13	2089	L13	Biomol4	BIOMOL	D-107	Clozapine	6.1 mM	271	239	42.804	43.933	49.238	16.702	31.872	3.361	0.429	false
02089:L14	2089	L14	Biomol4	BIOMOL	DL-298	Bexarotene	5.7 mM	289	276	11.419	9.058	2.369	7.662	0	-0.674	-0.006	false
02089:L15	2089	L15	Biomol4	BIOMOL	D-108	Clothiapine	5.8 mM	302	291	40.397	34.021	40.498	3.08	30.682	3.21	0.413	false
02089:L16	2089	L16	Biomol4	BIOMOL	DL-221	Bromebric acid	7 mM	330	282	12.424	4.965	0.166	3.185	0	-0.674	-0.006	false
02089:L17	2089	L17	Biomol4	BIOMOL	D-109	Quinpirole HCl (-)-	9.1 mM	321	282	13.396	8.865	3.623	3.185	0	-0.674	-0.006	false
02089:L18	2089	L18	Biomol4	BIOMOL	DL-299	Celecoxib	5.2 mM	373	277	34.316	32.491	35.133	4.015	28.949	2.991	0.389	false
02089:L19	2089	L19	Biomol4	BIOMOL	D-111	Remoxipride	5.4 mM	316	314	12.975	9.873	4.043	0	0.836	-0.569	0.005	false
02089:L20	2089	L20	Biomol4	BIOMOL	DL-172	Levetiracetam	11.8 mM	325	329	11.077	8.511	1.74	0	0	-0.674	-0.006	false
02089:L21	2089	L21	Biomol4	BIOMOL	DM100	Calcifediol	5 mM	357	323	5.882	5.263	4.223	0	3.548	-0.225	0.042	false
02089:L22	2089	L22	Biomol4	BIOMOL	DL-300	Letrozole	7 mM	339	327	8.555	17.737	6.525	0	0	-0.674	-0.006	false
02089:M03	2089	M03	Biomol4	BIOMOL	AC-221	Telenzepine 2HCl	5.4 mM	353	329	10.198	9.422	1.77	0	0.894	-0.561	0.006	false
02089:M04	2089	M04	Biomol4	BIOMOL	DL-257	Olanzapine	6.4 mM	313	327	27.796	26.911	26.58	0	25.411	2.543	0.341	false
02089:M05	2089	M05	Biomol4	BIOMOL	AC-222	Tropicamide	7 mM	320	313	8.438	10.224	1.101	0	0	-0.674	-0.006	false
02089:M06	2089	M06	Biomol4	BIOMOL	G-226	Lovastatin	4.9 mM	381	242	26.772	20.661	21.417	9.826	5.262	-0.008	0.066	false
02089:M07	2089	M07	Biomol4	BIOMOL	AC-232	Pancuronium Br	3.5 mM	301	273	12.957	7.692	2.48	6.229	0	-0.674	-0.006	false
02089:M08	2089	M08	Biomol4	BIOMOL	NA-137	Lamotrigine	7.8 mM	334	227	9.581	13.656	4.345	12.316	0	-0.674	-0.006	false
02089:M09	2089	M09	Biomol4	BIOMOL	AC-238	Ivermectin	2.3 mM	298	287	10.738	9.756	2.387	4.387	0	-0.674	-0.006	false
02089:M10	2089	M10	Biomol4	BIOMOL	DL-260	Ractopamine	6.6 mM	307	263	10.749	6.464	0.054	6.923	0	-0.674	-0.006	false
02089:M11	2089	M11	Biomol4	BIOMOL	AC-241	Physostigmine sulfate	7.3 mM	303	245	11.881	10.612	3.799	10.555	0	-0.674	-0.006	false
02089:M12	2089	M12	Biomol4	BIOMOL	DL-261	Sildenafil	4.2 mM	267	261	10.112	9.195	1.548	13.694	0	-0.674	-0.006	false
02089:M13	2089	M13	Biomol4	BIOMOL	DL-554	Nialamide	6.7 mM	292	258	7.534	8.14	1.016	10.168	0	-0.674	-0.006	false
02089:M14	2089	M14	Biomol4	BIOMOL	DL-262	Atovaquone	5.5 mM	308	274	6.494	4.015	4.68	4.936	0	-0.674	-0.006	false
02089:M15	2089	M15	Biomol4	BIOMOL	AC-250	Haloperidol HCl	5.3 mM	349	279	45.272	35.484	44.967	3.683	31.12	3.266	0.419	false
02089:M16	2089	M16	Biomol4	BIOMOL	DL-208	Sertaconazole	4.6 mM	357	301	24.65	5.316	9.015	0.031	0	-0.674	-0.006	false
02089:M17	2089	M17	Biomol4	BIOMOL	AC-259	Piribedil HCl	6.7 mM	374	271	12.032	12.915	5.543	5.011	0	-0.674	-0.006	false
02089:M18	2089	M18	Biomol4	BIOMOL	DL-191	Cefepime	4.2 mM	334	268	15.569	10.448	6.276	5.509	0	-0.674	-0.006	false
02089:M19	2089	M19	Biomol4	BIOMOL	AC-277	Mepyramine maleate	7 mM	329	274	13.07	18.978	10.583	4.513	0.362	-0.629	-0.001	false
02089:M20	2089	M20	Biomol4	BIOMOL	DL-178	Aripiprazole	4.5 mM	337	292	24.036	33.904	28.907	1.525	17.872	1.588	0.238	false
02089:M21	2089	M21	Biomol4	BIOMOL	AC-279	Trans-triprolidine HCl	7.2 mM	322	302	19.876	12.252	10.588	0	2.834	-0.316	0.032	false
02089:M22	2089	M22	Biomol4	BIOMOL	DL-264	Candesartan	4.5 mM	367	350	4.905	11.143	0.731	0	0	-0.674	-0.006	false
02089:N03	2089	N03	Biomol4	BIOMOL	DM200	Calcitriol	4.8 mM	379	304	6.86	4.934	3.769	0	1.791	-0.448	0.018	false
02089:N04	2089	N04	Biomol4	BIOMOL	DL-301	Abamectin	2.3 mM	360	338	4.722	6.509	4.153	0	2.435	-0.366	0.027	false
02089:N05	2089	N05	Biomol4	BIOMOL	EI-107	Ketoconazole	3.8 mM	354	308	7.627	11.364	1.341	0	0	-0.674	-0.006	false
02089:N06	2089	N06	Biomol4	BIOMOL	DL-222	Alfacalcidol	5 mM	361	278	4.432	6.475	4.381	3.849	0	-0.674	-0.006	false
02089:N07	2089	N07	Biomol4	BIOMOL	EI-114	Oxatomide	4.7 mM	364	269	22.527	22.677	19.864	5.343	14.43	1.152	0.191	false
02089:N08	2089	N08	Biomol4	BIOMOL	DL-151	Anethole-trithione (anetholtrithion)	8.3 mM	374	284	8.824	8.099	0.138	2.853	0	-0.674	-0.006	false
02089:N09	2089	N09	Biomol4	BIOMOL	EI-121	Disodium cromoglycate	3.9 mM	333	316	8.408	8.544	0.113	0	0.068	-0.666	-0.005	false
02089:N10	2089	N10	Biomol4	BIOMOL	DL-144	Anastrozole	6.8 mM	311	299	8.039	6.355	1.93	0.363	0	-0.674	-0.006	false
02089:N11	2089	N11	Biomol4	BIOMOL	EI-125	Capsaicin	6.5 mM	311	266	9.646	14.662	5.106	5.841	0	-0.674	-0.006	false
02089:N12	2089	N12	Biomol4	BIOMOL	DL-162	Bicalutamide	4.6 mM	277	276	7.942	7.971	0.849	9.594	0	-0.674	-0.006	false
02089:N13	2089	N13	Biomol4	BIOMOL	EI-126	Dexamethasone	5.1 mM	301	253	5.316	3.162	6.115	9.549	0	-0.674	-0.006	false
02089:N14	2089	N14	Biomol4	BIOMOL	DL-180	Clodronate disodium	8.2 mM	317	265	7.571	5.66	2.753	6.007	0	-0.674	-0.006	false
02089:N15	2089	N15	Biomol4	BIOMOL	EI-127	Dipyridamole	4 mM	322	298	16.77	9.732	6.612	0.529	0	-0.674	-0.006	false
02089:N16	2089	N16	Biomol4	BIOMOL	DL-102	Clindamycin palmitate	4.7 mM	349	284	11.175	13.38	5.27	2.853	0.353	-0.63	-0.002	false
02089:N17	2089	N17	Biomol4	BIOMOL	EI-128	Ethacrynic acid	6.6 mM	366	277	7.104	10.108	0.081	4.015	0	-0.674	-0.006	false
02089:N18	2089	N18	Biomol4	BIOMOL	DL-164	Diclazuril	4.9 mM	355	288	13.521	7.639	2.839	2.189	0	-0.674	-0.006	false
02089:N19	2089	N19	Biomol4	BIOMOL	EI-131	Indomethacin	5.6 mM	324	286	11.111	5.944	0.061	2.521	0	-0.674	-0.006	false
02089:N20	2089	N20	Biomol4	BIOMOL	DL-302	Didanosine	8.5 mM	329	228	9.422	11.842	2.944	12.15	0	-0.674	-0.006	false
02089:N21	2089	N21	Biomol4	BIOMOL	EI-133	Naproxen	8.7 mM	348	256	6.034	8.984	1.47	7.502	0	-0.674	-0.006	false
02089:N22	2089	N22	Biomol4	BIOMOL	DL-199	Dolasetron	6.2 mM	378	341	7.937	6.158	2.141	0	0.298	-0.637	-0.002	false
02089:O03	2089	O03	Biomol4	BIOMOL	AC-280	Cimetidine	7.9 mM	366	325	7.65	14.462	3.56	0	0	-0.674	-0.006	false
02089:O04	2089	O04	Biomol4	BIOMOL	DL-101	Butenafine	6.3 mM	361	348	10.803	8.908	1.83	0	0	-0.674	-0.006	false
02089:O05	2089	O05	Biomol4	BIOMOL	AC-282	Tiotidine	6.4 mM	408	297	8.088	7.071	1.386	0.695	0	-0.674	-0.006	false
02089:O06	2089	O06	Biomol4	BIOMOL	DL-200	Dorzolamide	6.2 mM	345	301	10.145	8.638	1.175	0.031	0	-0.674	-0.006	false
02089:O07	2089	O07	Biomol4	BIOMOL	DL-555	Zonisamide	9.4 mM	344	267	6.105	9.738	0.885	5.675	0	-0.674	-0.006	false
02089:O08	2089	O08	Biomol4	BIOMOL	DL-212	Escitalopram	6.2 mM	305	270	25.574	37.778	32.742	6.083	14.855	1.206	0.197	false
02089:O09	2089	O09	Biomol4	BIOMOL	DL-556	Zoledronic acid	7.4 mM	310	345	9.032	11.304	2.288	0.101	0.034	-0.67	-0.006	false
02089:O10	2089	O10	Biomol4	BIOMOL	DL-209	Eprosartan	4.7 mM	382	308	10.471	10.39	2.649	0	2.458	-0.363	0.027	false
02089:O11	2089	O11	Biomol4	BIOMOL	AC-322	Naltrexone HCl	5.9 mM	383	277	6.266	11.552	0.518	4.015	0	-0.674	-0.006	false
02089:O12	2089	O12	Biomol4	BIOMOL	DL-119	Sodium phenylacetate	12.6 mM	281	268	10.32	4.478	1.66	10.278	0	-0.674	-0.006	false
02089:O13	2089	O13	Biomol4	BIOMOL	DL-560	zolmitriptan	6.6 mM	310	277	10.323	10.83	2.858	4.116	0	-0.674	-0.006	false
02089:O14	2089	O14	Biomol4	BIOMOL	DL-551	Ozagrel	8.8 mM	336	266	7.738	15.038	4.031	5.841	0	-0.674	-0.006	false
02089:O15	2089	O15	Biomol4	BIOMOL	AC-408	Memantine HCl	11.2 mM	279	251	46.237	43.426	51.292	13.422	34.6	3.706	0.467	false
02089:O16	2089	O16	Biomol4	BIOMOL	DL-217	Entacapone	6.6 mM	351	303	15.67	10.891	6.662	0	1.769	-0.451	0.018	false
02089:O17	2089	O17	Biomol4	BIOMOL	AC-439	Aniracetam	9.1 mM	305	272	19.672	9.191	8.269	5.751	0	-0.674	-0.006	false
02089:O18	2089	O18	Biomol4	BIOMOL	AP-302	Bleomycin sulfate	1.4 mM	281	252	13.167	15.476	8.162	12.934	0	-0.674	-0.006	false
02089:O19	2089	O19	Biomol4	BIOMOL	AC-501	Riluzole HCl	8.5 mM	352	263	12.784	7.605	2.296	6.339	0	-0.674	-0.006	false
02089:O20	2089	O20	Biomol4	BIOMOL	AR-100	Bopindolol malonate	5.3 mM	393	264	10.178	9.091	1.52	6.173	0	-0.674	-0.006	false
02089:O21	2089	O21	Biomol4	BIOMOL	AC-508	Propofol	11.2 mM	304	318	9.539	7.233	0.25	1.066	0	-0.674	-0.006	false
02089:O22	2089	O22	Biomol4	BIOMOL	AR-102	Guanfacine HCl	7.1 mM	355	335	19.437	9.254	8.148	0	0	-0.674	-0.006	false
02089:P03	2089	P03	Biomol4	BIOMOL	EI-160	Clofibrate	8.2 mM	300	316	6.667	8.544	1.338	1.71	0	-0.674	-0.006	false
02089:P04	2089	P04	Biomol4	BIOMOL	DL-192	Enalaprilat	5.7 mM	298	325	10.067	4.615	1.74	2.032	0	-0.674	-0.006	false
02089:P05	2089	P05	Biomol4	BIOMOL	EI-164	Ibuprofen	9.7 mM	321	268	6.854	5.224	3.567	5.509	0	-0.674	-0.006	false
02089:P06	2089	P06	Biomol4	BIOMOL	DL-108	Fluvastatin Na	4.9 mM	286	271	49.301	20.664	37.265	8.975	0	-0.674	-0.006	false
02089:P07	2089	P07	Biomol4	BIOMOL	EI-165	Benserazide HCl	7.8 mM	314	238	6.369	5.462	3.739	10.49	0	-0.674	-0.006	false
02089:P08	2089	P08	Biomol4	BIOMOL	DL-155	Fosinopril	3.5 mM	298	278	5.034	9.712	1.657	5.882	0	-0.674	-0.006	false
02089:P09	2089	P09	Biomol4	BIOMOL	EI-166	Debrisoquin sulfate	11.4 mM	313	341	9.904	6.745	0.34	0	0	-0.674	-0.006	false
02089:P10	2089	P10	Biomol4	BIOMOL	DL-215	Gemcitabine HCl	7.6 mM	262	232	22.901	11.638	12.279	19.313	0	-0.674	-0.006	false
02089:P11	2089	P11	Biomol4	BIOMOL	EI-167	Methiothepin maleate	5.6 mM	292	292	36.986	41.438	43.372	4.523	34.835	3.736	0.47	false
02089:P12	2089	P12	Biomol4	BIOMOL	DL-243	Ginkgolide a	4.9 mM	280	261	8.571	7.28	0.898	11.601	0	-0.674	-0.006	false
02089:P13	2089	P13	Biomol4	BIOMOL	EI-168	Bumetanide	5.5 mM	280	228	8.929	5.263	2.08	17.079	0	-0.674	-0.006	false
02089:P14	2089	P14	Biomol4	BIOMOL	DL-166	Granisetron	6.4 mM	280	290	11.429	6.207	0.349	6.787	0	-0.674	-0.006	false
02089:P15	2089	P15	Biomol4	BIOMOL	EI-180	Neomycin sulfate	3.3 mM	331	308	8.459	9.091	0.311	0	0	-0.674	-0.006	false
02089:P16	2089	P16	Biomol4	BIOMOL	DL-105	Nedaplatin	6.6 mM	319	295	4.075	5.763	5.139	1.027	2.485	-0.36	0.028	false
02089:P17	2089	P17	Biomol4	BIOMOL	EI-206	Auranofin	2.9 mM	90	132	100	99.242	128.787	63.6	63.38	7.35	0.86	true
02089:P18	2089	P18	Biomol4	BIOMOL	DL-303	Oxaliplatin	5 mM	307	294	3.909	3.741	6.693	1.777	4.709	-0.078	0.058	false
02089:P19	2089	P19	Biomol4	BIOMOL	EI-213	Captopril	9.2 mM	297	278	11.448	13.309	5.412	6.043	0	-0.674	-0.006	false
02089:P20	2089	P20	Biomol4	BIOMOL	DL-174	Anethole, trans-	13.5 mM	283	295	7.067	4.068	4.239	5.474	0	-0.674	-0.006	false
02089:P21	2089	P21	Biomol4	BIOMOL	EI-216	Docebenone	6.1 mM	278	289	11.871	8.997	2.643	7.275	0	-0.674	-0.006	false
02089:P22	2089	P22	Biomol4	BIOMOL	DL-546	Atazanavir	2.8 mM	338	309	5.621	5.178	4.467	0	3.969	-0.172	0.048	false
02090:A03	2090	A03	Biomol4	BIOMOL	DL-545	Mycophenolate mofetil	4.6 mM	311	293	3.859	3.413	5.3	0	4.902	0.086	0.061	false
02090:A04	2090	A04	Biomol4	BIOMOL	DL-363	Clobetasol propionate	4.3 mM	326	278	7.362	7.914	0.355	0	0	-0.674	0	false
02090:A05	2090	A05	Biomol4	BIOMOL	DL-544	Etoricoxib	5.6 mM	289	275	5.882	7.636	0.893	2.113	0	-0.674	0	false
02090:A06	2090	A06	Biomol4	BIOMOL	DL-364	Closantel	3 mM	258	276	6.202	4.71	2.721	7.249	0	-0.674	0	false
02090:A07	2090	A07	Biomol4	BIOMOL	DL-103	Clofarabine	6.6 mM	236	215	5.508	20	7.524	17.417	0	-0.674	0	false
02090:A08	2090	A08	Biomol4	BIOMOL	DL-365	Corticosterone	5.8 mM	288	256	4.514	6.25	2.841	2.278	0	-0.674	0	false
02090:A09	2090	A09	Biomol4	BIOMOL	DL-219	Cabergoline	4.4 mM	289	296	32.526	30.068	33.83	2.113	29.671	3.929	0.368	false
02090:A10	2090	A10	Biomol4	BIOMOL	DL-366	Crotamiton	9.8 mM	287	297	6.272	9.428	0.642	2.444	0	-0.674	0	false
02090:A11	2090	A11	Biomol4	BIOMOL	DL-207	Dilazep	3.3 mM	245	248	36.735	53.226	53.092	9.403	26.469	3.432	0.329	false
02090:A12	2090	A12	Biomol4	BIOMOL	DL-367	Cyclophosphamide monohydrate	7.7 mM	242	229	2.893	7.86	2.865	13.591	0	-0.674	0	false
02090:A13	2090	A13	Biomol4	BIOMOL	DL-213	Ibandronate	6.3 mM	270	234	6.296	8.12	0.259	7.94	0	-0.674	0	false
02090:A14	2090	A14	Biomol4	BIOMOL	DL-368	Cyproterone acetate	4.8 mM	297	253	14.141	10.672	7.119	0.787	3.008	-0.208	0.037	false
02090:A15	2090	A15	Biomol4	BIOMOL	DL-202	Imipenem	6.7 mM	317	284	7.256	10.915	2.387	0	0	-0.674	0	false
02090:A16	2090	A16	Biomol4	BIOMOL	DL-369	Cyclocytidine HCl	8.9 mM	251	239	11.554	7.95	3.365	10.078	0	-0.674	0	false
02090:A17	2090	A17	Biomol4	BIOMOL	DL-156	Lomustine	8.6 mM	332	261	6.325	4.981	2.443	0	1.167	-0.493	0.014	false
02090:A18	2090	A18	Biomol4	BIOMOL	DL-370	Cytarabine	8.2 mM	231	229	8.225	8.734	1.545	15.414	0	-0.674	0	false
02090:A19	2090	A19	Biomol4	BIOMOL	DL-543	Iloprost	5.5 mM	252	276	7.54	2.899	3.041	8.244	0	-0.674	0	false
02090:A20	2090	A20	Biomol4	BIOMOL	DL-371	Dacarbazine	11 mM	282	282	7.447	3.546	2.652	3.273	0	-0.674	0	false
02090:A21	2090	A21	Biomol4	BIOMOL	DL-244	Lomerizine HCl	4.3 mM	305	251	18.689	17.131	14.893	0	13.571	1.431	0.168	false
02090:A22	2090	A22	Biomol4	BIOMOL	DL--372	Danazol	5.9 mM	336	274	19.345	20.073	17.427	0	16.424	1.873	0.204	false
02090:B03	2090	B03	Biomol4	BIOMOL	DL-439	Mebendazol	6.8 mM	272	225	21.691	30.222	26.225	9.429	7.851	0.544	0.097	false
02090:B04	2090	B04	Biomol4	BIOMOL	DL-514	Tetracycline	4.5 mM	308	328	6.169	8.232	0.271	0	0	-0.674	0	false
02090:B05	2090	B05	Biomol4	BIOMOL	DL-440	Medroxyprogesterone 17-acetate	16.4 mM	331	302	8.157	13.245	4.665	0	0	-0.674	0	false
02090:B06	2090	B06	Biomol4	BIOMOL	DL-169	Tenatoprazole	5.8 mM	316	354	12.342	13.277	7.667	0	6.55	0.342	0.081	false
02090:B07	2090	B07	Biomol4	BIOMOL	DL-441	Mefenamic acid	8.3 mM	286	272	6.294	12.868	3.074	2.61	0	-0.674	0	false
02090:B08	2090	B08	Biomol4	BIOMOL	DL-190	Temozolomide	10.3 mM	270	308	9.259	7.468	1.392	5.261	0	-0.674	0	false
02090:B09	2090	B09	Biomol4	BIOMOL	DL-442	Melphalan	6.6 mM	285	337	11.93	10.979	5.76	2.775	2.184	-0.336	0.027	false
02090:B10	2090	B10	Biomol4	BIOMOL	DL-206	Tibolone	6.4 mM	302	322	8.609	4.969	0.825	0	0	-0.674	0	false
02090:B11	2090	B11	Biomol4	BIOMOL	DL-443	Methyldopa	9.5 mM	249	304	10.442	7.566	2.303	8.741	0	-0.674	0	false
02090:B12	2090	B12	Biomol4	BIOMOL	DL-515	Tioconazole	5.2 mM	268	310	7.463	4.839	1.733	5.592	0	-0.674	0	false
02090:B13	2090	B13	Biomol4	BIOMOL	DL-444	Methylprednisolone	5.3 mM	286	250	5.245	4.4	3.62	2.61	0.226	-0.639	0.003	false
02090:B14	2090	B14	Biomol4	BIOMOL	DL-516	Tinidazole	8.1 mM	241	322	8.299	7.764	0.917	10.066	0	-0.674	0	false
02090:B15	2090	B15	Biomol4	BIOMOL	DL-445	Metoprolol tartrate	7.5 mM	245	337	13.469	11.573	7.273	9.403	0	-0.674	0	false
02090:B16	2090	B16	Biomol4	BIOMOL	DL-517	Tobramycin (free base)	4.3 mM	240	330	7.083	8.182	0.345	10.232	0	-0.674	0	false
02090:B17	2090	B17	Biomol4	BIOMOL	DL-446	Methimazole	17.5 mM	243	330	7.407	10.909	2.491	9.735	0	-0.674	0	false
02090:B18	2090	B18	Biomol4	BIOMOL	DL-188	Tosufloxacin	4.9 mM	320	359	2.5	9.192	2.209	0	0	-0.674	0	false
02090:B19	2090	B19	Biomol4	BIOMOL	DL-447	Metronidazole	11.7 mM	340	331	5	5.438	3.065	0	2.553	-0.278	0.032	false
02090:B20	2090	B20	Biomol4	BIOMOL	DL-518	Topotecan	4.7 mM	230	299	4.783	7.692	1.637	11.889	0	-0.674	0	false
02090:B21	2090	B21	Biomol4	BIOMOL	DL-448	Miconazole	4.8 mM	303	321	20.462	11.838	12.438	0	3.976	-0.058	0.049	false
02090:B22	2090	B22	Biomol4	BIOMOL	DL-519	Toremifene	4.9 mM	347	322	23.343	26.398	24.715	0	21.299	2.63	0.264	false
02090:C03	2090	C03	Biomol4	BIOMOL	DL-138	Lofexidine	7.7 mM	353	378	13.314	9.259	5.538	0	1.609	-0.425	0.02	false
02090:C04	2090	C04	Biomol4	BIOMOL	DL-373	Dehydroepiandrosterone	6.9 mM	354	336	9.887	9.226	3.074	0	2.54	-0.28	0.032	false
02090:C05	2090	C05	Biomol4	BIOMOL	DL-167	Meropenem	5.2 mM	340	322	7.353	9.627	1.552	0	0	-0.674	0	false
02090:C06	2090	C06	Biomol4	BIOMOL	DL-154	Desloratadine	6.4 mM	271	291	74.908	70.103	92.124	5.095	83.183	12.23	1.033	true
02090:C07	2090	C07	Biomol4	BIOMOL	DL-205	Nifekalant HCl	4.9 mM	271	299	9.225	10.368	3.405	5.095	0	-0.674	0	false
02090:C08	2090	C08	Biomol4	BIOMOL	DL-374	Dextromethorphan HBr	7.4 mM	299	355	43.144	35.211	45.003	0.456	37.096	5.081	0.46	false
02090:C09	2090	C09	Biomol4	BIOMOL	DL-309	Octreotide	2 mM	282	348	10.284	10.92	4.546	3.273	0.488	-0.599	0.006	false
02090:C10	2090	C10	Biomol4	BIOMOL	DL-375	Diclofenac, Na	6.8 mM	311	347	8.36	9.51	2.187	0	0.907	-0.534	0.011	false
02090:C11	2090	C11	Biomol4	BIOMOL	DL-194	Oseltamivir	6.4 mM	290	311	7.241	9.968	1.712	1.947	0	-0.674	0	false
02090:C12	2090	C12	Biomol4	BIOMOL	DL-376	2',3' - dideoxycytidine	9.5 mM	278	286	6.115	3.497	3.635	3.935	0	-0.674	0	false
02090:C13	2090	C13	Biomol4	BIOMOL	DL-196	Pamidronic acid	8.5 mM	305	269	10.82	5.948	1.436	0	0	-0.674	0	false
02090:C14	2090	C14	Biomol4	BIOMOL	DL-377	Diethylstilbestrol	7.5 mM	304	307	11.513	6.189	2.099	0	0	-0.674	0	false
02090:C15	2090	C15	Biomol4	BIOMOL	DL-197	Pramipexole	9.5 mM	265	296	11.321	11.486	5.683	6.089	0	-0.674	0	false
02090:C16	2090	C16	Biomol4	BIOMOL	DL-378	Diflunisal	8 mM	308	354	6.169	9.605	0.693	0	0	-0.674	0	false
02090:C17	2090	C17	Biomol4	BIOMOL	DL-310	Triptorelin	1.5 mM	299	363	9.699	5.785	0.524	0.456	0	-0.674	0	false
02090:C18	2090	C18	Biomol4	BIOMOL	DL-379	Disulfiram	6.7 mM	263	307	36.882	30.945	37.548	6.421	25.613	3.299	0.318	false
02090:C19	2090	C19	Biomol4	BIOMOL	NP-526	Rifamycin sv	2.9 mM	292	374	6.507	5.615	1.868	1.616	0	-0.674	0	false
02090:C20	2090	C20	Biomol4	BIOMOL	DL-204	Doxazosin mesylate	4.4 mM	285	307	18.246	18.893	15.815	2.775	12.134	1.208	0.151	false
02090:C21	2090	C21	Biomol4	BIOMOL	DL-198	Risedronic acid	7.1 mM	329	358	4.863	4.749	3.647	0	3.597	-0.116	0.045	false
02090:C22	2090	C22	Biomol4	BIOMOL	DL-380	Doxifluridine	8.1 mM	406	355	6.158	5.634	2.104	0	1.657	-0.417	0.021	false
02090:D03	2090	D03	Biomol4	BIOMOL	DL-449	Minocycline HCl	4.4 mM	354	378	9.04	6.878	0.822	0	0	-0.674	0	false
02090:D04	2090	D04	Biomol4	BIOMOL	DL-520	Tolfenamic acid	7.6 mM	305	355	10.492	7.324	2.169	0	0	-0.674	0	false
02090:D05	2090	D05	Biomol4	BIOMOL	DL-450	Mitoxantrone 2HCl	4.5 mM	6	9	100	66.667	107.575	97.186	0	-0.674	0	false
02090:D06	2090	D06	Biomol4	BIOMOL	DL-521	Tolmetin Na	7.8 mM	301	288	7.973	12.5	4.011	0.124	0	-0.674	0	false
02090:D07	2090	D07	Biomol4	BIOMOL	T-104	Taxol	2.3 mM	248	229	11.29	10.044	4.648	12.597	0	-0.674	0	false
02090:D08	2090	D08	Biomol4	BIOMOL	DL-522	Toltrazuril	4.7 mM	300	264	7.667	11.364	2.995	0.29	0	-0.674	0	false
02090:D09	2090	D09	Biomol4	BIOMOL	DL-452	Myclobutanil	6.9 mM	277	324	8.303	10.802	3.054	4.101	0	-0.674	0	false
02090:D10	2090	D10	Biomol4	BIOMOL	DL-523	Tramadol HCl	7.6 mM	282	306	10.993	9.15	3.809	3.273	0	-0.674	0	false
02090:D11	2090	D11	Biomol4	BIOMOL	DL-453	Nadifloxacin	5.5 mM	249	314	8.835	5.414	0.352	8.741	0	-0.674	0	false
02090:D12	2090	D12	Biomol4	BIOMOL	DL-524	Triamcinolone	5.1 mM	273	273	5.128	2.93	4.735	4.764	0	-0.674	0	false
02090:D13	2090	D13	Biomol4	BIOMOL	DL-454	Nabumetone	8.8 mM	295	274	19.322	17.518	15.616	1.118	12.933	1.332	0.161	false
02090:D14	2090	D14	Biomol4	BIOMOL	DL-525	Trimethoprim	6.9 mM	278	317	6.475	10.095	1.255	3.935	0	-0.674	0	false
02090:D15	2090	D15	Biomol4	BIOMOL	DL-455	Naphazoline HCl	9.5 mM	258	265	23.256	21.132	20.955	7.249	11.871	1.167	0.147	false
02090:D16	2090	D16	Biomol4	BIOMOL	DL-158	Tropisetron HCl	7 mM	277	347	28.881	31.412	32.18	4.101	25.117	3.222	0.312	false
02090:D17	2090	D17	Biomol4	BIOMOL	DL-456	Nefazodone	4.3 mM	295	285	22.034	19.649	19.043	1.118	15.809	1.778	0.196	false
02090:D18	2090	D18	Biomol4	BIOMOL	DL-526	Tylosin tartrate	2.2 mM	275	326	4.364	8.896	1.09	4.432	0	-0.674	0	false
02090:D19	2090	D19	Biomol4	BIOMOL	DL-457	Niflumic acid	7.1 mM	304	333	6.908	6.006	1.308	0	0.489	-0.599	0.006	false
02090:D20	2090	D20	Biomol4	BIOMOL	DL-527	Valaciclovir	6.2 mM	285	240	5.263	7.917	1.137	4.242	0	-0.674	0	false
02090:D21	2090	D21	Biomol4	BIOMOL	DL-458	Norethindrone	6.7 mM	311	305	26.045	22.295	23.757	0	20.313	2.477	0.252	false
02090:D22	2090	D22	Biomol4	BIOMOL	DL-528	Vecuronium Br	3.6 mM	313	332	9.265	4.518	0.675	0	0	-0.674	0	false
02090:E03	2090	E03	Biomol4	BIOMOL	DL-187	Rocuronium bromide	3.8 mM	373	340	9.383	8.235	2.02	0	0.985	-0.522	0.012	false
02090:E04	2090	E04	Biomol4	BIOMOL	DL-181	Doxofylline	7.5 mM	346	308	9.827	9.416	3.164	0	2.882	-0.227	0.036	false
02090:E05	2090	E05	Biomol4	BIOMOL	DL-148	Ricobendazole	7.1 mM	315	210	2.857	10.952	0.718	7.533	0	-0.674	0	false
02090:E06	2090	E06	Biomol4	BIOMOL	DL-381	Doxycycline HCl	4.5 mM	275	285	7.636	7.018	0.079	4.432	0	-0.674	0	false
02090:E07	2090	E07	Biomol4	BIOMOL	DL-176	Sulbactam	8.6 mM	290	275	9.31	10.909	3.846	1.947	0.151	-0.651	0.002	false
02090:E08	2090	E08	Biomol4	BIOMOL	PI-152	Enalapril	5.3 mM	255	315	9.412	8.571	2.276	7.746	0	-0.674	0	false
02090:E09	2090	E09	Biomol4	BIOMOL	DL-143	Thiamphenicol glycinate	4.8 mM	330	315	8.182	8.889	1.624	0	0.795	-0.551	0.01	false
02090:E10	2090	E10	Biomol4	BIOMOL	DL-383	Enoxacin	6.2 mM	267	287	8.614	8.362	1.562	5.758	0	-0.674	0	false
02090:E11	2090	E11	Biomol4	BIOMOL	DL-175	Tulobuterol	8.8 mM	266	277	10.526	7.581	2.374	5.924	0	-0.674	0	false
02090:E12	2090	E12	Biomol4	BIOMOL	DL-384	Enrofloxacin	5.6 mM	263	271	6.464	6.273	1.437	6.421	0	-0.674	0	false
02090:E13	2090	E13	Biomol4	BIOMOL	NP-461	Vinorelbine	2.6 mM	255	236	65.098	58.051	76.675	10.022	60.401	8.696	0.75	false
02090:E14	2090	E14	Biomol4	BIOMOL	DL-385	Ethisterone	6.4 mM	266	272	19.549	19.118	16.901	5.924	10.807	1.002	0.134	false
02090:E15	2090	E15	Biomol4	BIOMOL	DL-220	Vindesine	2.7 mM	266	250	73.308	72.8	92.879	5.924	86.467	12.74	1.073	true
02090:E16	2090	E16	Biomol4	BIOMOL	DL-386	Esomeprazole potassium	5.8 mM	300	322	10.667	11.491	5.22	0.29	3.949	-0.062	0.049	false
02090:E17	2090	E17	Biomol4	BIOMOL	DL-210	Salmeterol	4.8 mM	271	285	46.863	64.561	68.265	5.095	44.588	6.243	0.553	false
02090:E18	2090	E18	Biomol4	BIOMOL	BL-093	Estradiol	7.3 mM	312	272	11.859	15.809	9.102	0	4.935	0.091	0.061	false
02090:E19	2090	E19	Biomol4	BIOMOL	T-117	Vincristine sulfate	2.4 mM	272	274	50	50	60.271	4.93	54.657	7.805	0.678	false
02090:E20	2090	E20	Biomol4	BIOMOL	DL-388	Estriol	6.9 mM	316	289	5.063	9.343	0.278	0	0	-0.674	0	false
02090:E21	2090	E21	Biomol4	BIOMOL	DL-312	Acemetacin	4.8 mM	324	303	5.556	13.531	3.014	0	0	-0.674	0	false
02090:E22	2090	E22	Biomol4	BIOMOL	BL-090	Estrone	7.4 mM	357	313	10.084	10.543	4.14	0	3.536	-0.126	0.044	false
02090:F03	2090	F03	Biomol4	BIOMOL	DL-459	Norfloxacin	6.3 mM	378	344	8.466	7.849	1.095	0	0.586	-0.584	0.007	false
02090:F04	2090	F04	Biomol4	BIOMOL	DL-529	Venlafaxine HCl	7.2 mM	314	282	18.79	9.574	9.658	0	0.573	-0.586	0.007	false
02090:F05	2090	F05	Biomol4	BIOMOL	DL-460	Nystatin	2.2 mM	312	259	5.769	9.653	0.442	0	0	-0.674	0	false
02090:F06	2090	F06	Biomol4	BIOMOL	DL-530	Vidarabine	7.5 mM	299	277	7.692	10.108	2.131	0.456	0	-0.674	0	false
02090:F07	2090	F07	Biomol4	BIOMOL	DL-461	Ofloxacin	5.5 mM	266	286	6.767	9.441	1.004	5.924	0	-0.674	0	false
02090:F08	2090	F08	Biomol4	BIOMOL	DL-531	Iproniazid	11.2 mM	257	300	9.728	5.333	0.227	7.415	0	-0.674	0	false
02090:F09	2090	F09	Biomol4	BIOMOL	DL-106	Oltipraz	8.8 mM	318	326	5.031	6.442	2.338	0	0.84	-0.544	0.01	false
02090:F10	2090	F10	Biomol4	BIOMOL	NA-103	Benzamil	6.3 mM	283	305	28.975	41.639	39.43	3.107	23.089	2.907	0.287	false
02090:F11	2090	F11	Biomol4	BIOMOL	DL-462	Omeprazole	5.8 mM	264	288	7.955	3.819	2.099	6.255	0	-0.674	0	false
02090:F12	2090	F12	Biomol4	BIOMOL	NA-139	Bupivacaine HCl	6.9 mM	257	268	13.23	4.478	2.119	7.415	0	-0.674	0	false
02090:F13	2090	F13	Biomol4	BIOMOL	DL-463	Oxcarbazepine	7.9 mM	268	237	2.612	10.127	1.473	7.665	0	-0.674	0	false
02090:F14	2090	F14	Biomol4	BIOMOL	NH-101	Astemizole	4.4 mM	109	105	98.165	98.095	128.342	60.705	66.364	9.621	0.824	false
02090:F15	2090	F15	Biomol4	BIOMOL	DL-464	Oxiconazole nitrate	4.7 mM	284	282	22.887	15.248	16.56	2.941	6.188	0.286	0.077	false
02090:F16	2090	F16	Biomol4	BIOMOL	NH-106	Ketotifen fumarate	6.5 mM	240	281	35.833	29.893	36.063	10.232	20.3	2.475	0.252	false
02090:F17	2090	F17	Biomol4	BIOMOL	DL-465	Oxacillin sodium monohydrate	5 mM	299	272	9.365	12.868	5.26	0.456	1.125	-0.5	0.014	false
02090:F18	2090	F18	Biomol4	BIOMOL	NH-107	Levocabastine HCl	4.8 mM	293	282	8.874	10.284	3.096	1.45	0.095	-0.66	0.001	false
02090:F19	2090	F19	Biomol4	BIOMOL	DL-466	Oxfendazole	6.3 mM	312	294	5.769	6.122	2.037	0	1.6	-0.426	0.02	false
02090:F20	2090	F20	Biomol4	BIOMOL	NO-101	Naloxone HCl	6.1 mM	297	261	9.091	5.364	0.205	0.787	0	-0.674	0	false
02090:F21	2090	F21	Biomol4	BIOMOL	DL-467	Oxibendazole	8 mM	262	259	16.031	19.305	14.527	6.587	4.402	0.008	0.055	false
02090:F22	2090	F22	Biomol4	BIOMOL	NO-102	Naloxonazine 2HCl	3.1 mM	350	331	18.857	16.012	14.227	0	11.601	1.125	0.144	false
02090:G03	2090	G03	Biomol4	BIOMOL	DL-313	Acetylsalicylic acid	11.1 mM	339	353	10.619	7.365	2.289	0	0	-0.674	0	false
02090:G04	2090	G04	Biomol4	BIOMOL	DL-390	Etidronate 2Na	9.8 mM	310	313	9.032	10.863	3.615	0	1.636	-0.421	0.02	false
02090:G05	2090	G05	Biomol4	BIOMOL	DL-314	Acipimox	13 mM	285	276	7.018	8.696	0.659	2.775	0	-0.674	0	false
02090:G06	2090	G06	Biomol4	BIOMOL	DL-170	Etretinate	5.6 mM	295	291	5.763	10.653	1.14	1.118	0	-0.674	0	false
02090:G07	2090	G07	Biomol4	BIOMOL	DL-315	Aceclofenac	5.6 mM	256	275	7.031	7.636	0.075	7.581	0	-0.674	0	false
02090:G08	2090	G08	Biomol4	BIOMOL	DL-563	Trichloromethiazide	5.3 mM	289	306	5.536	10.458	0.842	2.113	0	-0.674	0	false
02090:G09	2090	G09	Biomol4	BIOMOL	DL-316	Acycloguanosine	8.9 mM	310	327	5.806	5.199	2.659	0	2.123	-0.345	0.026	false
02090:G10	2090	G10	Biomol4	BIOMOL	DL-392	Famciclovir	6.2 mM	342	324	7.602	7.716	0.387	0	0.168	-0.648	0.002	false
02090:G11	2090	G11	Biomol4	BIOMOL	DL-317	3'-azido-3'-deoxythymidine	7.5 mM	306	316	10.784	7.595	2.568	0	0	-0.674	0	false
02090:G12	2090	G12	Biomol4	BIOMOL	DL-393	Fenbendazole	6.7 mM	99	97	89.899	77.32	107.865	63.98	32.365	4.346	0.402	false
02090:G13	2090	G13	Biomol4	BIOMOL	DL-318	Allopurinol	14.7 mM	290	274	8.276	7.299	0.574	1.947	0	-0.674	0	false
02090:G14	2090	G14	Biomol4	BIOMOL	DL-394	Fenbufen	7.9 mM	313	327	9.904	7.339	1.762	0	0	-0.674	0	false
02090:G15	2090	G15	Biomol4	BIOMOL	PR-123	Alendronate	8.1 mM	305	285	11.475	9.474	4.379	0	2.507	-0.286	0.031	false
02090:G16	2090	G16	Biomol4	BIOMOL	DL-395	Fenoldopam mesylate	6.5 mM	319	308	9.404	6.818	1.04	0	0	-0.674	0	false
02090:G17	2090	G17	Biomol4	BIOMOL	DL-320	Altretamine	9.5 mM	291	309	6.873	5.178	1.915	1.781	0	-0.674	0	false
02090:G18	2090	G18	Biomol4	BIOMOL	DL-396	Fenoprofen	8.3 mM	325	292	10.462	7.192	2.055	0	0	-0.674	0	false
02090:G19	2090	G19	Biomol4	BIOMOL	DL321	Albendazole	7.5 mM	280	248	37.143	35.484	40.922	3.604	36.144	4.933	0.449	false
02090:G20	2090	G20	Biomol4	BIOMOL	DL-397	Fenofibrate	5.5 mM	305	279	9.508	9.319	2.87	0	2.808	-0.239	0.035	false
02090:G21	2090	G21	Biomol4	BIOMOL	DL-565	Sumatriptan Succinate	4.8 mM	317	294	4.416	5.102	3.717	0	2.961	-0.215	0.037	false
02090:G22	2090	G22	Biomol4	BIOMOL	DL-398	Finasteride	5.4 mM	347	332	7.781	5.723	0.885	0	0	-0.674	0	false
02090:H03	2090	H03	Biomol4	BIOMOL	DL-468	Pantoprazole	5.2 mM	336	366	9.226	13.388	5.527	0	1.182	-0.491	0.015	false
02090:H04	2090	H04	Biomol4	BIOMOL	AC-1053	Harmine	9.4 mM	295	253	59.322	68.775	80.094	1.118	68.582	9.965	0.851	true
02090:H05	2090	H05	Biomol4	BIOMOL	NS-710	Paroxetine HCl	6.1 mM	296	279	67.23	70.968	87.264	0.953	81.602	11.985	1.013	true
02090:H06	2090	H06	Biomol4	BIOMOL	NS-102	Cinanserin	5.9 mM	252	270	29.762	33.333	34.156	8.244	21.885	2.721	0.272	false
02090:H07	2090	H07	Biomol4	BIOMOL	DL-470	Pazufloxacin	6.3 mM	276	279	11.594	7.527	3.096	4.267	0	-0.674	0	false
02090:H08	2090	H08	Biomol4	BIOMOL	NS-107	Dibenzepine HCl	6.8 mM	282	316	20.213	8.861	10.169	3.273	0	-0.674	0	false
02090:H09	2090	H09	Biomol4	BIOMOL	DL-471	Pefloxacine mesylate	6 mM	323	281	6.502	5.694	1.817	0	1.087	-0.506	0.013	false
02090:H10	2090	H10	Biomol4	BIOMOL	NS-108	Dihydroergocristine mesylate	3.3 mM	320	234	36.25	36.325	40.877	2.679	37.625	5.163	0.467	false
02090:H11	2090	H11	Biomol4	BIOMOL	DL-472	Penciclovir	7.9 mM	297	271	6.397	4.059	3.039	0.787	0	-0.674	0	false
02090:H12	2090	H12	Biomol4	BIOMOL	NS-109	Fluperlapine	6.5 mM	255	243	40	45.679	50.116	8.606	35.206	4.787	0.437	false
02090:H13	2090	H13	Biomol4	BIOMOL	DL-473	Pentoxifylline	7.2 mM	305	286	6.23	6.294	1.589	0	1.439	-0.451	0.018	false
02090:H14	2090	H14	Biomol4	BIOMOL	NS-140	Fluoxetine HCl	6.5 mM	344	283	90.116	83.746	112.533	0	107.309	15.973	1.332	true
02090:H15	2090	H15	Biomol4	BIOMOL	DL-474	Pencillin v potassium	5.7 mM	356	304	9.551	4.934	0.18	0	0	-0.674	0	false
02090:H16	2090	H16	Biomol4	BIOMOL	NS-145	Ondansetron	6.8 mM	298	297	21.141	9.428	11.228	0.621	0	-0.674	0	false
02090:H17	2090	H17	Biomol4	BIOMOL	DL-475	Phenylbutazone	6.5 mM	311	315	11.576	5.397	1.587	0	0	-0.674	0	false
02090:H18	2090	H18	Biomol4	BIOMOL	NS-515	Ketanserin tartrate	5.1 mM	312	275	22.436	16.364	17.022	0	11.174	1.059	0.139	false
02090:H19	2090	H19	Biomol4	BIOMOL	DL-476	Piperacillin	3.9 mM	306	263	5.882	7.605	0.916	0	0	-0.674	0	false
02090:H20	2090	H20	Biomol4	BIOMOL	DL-562	Tiotropium Br	4.2 mM	333	277	10.21	11.913	5.192	0	3.326	-0.159	0.041	false
02090:H21	2090	H21	Biomol4	BIOMOL	DL-477	Pravastatin lactone	4.9 mM	336	301	8.333	12.292	4.122	0	0	-0.674	0	false
02090:H22	2090	H22	Biomol4	BIOMOL	NS-531	Mesoridazine besylate	5.2 mM	338	323	45.266	37.461	48.094	0	40.802	5.655	0.506	false
02090:I03	2090	I03	Biomol4	BIOMOL	GR-341	Amifostine	9.3 mM	396	312	6.818	9.936	1.388	0	0	-0.674	0	false
02090:I04	2090	I04	Biomol4	BIOMOL	DL-399	5-fluorouracil	15.4 mM	354	268	6.78	7.836	0.114	0	0	-0.674	0	false
02090:I05	2090	I05	Biomol4	BIOMOL	DL-324	Dl-aminoglutethimide	8.6 mM	316	253	5.063	6.719	2.12	0	0.372	-0.617	0.005	false
02090:I06	2090	I06	Biomol4	BIOMOL	DL-400	Flurbiprofen	8.2 mM	279	270	7.527	7.037	0.143	3.77	0	-0.674	0	false
02090:I07	2090	I07	Biomol4	BIOMOL	DL-325	4-aminosalicylic acid	13.1 mM	295	274	4.407	8.759	1.155	1.118	0	-0.674	0	false
02090:I08	2090	I08	Biomol4	BIOMOL	DL-401	Fleroxacin	5.4 mM	297	291	9.764	20.962	11.23	0.787	0	-0.674	0	false
02090:I09	2090	I09	Biomol4	BIOMOL	DL-326	5-aminosalicylic acid	13.1 mM	287	279	5.923	4.301	3.207	2.444	0	-0.674	0	false
02090:I10	2090	I10	Biomol4	BIOMOL	DL-402	Florfenicol	5.6 mM	271	275	9.225	8	1.742	5.095	0	-0.674	0	false
02090:I11	2090	I11	Biomol4	BIOMOL	DL-327	Ampicillin trihydrate	5.7 mM	282	255	11.702	12.941	6.976	3.273	2.287	-0.32	0.028	false
02090:I12	2090	I12	Biomol4	BIOMOL	DL-403	Floxuridine	8.1 mM	271	241	8.856	8.714	1.981	6.359	0	-0.674	0	false
02090:I13	2090	I13	Biomol4	BIOMOL	DL-328	Ampiroxicam	4.5 mM	253	263	13.439	9.125	5.532	8.078	0	-0.674	0	false
02090:I14	2090	I14	Biomol4	BIOMOL	DL-404	Fluocinolone acetonide	4.4 mM	304	245	6.908	6.531	0.94	0.455	0.197	-0.644	0.002	false
02090:I15	2090	I15	Biomol4	BIOMOL	DL-329	Apramycin	3.7 mM	343	281	16.035	10.32	8.22	0	2.647	-0.264	0.033	false
02090:I16	2090	I16	Biomol4	BIOMOL	DL-405	Flubendazole	6.4 mM	207	114	81.159	79.825	103.402	42.646	60.514	8.713	0.751	false
02090:I17	2090	I17	Biomol4	BIOMOL	NP-016	Artemisinin	7.1 mM	314	284	6.688	13.732	3.962	0	0	-0.674	0	false
02090:I18	2090	I18	Biomol4	BIOMOL	DL-406	Flutamide	7.2 mM	301	255	12.625	10.196	5.705	0.124	3.292	-0.164	0.041	false
02090:I19	2090	I19	Biomol4	BIOMOL	AC-166	Atenolol	7.5 mM	286	262	8.741	8.779	1.944	2.61	0	-0.674	0	false
02090:I20	2090	I20	Biomol4	BIOMOL	DL-407	Fluconazole	6.5 mM	306	273	10.784	9.158	3.665	0	2.164	-0.339	0.027	false
02090:I21	2090	I21	Biomol4	BIOMOL	DL-332	Atracurium besylate	2.2 mM	328	275	7.622	4.727	1.698	0	0	-0.674	0	false
02090:I22	2090	I22	Biomol4	BIOMOL	DL-408	Formestane	6.6 mM	355	291	13.521	18.213	11.974	0	7.033	0.417	0.087	false
02090:J03	2090	J03	Biomol4	BIOMOL	DL-478	Pranoprofen	7.8 mM	387	327	4.393	7.034	2.377	0	0	-0.674	0	false
02090:J04	2090	J04	Biomol4	BIOMOL	NS-835	Thioridazine HCl	5.4 mM	46	40	95.652	100	127.891	84.289	37.885	5.203	0.47	false
02090:J05	2090	J05	Biomol4	BIOMOL	DL-479	Prednisolone	5.5 mM	311	276	2.572	6.159	4.287	0	0.616	-0.579	0.008	false
02090:J06	2090	J06	Biomol4	BIOMOL	PD-125	Cilostamide	5.8 mM	270	264	8.889	10.227	3.067	5.261	0	-0.674	0	false
02090:J07	2090	J07	Biomol4	BIOMOL	DL-480	Progesterone	6.4 mM	253	261	43.874	44.828	52.276	8.078	42.631	5.939	0.529	false
02090:J08	2090	J08	Biomol4	BIOMOL	PD-130	Etazolate	6.9 mM	323	317	8.978	6.94	0.822	0	0	-0.674	0	false
02090:J09	2090	J09	Biomol4	BIOMOL	DL-481	Procarbazine HCl	9 mM	284	295	13.38	9.492	5.748	2.941	0	-0.674	0	false
02090:J10	2090	J10	Biomol4	BIOMOL	PD-140	Isobutylmethylxanthine	9 mM	295	248	9.831	5.242	0.236	1.118	0	-0.674	0	false
02090:J11	2090	J11	Biomol4	BIOMOL	DL-482	Prothionamide	11.1 mM	298	239	7.383	7.113	0.193	2.29	0	-0.674	0	false
02090:J12	2090	J12	Biomol4	BIOMOL	PD-141	Irsogladine maleate	7.8 mM	260	278	11.154	10.791	5.076	6.918	0	-0.674	0	false
02090:J13	2090	J13	Biomol4	BIOMOL	DL-483	Prednisone	5.6 mM	265	230	12.83	9.565	5.408	9.578	0	-0.674	0	false
02090:J14	2090	J14	Biomol4	BIOMOL	PD-152	Milrinone	9.5 mM	302	274	9.934	9.124	3.036	0	2.351	-0.31	0.029	false
02090:J15	2090	J15	Biomol4	BIOMOL	DL-484	Pregnenolone	6.3 mM	336	276	12.798	7.971	4.265	0	0	-0.674	0	false
02090:J16	2090	J16	Biomol4	BIOMOL	PD-175	Rolipram	7.3 mM	312	291	15.064	9.622	7.038	0	1.728	-0.406	0.021	false
02090:J17	2090	J17	Biomol4	BIOMOL	DL-485	Primaquine phosphate	7.7 mM	297	251	9.428	7.171	1.304	0.787	0	-0.674	0	false
02090:J18	2090	J18	Biomol4	BIOMOL	PD-179	Siguazodan	7 mM	275	285	12	8.07	3.767	4.432	0	-0.674	0	false
02090:J19	2090	J19	Biomol4	BIOMOL	DL-486	Praziquantel	6.4 mM	328	244	12.805	12.705	7.595	0.657	6.864	0.39	0.085	false
02090:J20	2090	J20	Biomol4	BIOMOL	PD180	Trequinsin	4.9 mM	299	288	18.395	23.611	19.235	0.456	13.239	1.379	0.164	false
02090:J21	2090	J21	Biomol4	BIOMOL	DL-487	Pyrantel pamoate	3.4 mM	326	311	10.736	5.466	1.038	0	0	-0.674	0	false
02090:J22	2090	J22	Biomol4	BIOMOL	PD-185	Vinpocetine	5.7 mM	319	306	19.122	18.627	16.253	0	16.013	1.81	0.199	false
02090:K03	2090	K03	Biomol4	BIOMOL	DL-333	Azaperone	6.1 mM	410	314	15.854	10.828	8.448	0	3.57	-0.121	0.044	false
02090:K04	2090	K04	Biomol4	BIOMOL	DL-409	Ftorafur	10 mM	318	294	5.975	9.184	0.259	0	0	-0.674	0	false
02090:K05	2090	K05	Biomol4	BIOMOL	T-116	Vinblastine sulfate	2.5 mM	256	225	89.063	92	117.581	12.08	101.303	15.041	1.258	true
02090:K06	2090	K06	Biomol4	BIOMOL	DL-410	Furosemide	6 mM	319	317	5.643	9.148	0.002	0	0	-0.674	0	false
02090:K07	2090	K07	Biomol4	BIOMOL	DL-335	Azithromycin	2.7 mM	262	226	32.824	35.398	37.787	10.884	23.845	3.025	0.296	false
02090:K08	2090	K08	Biomol4	BIOMOL	DL-411	Ganciclovir	7.8 mM	289	257	10.727	8.949	3.478	2.113	0	-0.674	0	false
02090:K09	2090	K09	Biomol4	BIOMOL	DL-336	Aztreonam	4.6 mM	303	299	9.901	7.692	2.007	0	0	-0.674	0	false
02090:K10	2090	K10	Biomol4	BIOMOL	DL-412	Gatifloxacin	5.3 mM	273	258	9.158	7.364	1.247	4.764	0	-0.674	0	false
02090:K11	2090	K11	Biomol4	BIOMOL	DL-337	Betamethasone	4 mM	287	234	6.62	7.265	0.629	5.124	0	-0.674	0	false
02090:K12	2090	K12	Biomol4	BIOMOL	DL-413	Gentamycin sulfate	4.2 mM	239	278	8.787	5.396	0.399	10.398	0	-0.674	0	false
02090:K13	2090	K13	Biomol4	BIOMOL	DL-338	Bifonazole	6.4 mM	264	218	15.909	9.174	7.326	12.17	0	-0.674	0	false
02090:K14	2090	K14	Biomol4	BIOMOL	DL-414	Gemfibrozil	8 mM	305	320	8.197	6.563	0	0	0	-0.674	0	false
02090:K15	2090	K15	Biomol4	BIOMOL	DL-339	Bisacodyl	5.5 mM	336	244	7.738	8.607	1.109	0.657	0	-0.674	0	false
02090:K16	2090	K16	Biomol4	BIOMOL	DL-415	Gliclazide	6.2 mM	338	250	8.284	8.8	1.634	0	0.997	-0.52	0.012	false
02090:K17	2090	K17	Biomol4	BIOMOL	DL-340	Bromhexine HCl	5.3 mM	327	291	10.703	11.684	5.382	0	4.241	-0.016	0.053	false
02090:K18	2090	K18	Biomol4	BIOMOL	DL-416	Glimepiride	4.1 mM	273	310	5.128	9.032	0.45	4.764	0	-0.674	0	false
02090:K19	2090	K19	Biomol4	BIOMOL	DL-341	Buspirone HCl	5.2 mM	278	224	16.906	15.625	12.566	8.637	2.862	-0.231	0.036	false
02090:K20	2090	K20	Biomol4	BIOMOL	DL-417	Guaifenesin	10.1 mM	338	280	4.438	10.357	0.011	0	0	-0.674	0	false
02090:K21	2090	K21	Biomol4	BIOMOL	DL-342	Canrenone	5.9 mM	359	308	5.014	11.039	0.878	0	0	-0.674	0	false
02090:K22	2090	K22	Biomol4	BIOMOL	DL-418	Hexestrol	7.4 mM	339	302	7.375	14.901	5.271	0	0	-0.674	0	false
02090:L03	2090	L03	Biomol4	BIOMOL	DL-488	Quinacrine 2HCl dihydrate	5 mM	146	95	99.315	96.842	128.281	56.596	70.537	10.268	0.876	true
02090:L04	2090	L04	Biomol4	BIOMOL	PD-190	Zaprinast	7.4 mM	328	269	10.366	8.178	2.68	0	0.604	-0.581	0.007	false
02090:L05	2090	L05	Biomol4	BIOMOL	DL-489	Quinapril HCl	4.6 mM	307	267	8.469	5.993	0.206	0	0	-0.674	0	false
02090:L06	2090	L06	Biomol4	BIOMOL	PD-195	Zardaverine	7.5 mM	290	274	40.69	23.723	35.186	1.947	16.597	1.9	0.206	false
02090:L07	2090	L07	Biomol4	BIOMOL	DL-159	Racecadotril	5.2 mM	298	260	6.711	7.692	0.264	0.621	0	-0.674	0	false
02090:L08	2090	L08	Biomol4	BIOMOL	PG-006 PGE1	Alprostadil	5.6 mM	285	278	16.491	5.396	5.086	2.775	0	-0.674	0	false
02090:L09	2090	L09	Biomol4	BIOMOL	DL-490	Ranolazine 2HCl	4.7 mM	319	239	9.718	6.276	0.882	1.668	0	-0.674	0	false
02090:L10	2090	L10	Biomol4	BIOMOL	PG-051	Misoprostol	5.2 mM	287	235	10.105	10.638	4.221	4.921	0	-0.674	0	false
02090:L11	2090	L11	Biomol4	BIOMOL	DL-491	Ramipril	4.8 mM	339	265	10.324	6.415	1.412	0	0	-0.674	0	false
02090:L12	2090	L12	Biomol4	BIOMOL	PI-146	Argatroban	3.9 mM	286	281	9.79	7.117	1.524	2.61	0	-0.674	0	false
02090:L13	2090	L13	Biomol4	BIOMOL	DL-147	Rebamipide	5.4 mM	256	223	8.203	4.484	1.455	12.485	0	-0.674	0	false
02090:L14	2090	L14	Biomol4	BIOMOL	PI-153	Cilastatin	5.6 mM	350	295	9.714	4.746	0.195	0	0	-0.674	0	false
02090:L15	2090	L15	Biomol4	BIOMOL	DL-492	Ribavirin	8.2 mM	302	259	16.887	12.355	10.256	0	5.893	0.24	0.073	false
02090:L16	2090	L16	Biomol4	BIOMOL	PR-117	Artesunate	5.2 mM	309	254	7.443	3.937	2.38	0	0	-0.674	0	false
02090:L17	2090	L17	Biomol4	BIOMOL	DL-566	Nelfinavir Mesylate	3 mM	283	232	18.021	12.5	11.165	6.191	0	-0.674	0	false
02090:L18	2090	L18	Biomol4	BIOMOL	RA-104	Picotamide	5.3 mM	321	246	9.034	10.976	3.696	0.253	1.352	-0.465	0.017	false
02090:L19	2090	L19	Biomol4	BIOMOL	DL-494	Rimantadine HCl	11.2 mM	274	274	43.796	27.372	39.961	4.598	19.314	2.322	0.24	false
02090:L20	2090	L20	Biomol4	BIOMOL	S104	Conduritol b epoxide	12.3 mM	312	230	7.051	14.783	4.958	3.488	0	-0.674	0	false
02090:L21	2090	L21	Biomol4	BIOMOL	ST-405	Propranolol	7.7 mM	304	264	52.303	46.591	59.516	0	54.442	7.771	0.676	false
02090:L22	2090	L22	Biomol4	BIOMOL	S-510	Mifepristone	4.7 mM	302	302	13.576	5.96	3.407	0	0	-0.674	0	false
02090:M03	2090	M03	Biomol4	BIOMOL	DL-343	Carbadox	7.6 mM	373	286	11.796	11.538	6.058	0	5.958	0.25	0.074	false
02090:M04	2090	M04	Biomol4	BIOMOL	DL-419	Hydrocortisone	5.5 mM	356	288	7.584	6.25	0.655	0	0	-0.674	0	false
02090:M05	2090	M05	Biomol4	BIOMOL	DL-344	Carboplatin	5.9 mM	332	262	6.024	7.252	1.062	0	0	-0.674	0	false
02090:M06	2090	M06	Biomol4	BIOMOL	DL-420	Hydrocortisone 21-acetate	4.9 mM	300	239	4.333	11.297	0.575	1.958	0	-0.674	0	false
02090:M07	2090	M07	Biomol4	BIOMOL	DL-345	Carbamazepine	8.5 mM	305	242	9.508	11.157	4.161	1.062	1.298	-0.473	0.016	false
02090:M08	2090	M08	Biomol4	BIOMOL	DL-421	17- hydroxyprogesterone	6.1 mM	305	289	15.082	6.92	5.154	0	0	-0.674	0	false
02090:M09	2090	M09	Biomol4	BIOMOL	DL-346	Cefoperazone acid	3.1 mM	331	253	12.387	5.138	1.983	0	0	-0.674	0	false
02090:M10	2090	M10	Biomol4	BIOMOL	DL-422	Idoxuridine	5.6 mM	276	266	9.058	5.263	0.299	4.267	0	-0.674	0	false
02090:M11	2090	M11	Biomol4	BIOMOL	DL-347	Cefotaxime acid	4.4 mM	287	244	10.105	4.918	0.204	3.101	0	-0.674	0	false
02090:M12	2090	M12	Biomol4	BIOMOL	DL-423	Ifosfamide	7.7 mM	275	249	12.727	10.04	5.668	4.432	0	-0.674	0	false
02090:M13	2090	M13	Biomol4	BIOMOL	DL-348	Ceftazidime	3.7 mM	262	266	4.198	4.511	4.287	6.587	0	-0.674	0	false
02090:M14	2090	M14	Biomol4	BIOMOL	DL-424	Imiquimod	8.3 mM	313	234	7.987	6.41	0.256	2.679	0	-0.674	0	false
02090:M15	2090	M15	Biomol4	BIOMOL	DL-349	Chloramphenicol	6.2 mM	324	251	7.099	6.773	0.634	0	0.401	-0.612	0.005	false
02090:M16	2090	M16	Biomol4	BIOMOL	DL-425	Indapamide	5.5 mM	365	248	10.411	7.258	2.065	0	0	-0.674	0	false
02090:M17	2090	M17	Biomol4	BIOMOL	DL-350	Chlormadinone acetate	4.5 mM	331	250	12.689	11.2	6.456	0	5.12	0.12	0.064	false
02090:M18	2090	M18	Biomol4	BIOMOL	DL-426	Itopride HCl	5.6 mM	319	258	9.091	5.814	0.111	0	0	-0.674	0	false
02090:M19	2090	M19	Biomol4	BIOMOL	DL-351	Chlorambucil	6.6 mM	324	240	19.753	7.083	8.594	1.466	0	-0.674	0	false
02090:M20	2090	M20	Biomol4	BIOMOL	DL-427	Itraconazole	2.8 mM	317	301	9.148	4.983	0.431	0	0	-0.674	0	false
02090:M21	2090	M21	Biomol4	BIOMOL	DL-352	Chlorpheniramine maleate	7.3 mM	302	269	24.172	21.933	22.17	0	20.231	2.464	0.251	false
02090:M22	2090	M22	Biomol4	BIOMOL	EI-288	Ketoprofen (s)	7.9 mM	335	266	9.552	6.391	0.845	0	0	-0.674	0	false
02090:N03	2090	N03	Biomol4	BIOMOL	DL-496	Roxatidine acetate HCl	5.7 mM	396	312	7.323	2.564	3.43	0	0	-0.674	0	false
02090:N04	2090	N04	Biomol4	BIOMOL	S-515	Megestrol acetate	5.2 mM	362	258	6.63	8.527	0.265	0	0	-0.674	0	false
02090:N05	2090	N05	Biomol4	BIOMOL	DL-497	Roxithromycin	2.4 mM	335	252	8.657	7.937	1.293	0	0.681	-0.569	0.008	false
02090:N06	2090	N06	Biomol4	BIOMOL	S-520	Melengestrol acetate	5 mM	333	253	10.21	3.162	0.955	0	0	-0.674	0	false
02090:N07	2090	N07	Biomol4	BIOMOL	DL-498	Rufloxacin	5.5 mM	308	320	9.416	5.313	0.01	0	0	-0.674	0	false
02090:N08	2090	N08	Biomol4	BIOMOL	S-650	Tamoxifen citrate	5.4 mM	347	259	34.006	44.402	44.952	0	33.948	4.592	0.421	false
02090:N09	2090	N09	Biomol4	BIOMOL	DL-499	Sarafloxacin HCl	5.2 mM	293	246	8.532	7.724	1.055	1.703	0	-0.674	0	false
02090:N10	2090	N10	Biomol4	BIOMOL	DL-532	Amprenavir	4 mM	297	244	12.458	7.377	3.606	1.444	0	-0.674	0	false
02090:N11	2090	N11	Biomol4	BIOMOL	DL-500	Scopolamine n-butylbromide	5.5 mM	314	245	8.917	4.082	1.229	0.455	0	-0.674	0	false
02090:N12	2090	N12	Biomol4	BIOMOL	DL-533	Aprepitant	3.7 mM	324	245	4.938	4.898	3.489	0.455	3.007	-0.208	0.037	false
02090:N13	2090	N13	Biomol4	BIOMOL	DL-501	Scopolamine HBr	6.6 mM	251	244	9.163	5.328	0.179	9.067	0	-0.674	0	false
02090:N14	2090	N14	Biomol4	BIOMOL	DL-534	Bosentan	3.6 mM	361	268	8.587	5.224	0.662	0	0	-0.674	0	false
02090:N15	2090	N15	Biomol4	BIOMOL	DL-502	Secnidazole	10.8 mM	343	260	6.997	11.538	2.641	0	0	-0.674	0	false
02090:N16	2090	N16	Biomol4	BIOMOL	DL-535	Efavirenz	6.3 mM	373	231	8.847	16.883	7.712	3.286	0	-0.674	0	false
02090:N17	2090	N17	Biomol4	BIOMOL	DL-503	Sibutramine HCl	7.1 mM	283	215	28.975	29.767	31.092	9.629	20.263	2.469	0.252	false
02090:N18	2090	N18	Biomol4	BIOMOL	DL-536	Taurocholic acid, sodium salt hydrate	3.9 mM	320	265	14.375	9.057	6.151	0	0.956	-0.526	0.012	false
02090:N19	2090	N19	Biomol4	BIOMOL	DL-149	Sparfloxacin	5.1 mM	319	229	7.524	8.734	1.046	3.691	0	-0.674	0	false
02090:N20	2090	N20	Biomol4	BIOMOL	SL-230	Miglustat	9.1 mM	326	256	4.601	8.594	1.133	0	0	-0.674	0	false
02090:N21	2090	N21	Biomol4	BIOMOL	DL-504	Spironolactone	4.8 mM	358	251	5.587	11.155	1.368	0	0	-0.674	0	false
02090:N22	2090	N22	Biomol4	BIOMOL	DL-104	Fulvestrant	3.3 mM	360	306	6.389	6.863	1.076	0	0.508	-0.596	0.006	false
02090:O03	2090	O03	Biomol4	BIOMOL	DL-353	Chloroquine phosphate	6.3 mM	336	266	27.381	24.06	25.948	0	22.957	2.887	0.285	false
02090:O04	2090	O04	Biomol4	BIOMOL	DL-429	Levamisole HCl	9.8 mM	362	282	6.63	12.057	2.744	0	0	-0.674	0	false
02090:O05	2090	O05	Biomol4	BIOMOL	T-115	Thalidomide	7.7 mM	366	251	6.557	7.57	0.46	0	0	-0.674	0	false
02090:O06	2090	O06	Biomol4	BIOMOL	DL-430	Levonorgestrel	6.4 mM	353	251	14.448	13.546	9.355	0	8.639	0.666	0.107	false
02090:O07	2090	O07	Biomol4	BIOMOL	DL-355	Ciprofloxacin	6 mM	317	266	7.571	7.143	0.038	0	0	-0.674	0	false
02090:O08	2090	O08	Biomol4	BIOMOL	DL-431	Levodopa	10.1 mM	361	283	6.371	7.42	0.697	0	0	-0.674	0	false
02090:O09	2090	O09	Biomol4	BIOMOL	AR-116	Citalopram	6.2 mM	338	279	37.574	33.333	39.718	0	35.934	4.9	0.446	false
02090:O10	2090	O10	Biomol4	BIOMOL	DL-432	Levofloxacin HCl	5.5 mM	330	258	9.697	6.977	1.359	0	0	-0.674	0	false
02090:O11	2090	O11	Biomol4	BIOMOL	DL-357	Clarithromycin	2.7 mM	345	264	6.377	7.955	0.318	0	0	-0.674	0	false
02090:O12	2090	O12	Biomol4	BIOMOL	DL-433	Leflunomide	7.4 mM	293	261	10.922	11.111	5.135	1.45	3.343	-0.156	0.042	false
02090:O13	2090	O13	Biomol4	BIOMOL	DL-358	Climbazole	6.8 mM	304	268	8.553	5.597	0.424	0	0	-0.674	0	false
02090:O14	2090	O14	Biomol4	BIOMOL	DL-434	Lisinopril	4.9 mM	327	228	16.514	12.281	9.938	3.893	1.98	-0.367	0.025	false
02090:O15	2090	O15	Biomol4	BIOMOL	DL-359	Clinafloxacin HCl	5.5 mM	370	261	7.838	6.897	0.021	0	0	-0.674	0	false
02090:O16	2090	O16	Biomol4	BIOMOL	DL-435	Lomefloxacin HCl	5.7 mM	348	289	8.621	5.882	0.176	0	0	-0.674	0	false
02090:O17	2090	O17	Biomol4	BIOMOL	DL-360	Clomiphene citrate	4.9 mM	321	239	54.829	49.372	63.268	1.668	56.819	8.14	0.705	false
02090:O18	2090	O18	Biomol4	BIOMOL	DL-436	Loratadine	5.2 mM	300	258	9	16.667	7.669	0.29	0	-0.674	0	false
02090:O19	2090	O19	Biomol4	BIOMOL	DL-361	Clopidol	10.4 mM	355	229	10.704	8.734	3.31	3.691	0	-0.674	0	false
02090:O20	2090	O20	Biomol4	BIOMOL	DL-437	Lorglumide	4.4 mM	333	244	5.405	8.607	0.551	0.657	0	-0.674	0	false
02090:O21	2090	O21	Biomol4	BIOMOL	AC-1290	Clopidogrel sulfate	6.2 mM	392	295	5.612	5.085	2.878	0	2.42	-0.299	0.03	false
02090:O22	2090	O22	Biomol4	BIOMOL	DL-438	Losartan potassium	4.3 mM	403	276	3.722	10.145	0.669	0	0	-0.674	0	false
02090:P03	2090	P03	Biomol4	BIOMOL	DL-505	Stanozolol	6.1 mM	326	231	4.601	6.494	2.608	3.286	0	-0.674	0	false
02090:P04	2090	P04	Biomol4	BIOMOL	DL-538	Methysergide	5.7 mM	355	208	7.887	5.288	1.115	7.937	0	-0.674	0	false
02090:P05	2090	P05	Biomol4	BIOMOL	DL-506	Streptomycin sulfate	3.4 mM	328	220	6.402	3.636	3.332	5.511	0	-0.674	0	false
02090:P06	2090	P06	Biomol4	BIOMOL	DL-107	Esmolol	6.8 mM	341	190	5.572	7.368	1.303	11.577	0	-0.674	0	false
02090:P07	2090	P07	Biomol4	BIOMOL	DL-507	Sulfadoxine	6.4 mM	251	209	6.375	8.612	0.143	16.144	0	-0.674	0	false
02090:P08	2090	P08	Biomol4	BIOMOL	DL-123	Pantothenic acid	9.1 mM	331	294	3.927	1.701	6.454	0	4.25	-0.015	0.053	false
02090:P09	2090	P09	Biomol4	BIOMOL	DL-508	Sulfadiazine	8 mM	331	289	5.438	3.806	3.9	0	2.32	-0.315	0.029	false
02090:P10	2090	P10	Biomol4	BIOMOL	DL-146	Phloridzin	4.6 mM	360	284	5.278	3.521	4.214	0	2.506	-0.286	0.031	false
02090:P11	2090	P11	Biomol4	BIOMOL	DL-509	Sulfadimethoxine	6.4 mM	297	241	10.101	2.49	1.505	2.051	0	-0.674	0	false
02090:P12	2090	P12	Biomol4	BIOMOL	DL-225	Phenylpropanolamine	13.2 mM	320	178	5.313	6.18	2.322	14.004	0	-0.674	0	false
02090:P13	2090	P13	Biomol4	BIOMOL	DL-510	Sulfasalazine	5 mM	275	203	9.091	5.419	0.166	13.381	0	-0.674	0	false
02090:P14	2090	P14	Biomol4	BIOMOL	DL-234	Succinylcholine	6.9 mM	321	221	5.607	8.597	0.414	5.308	0	-0.674	0	false
02090:P15	2090	P15	Biomol4	BIOMOL	DL-160	Tamsulosin HCl	4.9 mM	367	223	8.174	7.175	0.414	4.904	0	-0.674	0	false
02090:P16	2090	P16	Biomol4	BIOMOL	DL-195	Trifluperidol 2HCl	4.9 mM	314	246	26.433	26.016	26.647	0.253	26.334	3.411	0.327	false
02090:P17	2090	P17	Biomol4	BIOMOL	DL-511	Telmisartan	3.9 mM	353	259	4.533	3.089	5.048	0	3.647	-0.109	0.045	false
02090:P18	2090	P18	Biomol4	BIOMOL	DL-540	L-thyroxine [(3-[4-(4-hydroxy-3,5-diiodophenoxy)-3,5-diiodophenyl]-l-alanine]	2.6 mM	358	199	6.704	6.03	1.436	9.757	0	-0.674	0	false
02090:P19	2090	P19	Biomol4	BIOMOL	DL-512	Tenoxicam	5.9 mM	348	231	7.184	5.628	1.377	3.286	0	-0.674	0	false
02090:P20	2090	P20	Biomol4	BIOMOL	DL-136	Cyproheptadine	7 mM	331	231	55.287	33.766	52.633	3.286	28.289	3.714	0.351	false
02090:P21	2090	P21	Biomol4	BIOMOL	DL-513	Terazosin HCl	5.2 mM	328	280	4.573	6.429	2.674	0	0.73	-0.561	0.009	false
02090:P22	2090	P22	Biomol4	BIOMOL	DL-559	Benzydamine	6.5 mM	324	297	34.877	22.896	30.467	0	18.799	2.242	0.233	false
02091:A03	2091	A03	Microsource1	Microsource	200046	Griseofulvin	5.7 mM	248	260	2.823	3.462	0.009	0	0	-0.674	-0.001	false
02091:A04	2091	A04	Microsource1	Microsource	1500161	Carbinoxamine maleate	4.9 mM	215	218	23.721	14.679	23.136	0	15.66	2.953	0.198	false
02091:A05	2091	A05	Microsource1	Microsource	200331	Salsalate	7.7 mM	252	271	2.381	2.952	0.681	0	0	-0.674	-0.001	false
02091:A06	2091	A06	Microsource1	Microsource	1500162	Carisoprodol	7.7 mM	170	338	1.176	4.142	0.778	5.873	0	-0.674	-0.001	false
02091:A07	2091	A07	Microsource1	Microsource	210369	Gallic acid	11.8 mM	183	237	3.825	3.376	0.681	2.498	0	-0.674	-0.001	false
02091:A08	2091	A08	Microsource1	Microsource	1500163	Cefadroxil	5.5 mM	223	261	3.587	1.916	0.48	0	0	-0.674	-0.001	false
02091:A09	2091	A09	Microsource1	Microsource	211468	Danthron	8.3 mM	253	220	5.534	5	3.05	0	3.05	0.032	0.038	false
02091:A10	2091	A10	Microsource1	Microsource	1500164	Cefazolin sodium	4.2 mM	202	266	4.455	3.759	1.41	0	1.115	-0.416	0.013	false
02091:A11	2091	A11	Microsource1	Microsource	300024	Hydrocortisone	5.5 mM	196	158	3.571	1.266	0.93	10.139	0	-0.674	-0.001	false
02091:A12	2091	A12	Microsource1	Microsource	1500165	Cefotaxime sodium	4.2 mM	175	227	1.714	0.441	2.871	4.575	0	-0.674	-0.001	false
02091:A13	2091	A13	Microsource1	Microsource	300029	Desoxycorticosterone acetate	5.4 mM	178	223	6.18	6.726	4.695	3.796	0	-0.674	-0.001	false
02091:A14	2091	A14	Microsource1	Microsource	1500166	Cephalothin sodium	4.8 mM	248	256	1.613	2.734	1.401	0	0	-0.674	-0.001	false
02091:A15	2091	A15	Microsource1	Microsource	300034	Testosterone propionate	5.8 mM	236	225	40.254	33.778	48.337	0	45.465	9.855	0.578	false
02091:A16	2091	A16	Microsource1	Microsource	1500167	Cephapirin sodium	4.5 mM	252	273	2.381	2.93	0.696	0	0	-0.674	-0.001	false
02091:A17	2091	A17	Microsource1	Microsource	300548	Sparteine sulfate	6 mM	272	255	3.309	5.882	1.985	0	0	-0.674	-0.001	false
02091:A18	2091	A18	Microsource1	Microsource	1500168	Cephradine	5.7 mM	255	303	1.176	2.97	1.567	0	0	-0.674	-0.001	false
02091:A19	2091	A19	Microsource1	Microsource	300607	Rutoside (rutin)	3.3 mM	215	301	4.186	1.993	0.019	0	0	-0.674	-0.001	false
02091:A20	2091	A20	Microsource1	Microsource	1500169	Cetylpyridinium chloride	5.9 mM	15	54	80	98.148	121.357	82.483	10.253	1.7	0.13	false
02091:A21	2091	A21	Microsource1	Microsource	300618	Salicylanilide	9.4 mM	313	313	4.792	5.431	2.788	0	1.569	-0.311	0.019	false
02091:A22	2091	A22	Microsource1	Microsource	1500171	Chlorambucil	6.6 mM	243	234	2.469	1.709	1.453	0	0.876	-0.472	0.01	false
02091:B03	2091	B03	Microsource1	Microsource	1500263	Dopamine hydrochloride	10.5 mM	279	263	8.244	5.323	5.289	0	2.936	0.006	0.036	false
02091:B04	2091	B04	Microsource1	Microsource	1500375	Mechlorethamine	12.8 mM	231	207	7.792	8.213	6.899	0	5.603	0.623	0.07	false
02091:B05	2091	B05	Microsource1	Microsource	1500264	Doxepin hydrochloride	6.3 mM	220	280	82.273	73.571	106.49	0	105.639	23.792	1.343	true
02091:B06	2091	B06	Microsource1	Microsource	1500376	Meclizine hydrochloride	4.3 mM	292	347	8.219	8.646	7.509	0	6.161	0.752	0.077	false
02091:B07	2091	B07	Microsource1	Microsource	1500266	Doxycycline hydrochloride	4.2 mM	230	317	4.348	4.101	1.56	0	1.369	-0.357	0.017	false
02091:B08	2091	B08	Microsource1	Microsource	1500377	Meclofenamate sodium	6.3 mM	222	301	4.054	3.987	1.264	0	0.906	-0.465	0.011	false
02091:B09	2091	B09	Microsource1	Microsource	1500267	Doxylamine succinate	5.1 mM	234	287	2.137	2.439	1.209	0	0.647	-0.525	0.007	false
02091:B10	2091	B10	Microsource1	Microsource	1500379	Medroxyprogesterone acetate	5.2 mM	224	280	1.339	6.071	0.644	0	0	-0.674	-0.001	false
02091:B11	2091	B11	Microsource1	Microsource	1500268	Dyclonine hydrochloride	6.1 mM	218	282	5.963	4.61	3.107	0	2.246	-0.154	0.028	false
02091:B12	2091	B12	Microsource1	Microsource	1500380	Medrysone	5.8 mM	209	254	4.306	6.693	3.275	0	0.174	-0.634	0.001	false
02091:B13	2091	B13	Microsource1	Microsource	1500269	Dyphylline	7.9 mM	196	258	3.571	3.876	0.829	0	0.111	-0.649	0.001	false
02091:B14	2091	B14	Microsource1	Microsource	1500381	Megestrol acetate	5.2 mM	249	264	5.622	4.924	3.065	0	2.892	-0.005	0.036	false
02091:B15	2091	B15	Microsource1	Microsource	1500270	Trisodium ethylenediamine tetracetate	5.5 mM	202	300	4.455	5	2.246	0	1.168	-0.404	0.014	false
02091:B16	2091	B16	Microsource1	Microsource	1500382	Melphalan	6.6 mM	229	271	3.493	6.642	2.635	0	0	-0.674	-0.001	false
02091:B17	2091	B17	Microsource1	Microsource	1500272	Emetine	3.6 mM	221	220	83.71	78.636	110.975	0	107.659	24.26	1.369	true
02091:B18	2091	B18	Microsource1	Microsource	1500383	Mepenzolate bromide	4.8 mM	249	317	3.614	2.839	0.162	0	0	-0.674	-0.001	false
02091:B19	2091	B19	Microsource1	Microsource	1500276	Ergocalciferol	5 mM	226	326	3.982	3.374	0.797	0	0.549	-0.547	0.006	false
02091:B20	2091	B20	Microsource1	Microsource	1500387	Mercaptopurine	13.1 mM	229	294	5.677	2.721	1.621	0	0	-0.674	-0.001	false
02091:B21	2091	B21	Microsource1	Microsource	1500277	Ergonovine maleate	4.5 mM	267	310	10.487	2.581	5.114	0	0	-0.674	-0.001	false
02091:B22	2091	B22	Microsource1	Microsource	1500388	Mestranol	6.4 mM	282	421	41.135	14.014	35.675	0	10.05	1.653	0.127	false
02091:C03	2091	C03	Microsource1	Microsource	305025	Phenyl aminosalicylate	8.7 mM	316	312	10.759	7.372	8.546	0	5.944	0.702	0.075	false
02091:C04	2091	C04	Microsource1	Microsource	1500172	Chloramphenicol palmitate	3.6 mM	255	259	1.569	1.544	2.236	0	2.095	-0.189	0.026	false
02091:C05	2091	C05	Microsource1	Microsource	307023	Testosterone	6.9 mM	241	239	7.054	12.134	8.991	0	2.616	-0.069	0.032	false
02091:C06	2091	C06	Microsource1	Microsource	1500173	Chloramphenicol hemisuccinate	4.7 mM	210	316	2.857	1.266	1.463	0	0.006	-0.673	-0.001	false
02091:C07	2091	C07	Microsource1	Microsource	310006	Hydrastinine hydrochloride	8.2 mM	275	304	3.273	1.316	1.119	0	0	-0.674	-0.001	false
02091:C08	2091	C08	Microsource1	Microsource	1500174	Chloramphenicol	6.2 mM	237	266	3.797	3.008	0.412	0	0	-0.674	-0.001	false
02091:C09	2091	C09	Microsource1	Microsource	310035	Sanguinarine sulfate	4.7 mM	66	60	96.97	98.333	134.137	67.731	54.55	11.96	0.693	false
02091:C10	2091	C10	Microsource1	Microsource	1500175	Chlorcyclizine hydrochloride	5.9 mM	233	302	26.18	24.172	31.368	0	30.797	6.458	0.391	false
02091:C11	2091	C11	Microsource1	Microsource	310039	Alpha-tochopherol	4.6 mM	239	286	3.347	2.448	0.301	0	0	-0.674	-0.001	false
02091:C12	2091	C12	Microsource1	Microsource	1500177	Chlorhexidine	3.5 mM	272	291	4.412	3.436	1.16	0	0.551	-0.547	0.006	false
02091:C13	2091	C13	Microsource1	Microsource	310040	Alpha-tochopheryl acetate	4.2 mM	236	272	4.237	1.838	0.048	0	0	-0.674	-0.001	false
02091:C14	2091	C14	Microsource1	Microsource	1500178	Chlorocresol	14 mM	231	319	3.03	4.389	0.771	0	0	-0.674	-0.001	false
02091:C15	2091	C15	Microsource1	Microsource	310050	Quinine ethyl carbonate	5 mM	258	313	14.341	2.556	7.971	0	0	-0.674	-0.001	false
02091:C16	2091	C16	Microsource1	Microsource	1500179	Chloroquine diphosphate	3.9 mM	241	318	30.29	10.692	25.349	0	6.891	0.921	0.087	false
02091:C17	2091	C17	Microsource1	Microsource	330001	Dactinomycin	1.6 mM	125	165	27.2	30.909	36.668	25.926	3.735	0.19	0.047	false
02091:C18	2091	C18	Microsource1	Microsource	1500180	Chlorothiazide	6.8 mM	214	280	3.271	2.143	0.563	0	0	-0.674	-0.001	false
02091:C19	2091	C19	Microsource1	Microsource	330002	Mitomycin c	6 mM	156	190	26.282	14.737	25.085	11.572	3.54	0.145	0.044	false
02091:C20	2091	C20	Microsource1	Microsource	1500181	Chlorotrianisene	5.3 mM	295	299	5.763	4.348	2.781	0	1.83	-0.251	0.022	false
02091:C21	2091	C21	Microsource1	Microsource	330018	Dichlorvos	9.1 mM	281	362	7.117	8.011	6.26	0	4.512	0.37	0.057	false
02091:C22	2091	C22	Microsource1	Microsource	1500182	Chloroxylenol	12.8 mM	282	340	16.667	5.882	11.947	0	1.791	-0.26	0.022	false
02091:D03	2091	D03	Microsource1	Microsource	1500279	Erythromycin ethylsuccinate	2.3 mM	341	324	3.226	4.63	1.079	0	0	-0.674	-0.001	false
02091:D04	2091	D04	Microsource1	Microsource	1500390	Metaproterenol	9.5 mM	265	286	4.906	4.545	2.275	0	2.15	-0.176	0.026	false
02091:D05	2091	D05	Microsource1	Microsource	1500280	Erythromycin	2.7 mM	242	294	9.917	5.102	6.388	0	2.117	-0.184	0.026	false
02091:D06	2091	D06	Microsource1	Microsource	1500391	Methacholine chloride	10.2 mM	288	337	5.208	2.374	1.038	0	0	-0.674	-0.001	false
02091:D07	2091	D07	Microsource1	Microsource	1500282	Estradiol	7.3 mM	234	305	8.547	8.197	7.451	0	6.927	0.93	0.087	false
02091:D08	2091	D08	Microsource1	Microsource	1500394	Methenamine	14.3 mM	240	274	3.75	4.745	1.548	0	0.047	-0.664	0	false
02091:D09	2091	D09	Microsource1	Microsource	1500283	Estradiol cypionate	5 mM	251	265	0.797	13.585	5.302	0	0	-0.674	-0.001	false
02091:D10	2091	D10	Microsource1	Microsource	1500395	Methicillin sodium	5 mM	229	261	2.62	3.065	0.427	0	0	-0.674	-0.001	false
02091:D11	2091	D11	Microsource1	Microsource	1500284	Estradiol valerate	5.6 mM	154	202	24.026	39.604	40.16	10.026	10.33	1.718	0.131	false
02091:D12	2091	D12	Microsource1	Microsource	1500396	Methimazole	17.5 mM	219	246	1.826	2.846	1.167	0	0	-0.674	-0.001	false
02091:D13	2091	D13	Microsource1	Microsource	1500285	Estriol	6.9 mM	242	250	3.306	3.2	0.175	0	0	-0.674	-0.001	false
02091:D14	2091	D14	Microsource1	Microsource	1500397	Methocarbamol	8.3 mM	188	292	4.255	4.452	1.727	1.201	0	-0.674	-0.001	false
02091:D15	2091	D15	Microsource1	Microsource	1500286	Estrone	7.4 mM	270	273	3.333	5.495	1.742	0	0	-0.674	-0.001	false
02091:D16	2091	D16	Microsource1	Microsource	1500398	Methotrexate(+/-)	4.4 mM	194	263	6.186	5.323	3.754	0	3.459	0.127	0.043	false
02091:D17	2091	D17	Microsource1	Microsource	1500287	Ethacrynic acid	6.6 mM	243	305	3.292	6.885	2.649	0	0	-0.674	-0.001	false
02091:D18	2091	D18	Microsource1	Microsource	1500399	Methoxamine hydrochloride	8.1 mM	270	262	0.741	1.145	3.122	0	2.596	-0.073	0.032	false
02091:D19	2091	D19	Microsource1	Microsource	1500288	Ethambutol hydrochloride	7.2 mM	238	351	5.462	4.274	2.507	0	1.774	-0.264	0.022	false
02091:D20	2091	D20	Microsource1	Microsource	1500400	Methoxsalen	9.3 mM	280	315	1.786	5.714	0.736	0	0	-0.674	-0.001	false
02091:D21	2091	D21	Microsource1	Microsource	1500291	Ethinyl estradiol	6.7 mM	255	265	36.471	43.019	51.742	0	40.604	8.73	0.516	false
02091:D22	2091	D22	Microsource1	Microsource	1500401	Methscopolamine bromide	5 mM	324	293	4.012	4.778	1.766	0	0.49	-0.561	0.005	false
02091:E03	2091	E03	Microsource1	Microsource	330062	Temefos	4.3 mM	308	295	0.974	1.356	2.806	0	2.28	-0.147	0.028	false
02091:E04	2091	E04	Microsource1	Microsource	1500183	Chlorpheniramine (s) maleate	5.1 mM	247	266	14.17	13.91	15.495	0	14.271	2.631	0.181	false
02091:E05	2091	E05	Microsource1	Microsource	330071	Lindane	6.9 mM	268	258	2.239	3.876	0.165	0	0	-0.674	-0.001	false
02091:E06	2091	E06	Microsource1	Microsource	1500184	Chlorpromazine	6.3 mM	253	200	71.146	78	101.176	0	86	19.243	1.093	true
02091:E07	2091	E07	Microsource1	Microsource	330082	Mitotane	6.2 mM	248	284	11.694	24.648	20.884	0	5.3	0.553	0.067	false
02091:E08	2091	E08	Microsource1	Microsource	1500185	Chlorpropamide	7.2 mM	270	293	2.593	1.706	1.363	0	0.659	-0.522	0.007	false
02091:E09	2091	E09	Microsource1	Microsource	330086	Dibutyl phthalate	7.2 mM	238	298	2.101	2.013	1.523	0	1.395	-0.351	0.017	false
02091:E10	2091	E10	Microsource1	Microsource	1500186	Chlortetracycline hydrochloride	3.9 mM	225	239	2.667	3.766	0.08	0	0	-0.674	-0.001	false
02091:E11	2091	E11	Microsource1	Microsource	1300027	Ivermectin	2.3 mM	265	312	1.132	0.962	2.954	0	2.886	-0.006	0.036	false
02091:E12	2091	E12	Microsource1	Microsource	1500187	Chlorthalidone	5.9 mM	181	244	1.657	2.869	1.277	3.018	0	-0.674	-0.001	false
02091:E13	2091	E13	Microsource1	Microsource	1300037	Sodium nitroprusside	7.6 mM	244	230	1.639	1.304	2.345	0	2.149	-0.177	0.026	false
02091:E14	2091	E14	Microsource1	Microsource	1500188	Chlorzoxazone	11.8 mM	224	276	0.893	4.348	0.851	0	0	-0.674	-0.001	false
02091:E15	2091	E15	Microsource1	Microsource	1300038	Sodium oxybate	15.9 mM	271	300	1.107	2.667	1.824	0	0	-0.674	-0.001	false
02091:E16	2091	E16	Microsource1	Microsource	1500189	Ciclopirox olamine	7.5 mM	219	254	10.046	12.598	11.535	0	7.638	1.095	0.096	false
02091:E17	2091	E17	Microsource1	Microsource	1400151	Ethyl paraben	12 mM	266	292	3.759	2.055	0.258	0	0	-0.674	-0.001	false
02091:E18	2091	E18	Microsource1	Microsource	1500190	Cinoxacin	7.6 mM	266	316	3.759	1.582	0.576	0	0	-0.674	-0.001	false
02091:E19	2091	E19	Microsource1	Microsource	1400208	Coumarin	13.7 mM	293	304	1.365	4.605	0.325	0	0	-0.674	-0.001	false
02091:E20	2091	E20	Microsource1	Microsource	1500191	Clemastine	4.3 mM	233	285	33.906	31.93	42.357	0	40.926	8.804	0.52	false
02091:E21	2091	E21	Microsource1	Microsource	1600716	2,6-di-t-butyl-4-methylphenol	9.1 mM	266	277	19.173	16.606	21.043	0	20.249	4.015	0.257	false
02091:E22	2091	E22	Microsource1	Microsource	1500192	Clidinium bromide	4.6 mM	301	323	2.99	1.548	1.173	0	0	-0.674	-0.001	false
02091:F03	2091	F03	Microsource1	Microsource	1500292	Ethionamide	12 mM	277	355	4.693	4.507	2.091	0	1.796	-0.259	0.022	false
02091:F04	2091	F04	Microsource1	Microsource	1500403	Methyldopa	9.5 mM	261	322	2.299	7.764	2.5	0	0	-0.674	-0.001	false
02091:F05	2091	F05	Microsource1	Microsource	1500293	Ethopropazine hydrochloride	5.7 mM	239	254	51.883	39.37	60.778	0	52.466	11.477	0.667	false
02091:F06	2091	F06	Microsource1	Microsource	1500406	Methylprednisolone	5.3 mM	280	248	1.071	4.839	0.387	0	0	-0.674	-0.001	false
02091:F07	2091	F07	Microsource1	Microsource	1500295	Eucatropine hydrochloride	6.1 mM	250	266	0.8	3.383	1.57	0	0	-0.674	-0.001	false
02091:F08	2091	F08	Microsource1	Microsource	1500408	Methylthiouracil	14.1 mM	282	261	1.418	3.448	1.065	0	0	-0.674	-0.001	false
02091:F09	2091	F09	Microsource1	Microsource	1500296	Eugenol	12.2 mM	254	237	1.969	5.063	0.434	0	0	-0.674	-0.001	false
02091:F10	2091	F10	Microsource1	Microsource	1500410	Metoclopramide hydrochloride	5.9 mM	222	278	2.252	3.957	0.1	0	0	-0.674	-0.001	false
02091:F11	2091	F11	Microsource1	Microsource	1500299	Fludrocortisone acetate	4.7 mM	252	227	1.587	3.524	0.888	0	0	-0.674	-0.001	false
02091:F12	2091	F12	Microsource1	Microsource	1500411	Metoprolol tartrate	4.8 mM	223	222	3.139	3.604	0.323	0	0	-0.674	-0.001	false
02091:F13	2091	F13	Microsource1	Microsource	1500300	Flumethazone pivalate	4 mM	246	247	0.813	2.024	2.476	0	1.049	-0.432	0.012	false
02091:F14	2091	F14	Microsource1	Microsource	1500412	Metronidazole	11.7 mM	251	278	3.586	2.878	0.167	0	0	-0.674	-0.001	false
02091:F15	2091	F15	Microsource1	Microsource	1500302	Fluocinolone acetonide	4.4 mM	250	256	4.4	3.516	1.204	0	0.695	-0.514	0.008	false
02091:F16	2091	F16	Microsource1	Microsource	1500413	Miconazole nitrate	4.2 mM	254	290	3.543	5.862	2.146	0	0	-0.674	-0.001	false
02091:F17	2091	F17	Microsource1	Microsource	1500303	Fluocinonide	4 mM	254	269	3.15	5.576	1.66	0	0	-0.674	-0.001	false
02091:F18	2091	F18	Microsource1	Microsource	1500414	Minocycline hydrochloride	4 mM	259	318	3.475	2.516	0.16	0	0	-0.674	-0.001	false
02091:F19	2091	F19	Microsource1	Microsource	1500305	Fluorouracil	15.4 mM	222	248	2.703	2.016	1.072	0	0.601	-0.535	0.007	false
02091:F20	2091	F20	Microsource1	Microsource	1500415	Minoxidil	9.6 mM	269	290	4.089	2.414	0.23	0	0	-0.674	-0.001	false
02091:F21	2091	F21	Microsource1	Microsource	1500308	Flurbiprofen	8.2 mM	289	285	5.19	2.105	0.843	0	0	-0.674	-0.001	false
02091:F22	2091	F22	Microsource1	Microsource	1500404	Methylergonovine maleate	4.4 mM	338	299	4.438	1.672	0.01	0	0	-0.674	-0.001	false
02091:G03	2091	G03	Microsource1	Microsource	1500101	Acetaminophen	13.2 mM	324	341	1.852	4.399	0.101	0	0	-0.674	-0.001	false
02091:G04	2091	G04	Microsource1	Microsource	1500193	Clindamycin hydrochloride	4.3 mM	338	278	1.183	2.878	1.625	0	0	-0.674	-0.001	false
02091:G05	2091	G05	Microsource1	Microsource	1500102	Acetazolamide	9 mM	304	281	1.974	2.135	1.536	0	1.146	-0.409	0.014	false
02091:G06	2091	G06	Microsource1	Microsource	1500196	Clomiphene citrate	3.3 mM	295	248	9.831	9.274	9.135	0	8.701	1.341	0.11	false
02091:G07	2091	G07	Microsource1	Microsource	1500103	Acetohydroxamic acid	26.6 mM	247	321	0.81	0.312	3.633	0	3.168	0.059	0.039	false
02091:G08	2091	G08	Microsource1	Microsource	1500198	Clonidine hydrochloride	7.5 mM	246	302	1.22	2.649	1.752	0	0.04	-0.665	0	false
02091:G09	2091	G09	Microsource1	Microsource	1500104	Acetylcholine	11 mM	254	295	1.969	2.034	1.608	0	1.325	-0.368	0.016	false
02091:G10	2091	G10	Microsource1	Microsource	1500200	Clotrimazole	5.8 mM	206	268	0.971	5.224	0.202	0	0	-0.674	-0.001	false
02091:G11	2091	G11	Microsource1	Microsource	1500105	Acetylcysteine	12.3 mM	218	242	1.835	2.479	1.407	0	0.498	-0.559	0.005	false
02091:G12	2091	G12	Microsource1	Microsource	1500201	Cloxacillin sodium	4.4 mM	262	237	2.672	2.11	1.032	0	0.695	-0.513	0.008	false
02091:G13	2091	G13	Microsource1	Microsource	1500107	Adenosine	7.5 mM	262	273	1.908	1.099	2.283	0	1.59	-0.306	0.019	false
02091:G14	2091	G14	Microsource1	Microsource	1500202	Cloxyquin	11.1 mM	234	230	8.12	2.174	3.074	0	0	-0.674	-0.001	false
[truncated: 13,868 more rows]
