# Supplementary material for: Nanchangmycin regulates FYN, FAK and ERK to control the fibrotic activity of hepatic stellate cells
Source: bioRxiv preprint, doi:10.1101/2021.10.08.463221, version 1 (2021-10-09)
Supplement: Supplementary Table 7 [file 463221_file09.xlsx]

## Sheet: Neg
NAME	SIZE	ES	NES	NOM p-val	FDR q-val	FWER p-val
GO_EXTRACELLULAR_MATRIX_STRUCTURAL_CONSTITUENT	140	-0.742075	-2.79322	0	0	0
GO_COLLAGEN_CONTAINING_EXTRACELLULAR_MATRIX	344	-0.673261	-2.73878	0	0	0
GO_EXTRACELLULAR_MATRIX	438	-0.648975	-2.66757	0	0	0
GO_EXTRACELLULAR_STRUCTURE_ORGANIZATION	339	-0.653087	-2.64942	0	0	0
GO_CONTRACTILE_FIBER	204	-0.638618	-2.51056	0	0	0
GO_COLLAGEN_BINDING	66	-0.734709	-2.50201	0	0	0
GO_ACTIN_FILAMENT_BUNDLE	70	-0.733766	-2.4984	0	0	0
GO_BASEMENT_MEMBRANE	93	-0.697961	-2.49316	0	0	0
GO_MYOFIBRIL_ASSEMBLY	57	-0.753988	-2.49001	0	0	0
GO_GLYCOSAMINOGLYCAN_BINDING	172	-0.646596	-2.48652	0	0	0
GO_ACTOMYOSIN	73	-0.721332	-2.48142	0	0	0
GO_EXTRACELLULAR_MATRIX_BINDING	52	-0.749784	-2.47914	0	0	0
GO_CELL_SUBSTRATE_ADHESION	327	-0.608882	-2.46188	0	0	0
GO_COLLAGEN_TRIMER	66	-0.721225	-2.44867	0	0	0
GO_CELLULAR_COMPONENT_ASSEMBLY_INVOLVED_IN_MORPHOGENESIS	94	-0.677568	-2.43585	0	0	0
GO_I_BAND	129	-0.65806	-2.43338	0	0	0
GO_ACTIN_BINDING	388	-0.589337	-2.42428	0	0	0
GO_INTEGRIN_MEDIATED_SIGNALING_PATHWAY	102	-0.663394	-2.42397	0	0	0
GO_GROWTH_FACTOR_BINDING	118	-0.655647	-2.41441	0	0	0
HP_LEFT_VENTRICULAR_DYSFUNCTION	65	-0.717145	-2.41344	0	0	0
HP_ABNORMAL_CARDIAC_VENTRICULAR_FUNCTION	78	-0.692761	-2.41096	0	0	0
GO_SARCOMERE_ORGANIZATION	38	-0.768247	-2.3873	0	0	0
GO_COLLAGEN_FIBRIL_ORGANIZATION	51	-0.726487	-2.37815	0	0	0
HP_STROKE	122	-0.636456	-2.37144	0	0	0
GO_MUSCLE_CELL_DEVELOPMENT	151	-0.618117	-2.36372	0	0	0
GO_CELL_MATRIX_ADHESION	206	-0.599543	-2.36323	0	0	0
HP_GASTROINTESTINAL_DYSMOTILITY	68	-0.690878	-2.36143	0	0	0
GO_ACTIN_CYTOSKELETON	450	-0.578655	-2.3603	0	0	0
GO_REGULATION_OF_CELL_SUBSTRATE_ADHESION	191	-0.604328	-2.3439	0	0	0
GO_CELL_SUBSTRATE_JUNCTION	414	-0.572997	-2.33586	0	0	0
HP_ABNORMALITY_OF_BLADDER_MORPHOLOGY	42	-0.734503	-2.33279	0	0	0
HP_LIPOATROPHY	72	-0.674952	-2.33122	0	0	0
GO_ENDOPLASMIC_RETICULUM_LUMEN	266	-0.580859	-2.33068	0	0	0
GO_RENAL_SYSTEM_VASCULATURE_DEVELOPMENT	26	-0.819605	-2.32666	0	0	0
GO_HEPARIN_BINDING	123	-0.624757	-2.31701	0	0	0
HP_TRANSIENT_ISCHEMIC_ATTACK	42	-0.722979	-2.31568	0	0	0
HP_DILATATION_OF_THE_CEREBRAL_ARTERY	33	-0.768345	-2.3068	0	0	0
HP_SUBARACHNOID_HEMORRHAGE	28	-0.79658	-2.30239	0	0	0
GO_ACTOMYOSIN_STRUCTURE_ORGANIZATION	180	-0.593428	-2.29716	0	0	0
HP_SLENDER_FINGER	112	-0.624614	-2.29082	0	0	0
HP_BRUISING_SUSCEPTIBILITY	116	-0.613885	-2.28749	0	0	0
HP_OSTEOARTHRITIS	49	-0.703407	-2.28288	0	0	0
GO_ADHERENS_JUNCTION	156	-0.594162	-2.28268	0	0	0
GO_ENDOTHELIAL_CELL_MIGRATION	202	-0.580496	-2.27399	0	0	0
GO_EXTRACELLULAR_MATRIX_STRUCTURAL_CONSTITUENT_CONFERRING_TENSILE_STRENGTH	37	-0.73973	-2.27392	0	0	0
HP_MITOCHONDRIAL_RESPIRATORY_CHAIN_DEFECTS	18	-0.864276	-2.27344	0	0	0
GO_AORTA_DEVELOPMENT	53	-0.688584	-2.26828	0	0	0
HP_HYDROURETER	57	-0.689766	-2.26557	0	0	0
HP_BLURRED_VISION	30	-0.770145	-2.26354	0	0	0
GO_STRIATED_MUSCLE_CELL_DIFFERENTIATION	244	-0.568485	-2.26211	0	0	0
GO_TRANSMEMBRANE_RECEPTOR_PROTEIN_TYROSINE_KINASE_ACTIVITY	55	-0.689815	-2.26189	0	0	0
GO_BLOOD_VESSEL_MORPHOGENESIS	538	-0.544715	-2.26074	0	0	0
HP_ABNORMAL_PERISTALSIS	16	-0.875352	-2.25954	0	0	0
GO_PROTEIN_COMPLEX_INVOLVED_IN_CELL_ADHESION	34	-0.743663	-2.25711	0	0	0
GO_SARCOLEMMA	123	-0.609326	-2.25655	0	0	0
GO_ACTIN_FILAMENT_BASED_PROCESS	723	-0.53642	-2.25478	0	0	0
GO_ACTIN_FILAMENT_BINDING	188	-0.577595	-2.25429	0	0	0
HP_DILATED_CARDIOMYOPATHY	142	-0.599103	-2.25244	0	0	0
GO_NEGATIVE_REGULATION_OF_CELL_SUBSTRATE_ADHESION	58	-0.676777	-2.2519	0	0	0
GO_SUBSTRATE_ADHESION_DEPENDENT_CELL_SPREADING	99	-0.624666	-2.2485	0	0	0
GO_CARDIAC_CELL_DEVELOPMENT	71	-0.655866	-2.24779	0	0	0
HP_CARDIAC_CONDUCTION_ABNORMALITY	110	-0.608041	-2.24734	0	0	0
GO_VASCULATURE_DEVELOPMENT	644	-0.539125	-2.24566	0	0	0
HP_ISCHEMIC_STROKE	22	-0.819038	-2.24261	0	0	0
GO_GOLGI_LUMEN	70	-0.650335	-2.23998	0	0	0
GO_MUSCLE_CONTRACTION	293	-0.558026	-2.23831	0	0	0
GO_MYELOID_LEUKOCYTE_MIGRATION	160	-0.58072	-2.23677	0	0	0
GO_MUSCLE_CELL_PROLIFERATION	179	-0.583711	-2.23518	0	0	0
GO_MESENCHYME_DEVELOPMENT	254	-0.557126	-2.23513	0	0	0
GO_REGULATION_OF_CHEMOTAXIS	183	-0.575572	-2.23443	0	0	0
GO_INTEGRIN_BINDING	129	-0.595229	-2.22898	0	0	0
GO_SUPRAMOLECULAR_FIBER_ORGANIZATION	650	-0.535433	-2.2234	0	0	0
GO_TISSUE_MIGRATION	281	-0.554537	-2.22104	0	0	0
HP_RETINAL_VASCULAR_TORTUOSITY	40	-0.709354	-2.21711	0	0	0
GO_ARTERY_DEVELOPMENT	85	-0.627213	-2.21347	0	0	0
HP_ABNORMAL_AORTIC_VALVE_CUSP_MORPHOLOGY	72	-0.64906	-2.21268	0	0	0
HP_RETINAL_TELANGIECTASIA	19	-0.83504	-2.21199	0	0	0
GO_ANCHORING_JUNCTION	757	-0.525427	-2.20722	0	1.3814e-05	0.001
GO_AMEBOIDAL_TYPE_CELL_MIGRATION	376	-0.536668	-2.20696	0	1.36391e-05	0.001
HP_FOCAL_SEGMENTAL_GLOMERULOSCLEROSIS	44	-0.700142	-2.20596	0	1.34686e-05	0.001
GO_CELL_ADHESION_MEDIATED_BY_INTEGRIN	63	-0.656329	-2.20532	0	1.33023e-05	0.001
HP_ASCENDING_AORTIC_DISSECTION	19	-0.833117	-2.20493	0	1.31401e-05	0.001
GO_REGULATION_OF_LEUKOCYTE_CHEMOTAXIS	95	-0.609548	-2.20401	0	1.29818e-05	0.001
GO_CONDENSED_CHROMOSOME_CENTROMERIC_REGION	116	-0.603021	-2.20381	0	1.28273e-05	0.001
GO_STRUCTURAL_CONSTITUENT_OF_MUSCLE	33	-0.735845	-2.20375	0	1.26763e-05	0.001
GO_TRANSMEMBRANE_RECEPTOR_PROTEIN_KINASE_ACTIVITY	73	-0.637781	-2.19838	0	2.51132e-05	0.002
GO_ODONTOGENESIS	105	-0.601005	-2.19764	0	2.48245e-05	0.002
GO_SMOOTH_MUSCLE_TISSUE_DEVELOPMENT	21	-0.792163	-2.19753	0	2.45424e-05	0.002
GO_ATTACHMENT_OF_SPINDLE_MICROTUBULES_TO_KINETOCHORE	34	-0.730972	-2.19661	0	2.42667e-05	0.002
GO_MUSCLE_STRUCTURE_DEVELOPMENT	571	-0.525214	-2.19611	0	2.3997e-05	0.002
HP_ABNORMALITY_OF_BLOOD_VOLUME_HOMEOSTASIS	26	-0.77166	-2.19608	0	2.37333e-05	0.002
HP_ABNORMAL_MENINGEAL_MORPHOLOGY	92	-0.612121	-2.19565	0	2.34753e-05	0.002
GO_REGULATION_OF_MUSCLE_CONTRACTION	136	-0.584442	-2.19354	0	2.32229e-05	0.002
GO_NEGATIVE_REGULATION_OF_CHEMOTAXIS	50	-0.681972	-2.1934	0	2.29759e-05	0.002
GO_GLOMERULUS_DEVELOPMENT	58	-0.657641	-2.19253	0	2.2734e-05	0.002
HP_AORTIC_ROOT_ANEURYSM	43	-0.689599	-2.19069	0	3.37242e-05	0.003
GO_FIBRONECTIN_BINDING	22	-0.801018	-2.18988	0	3.33766e-05	0.003
GO_POSITIVE_REGULATION_OF_CELL_SUBSTRATE_ADHESION	109	-0.595771	-2.18829	0	3.3036e-05	0.003
GO_VASCULOGENESIS	76	-0.629209	-2.18675	0	3.27023e-05	0.003
HP_ABNORMAL_SPINAL_MENINGEAL_MORPHOLOGY	17	-0.858485	-2.18525	0	4.31061e-05	0.004
GO_POSITIVE_REGULATION_OF_EPITHELIAL_TO_MESENCHYMAL_TRANSITION	44	-0.68955	-2.1849	0	4.26793e-05	0.004
GO_REGULATION_OF_LEUKOCYTE_MIGRATION	165	-0.571724	-2.18364	0	4.22609e-05	0.004
GO_CARDIOCYTE_DIFFERENTIATION	127	-0.592889	-2.18083	0	5.23727e-05	0.005
GO_CIRCULATORY_SYSTEM_DEVELOPMENT	967	-0.512388	-2.17979	0	5.18692e-05	0.005
GO_CENTROMERE_COMPLEX_ASSEMBLY	40	-0.690556	-2.17864	0	5.13752e-05	0.005
HP_DESCENDING_THORACIC_AORTA_ANEURYSM	15	-0.853869	-2.17833	0	5.08905e-05	0.005
GO_MUSCLE_CELL_DIFFERENTIATION	323	-0.538394	-2.17776	0	5.04149e-05	0.005
GO_LAMININ_BINDING	28	-0.740384	-2.17761	0	4.99481e-05	0.005
HP_ABNORMAL_SUBARACHNOID_SPACE_MORPHOLOGY	78	-0.625767	-2.17656	0	4.94898e-05	0.005
GO_STRUCTURAL_MOLECULE_ACTIVITY	554	-0.522999	-2.17646	0	4.90399e-05	0.005
GO_CONNECTIVE_TISSUE_DEVELOPMENT	227	-0.544699	-2.17626	0	4.85981e-05	0.005
HP_SUPRAVENTRICULAR_ARRHYTHMIA	92	-0.60971	-2.17564	0	4.81642e-05	0.005
GO_EXTRACELLULAR_MATRIX_ASSEMBLY	38	-0.720127	-2.17506	0	4.7738e-05	0.005
GO_CARDIAC_MUSCLE_TISSUE_DEVELOPMENT	189	-0.560236	-2.17315	0	4.73192e-05	0.005
GO_MONONUCLEAR_CELL_MIGRATION	60	-0.648367	-2.17013	0	4.69078e-05	0.005
GO_REGULATION_OF_ENDOTHELIAL_CELL_MIGRATION	158	-0.577323	-2.17008	0	4.65034e-05	0.005
GO_REGULATION_OF_VASCULATURE_DEVELOPMENT	301	-0.536673	-2.16922	0	4.61059e-05	0.005
GO_KINETOCHORE	131	-0.57715	-2.16876	0	4.57152e-05	0.005
GO_NEGATIVE_CHEMOTAXIS	43	-0.685364	-2.16824	0	5.43346e-05	0.006
HP_CENTROCECAL_SCOTOMA	12	-0.908078	-2.16793	0	5.38818e-05	0.006
GO_BODY_FLUID_SECRETION	74	-0.625733	-2.16748	0	5.34365e-05	0.006
HP_VENTRICULAR_HYPERTROPHY	114	-0.591116	-2.16671	0	5.29985e-05	0.006
GO_SMOOTH_MUSCLE_CELL_PROLIFERATION	126	-0.585941	-2.16641	0	5.25676e-05	0.006
GO_MUSCLE_SYSTEM_PROCESS	372	-0.532982	-2.16507	0	5.21436e-05	0.006
GO_CARTILAGE_DEVELOPMENT	169	-0.568356	-2.16182	0	6.03293e-05	0.007
HP_LIPODYSTROPHY	98	-0.605175	-2.16173	0	5.98505e-05	0.007
GO_HYALURONIC_ACID_BINDING	17	-0.831848	-2.16096	0	5.93793e-05	0.007
GO_NEGATIVE_REGULATION_OF_COAGULATION	42	-0.687465	-2.16095	0	5.89154e-05	0.007
GO_REGULATION_OF_ACTIN_FILAMENT_BASED_PROCESS	361	-0.526889	-2.16061	0	5.84587e-05	0.007
GO_MACROPHAGE_MIGRATION	45	-0.673851	-2.15783	0	6.6143e-05	0.008
GO_FILOPODIUM	99	-0.603986	-2.15742	0	6.56381e-05	0.008
GO_REGULATION_OF_CALCIUM_ION_TRANSMEMBRANE_TRANSPORTER_ACTIVITY	78	-0.615361	-2.15685	0	6.51408e-05	0.008
GO_AMINOGLYCAN_BIOSYNTHETIC_PROCESS	106	-0.600124	-2.15629	0	6.4651e-05	0.008
GO_ANATOMICAL_STRUCTURE_FORMATION_INVOLVED_IN_MORPHOGENESIS	951	-0.507979	-2.154	0	7.21925e-05	0.009
HP_AORTIC_DISSECTION	28	-0.741952	-2.15071	0	7.16577e-05	0.009
HP_MITOCHONDRIAL_INHERITANCE	39	-0.701815	-2.14978	0	7.11308e-05	0.009
HP_IMPAIRED_VISUOSPATIAL_CONSTRUCTIVE_COGNITION	27	-0.751657	-2.14857	0	7.06116e-05	0.009
GO_ACTIN_FILAMENT_ORGANIZATION	396	-0.523101	-2.14536	0	7.00999e-05	0.009
GO_REGULATION_OF_CELL_SHAPE	142	-0.563507	-2.14513	0	6.95956e-05	0.009
GO_REGULATION_OF_EPITHELIAL_CELL_MIGRATION	214	-0.547665	-2.14195	0	7.68244e-05	0.01
GO_MESENCHYMAL_CELL_DIFFERENTIATION	204	-0.549309	-2.14138	0	7.62796e-05	0.01
HP_BASAL_GANGLIA_CALCIFICATION	38	-0.691523	-2.14102	0	7.57424e-05	0.01
GO_POSITIVE_REGULATION_OF_CALCIUM_ION_TRANSPORT	94	-0.600974	-2.13916	0	7.52127e-05	0.01
GO_CORECEPTOR_ACTIVITY	35	-0.710129	-2.13879	0	7.46904e-05	0.01
HP_THORACIC_AORTIC_ANEURYSM	71	-0.619839	-2.13869	0	7.41753e-05	0.01
GO_VASCULAR_ENDOTHELIAL_GROWTH_FACTOR_RECEPTOR_SIGNALING_PATHWAY	86	-0.615122	-2.13718	0	7.36672e-05	0.01
GO_ARTERY_MORPHOGENESIS	58	-0.650734	-2.13445	0	9.5107e-05	0.013
GO_ACTIN_MEDIATED_CELL_CONTRACTION	101	-0.579603	-2.13358	0	0.000101696	0.014
GO_MUSCLE_FILAMENT_SLIDING	27	-0.740019	-2.13169	0	0.000115371	0.016
GO_CARDIAC_MUSCLE_CELL_DIFFERENTIATION	101	-0.595676	-2.13134	0	0.000114602	0.016
GO_REGULATION_OF_CELLULAR_RESPONSE_TO_GROWTH_FACTOR_STIMULUS	251	-0.536401	-2.13081	0	0.000120909	0.017
GO_LAMELLIPODIUM	193	-0.545739	-2.13036	0	0.000120113	0.017
GO_CYTOKINE_BINDING	107	-0.584429	-2.13003	0	0.000119328	0.017
GO_POSITIVE_REGULATION_OF_CELLULAR_COMPONENT_MOVEMENT	503	-0.516558	-2.12879	0	0.000118553	0.017
GO_RENAL_SYSTEM_PROCESS	105	-0.592515	-2.12762	0	0.000124694	0.018
HP_PNEUMOTHORAX	32	-0.723281	-2.12753	0	0.000130806	0.019
HP_PROGRESSIVE_EXTERNAL_OPHTHALMOPLEGIA	34	-0.702292	-2.1245	0	0.000129972	0.019
GO_REGULATION_OF_CELL_ADHESION	602	-0.50972	-2.12411	0	0.00012915	0.019
GO_CALMODULIN_BINDING	174	-0.546414	-2.12287	0	0.000128337	0.019
HP_LEFT_VENTRICULAR_HYPERTROPHY	80	-0.610449	-2.11942	0	0.000134255	0.02
HP_VENTRICULAR_ARRHYTHMIA	103	-0.59075	-2.11869	0	0.000133422	0.02
GO_POSITIVE_REGULATION_OF_ENDOTHELIAL_CELL_MIGRATION	101	-0.586846	-2.11816	0	0.000132598	0.02
GO_RESPONSE_TO_TYPE_I_INTERFERON	82	-0.60054	-2.11761	0	0.000131784	0.02
GO_REGULATION_OF_SYSTEM_PROCESS	483	-0.510589	-2.11603	0	0.000150663	0.023
HP_ABNORMAL_CAROTID_ARTERY_MORPHOLOGY	60	-0.622698	-2.11457	0	0.000156239	0.024
GO_SULFUR_COMPOUND_BINDING	209	-0.542476	-2.11231	0	0.000161727	0.025
GO_POSITIVE_REGULATION_OF_EPITHELIAL_CELL_MIGRATION	139	-0.564361	-2.11216	0	0.000160759	0.025
GO_BLOOD_MICROPARTICLE	86	-0.59506	-2.11206	0	0.000159802	0.025
GO_VOLTAGE_GATED_CATION_CHANNEL_ACTIVITY	105	-0.574929	-2.11177	0	0.000165252	0.026
GO_MUSCLE_TISSUE_DEVELOPMENT	338	-0.522981	-2.11155	0	0.00016428	0.026
GO_MUSCLE_ORGAN_DEVELOPMENT	339	-0.522147	-2.1102	0	0.000175808	0.028
GO_CIRCULATORY_SYSTEM_PROCESS	462	-0.509496	-2.10882	0	0.000174786	0.028
GO_REGULATION_OF_EPITHELIAL_TO_MESENCHYMAL_TRANSITION	84	-0.597206	-2.10632	0	0.00017993	0.029
GO_GLIOGENESIS	248	-0.525164	-2.10522	0	0.000185027	0.03
GO_REGULATION_OF_CHONDROCYTE_DIFFERENTIATION	48	-0.657964	-2.10437	0	0.00018397	0.03
GO_POSITIVE_REGULATION_OF_VASCULATURE_DEVELOPMENT	173	-0.548886	-2.10339	0	0.00018904	0.031
GO_REGULATION_OF_COAGULATION	70	-0.611234	-2.1032	0	0.000187972	0.031
GO_POSITIVE_REGULATION_OF_EPITHELIAL_CELL_APOPTOTIC_PROCESS	28	-0.736684	-2.10264	0	0.000186916	0.031
GO_ENDODERMAL_CELL_DIFFERENTIATION	40	-0.66692	-2.10256	0	0.000185872	0.031
GO_NEGATIVE_REGULATION_OF_CELLULAR_COMPONENT_MOVEMENT	282	-0.521198	-2.10195	0	0.000184839	0.031
GO_REGULATION_OF_BLOOD_CIRCULATION	242	-0.531858	-2.1019	0	0.000183818	0.031
GO_CELL_SURFACE	653	-0.504462	-2.10171	0	0.000182808	0.031
GO_CELL_CELL_JUNCTION	426	-0.510288	-2.10141	0	0.000181809	0.031
GO_VASCULAR_ENDOTHELIAL_GROWTH_FACTOR_SIGNALING_PATHWAY	38	-0.677166	-2.09878	0	0.000180821	0.031
GO_HEART_PROCESS	239	-0.530063	-2.09802	0	0.000179844	0.031
GO_ACTIN_FILAMENT_BASED_MOVEMENT	130	-0.558549	-2.09802	0	0.000178877	0.031
GO_SMOOTH_MUSCLE_CONTRACTION	86	-0.594293	-2.09755	0	0.000183667	0.032
GO_NEGATIVE_REGULATION_OF_CARTILAGE_DEVELOPMENT	27	-0.734246	-2.09266	0	0.000216997	0.038
GO_REGULATION_OF_SUBSTRATE_ADHESION_DEPENDENT_CELL_SPREADING	48	-0.647482	-2.09197	0	0.000215849	0.038
HP_ABNORMALITY_OF_THE_CEREBRAL_VASCULATURE	260	-0.524088	-2.0898	0	0.000226035	0.04
GO_CHONDROCYTE_DIFFERENTIATION	98	-0.587455	-2.08937	0	0.000224852	0.04
GO_REGULATION_OF_URINE_VOLUME	18	-0.776636	-2.08901	0	0.000229271	0.041
GO_SEMAPHORIN_PLEXIN_SIGNALING_PATHWAY	39	-0.66659	-2.0883	0	0.000239094	0.043
GO_REGULATION_OF_MACROPHAGE_MIGRATION	35	-0.690564	-2.08807	0	0.000243387	0.044
HP_INTESTINAL_PSEUDO_OBSTRUCTION	28	-0.727855	-2.08749	0	0.000247655	0.045
GO_REGULATION_OF_CARTILAGE_DEVELOPMENT	65	-0.619181	-2.08727	0	0.000246392	0.045
GO_FIBRILLAR_COLLAGEN_TRIMER	12	-0.865376	-2.08665	0	0.000245141	0.045
GO_REGULATION_OF_CARDIAC_MUSCLE_TISSUE_DEVELOPMENT	79	-0.5975	-2.08627	0	0.000243903	0.045
GO_NEURON_PROJECTION_EXTENSION_INVOLVED_IN_NEURON_PROJECTION_GUIDANCE	34	-0.699572	-2.08376	0	0.000253487	0.047
GO_ACTIN_FILAMENT_BUNDLE_ORGANIZATION	149	-0.548935	-2.08174	0	0.000263049	0.049
GO_ENDOCRINE_PROCESS	64	-0.609212	-2.08171	0	0.00026174	0.049
GO_NEGATIVE_REGULATION_OF_DEVELOPMENTAL_PROCESS	815	-0.495087	-2.08077	0	0.000260444	0.049
HP_ABNORMAL_CEREBRAL_ARTERY_MORPHOLOGY	111	-0.563856	-2.08003	0	0.000259161	0.049
GO_ACTININ_BINDING	32	-0.698561	-2.07842	0	0.000263147	0.05
GO_RENAL_FILTRATION	21	-0.778853	-2.07724	0	0.0002775	0.052
GO_MUSCLE_CELL_MIGRATION	75	-0.596464	-2.0767	0	0.000281379	0.053
HP_ABNORMAL_LEFT_VENTRICLE_MORPHOLOGY	98	-0.574166	-2.07563	0	0.000285231	0.054
GO_NEGATIVE_REGULATION_OF_VASCULATURE_DEVELOPMENT	119	-0.564293	-2.07141	0	0.000289029	0.055
GO_PLATELET_ALPHA_GRANULE	76	-0.59907	-2.07041	0	0.000292758	0.056
HP_ATRIAL_ARRHYTHMIA	64	-0.614448	-2.06994	0	0.000291364	0.056
GO_EPITHELIAL_TO_MESENCHYMAL_TRANSITION	135	-0.549006	-2.069	0	0.000300239	0.058
GO_ETHANOL_METABOLIC_PROCESS	17	-0.787684	-2.06847	0	0.000303896	0.059
GO_HEART_DEVELOPMENT	510	-0.499871	-2.06831	0	0.00030247	0.059
GO_REGULATION_OF_VOLTAGE_GATED_CALCIUM_CHANNEL_ACTIVITY	32	-0.694451	-2.06792	0	0.000301056	0.059
GO_SUPRAMOLECULAR_POLYMER	781	-0.491555	-2.06724	0	0.000304646	0.06
GO_COMPLEX_OF_COLLAGEN_TRIMERS	20	-0.767049	-2.06723	0	0.000303235	0.06
GO_REGULATION_OF_CELLULAR_COMPONENT_MOVEMENT	907	-0.488627	-2.0666	0	0.000306782	0.061
GO_NEGATIVE_REGULATION_OF_CELL_DIFFERENTIATION	596	-0.49551	-2.06591	0	0.000310236	0.062
GO_AMINOGLYCAN_CATABOLIC_PROCESS	55	-0.628405	-2.06577	0	0.000313717	0.063
GO_CELL_JUNCTION_ASSEMBLY	373	-0.506652	-2.06343	0	0.000326931	0.066
HP_ABNORMAL_ATRIOVENTRICULAR_VALVE_MORPHOLOGY	116	-0.557614	-2.05961	0	0.000364311	0.073
GO_REGULATION_OF_MUSCLE_SYSTEM_PROCESS	198	-0.52615	-2.05936	0	0.000367547	0.074
GO_NEGATIVE_REGULATION_OF_BONE_MINERALIZATION	13	-0.839043	-2.05805	0	0.000380296	0.076
GO_POSITIVE_REGULATION_OF_CALCIUM_ION_TRANSMEMBRANE_TRANSPORT	57	-0.624047	-2.05782	0	0.000383328	0.077
GO_POSITIVE_REGULATION_OF_LEUKOCYTE_MIGRATION	113	-0.56288	-2.05767	0	0.000386372	0.078
GO_POSITIVE_REGULATION_OF_CHEMOTAXIS	117	-0.55493	-2.05579	0	0.000394106	0.08
GO_RECEPTOR_COMPLEX	324	-0.504083	-2.05522	0	0.000397074	0.081
GO_LEUKOCYTE_MIGRATION	361	-0.503753	-2.05485	0	0.000395333	0.081
HP_PERIPHERAL_ARTERIAL_STENOSIS	25	-0.729116	-2.05458	0	0.000393607	0.081
GO_NEGATIVE_REGULATION_OF_CHONDROCYTE_DIFFERENTIATION	21	-0.73963	-2.05185	0	0.000419915	0.087
GO_TRANSFORMING_GROWTH_FACTOR_BETA_BINDING	22	-0.740866	-2.05151	0	0.000422729	0.088
GO_REGULATION_OF_CELL_MATRIX_ADHESION	109	-0.557564	-2.05054	0	0.000420907	0.088
GO_NEGATIVE_REGULATION_OF_CALCIUM_ION_TRANSMEMBRANE_TRANSPORT	32	-0.692119	-2.05043	0	0.0004191	0.088
GO_GLIAL_CELL_MIGRATION	43	-0.649081	-2.05033	0	0.000417309	0.088
GO_REGULATION_OF_CATION_CHANNEL_ACTIVITY	143	-0.53989	-2.04969	0	0.000420107	0.089
GO_TUBE_MORPHOGENESIS	753	-0.488463	-2.04834	0	0.000422858	0.09
GO_CELL_ADHESION_MOLECULE_BINDING	489	-0.495453	-2.04786	0	0.000430112	0.091
GO_REGULATION_OF_SYSTEMIC_ARTERIAL_BLOOD_PRESSURE	64	-0.602083	-2.04624	0	0.000441861	0.094
GO_MITOTIC_SISTER_CHROMATID_SEGREGATION	158	-0.533194	-2.04602	0	0.000440012	0.094
GO_SMOOTH_MUSCLE_CELL_MIGRATION	63	-0.609051	-2.04585	0	0.000438179	0.094
GO_RESPONSE_TO_MECHANICAL_STIMULUS	187	-0.526671	-2.04486	0	0.000445232	0.096
GO_WOUND_HEALING	424	-0.49967	-2.0448	0	0.000443392	0.096
GO_CELLULAR_EXTRAVASATION	56	-0.624851	-2.04467	0	0.000441568	0.096
GO_NEGATIVE_REGULATION_OF_CELL_ADHESION	232	-0.52165	-2.04438	0	0.00044414	0.097
HP_VENTRICULAR_PREEXCITATION	31	-0.696935	-2.04386	0	0.000446701	0.098
HP_AORTIC_REGURGITATION	70	-0.599224	-2.04373	0	0.000449251	0.099
GO_T_TUBULE	51	-0.628	-2.04312	0	0.000447432	0.099
GO_SEMAPHORIN_RECEPTOR_BINDING	21	-0.747807	-2.042	0	0.000458631	0.1
HP_EPISODIC_VOMITING	34	-0.672743	-2.0417	0	0.00045679	0.1
GO_POSITIVE_REGULATION_OF_CALCIUM_ION_TRANSMEMBRANE_TRANSPORTER_ACTIVITY	37	-0.665257	-2.04117	0	0.00045925	0.101
GO_TUBE_DEVELOPMENT	914	-0.48324	-2.04028	0	0.000474554	0.105
GO_GLAND_MORPHOGENESIS	110	-0.559487	-2.03985	0	0.000476938	0.106
GO_CORONARY_VASCULATURE_DEVELOPMENT	46	-0.640703	-2.0393	0	0.000483552	0.108
GO_NEGATIVE_REGULATION_OF_CATION_CHANNEL_ACTIVITY	34	-0.680434	-2.03857	0	0.000485858	0.109
HP_CEREBRAL_ISCHEMIA	84	-0.577076	-2.03852	0	0.000483953	0.109
GO_CARDIAC_CHAMBER_DEVELOPMENT	153	-0.536804	-2.03816	0	0.00048625	0.11
GO_STRIATED_MUSCLE_THIN_FILAMENT	15	-0.808814	-2.03797	0	0.000484358	0.11
HP_ABNORMAL_AORTIC_VALVE_MORPHOLOGY	123	-0.543504	-2.03754	0	0.000486666	0.111
GO_REGULATION_OF_CELLULAR_RESPONSE_TO_VASCULAR_ENDOTHELIAL_GROWTH_FACTOR_STIMULUS	22	-0.742512	-2.03676	0	0.0004931	0.113
GO_CONDENSED_CHROMOSOME_OUTER_KINETOCHORE	13	-0.825494	-2.03568	0	0.000503562	0.116
GO_EXTRACELLULAR_MATRIX_STRUCTURAL_CONSTITUENT_CONFERRING_COMPRESSION_RESISTANCE	16	-0.807539	-2.03534	0	0.000505759	0.117
GO_NEGATIVE_REGULATION_OF_AXON_GUIDANCE	26	-0.712291	-2.03395	0	0.000512006	0.119
GO_FORMATION_OF_PRIMARY_GERM_LAYER	106	-0.554011	-2.03391	0	0.000514116	0.12
HP_ABDOMINAL_AORTIC_ANEURYSM	17	-0.777778	-2.03375	0	0.00051627	0.121
GO_HOMOTYPIC_CELL_CELL_ADHESION	67	-0.606125	-2.03368	0	0.000514322	0.121
GO_WNT_PROTEIN_BINDING	26	-0.714077	-2.03308	0	0.000536617	0.127
GO_PEPTIDE_HORMONE_BINDING	34	-0.666684	-2.0328	0	0.000534607	0.127
GO_CADHERIN_BINDING_INVOLVED_IN_CELL_CELL_ADHESION	18	-0.757768	-2.03167	0	0.000536631	0.128
GO_UROGENITAL_SYSTEM_DEVELOPMENT	287	-0.506769	-2.03044	0	0.000546565	0.131
HP_MIGRAINE	129	-0.547726	-2.03026	0	0.000544541	0.131
HP_SOFT_SKIN	32	-0.685721	-2.0295	0	0.000554405	0.134
GO_REGULATION_OF_VASCULAR_ENDOTHELIAL_GROWTH_FACTOR_RECEPTOR_SIGNALING_PATHWAY	25	-0.712496	-2.0294	0	0.000552367	0.134
GO_CARDIAC_CONDUCTION	125	-0.5401	-2.02873	0	0.000562173	0.137
GO_TAXIS	523	-0.488379	-2.02795	0	0.000560121	0.137
HP_ABNORMAL_CORONARY_ARTERY_MORPHOLOGY	42	-0.645868	-2.02699	0	0.000558084	0.137
GO_MONOCYTE_CHEMOTAXIS	37	-0.659374	-2.02677	0	0.000560004	0.137
GO_POLYSACCHARIDE_METABOLIC_PROCESS	100	-0.555179	-2.02619	0	0.000561858	0.138
GO_PLATELET_DEGRANULATION	112	-0.547843	-2.02618	0	0.000559837	0.138
HP_REDUCED_SYSTOLIC_FUNCTION	11	-0.868459	-2.02614	0	0.00055783	0.138
GO_OLIGODENDROCYTE_DIFFERENTIATION	84	-0.571196	-2.02431	0	0.000590386	0.145
GO_CARDIAC_MUSCLE_CONTRACTION	117	-0.557743	-2.02338	0	0.000607466	0.15
GO_NEGATIVE_REGULATION_OF_CELL_MATRIX_ADHESION	35	-0.668535	-2.02325	0	0.000612971	0.152
GO_AMINOGLYCAN_METABOLIC_PROCESS	149	-0.526746	-2.02272	0	0.000614621	0.152
GO_CALCIUM_ION_BINDING	559	-0.485411	-2.02124	0	0.000638975	0.157
GO_CYTOSKELETAL_PROTEIN_BINDING	895	-0.479854	-2.02111	0	0.000636733	0.157
GO_ENDODERM_FORMATION	49	-0.629913	-2.02078	0	0.000638247	0.158
GO_EMBRYO_IMPLANTATION	43	-0.637064	-2.0205	0	0.000647255	0.161
HP_ABNORMAL_MITRAL_VALVE_MORPHOLOGY	96	-0.564056	-2.01945	0	0.000656176	0.164
GO_CHROMOSOME_CENTROMERIC_REGION	187	-0.523375	-2.01924	0	0.000653906	0.164
HP_VASCULAR_TORTUOSITY	21	-0.740135	-2.01897	0	0.00065536	0.165
GO_REGULATION_OF_ACTIN_FILAMENT_ORGANIZATION	251	-0.508263	-2.01878	0	0.000653108	0.165
HP_CONCENTRIC_HYPERTROPHIC_CARDIOMYOPATHY	16	-0.804017	-2.01838	0	0.000658242	0.167
GO_POSITIVE_REGULATION_OF_CELL_ADHESION	359	-0.495316	-2.01803	0	0.000655995	0.167
HP_PREMATURE_SKIN_WRINKLING	44	-0.631479	-2.01712	0	0.000668454	0.17
GO_FILOPODIUM_MEMBRANE	16	-0.786204	-2.01673	0	0.000666188	0.17
HP_TALL_STATURE	129	-0.542471	-2.0167	0	0.000663937	0.17
HP_APLASIA_HYPOPLASIA_OF_THE_CEREBRAL_WHITE_MATTER	21	-0.731134	-2.01607	0	0.000661701	0.17
GO_NEGATIVE_REGULATION_OF_CELL_MORPHOGENESIS_INVOLVED_IN_DIFFERENTIATION	89	-0.573608	-2.01318	0	0.000706242	0.181
GO_RESPONSE_TO_WOUNDING	525	-0.487482	-2.01216	0	0.000721805	0.185
HP_NEOPLASM_OF_THE_HEART	10	-0.875807	-2.01189	0	0.000722932	0.186
GO_REGULATION_OF_BODY_FLUID_LEVELS	394	-0.492212	-2.01184	0	0.000720531	0.186
GO_REGULATION_OF_CATION_TRANSMEMBRANE_TRANSPORT	274	-0.504101	-2.01147	0	0.000732375	0.189
GO_PLATELET_ALPHA_GRANULE_LUMEN	57	-0.607792	-2.01125	0	0.000729958	0.189
GO_REGULATION_OF_CARDIAC_CONDUCTION	58	-0.598242	-2.01094	0	0.00073821	0.19
GO_CYTOCHROME_COMPLEX	32	-0.683306	-2.01008	0	0.000760544	0.196
GO_POSITIVE_REGULATION_OF_SYNAPTIC_TRANSMISSION_GLUTAMATERGIC	24	-0.708693	-2.0092	0	0.000779164	0.201
GO_REGULATION_OF_ION_TRANSMEMBRANE_TRANSPORT	384	-0.492355	-2.00906	0	0.000776626	0.201
GO_KINETOCHORE_ORGANIZATION	22	-0.740449	-2.00886	0	0.000774104	0.201
HP_ABNORMAL_RETINAL_ARTERY_MORPHOLOGY	47	-0.628625	-2.00851	0	0.000778558	0.203
HP_STUTTERING	17	-0.777468	-2.00777	0	0.000789939	0.204
GO_NEGATIVE_REGULATION_OF_BIOMINERALIZATION	22	-0.723858	-2.00755	0	0.000787399	0.204
GO_SKELETAL_SYSTEM_DEVELOPMENT	433	-0.487728	-2.00747	0	0.000784875	0.204
GO_CELLULAR_RESPONSE_TO_VASCULAR_ENDOTHELIAL_GROWTH_FACTOR_STIMULUS	58	-0.608355	-2.00722	0	0.000785817	0.205
HP_ABNORMAL_PLACENTA_MORPHOLOGY	21	-0.728186	-2.00643	0.0015528	0.00080035	0.209
GO_MYOFILAMENT	17	-0.786352	-2.00598	0	0.000811415	0.213
HP_ABNORMAL_ATRIOVENTRICULAR_CONDUCTION	61	-0.592804	-2.00583	0	0.000808848	0.213
GO_PEPTIDYL_TYROSINE_MODIFICATION	317	-0.499567	-2.00545	0	0.000819783	0.217
GO_MESENCHYME_MORPHOGENESIS	49	-0.622305	-2.0045	0	0.000840861	0.221
HP_MIXED_DEMYELINATING_AND_AXONAL_POLYNEUROPATHY	15	-0.790311	-2.00375	0	0.000848326	0.223
GO_LEUKOCYTE_CHEMOTAXIS	172	-0.520534	-2.00362	0	0.0008524	0.225
GO_SECOND_MESSENGER_MEDIATED_SIGNALING	347	-0.494708	-2.00355	0	0.000849745	0.225
HP_EPISODIC_RESPIRATORY_DISTRESS	19	-0.756602	-2.00336	0	0.000847106	0.225
GO_ALPHA_ACTININ_BINDING	24	-0.705535	-2.00244	0	0.00085113	0.226
HP_VITREORETINOPATHY	17	-0.768476	-2.00243	0	0.000848503	0.226
HP_BLUE_SCLERAE	77	-0.579805	-2.00185	0	0.000859098	0.229
HP_VENTRICULAR_TACHYCARDIA	49	-0.626613	-2.00168	0	0.000863013	0.231
GO_REGULATION_OF_THE_FORCE_OF_HEART_CONTRACTION	22	-0.733686	-2.00087	0	0.000873507	0.235
HP_OMPHALOCELE	59	-0.59486	-2.00003	0	0.000893749	0.241
GO_CORTICAL_CYTOSKELETON	94	-0.551479	-1.99974	0	0.00089428	0.242
GO_GASTRULATION	159	-0.522562	-1.99966	0	0.00089157	0.242
GO_CELL_CELL_ADHESION	711	-0.474591	-1.99957	0	0.000892116	0.242
GO_RECEPTOR_REGULATOR_ACTIVITY	322	-0.490034	-1.99936	0	0.000892616	0.242
HP_SUDDEN_DEATH	20	-0.744363	-1.99921	0	0.000896366	0.244
GO_STRIATED_MUSCLE_CELL_PROLIFERATION	63	-0.589347	-1.99864	0	0.000909679	0.248
GO_REGULATION_OF_MONONUCLEAR_CELL_MIGRATION	37	-0.652484	-1.99849	0	0.00091017	0.248
HP_STROKE_LIKE_EPISODE	23	-0.721978	-1.9981	0	0.000913808	0.25
HP_HEMOPTYSIS	48	-0.618772	-1.99772	0	0.000917465	0.252
GO_POSITIVE_REGULATION_OF_BLOOD_CIRCULATION	55	-0.606164	-1.99733	0	0.000924277	0.253
GO_CARDIAC_CHAMBER_MORPHOGENESIS	110	-0.546646	-1.9973	0	0.000921551	0.253
GO_NEGATIVE_REGULATION_OF_TRANSPORTER_ACTIVITY	66	-0.591016	-1.99694	0	0.000934619	0.258
HP_ASCENDING_TUBULAR_AORTA_ANEURYSM	18	-0.764111	-1.99623	0	0.000957131	0.264
GO_POSITIVE_REGULATION_OF_TRANSFORMING_GROWTH_FACTOR_BETA_PRODUCTION	19	-0.754918	-1.99574	0	0.000960611	0.266
GO_ACTIN_POLYMERIZATION_OR_DEPOLYMERIZATION	201	-0.513858	-1.99557	0	0.000960939	0.267
GO_MYOSIN_COMPLEX	45	-0.61869	-1.99554	0	0.000958146	0.267
HP_ABNORMAL_UMBILICUS_MORPHOLOGY	219	-0.512128	-1.99532	0	0.000958496	0.267
GO_CELL_COMMUNICATION_BY_ELECTRICAL_COUPLING	27	-0.697317	-1.99523	0	0.000955726	0.267
HP_CONGENITAL_HIP_DISLOCATION	71	-0.573656	-1.9951	0	0.000952972	0.267
GO_REGULATION_OF_CALCIUM_ION_TRANSMEMBRANE_TRANSPORT	122	-0.544001	-1.99439	0	0.000953342	0.267
GO_REGULATION_OF_OSSIFICATION	173	-0.514507	-1.99415	0	0.000953692	0.268
GO_AORTA_MORPHOGENESIS	29	-0.686361	-1.99378	0	0.000960186	0.27
GO_REGULATION_OF_EPITHELIAL_CELL_APOPTOTIC_PROCESS	65	-0.598817	-1.99333	0	0.00096359	0.271
GO_REGULATION_OF_VASCULAR_ASSOCIATED_SMOOTH_MUSCLE_CELL_PROLIFERATION	48	-0.622822	-1.99233	0	0.000973053	0.274
GO_REGULATION_OF_GLOMERULAR_FILTRATION	10	-0.864675	-1.99179	0	0.000979458	0.277
GO_PLATELET_DERIVED_GROWTH_FACTOR_BINDING	11	-0.861872	-1.99175	0	0.000976691	0.277
GO_REGULATION_OF_BLOOD_PRESSURE	138	-0.531444	-1.99146	0	0.000983021	0.279
HP_ABNORMALITY_OF_PULMONARY_CIRCULATION	135	-0.535354	-1.99139	0	0.00098026	0.279
HP_TYPE_I_DIABETES_MELLITUS	44	-0.628133	-1.99135	0	0.000977514	0.279
GO_NEPHRON_DEVELOPMENT	126	-0.535871	-1.98984	0	0.000995757	0.285
HP_BULBAR_SIGNS	31	-0.670613	-1.98811	0	0.00102889	0.29
GO_CATION_CHANNEL_COMPLEX	177	-0.518248	-1.98805	0	0.00102604	0.29
GO_KINETOCHORE_ASSEMBLY	17	-0.75874	-1.98794	0	0.0010262	0.291
HP_ABNORMAL_HEART_VALVE_MORPHOLOGY	246	-0.503682	-1.98774	0	0.00102337	0.291
GO_POSITIVE_REGULATION_OF_ION_TRANSPORT	218	-0.500852	-1.98767	0	0.00102055	0.291
GO_CELL_JUNCTION_ORGANIZATION	613	-0.475234	-1.98743	0	0.00102069	0.292
GO_POSITIVE_REGULATION_OF_LEUKOCYTE_CHEMOTAXIS	74	-0.577684	-1.98742	0	0.0010179	0.292
HP_ILEUS	13	-0.810879	-1.98726	0	0.00101512	0.292
HP_ARTERIOSCLEROSIS	71	-0.576414	-1.98611	0	0.00103284	0.297
GO_CYCLIC_NUCLEOTIDE_MEDIATED_SIGNALING	162	-0.518614	-1.98583	0	0.00103294	0.297
GO_ACTIN_FILAMENT_DEPOLYMERIZATION	53	-0.614099	-1.9857	0	0.00103014	0.297
GO_FACIAL_NERVE_MORPHOGENESIS	10	-0.86895	-1.98487	0	0.00105058	0.304
GO_REGULATION_OF_SYNAPSE_ASSEMBLY	83	-0.567077	-1.98413	0	0.00106521	0.309
HP_INTESTINAL_HYPOPLASIA	15	-0.790589	-1.98365	0	0.0010739	0.311
GO_CORTICAL_ACTIN_CYTOSKELETON	71	-0.571034	-1.98353	0	0.00107102	0.311
GO_NEURAL_CREST_CELL_DIFFERENTIATION	82	-0.562492	-1.98353	0	0.00106816	0.311
HP_HIGH_NARROW_PALATE	117	-0.536339	-1.98271	0	0.00108532	0.317
GO_MEMBRANE_REPOLARIZATION	40	-0.638061	-1.98257	0	0.00108532	0.317
GO_GLOMERULAR_MESANGIUM_DEVELOPMENT	14	-0.81351	-1.98111	0	0.0011279	0.329
HP_RETINAL_ARTERIAL_TORTUOSITY	11	-0.847075	-1.98105	0	0.00112492	0.329
GO_REGULATION_OF_TRANSMEMBRANE_TRANSPORT	458	-0.479725	-1.98104	0	0.00112195	0.329
GO_POSITIVE_REGULATION_OF_ION_TRANSMEMBRANE_TRANSPORT	125	-0.536964	-1.98101	0	0.001119	0.329
HP_CARDIOMEGALY	80	-0.571482	-1.9809	0	0.00111606	0.329
GO_OSSIFICATION	348	-0.488374	-1.98085	0	0.00111314	0.329
GO_REGULATION_OF_STRIATED_MUSCLE_CONTRACTION	77	-0.570446	-1.98069	0	0.00111023	0.329
HP_SUBCUTANEOUS_HEMORRHAGE	181	-0.517695	-1.98046	0	0.00111015	0.329
HP_PSYCHOTIC_MENTATION	16	-0.783141	-1.98025	0	0.00110726	0.329
GO_INTEGRIN_ACTIVATION	19	-0.73685	-1.97984	0	0.00111559	0.331
GO_POSITIVE_REGULATION_OF_ACTIN_FILAMENT_BUNDLE_ASSEMBLY	57	-0.585077	-1.97982	0	0.0011127	0.331
HP_ABNORMAL_SACRUM_MORPHOLOGY	100	-0.539347	-1.97931	0	0.00112371	0.334
GO_PROTEOGLYCAN_BINDING	32	-0.66604	-1.97861	0	0.0011374	0.337
GO_SARCOPLASM	71	-0.585601	-1.97855	0	0.00113725	0.337
GO_NEGATIVE_REGULATION_OF_LYMPHOCYTE_DIFFERENTIATION	42	-0.630336	-1.97843	0	0.0011371	0.338
HP_ABNORMAL_VASCULAR_PHYSIOLOGY	160	-0.518475	-1.97822	0	0.00113969	0.34
GO_BASEMENT_MEMBRANE_ORGANIZATION	28	-0.680426	-1.97817	0	0.00113953	0.341
GO_PARASYMPATHETIC_NERVOUS_SYSTEM_DEVELOPMENT	15	-0.780348	-1.97809	0	0.00113664	0.341
GO_NEGATIVE_REGULATION_OF_LEUKOCYTE_DIFFERENTIATION	81	-0.569712	-1.97766	0	0.00114471	0.343
GO_METANEPHROS_DEVELOPMENT	76	-0.555879	-1.97753	0	0.00114724	0.344
GO_PROTEIN_TYROSINE_KINASE_ACTIVITY	123	-0.531575	-1.97701	0	0.00115516	0.347
GO_FILAMENTOUS_ACTIN	31	-0.665581	-1.97678	0.00145349	0.00116578	0.351
GO_HORMONE_BINDING	62	-0.594389	-1.97672	0	0.00116286	0.351
GO_ACTIN_MONOMER_BINDING	24	-0.704484	-1.9767	0	0.00115995	0.351
GO_POSITIVE_REGULATION_OF_SMOOTH_MUSCLE_CELL_PROLIFERATION	78	-0.564361	-1.97552	0	0.00120263	0.362
GO_PLASMA_MEMBRANE_SIGNALING_RECEPTOR_COMPLEX	160	-0.516187	-1.97526	0	0.00121562	0.364
GO_PLATELET_AGGREGATION	49	-0.616071	-1.97517	0	0.00121529	0.365
GO_NEGATIVE_REGULATION_OF_CELL_DEVELOPMENT	280	-0.493808	-1.97412	0	0.0012309	0.37
GO_POSITIVE_REGULATION_OF_SYNAPSE_ASSEMBLY	49	-0.617514	-1.97405	0	0.00123314	0.372
HP_PULMONARY_ARTERIAL_HYPERTENSION	103	-0.545899	-1.97376	0	0.00124334	0.377
HP_CONGESTIVE_HEART_FAILURE	190	-0.513551	-1.97361	0	0.00124555	0.377
GO_POSITIVE_REGULATION_OF_VASCULAR_ENDOTHELIAL_GROWTH_FACTOR_RECEPTOR_SIGNALING_PATHWAY	11	-0.839669	-1.97309	0	0.00125567	0.381
GO_KERATAN_SULFATE_CATABOLIC_PROCESS	11	-0.851676	-1.97292	0	0.00126046	0.382
GO_MACROPHAGE_CHEMOTAXIS	35	-0.66715	-1.97292	0	0.00125739	0.382
GO_VENTRICULAR_CARDIAC_MUSCLE_CELL_DIFFERENTIATION	15	-0.783276	-1.97288	0	0.00125955	0.383
GO_POSITIVE_REGULATION_OF_URINE_VOLUME	12	-0.83794	-1.97262	0	0.00125908	0.383
HP_ELBOW_FLEXION_CONTRACTURE	59	-0.594875	-1.97247	0	0.00125861	0.384
GO_ATTACHMENT_OF_MITOTIC_SPINDLE_MICROTUBULES_TO_KINETOCHORE	15	-0.780965	-1.97238	0	0.00125557	0.384
GO_TRANSFORMING_GROWTH_FACTOR_BETA_PRODUCTION	36	-0.649818	-1.97155	0	0.00128365	0.393
GO_CHROMATIN_REMODELING_AT_CENTROMERE	31	-0.664569	-1.9709	0	0.00130124	0.399
GO_CARDIAC_SEPTUM_MORPHOGENESIS	67	-0.574859	-1.97079	0	0.00130327	0.401
GO_GLIAL_CELL_DIFFERENTIATION	189	-0.505322	-1.96934	0	0.00132838	0.404
GO_GABA_ERGIC_SYNAPSE	51	-0.6025	-1.96886	0	0.00133547	0.406
GO_REGULATION_OF_LYMPHOCYTE_DIFFERENTIATION	153	-0.516308	-1.96776	0	0.0013502	0.409
GO_SYNAPSE_ORGANIZATION	363	-0.479804	-1.96738	0	0.00135464	0.41
GO_CRANIAL_NERVE_MORPHOGENESIS	22	-0.720415	-1.96727	0	0.00135903	0.413
GO_SYNAPSE_ASSEMBLY	152	-0.521312	-1.96723	0	0.00135582	0.413
GO_POSITIVE_REGULATION_OF_SMAD_PROTEIN_SIGNAL_TRANSDUCTION	14	-0.780834	-1.96707	0	0.00135514	0.413
GO_G_PROTEIN_COUPLED_RECEPTOR_SIGNALING_PATHWAY_COUPLED_TO_CYCLIC_NUCLEOTIDE_SECOND_MESSENGER	172	-0.513921	-1.96702	0	0.00135195	0.413
HP_PALMOPLANTAR_KERATODERMA	125	-0.533739	-1.96693	0	0.00135632	0.416
GO_REGULATION_OF_CELLULAR_EXTRAVASATION	26	-0.68343	-1.96641	0	0.00136568	0.419
GO_EPHRIN_RECEPTOR_SIGNALING_PATHWAY	80	-0.563506	-1.96511	0	0.0014002	0.429
GO_REGULATION_OF_CELL_JUNCTION_ASSEMBLY	170	-0.510248	-1.96484	0	0.00140199	0.429
HP_ARTERIAL_STENOSIS	131	-0.521776	-1.96445	0	0.00141369	0.433
GO_REGULATION_OF_PEPTIDYL_TYROSINE_PHOSPHORYLATION	214	-0.49807	-1.96424	0	0.00142283	0.435
GO_PHOSPHOLIPASE_C_ACTIVITY	23	-0.701012	-1.96341	0.00149701	0.00144444	0.442
HP_CORONARY_ARTERY_ATHEROSCLEROSIS	34	-0.64739	-1.96235	0	0.0014833	0.45
GO_POSITIVE_REGULATION_OF_FIBROBLAST_MIGRATION	15	-0.790509	-1.96205	0	0.00149233	0.455
GO_LYSOSOMAL_LUMEN	86	-0.556305	-1.96144	0	0.00150369	0.456
GO_METALLOPEPTIDASE_ACTIVITY	152	-0.518101	-1.96029	0	0.00153473	0.465
GO_EPITHELIAL_CELL_APOPTOTIC_PROCESS	87	-0.553981	-1.96028	0	0.00153122	0.465
GO_PLASMA_MEMBRANE_PROTEIN_COMPLEX	478	-0.474459	-1.95996	0	0.0015351	0.467
GO_REGULATION_OF_SYNAPSE_STRUCTURE_OR_ACTIVITY	196	-0.505167	-1.95984	0	0.00153406	0.468
GO_CARDIAC_EPITHELIAL_TO_MESENCHYMAL_TRANSITION	31	-0.663209	-1.95983	0	0.00153058	0.468
GO_NEGATIVE_REGULATION_OF_HORMONE_SECRETION	48	-0.606885	-1.95962	0	0.00153438	0.469
GO_REGULATION_OF_METAL_ION_TRANSPORT	314	-0.48604	-1.95903	0	0.00156257	0.477
GO_REGULATION_OF_SUPRAMOLECULAR_FIBER_ORGANIZATION	336	-0.481205	-1.95836	0	0.00158331	0.481
GO_NITRIC_OXIDE_SYNTHASE_BINDING	14	-0.788334	-1.95835	0.0015456	0.00157975	0.481
GO_MYOSIN_FILAMENT	13	-0.800067	-1.95812	0.00169205	0.00158586	0.483
HP_FLEXION_CONTRACTURE_OF_FINGER	175	-0.504179	-1.95811	0	0.0015823	0.483
GO_NEGATIVE_REGULATION_OF_TRANSMEMBRANE_TRANSPORT	103	-0.539064	-1.95784	0	0.00158357	0.484
GO_REGULATION_OF_COLLAGEN_METABOLIC_PROCESS	39	-0.633899	-1.95783	0	0.00158003	0.484
GO_CELL_CELL_CONTACT_ZONE	69	-0.570512	-1.9572	0	0.00159083	0.489
HP_LIMITED_ELBOW_MOVEMENT	99	-0.546955	-1.95704	0	0.00159202	0.49
GO_CYTOKINE_RECEPTOR_BINDING	181	-0.500086	-1.95666	0	0.00159563	0.493
GO_REGULATION_OF_CYTOSOLIC_CALCIUM_ION_CONCENTRATION	265	-0.490835	-1.95655	0	0.00159688	0.494
GO_BLOOD_VESSEL_ENDOTHELIAL_CELL_MIGRATION	119	-0.52509	-1.95654	0	0.00159335	0.494
GO_POLYSACCHARIDE_BIOSYNTHETIC_PROCESS	72	-0.568792	-1.95653	0	0.00158984	0.494
GO_POSITIVE_REGULATION_OF_SMOOTH_MUSCLE_CONTRACTION	23	-0.700821	-1.95597	0	0.00160287	0.496
HP_MESOMELIA	28	-0.672384	-1.95464	0	0.00164172	0.503
HP_ABNORMAL_CIRCULATING_CITRULLINE_CONCENTRATION	16	-0.766753	-1.95346	0	0.00168276	0.514
GO_RENAL_SYSTEM_PROCESS_INVOLVED_IN_REGULATION_OF_BLOOD_VOLUME	12	-0.830412	-1.9534	0.00162602	0.00168144	0.515
GO_PHAGOCYTOSIS	233	-0.497402	-1.95319	0	0.00168715	0.516
GO_RESPONSE_TO_TRANSFORMING_GROWTH_FACTOR_BETA	222	-0.497182	-1.95261	0	0.00170218	0.518
GO_RESPONSE_TO_GROWTH_FACTOR	627	-0.466348	-1.95224	0	0.00171011	0.518
HP_PROMINENT_METOPIC_RIDGE	40	-0.624659	-1.95202	0	0.00171336	0.521
GO_CONDENSED_NUCLEAR_CHROMOSOME_KINETOCHORE	17	-0.739836	-1.95199	0	0.00171199	0.521
HP_PROGRESSIVE_MUSCLE_WEAKNESS	57	-0.584456	-1.95174	0	0.00171521	0.522
GO_REGULATION_OF_CALCIUM_MEDIATED_SIGNALING	83	-0.553286	-1.95155	0	0.00171384	0.523
GO_MYOSIN_II_COMPLEX	13	-0.79589	-1.9506	0.00166945	0.00175848	0.531
HP_PULMONARY_EDEMA	11	-0.849537	-1.95004	0	0.00176385	0.533
GO_GLIAL_CELL_PROLIFERATION	40	-0.623192	-1.94986	0	0.00176695	0.535
GO_CELLULAR_COMPONENT_MORPHOGENESIS	697	-0.461244	-1.94979	0	0.00176777	0.537
GO_COAGULATION	268	-0.486041	-1.94898	0	0.00179595	0.544
GO_CELL_SUBSTRATE_JUNCTION_ORGANIZATION	99	-0.53947	-1.9481	0	0.00181255	0.546
GO_TRANSFORMING_GROWTH_FACTOR_BETA_RECEPTOR_BINDING	22	-0.702225	-1.94689	0	0.00185204	0.557
HP_APHASIA	53	-0.595094	-1.94665	0	0.00186175	0.559
HP_GLOMERULOSCLEROSIS	72	-0.567588	-1.94541	0	0.0018964	0.566
GO_ACTIN_FILAMENT	110	-0.535119	-1.94513	0	0.00189922	0.566
GO_BONE_MINERALIZATION	100	-0.540711	-1.94501	0	0.00189973	0.568
HP_HEART_BLOCK	82	-0.550065	-1.9445	0	0.00192046	0.573
GO_REGULATION_OF_CARDIOCYTE_DIFFERENTIATION	49	-0.59588	-1.94426	0	0.00192095	0.573
HP_INTRACRANIAL_HEMORRHAGE	106	-0.53883	-1.94412	0	0.00191919	0.573
GO_POSITIVE_REGULATION_OF_CELL_POPULATION_PROLIFERATION	760	-0.463422	-1.94389	0	0.00192409	0.574
HP_LIMITATION_OF_JOINT_MOBILITY	304	-0.482028	-1.94327	0	0.00193791	0.578
GO_CELL_ADHESION_MEDIATOR_ACTIVITY	55	-0.587911	-1.94306	0	0.00193836	0.578
GO_STRIATED_MUSCLE_CONTRACTION	145	-0.517678	-1.94289	0	0.00194328	0.581
HP_ABNORMAL_AORTIC_VALVE_PHYSIOLOGY	121	-0.525409	-1.9422	0	0.00196811	0.584
GO_RHO_PROTEIN_SIGNAL_TRANSDUCTION	127	-0.521782	-1.94115	0	0.00199947	0.592
GO_NEGATIVE_REGULATION_OF_SECRETION	153	-0.509389	-1.94063	0	0.00202194	0.598
GO_TISSUE_REGENERATION	62	-0.577836	-1.93916	0	0.00206631	0.604
HP_RECURRENT_PANCREATITIS	18	-0.733665	-1.93905	0	0.00206649	0.605
HP_MYOPATHY	279	-0.489614	-1.93881	0	0.0020689	0.606
GO_REGULATION_OF_RENAL_SYSTEM_PROCESS	29	-0.660413	-1.93866	0	0.00207785	0.607
GO_RESPONSE_TO_INTERFERON_GAMMA	165	-0.499971	-1.93849	0	0.00207579	0.607
GO_RENAL_SYSTEM_PROCESS_INVOLVED_IN_REGULATION_OF_SYSTEMIC_ARTERIAL_BLOOD_PRESSURE	20	-0.723773	-1.93777	0	0.00209564	0.61
HP_LOW_PLASMA_CITRULLINE	13	-0.788683	-1.93713	0	0.00212193	0.613
GO_REGULATION_OF_ANATOMICAL_STRUCTURE_MORPHOGENESIS	970	-0.459615	-1.93712	0	0.00211982	0.614
HP_AORTIC_ANEURYSM	104	-0.53635	-1.93639	0	0.0021459	0.621
GO_RESPIRATORY_CHAIN_COMPLEX_IV	18	-0.753217	-1.93619	0	0.00215021	0.624
GO_REGULATION_OF_TUBE_SIZE	113	-0.528829	-1.93491	0	0.00221278	0.637
GO_REGULATION_OF_BONE_DEVELOPMENT	21	-0.707299	-1.93474	0	0.00221266	0.639
GO_ENDODERM_DEVELOPMENT	70	-0.554372	-1.93334	0	0.00224913	0.647
GO_ENDOTHELIAL_CELL_PROLIFERATION	136	-0.508777	-1.93322	0	0.00225538	0.649
GO_POTASSIUM_ION_TRANSPORT	177	-0.504826	-1.93319	0	0.00225088	0.649
GO_CELLULAR_HYPEROSMOTIC_RESPONSE	14	-0.793147	-1.93304	0	0.00225065	0.649
GO_CELL_CHEMOTAXIS	230	-0.491519	-1.93259	0	0.0022654	0.65
GO_PLASMINOGEN_ACTIVATION	16	-0.770051	-1.93247	0	0.00226731	0.652
GO_COMPLEMENT_ACTIVATION	48	-0.599808	-1.93187	0	0.0022862	0.656
GO_RESPONSE_TO_OXYGEN_LEVELS	356	-0.473728	-1.93175	0	0.0022944	0.659
GO_REGULATION_OF_CARDIAC_MUSCLE_CONTRACTION	69	-0.568844	-1.93146	0	0.0023005	0.659
GO_NEGATIVE_REGULATION_OF_ION_TRANSMEMBRANE_TRANSPORT	83	-0.55061	-1.9311	0	0.00231501	0.66
GO_REGULATION_OF_ION_TRANSPORT	548	-0.466223	-1.93091	0	0.00231681	0.66
GO_ADENYLATE_CYCLASE_ACTIVATING_G_PROTEIN_COUPLED_RECEPTOR_SIGNALING_PATHWAY	99	-0.534703	-1.93082	0	0.00231439	0.661
GO_OXIDOREDUCTASE_ACTIVITY_ACTING_ON_THE_CH_NH2_GROUP_OF_DONORS_OXYGEN_AS_ACCEPTOR	15	-0.763025	-1.92862	0	0.00241498	0.676
GO_NEURON_PROJECTION_GUIDANCE	242	-0.486666	-1.92837	0	0.00242497	0.679
HP_ABNORMAL_URETER_MORPHOLOGY	112	-0.525854	-1.92793	0	0.00245367	0.683
GO_OUTFLOW_TRACT_MORPHOGENESIS	68	-0.567894	-1.92713	0	0.00248848	0.688
GO_REGULATION_OF_SMOOTH_MUSCLE_CONTRACTION	50	-0.589387	-1.92705	0.00137363	0.00248782	0.688
GO_POSITIVE_REGULATION_OF_CALCIUM_ION_TRANSPORT_INTO_CYTOSOL	37	-0.626837	-1.927	0.00143678	0.002483	0.688
GO_POSITIVE_REGULATION_OF_RELEASE_OF_SEQUESTERED_CALCIUM_ION_INTO_CYTOSOL	30	-0.665937	-1.92692	0	0.00247819	0.688
GO_REGULATION_OF_CHROMOSOME_SEGREGATION	98	-0.539511	-1.92641	0	0.00249823	0.692
GO_CARDIAC_SEPTUM_DEVELOPMENT	104	-0.525944	-1.92529	0	0.00253275	0.696
HP_SLOW_DECREASE_IN_VISUAL_ACUITY	27	-0.666999	-1.92523	0	0.00253202	0.696
HP_ABNORMAL_MITOCHONDRIA_IN_MUSCLE_TISSUE	46	-0.599573	-1.9252	0	0.00252921	0.696
GO_ELASTIC_FIBER_ASSEMBLY	10	-0.839458	-1.92515	0	0.00252844	0.696
HP_ABNORMALITY_OF_CARDIOVASCULAR_SYSTEM_ELECTROPHYSIOLOGY	394	-0.468056	-1.92508	0	0.00252361	0.696
GO_POSITIVE_REGULATION_OF_ENDOTHELIAL_CELL_APOPTOTIC_PROCESS	16	-0.758265	-1.92505	0	0.00252287	0.696
GO_SISTER_CHROMATID_SEGREGATION	188	-0.499112	-1.92456	0	0.00254051	0.7
GO_STRUCTURAL_MOLECULE_ACTIVITY_CONFERRING_ELASTICITY	11	-0.825943	-1.92429	0	0.00254791	0.704
GO_INTRINSIC_COMPONENT_OF_POSTSYNAPTIC_MEMBRANE	86	-0.537958	-1.92411	0	0.00254919	0.704
GO_ATP_SYNTHESIS_COUPLED_ELECTRON_TRANSPORT	94	-0.54084	-1.92407	0	0.00254436	0.704
GO_NEGATIVE_REGULATION_OF_VIRAL_GENOME_REPLICATION	53	-0.5947	-1.92396	0	0.00254159	0.704
GO_REGULATION_OF_SYSTEMIC_ARTERIAL_BLOOD_PRESSURE_MEDIATED_BY_A_CHEMICAL_SIGNAL	34	-0.645315	-1.92318	0	0.00259161	0.707
GO_POSITIVE_REGULATION_OF_PHAGOCYTOSIS	53	-0.577342	-1.92298	0	0.00259485	0.709
GO_NEGATIVE_REGULATION_OF_SMOOTH_MUSCLE_CELL_PROLIFERATION	43	-0.615011	-1.92164	0	0.00265249	0.714
GO_REGULATION_OF_ACTIN_FILAMENT_LENGTH	173	-0.498742	-1.92157	0	0.00264953	0.714
GO_REGULATION_OF_CYTOSKELETON_ORGANIZATION	508	-0.46002	-1.92137	0	0.00265465	0.715
GO_NEGATIVE_REGULATION_OF_NERVOUS_SYSTEM_DEVELOPMENT	261	-0.481816	-1.92081	0	0.00268382	0.719
GO_REGULATION_OF_TRANSPORTER_ACTIVITY	230	-0.48469	-1.91985	0	0.00272487	0.725
GO_CHEMOREPELLENT_ACTIVITY	26	-0.683856	-1.91977	0	0.00272379	0.727
GO_NEGATIVE_REGULATION_OF_RYANODINE_SENSITIVE_CALCIUM_RELEASE_CHANNEL_ACTIVITY	10	-0.836569	-1.91949	0	0.00273664	0.732
GO_REGULATION_OF_POTASSIUM_ION_TRANSPORT	80	-0.554084	-1.91932	0	0.00273953	0.734
GO_FLUID_TRANSPORT	19	-0.730811	-1.91873	0.0015361	0.00277818	0.741
HP_HEMIPARESIS	86	-0.537433	-1.91833	0	0.00278492	0.743
HP_NARROW_PALATE	147	-0.507423	-1.91828	0	0.00278176	0.743
GO_RESPIRATORY_CHAIN_COMPLEX	81	-0.547878	-1.9182	0	0.00277863	0.743
GO_REGULATION_OF_MACROPHAGE_CHEMOTAXIS	26	-0.671424	-1.91813	0.00151745	0.00277946	0.744
GO_POSITIVE_REGULATION_OF_ENDOTHELIAL_CELL_PROLIFERATION	88	-0.533474	-1.91782	0	0.00279604	0.746
HP_FRAGILE_SKIN	23	-0.701462	-1.91756	0	0.00280663	0.75
HP_WRIST_FLEXION_CONTRACTURE	10	-0.830809	-1.91726	0.00163399	0.00282508	0.754
HP_INCOMPLETE_PENETRANCE	125	-0.520992	-1.9164	0	0.00288066	0.76
GO_KERATIN_FILAMENT	25	-0.673553	-1.91627	0	0.0028852	0.762
HP_MULTIPLE_GLOMERULAR_CYSTS	12	-0.801145	-1.91597	0	0.0028936	0.763
GO_REGULATION_OF_CELL_SUBSTRATE_JUNCTION_ORGANIZATION	64	-0.572297	-1.91575	0	0.00290985	0.764
HP_CENTRAL_SCOTOMA	38	-0.627494	-1.9156	0	0.00291239	0.765
HP_HIP_CONTRACTURE	37	-0.622414	-1.91556	0	0.00290906	0.766
HP_SPINAL_RIGIDITY	52	-0.581766	-1.91401	0	0.00299114	0.777
HP_MITOCHONDRIAL_MYOPATHY	63	-0.571223	-1.91361	0.00131406	0.00300121	0.779
HP_ABNORMALITY_OF_HEAD_BLOOD_VESSEL	57	-0.580268	-1.91361	0	0.00299581	0.779
GO_MULTICELLULAR_ORGANISMAL_SIGNALING	170	-0.498819	-1.91297	0	0.00301743	0.782
GO_MUCOPOLYSACCHARIDE_METABOLIC_PROCESS	104	-0.526349	-1.91246	0	0.00303891	0.785
HP_ANKLE_FLEXION_CONTRACTURE	33	-0.639409	-1.91237	0	0.00303539	0.786
GO_COLLAGEN_METABOLIC_PROCESS	90	-0.546142	-1.91158	0	0.00307017	0.792
GO_INOSITOL_PHOSPHATE_MEDIATED_SIGNALING	48	-0.594469	-1.91156	0	0.0030647	0.792
GO_VASCULAR_PROCESS_IN_CIRCULATORY_SYSTEM	154	-0.506549	-1.91091	0	0.00308797	0.795
HP_ABNORMALITY_OF_KREBS_CYCLE_METABOLISM	19	-0.705709	-1.91048	0	0.00311109	0.8
GO_REGULATION_OF_T_CELL_DIFFERENTIATION	127	-0.507417	-1.90987	0	0.00314561	0.805
GO_INOSITOL_LIPID_MEDIATED_SIGNALING	169	-0.497196	-1.9086	0	0.00321413	0.811
GO_ENZYME_LINKED_RECEPTOR_PROTEIN_SIGNALING_PATHWAY	925	-0.450329	-1.9085	0	0.00321226	0.811
HP_ABNORMAL_ADIPOSE_TISSUE_MORPHOLOGY	182	-0.495756	-1.9083	0	0.00322176	0.812
GO_POSITIVE_REGULATION_OF_CARDIOCYTE_DIFFERENTIATION	27	-0.661382	-1.90782	0	0.00323503	0.813
GO_CLEAVAGE_FURROW	47	-0.598255	-1.90743	0	0.00325578	0.815
GO_POSITIVE_REGULATION_OF_MUSCLE_CONTRACTION	33	-0.641366	-1.90742	0.00143062	0.00325007	0.815
GO_POSITIVE_REGULATION_OF_CELL_DIVISION	66	-0.560567	-1.90715	0	0.00325191	0.816
GO_POSITIVE_REGULATION_OF_TRANSPORTER_ACTIVITY	93	-0.540182	-1.90684	0	0.00326872	0.816
HP_SYNOSTOSIS_OF_JOINTS	139	-0.505592	-1.90677	0	0.00326674	0.817
HP_LEBER_OPTIC_ATROPHY	11	-0.814408	-1.90597	0	0.00328912	0.821
HP_LIMITED_HIP_MOVEMENT	47	-0.590383	-1.90567	0	0.00330397	0.823
GO_VOLTAGE_GATED_ION_CHANNEL_ACTIVITY	155	-0.499423	-1.90564	0	0.00330385	0.823
GO_REGULATION_OF_BONE_MINERALIZATION	65	-0.562379	-1.90557	0	0.00329999	0.823
HP_FLUCTUATIONS_IN_CONSCIOUSNESS	21	-0.701708	-1.90526	0	0.00330728	0.824
GO_TISSUE_MORPHOGENESIS	580	-0.45506	-1.90524	0	0.00330713	0.824
GO_CARDIAC_MUSCLE_CELL_PROLIFERATION	51	-0.59348	-1.90453	0.00134953	0.00332734	0.824
GO_NEGATIVE_REGULATION_OF_CALCIUM_MEDIATED_SIGNALING	28	-0.648342	-1.90421	0	0.00333639	0.825
GO_MICROFIBRIL	10	-0.8313	-1.90417	0	0.00333066	0.825
GO_OUTFLOW_TRACT_SEPTUM_MORPHOGENESIS	25	-0.677506	-1.90403	0	0.00333047	0.825
GO_SPROUTING_ANGIOGENESIS	122	-0.511883	-1.90401	0	0.00332477	0.825
GO_REGULATION_OF_RESPONSE_TO_WOUNDING	146	-0.501731	-1.90209	0	0.00344393	0.843
GO_ACTIN_BASED_CELL_PROJECTION	195	-0.486637	-1.90195	0	0.00344175	0.843
GO_METALLOENDOPEPTIDASE_ACTIVITY	83	-0.550059	-1.90161	0	0.00345792	0.845
GO_ETHANOL_OXIDATION	10	-0.833623	-1.90122	0	0.00349398	0.849
GO_HEPARAN_SULFATE_PROTEOGLYCAN_METABOLIC_PROCESS	27	-0.666701	-1.9007	0	0.00353186	0.851
GO_POSTSYNAPTIC_MEMBRANE	215	-0.48278	-1.9006	0	0.00353318	0.851
GO_REGULATION_OF_CELL_ADHESION_MEDIATED_BY_INTEGRIN	42	-0.607511	-1.90051	0	0.003529	0.851
HP_DIAPHRAGMATIC_WEAKNESS	15	-0.737303	-1.90036	0.0015748	0.00353211	0.852
GO_PROTEOGLYCAN_METABOLIC_PROCESS	79	-0.549818	-1.90009	0.00128041	0.00354242	0.854
GO_METAPHASE_PLATE_CONGRESSION	60	-0.568923	-1.90004	0	0.00353825	0.854
GO_POSITIVE_REGULATION_OF_CELLULAR_EXTRAVASATION	16	-0.755168	-1.89982	0.00153374	0.00354672	0.855
HP_DUPLICATION_OF_THUMB_PHALANX	27	-0.648118	-1.89867	0.0015748	0.00362553	0.859
HP_SEGMENTAL_PERIPHERAL_DEMYELINATION_REMYELINATION	21	-0.693	-1.89863	0.00151515	0.00361946	0.859
HP_OPTIC_NEUROPATHY	52	-0.580994	-1.89863	0	0.0036134	0.859
GO_METANEPHRIC_GLOMERULUS_DEVELOPMENT	13	-0.781107	-1.89847	0	0.00361457	0.86
GO_REGULATION_OF_AXON_GUIDANCE	38	-0.619266	-1.89836	0	0.00361929	0.861
GO_NEGATIVE_REGULATION_OF_BLOOD_VESSEL_DIAMETER	64	-0.564952	-1.89798	0	0.00363114	0.863
GO_NEGATIVE_REGULATION_OF_T_CELL_DIFFERENTIATION	36	-0.626242	-1.89735	0.0030303	0.00366966	0.868
GO_HETEROTYPIC_CELL_CELL_ADHESION	51	-0.577253	-1.89713	0	0.00367423	0.868
GO_MITOTIC_NUCLEAR_DIVISION	265	-0.473299	-1.89654	0	0.00370901	0.871
GO_CATECHOLAMINE_SECRETION	41	-0.604804	-1.89627	0	0.00371882	0.872
GO_CALCIUM_DEPENDENT_PROTEIN_BINDING	58	-0.573489	-1.89583	0	0.00374992	0.874
GO_POSITIVE_REGULATION_OF_TRANSMEMBRANE_RECEPTOR_PROTEIN_SERINE_THREONINE_KINASE_SIGNALING_PATHWAY	94	-0.530972	-1.89513	0	0.00378979	0.876
GO_CRANIAL_NERVE_DEVELOPMENT	40	-0.595745	-1.89495	0.00141643	0.00378885	0.876
GO_ANIMAL_ORGAN_MORPHOGENESIS	905	-0.449711	-1.89465	0	0.0038038	0.877
GO_POSITIVE_REGULATION_OF_CARDIAC_MUSCLE_TISSUE_DEVELOPMENT	43	-0.602385	-1.89389	0	0.00386438	0.885
GO_NEGATIVE_REGULATION_OF_MUSCLE_TISSUE_DEVELOPMENT	53	-0.573214	-1.89355	0	0.00387382	0.885
HP_ARTHRITIS	158	-0.493564	-1.89316	0	0.00389028	0.885
GO_EPITHELIAL_CELL_PROLIFERATION	342	-0.466173	-1.89308	0	0.00388919	0.885
GO_NEGATIVE_REGULATION_OF_RESPONSE_TO_EXTERNAL_STIMULUS	303	-0.470153	-1.89271	0	0.00390388	0.886
GO_RESPONSE_TO_BMP	136	-0.504282	-1.89262	0	0.00390451	0.886
GO_REGULATION_OF_CALCIUM_ION_TRANSPORT	200	-0.489349	-1.89237	0	0.00390866	0.888
HP_LONG_FINGERS	197	-0.486857	-1.89232	0	0.00390407	0.888
GO_REGULATION_OF_TRANS_SYNAPTIC_SIGNALING	380	-0.465052	-1.89225	0	0.00390127	0.888
GO_LAMELLIPODIUM_MEMBRANE	21	-0.69737	-1.89151	0	0.0039453	0.889
HP_EXTERNAL_OPHTHALMOPLEGIA	57	-0.572855	-1.8914	0	0.00394761	0.889
GO_SMOOTH_MUSCLE_CELL_DIFFERENTIATION	58	-0.568851	-1.89132	0	0.00394125	0.889
HP_PROGRESSIVE_PROXIMAL_MUSCLE_WEAKNESS	22	-0.688847	-1.89088	0	0.00397641	0.892
HP_HYPERVENTILATION	28	-0.660109	-1.89084	0	0.00397174	0.892
GO_CELL_COMMUNICATION_BY_ELECTRICAL_COUPLING_INVOLVED_IN_CARDIAC_CONDUCTION	22	-0.685503	-1.89075	0	0.00397056	0.892
GO_REGULATION_OF_HEART_GROWTH	66	-0.553547	-1.89043	0	0.00397794	0.893
GO_PEPTIDE_CROSS_LINKING	21	-0.696959	-1.89043	0	0.00397158	0.893
GO_REGULATION_OF_TRANSMEMBRANE_RECEPTOR_PROTEIN_SERINE_THREONINE_KINASE_SIGNALING_PATHWAY	210	-0.484269	-1.8904	0	0.00396698	0.893
GO_METAPHASE_ANAPHASE_TRANSITION_OF_CELL_CYCLE	58	-0.565338	-1.88981	0	0.00399145	0.896
GO_REGULATION_OF_BIOMINERALIZATION	78	-0.548981	-1.88942	0	0.00402605	0.901
GO_REGULATION_OF_MYELINATION	40	-0.614103	-1.88903	0	0.00404704	0.904
GO_REGULATION_OF_CHROMOSOME_SEPARATION	63	-0.558804	-1.88871	0	0.00406786	0.904
HP_ABNORMAL_BRAIN_LACTATE_LEVEL_BY_MRS	20	-0.715945	-1.88853	0	0.00407333	0.904
HP_INTESTINAL_MALROTATION	78	-0.543646	-1.88852	0	0.00406858	0.905
GO_NEGATIVE_REGULATION_OF_ORGAN_GROWTH	34	-0.615041	-1.88851	0.00149031	0.00406217	0.905
GO_REGULATION_OF_ANATOMICAL_STRUCTURE_SIZE	449	-0.455671	-1.88779	0	0.00410992	0.909
GO_NEGATIVE_REGULATION_OF_PROTEIN_POLYMERIZATION	69	-0.553642	-1.88776	0	0.00410514	0.909
GO_REGULATION_OF_WNT_SIGNALING_PATHWAY	338	-0.466027	-1.88756	0	0.00411392	0.91
GO_CONDENSED_CHROMOSOME	204	-0.481545	-1.8874	0	0.00411589	0.91
GO_SULFUR_COMPOUND_CATABOLIC_PROCESS	48	-0.577934	-1.88739	0	0.00411114	0.91
GO_GRANULOCYTE_MIGRATION	105	-0.523122	-1.88695	0	0.00413328	0.91
GO_GLUTAMATERGIC_SYNAPSE	312	-0.466194	-1.88695	0	0.00412683	0.91
GO_CELLULAR_RESPONSE_TO_OSMOTIC_STRESS	40	-0.609076	-1.88651	0.00146413	0.00413878	0.913
GO_BIOMINERALIZATION	128	-0.506268	-1.88615	0	0.00415742	0.915
GO_CARDIAC_MYOFIBRIL_ASSEMBLY	17	-0.731127	-1.88547	0	0.00419441	0.918
GO_REGULATION_OF_HIGH_VOLTAGE_GATED_CALCIUM_CHANNEL_ACTIVITY	13	-0.779574	-1.88508	0.00158228	0.00421792	0.919
HP_TRISMUS	12	-0.780318	-1.88503	0	0.00421139	0.919
GO_AORTIC_VALVE_DEVELOPMENT	32	-0.63092	-1.88423	0	0.00427465	0.922
GO_POSTSYNAPSE_ASSEMBLY	26	-0.661269	-1.88403	0	0.00428462	0.923
GO_REGULATION_OF_MEMBRANE_POTENTIAL	354	-0.460323	-1.88393	0	0.00428134	0.923
GO_NEGATIVE_REGULATION_OF_LEUKOCYTE_MIGRATION	35	-0.619248	-1.88377	0.00143472	0.00428794	0.924
GO_OXIDOREDUCTASE_ACTIVITY_ACTING_ON_THE_CH_NH2_GROUP_OF_DONORS	17	-0.731835	-1.88367	0	0.00429124	0.924
GO_POSITIVE_REGULATION_OF_EPITHELIAL_CELL_PROLIFERATION	165	-0.496538	-1.8835	0	0.00429291	0.924
HP_ABNORMAL_PR_INTERVAL	12	-0.793319	-1.88348	0	0.00428962	0.925
HP_RAGGED_RED_MUSCLE_FIBERS	55	-0.567359	-1.88337	0.00136799	0.00428797	0.926
GO_COLLAGEN_BIOSYNTHETIC_PROCESS	42	-0.606088	-1.8832	0	0.00428967	0.926
GO_NEGATIVE_REGULATION_OF_PEPTIDE_SECRETION	85	-0.530314	-1.88235	0	0.0043618	0.933
HP_ABNORMAL_SCLERA_MORPHOLOGY	92	-0.532702	-1.88142	0	0.00442884	0.936
GO_EXTERNAL_SIDE_OF_PLASMA_MEMBRANE	251	-0.47398	-1.88078	0	0.0044564	0.938
GO_REGULATION_OF_CELL_DEVELOPMENT	825	-0.446343	-1.88033	0	0.00447401	0.938
GO_TRANSFORMING_GROWTH_FACTOR_BETA_RECEPTOR_SIGNALING_PATHWAY	174	-0.486789	-1.8803	0	0.00446885	0.938
HP_ABNORMAL_LEFT_ATRIUM_MORPHOLOGY	10	-0.813668	-1.88014	0	0.0044702	0.938
GO_ENDOTHELIAL_CELL_APOPTOTIC_PROCESS	46	-0.589353	-1.88005	0	0.00446669	0.938
HP_PERIPHERAL_DEMYELINATION	44	-0.595568	-1.87997	0	0.00446157	0.938
GO_LACTATION	42	-0.597258	-1.87886	0	0.00454223	0.939
GO_PROTEOGLYCAN_BIOSYNTHETIC_PROCESS	58	-0.559321	-1.87848	0	0.00456115	0.941
HP_ABNORMAL_CARDIAC_TEST	90	-0.534587	-1.87807	0	0.0045752	0.941
GO_REGULATION_OF_NERVOUS_SYSTEM_DEVELOPMENT	807	-0.445415	-1.8776	0	0.00460052	0.944
GO_CELL_DIVISION_SITE	56	-0.577605	-1.87742	0	0.00460003	0.944
HP_EXERCISE_INTOLERANCE	84	-0.529405	-1.8774	0	0.00459956	0.945
GO_VOLTAGE_GATED_POTASSIUM_CHANNEL_ACTIVITY	64	-0.567325	-1.87735	0	0.00459588	0.945
GO_ACTIN_FILAMENT_SEVERING	16	-0.746617	-1.87663	0	0.00464837	0.947
GO_LEADING_EDGE_MEMBRANE	157	-0.491166	-1.87631	0	0.00466066	0.947
GO_NEGATIVE_REGULATION_OF_METAPHASE_ANAPHASE_TRANSITION_OF_CELL_CYCLE	36	-0.602319	-1.87629	0.00144928	0.00465533	0.947
GO_REGULATION_OF_RESPIRATORY_GASEOUS_EXCHANGE_BY_NERVOUS_SYSTEM_PROCESS	10	-0.822006	-1.87552	0	0.00470884	0.949
HP_PROGRESSIVE_SENSORINEURAL_HEARING_IMPAIRMENT	33	-0.628725	-1.87546	0	0.00470664	0.951
HP_EMG_ABNORMALITY	228	-0.473891	-1.87525	0	0.00471557	0.953
GO_POSITIVE_REGULATION_OF_FIBROBLAST_PROLIFERATION	46	-0.587059	-1.87521	0	0.00470861	0.953
GO_NEGATIVE_REGULATION_OF_DEVELOPMENTAL_GROWTH	99	-0.526023	-1.87507	0	0.00471111	0.953
GO_POSITIVE_REGULATION_OF_HEART_CONTRACTION	32	-0.637511	-1.87474	0	0.00472633	0.955
GO_CELL_LEADING_EDGE	393	-0.459637	-1.87443	0	0.00474149	0.956
HP_STRIAE_DISTENSAE	21	-0.690691	-1.87428	0	0.00475187	0.957
GO_REGULATION_OF_WOUND_HEALING	119	-0.511395	-1.87402	0	0.00476067	0.957
GO_ANGIOGENESIS_INVOLVED_IN_WOUND_HEALING	24	-0.667881	-1.87315	0.00152672	0.00482289	0.958
GO_POTASSIUM_CHANNEL_COMPLEX	72	-0.54471	-1.87299	0	0.00482837	0.958
GO_FILOPODIUM_ASSEMBLY	56	-0.556479	-1.87264	0.00135501	0.00483697	0.958
GO_REGULATION_OF_LEUKOCYTE_DIFFERENTIATION	240	-0.475825	-1.87227	0	0.00486434	0.959
GO_REGULATION_OF_SYSTEMIC_ARTERIAL_BLOOD_PRESSURE_BY_HORMONE	26	-0.6534	-1.87214	0.00300752	0.00486977	0.959
GO_CHROMOSOME_SEGREGATION	313	-0.462217	-1.87166	0	0.00490942	0.96
GO_EPHRIN_RECEPTOR_ACTIVITY	16	-0.731731	-1.87113	0.00480769	0.00495537	0.962
GO_FIBRINOLYSIS	18	-0.709307	-1.87097	0	0.00495753	0.962
GO_REGULATION_OF_T_CELL_ACTIVATION	261	-0.470362	-1.87049	0	0.00499082	0.965
GO_CELL_MORPHOGENESIS	921	-0.441012	-1.87035	0	0.00499915	0.966
HP_JOINT_STIFFNESS	152	-0.49011	-1.86947	0	0.00505694	0.968
GO_NEGATIVE_REGULATION_OF_CELLULAR_RESPONSE_TO_VASCULAR_ENDOTHELIAL_GROWTH_FACTOR_STIMULUS	13	-0.771855	-1.86922	0.00164745	0.00506511	0.968
GO_MEMBRANE_RAFT_ORGANIZATION	21	-0.674804	-1.86902	0	0.00507336	0.968
GO_NEURONAL_STEM_CELL_POPULATION_MAINTENANCE	21	-0.694075	-1.86877	0	0.00508146	0.969
GO_INTERCALATED_DISC	48	-0.585802	-1.86844	0	0.00510346	0.969
GO_ENDOTHELIAL_CELL_CHEMOTAXIS	24	-0.659815	-1.86841	0.00309598	0.00509768	0.969
GO_CELL_DIVISION	554	-0.447656	-1.86745	0	0.00516091	0.971
GO_POSITIVE_REGULATION_OF_PEPTIDYL_THREONINE_PHOSPHORYLATION	27	-0.655345	-1.8671	0.00152672	0.00518116	0.972
GO_POSITIVE_REGULATION_OF_PROTEIN_KINASE_B_SIGNALING	140	-0.493782	-1.86698	0	0.00518296	0.972
HP_HYPEREXTENSIBLE_SKIN	54	-0.572964	-1.86657	0	0.00520614	0.973
GO_POSITIVE_REGULATION_OF_PHOSPHATIDYLINOSITOL_3_KINASE_SIGNALING	74	-0.538597	-1.86637	0	0.00522011	0.973
GO_INTRINSIC_COMPONENT_OF_SYNAPTIC_MEMBRANE	118	-0.508236	-1.86618	0	0.00522031	0.974
GO_POSITIVE_REGULATION_OF_NERVOUS_SYSTEM_DEVELOPMENT	461	-0.456147	-1.86608	0	0.00522051	0.974
GO_ARYLSULFATASE_ACTIVITY	12	-0.773235	-1.86587	0	0.00523594	0.975
GO_NEGATIVE_REGULATION_OF_SMOOTH_MUSCLE_CELL_MIGRATION	19	-0.707545	-1.86541	0	0.0052604	0.975
HP_DISTAL_PERIPHERAL_SENSORY_NEUROPATHY	19	-0.695543	-1.86507	0	0.00527872	0.976
HP_ABNORMALITY_OF_COMPLEMENT_SYSTEM	22	-0.688038	-1.86444	0	0.00532578	0.98
GO_NERVE_DEVELOPMENT	64	-0.552146	-1.86399	0	0.00536677	0.981
GO_REGULATION_OF_SYNAPTIC_PLASTICITY	158	-0.486512	-1.86382	0	0.00537135	0.981
GO_LIVER_MORPHOGENESIS	19	-0.707799	-1.86373	0	0.00537433	0.981
GO_REGULATION_OF_T_CELL_DIFFERENTIATION_IN_THYMUS	23	-0.667837	-1.86331	0	0.00539687	0.982
GO_NUCLEAR_CHROMOSOME_SEGREGATION	254	-0.470609	-1.86303	0	0.00541641	0.982
HP_ABNORMAL_MORPHOLOGY_OF_THE_MUSCULATURE_OF_THE_NECK	44	-0.58173	-1.86277	0	0.00542683	0.982
GO_NEGATIVE_REGULATION_OF_NEURON_DIFFERENTIATION	189	-0.474262	-1.86268	0	0.00542523	0.982
GO_REGULATION_OF_INTEGRIN_ACTIVATION	11	-0.79538	-1.86235	0.00167504	0.00543866	0.982
GO_REGULATION_OF_PEPTIDYL_THREONINE_PHOSPHORYLATION	42	-0.581515	-1.86175	0.0013624	0.00547746	0.983
GO_REGULATION_OF_GRANULOCYTE_CHEMOTAXIS	43	-0.590258	-1.86174	0	0.00546984	0.983
HP_DELAYED_CRANIAL_SUTURE_CLOSURE	59	-0.553442	-1.8616	0	0.00547271	0.983
HP_CONTRACTURES_OF_THE_JOINTS_OF_THE_UPPER_LIMBS	232	-0.470884	-1.86128	0	0.00549041	0.983
GO_REGULATION_OF_GLIOGENESIS	98	-0.521879	-1.86084	0	0.00552749	0.983
HP_INCREASED_BLOOD_PRESSURE	324	-0.460207	-1.8608	0	0.00552429	0.983
GO_INTRAMEMBRANE_LIPID_TRANSPORTER_ACTIVITY	18	-0.706756	-1.86034	0.0015625	0.00555371	0.983
GO_POSITIVE_REGULATION_OF_CELL_DIFFERENTIATION	864	-0.44243	-1.86007	0	0.00556686	0.983
GO_TRANSMEMBRANE_RECEPTOR_PROTEIN_TYROSINE_KINASE_SIGNALING_PATHWAY	648	-0.443889	-1.85906	0	0.00562133	0.983
GO_ESTROUS_CYCLE	12	-0.767803	-1.8589	0	0.00562097	0.983
HP_DERMAL_ATROPHY	76	-0.531281	-1.85889	0	0.00561324	0.983
GO_TRANSMEMBRANE_RECEPTOR_PROTEIN_SERINE_THREONINE_KINASE_SIGNALING_PATHWAY	299	-0.464524	-1.85837	0	0.00564242	0.983
GO_HEART_GROWTH	88	-0.526708	-1.85828	0	0.00565529	0.983
HP_ABNORMALITY_OF_THE_METOPIC_SUTURE	49	-0.573653	-1.85827	0	0.00565051	0.983
GO_POSITIVE_REGULATION_OF_SODIUM_ION_TRANSMEMBRANE_TRANSPORT	20	-0.693654	-1.85818	0.00318471	0.00564718	0.983
GO_PROTEIN_TYROSINE_KINASE_ACTIVATOR_ACTIVITY	18	-0.700758	-1.85809	0.00161551	0.00565412	0.983
GO_HIPPO_SIGNALING	43	-0.581025	-1.85805	0	0.00564789	0.983
GO_CATION_CHANNEL_ACTIVITY	262	-0.464259	-1.85798	0	0.00564461	0.983
GO_PROTEIN_OXIDATION	14	-0.760211	-1.85778	0	0.00564859	0.983
GO_ESTABLISHMENT_OF_LYMPHOCYTE_POLARITY	10	-0.825719	-1.85767	0	0.00565111	0.983
GO_POTASSIUM_ION_TRANSMEMBRANE_TRANSPORTER_ACTIVITY	114	-0.507354	-1.85754	0	0.00565364	0.983
HP_ABNORMALITY_OF_PRIMARY_TEETH	44	-0.582519	-1.85727	0	0.0056634	0.984
GO_NEGATIVE_REGULATION_OF_FIBROBLAST_GROWTH_FACTOR_RECEPTOR_SIGNALING_PATHWAY	19	-0.696038	-1.8571	0.00310078	0.00567173	0.984
GO_GLIAL_CELL_DEVELOPMENT	100	-0.512455	-1.85702	0	0.00567423	0.984
GO_NEGATIVE_REGULATION_OF_ACTIN_FILAMENT_POLYMERIZATION	57	-0.558625	-1.85678	0	0.00569119	0.986
GO_REGULATION_OF_GLIAL_CELL_DIFFERENTIATION	61	-0.550744	-1.85641	0	0.00571099	0.986
HP_BRADYCARDIA	51	-0.56972	-1.85615	0	0.00572208	0.986
GO_SEMI_LUNAR_VALVE_DEVELOPMENT	36	-0.605828	-1.85604	0	0.0057288	0.987
GO_PEPTIDASE_ACTIVATOR_ACTIVITY	38	-0.606791	-1.85512	0	0.00579024	0.987
GO_REGULATION_OF_ACTIN_FILAMENT_BUNDLE_ASSEMBLY	94	-0.523786	-1.85462	0	0.00581699	0.987
GO_DNA_REPLICATION_INDEPENDENT_NUCLEOSOME_ORGANIZATION	38	-0.598962	-1.85446	0	0.00583653	0.987
HP_ABNORMALITY_OF_THE_ELBOW	194	-0.476893	-1.85432	0	0.0058445	0.987
GO_REGULATION_OF_RELEASE_OF_SEQUESTERED_CALCIUM_ION_INTO_CYTOSOL	63	-0.547755	-1.85416	0	0.00586104	0.987
GO_POSITIVE_REGULATION_OF_MEMBRANE_PROTEIN_ECTODOMAIN_PROTEOLYSIS	13	-0.753181	-1.85402	0.00167785	0.00586755	0.987
GO_AXON_DEVELOPMENT	458	-0.449182	-1.85361	0	0.00589549	0.987
GO_REGULATION_OF_CELL_MORPHOGENESIS	454	-0.449967	-1.85324	0	0.00592043	0.987
HP_PROMINENT_SUPRAORBITAL_RIDGES	36	-0.613267	-1.85239	0.00144092	0.00596245	0.987
HP_ABNORMAL_METABOLIC_BRAIN_IMAGING_BY_MRS	32	-0.630756	-1.85204	0	0.00599579	0.988
GO_PLASMA_MEMBRANE_RAFT	98	-0.512075	-1.85201	0	0.00598785	0.988
GO_NEGATIVE_REGULATION_OF_LEUKOCYTE_CHEMOTAXIS	13	-0.751622	-1.85144	0	0.00603535	0.988
GO_REGULATION_OF_OLIGODENDROCYTE_DIFFERENTIATION	33	-0.630507	-1.85142	0.00144509	0.00603163	0.988
GO_NEURON_MIGRATION	137	-0.496413	-1.85127	0	0.00603642	0.989
GO_CHROMOSOME_CONDENSATION	30	-0.634836	-1.85117	0.00295421	0.00604403	0.989
HP_SYNCOPE	79	-0.531386	-1.85091	0	0.00606002	0.99
GO_REGULATION_OF_MUSCLE_ORGAN_DEVELOPMENT	124	-0.497651	-1.84993	0	0.00614368	0.991
GO_SYNAPTIC_MEMBRANE	304	-0.459361	-1.84982	0	0.00614407	0.991
GO_INTERFERON_GAMMA_MEDIATED_SIGNALING_PATHWAY	80	-0.530681	-1.84971	0	0.00614586	0.991
GO_REGULATION_OF_CYTOKINE_PRODUCTION_INVOLVED_IN_IMMUNE_RESPONSE	68	-0.537642	-1.84872	0	0.00623331	0.992
GO_PLATELET_ACTIVATION	129	-0.501262	-1.84852	0	0.00624622	0.992
GO_NEGATIVE_REGULATION_OF_NEURON_PROJECTION_DEVELOPMENT	138	-0.490267	-1.84839	0	0.00625209	0.992
GO_OXIDOREDUCTASE_ACTIVITY_ACTING_ON_A_HEME_GROUP_OF_DONORS	26	-0.639631	-1.84808	0.00151745	0.00626631	0.992
GO_REGULATION_OF_ACTIN_CYTOSKELETON_REORGANIZATION	36	-0.608539	-1.84743	0	0.00630835	0.992
HP_HEMIANOPIA	43	-0.586888	-1.84723	0	0.00631271	0.992
HP_ABNORMAL_FINGER_FLEXION_CREASES	11	-0.787748	-1.84718	0.00164204	0.00630868	0.992
GO_TRANSPORTER_COMPLEX	260	-0.462563	-1.8471	0	0.00631022	0.992
GO_POSITIVE_REGULATION_OF_OSSIFICATION	80	-0.52846	-1.84679	0	0.00632568	0.993
GO_POSITIVE_REGULATION_OF_CELL_CELL_ADHESION	223	-0.467426	-1.84639	0	0.00635365	0.994
GO_CONDENSED_NUCLEAR_CHROMOSOME_CENTROMERIC_REGION	31	-0.624753	-1.84593	0	0.00639248	0.994
HP_ABNORMALITY_OF_THE_SPINAL_CORD	260	-0.466256	-1.84559	0	0.00641605	0.995
GO_POSITIVE_REGULATION_OF_ANTIGEN_RECEPTOR_MEDIATED_SIGNALING_PATHWAY	20	-0.696237	-1.84535	0	0.0064368	0.995
HP_PALPITATIONS	64	-0.541886	-1.84387	0	0.00659689	0.996
GO_REGULATION_OF_VASCULAR_PERMEABILITY	41	-0.586382	-1.84352	0	0.00661868	0.996
GO_DETECTION_OF_TEMPERATURE_STIMULUS	22	-0.680246	-1.84295	0.0015361	0.00665555	0.996
GO_AUTONOMIC_NERVOUS_SYSTEM_DEVELOPMENT	35	-0.601072	-1.84263	0.0014771	0.00668005	0.996
GO_GRANULOCYTE_CHEMOTAXIS	92	-0.515933	-1.84248	0	0.00668933	0.996
GO_VOLTAGE_GATED_CALCIUM_CHANNEL_ACTIVITY	35	-0.610923	-1.84227	0	0.00669719	0.996
GO_REGULATION_OF_BMP_SIGNALING_PATHWAY	75	-0.529513	-1.8421	0	0.0067065	0.996
GO_CALCIUM_ION_TRANSMEMBRANE_TRANSPORT	252	-0.463296	-1.84177	0	0.00673763	0.996
HP_ABNORMALITY_OF_THE_MIDDLE_EAR_OSSICLES	11	-0.794294	-1.8415	0.00163132	0.00675502	0.996
GO_POSITIVE_REGULATION_OF_PRODUCTION_OF_MIRNAS_INVOLVED_IN_GENE_SILENCING_BY_MIRNA	10	-0.811105	-1.84137	0.00162602	0.0067655	0.996
GO_L_TYPE_VOLTAGE_GATED_CALCIUM_CHANNEL_COMPLEX	10	-0.792817	-1.84098	0.0015528	0.00679786	0.996
HP_LONG_NOSE	27	-0.639263	-1.83989	0.00157978	0.00690093	0.996
GO_BONE_GROWTH	28	-0.632222	-1.83979	0.00445104	0.0069099	0.996
GO_POSITIVE_REGULATION_OF_CELL_DEVELOPMENT	476	-0.446242	-1.83949	0	0.00693502	0.996
GO_REGULATION_OF_RESPIRATORY_SYSTEM_PROCESS	13	-0.762121	-1.83939	0	0.00693301	0.996
GO_REGENERATION	168	-0.480473	-1.83922	0	0.00694048	0.996
GO_MYOBLAST_FUSION	33	-0.614499	-1.83921	0.00430416	0.00693174	0.996
GO_REGULATION_OF_ATTACHMENT_OF_SPINDLE_MICROTUBULES_TO_KINETOCHORE	13	-0.763737	-1.83854	0.00341297	0.00699189	0.996
GO_AXON_ENSHEATHMENT_IN_CENTRAL_NERVOUS_SYSTEM	16	-0.721958	-1.83794	0.00327869	0.00704257	0.996
HP_ABNORMALITY_OF_THE_SUPRAORBITAL_RIDGES	82	-0.524557	-1.83733	0	0.00710369	0.997
GO_ENSHEATHMENT_OF_NEURONS	122	-0.499145	-1.83712	0	0.00712166	0.997
GO_VASCULAR_ASSOCIATED_SMOOTH_MUSCLE_CELL_DIFFERENTIATION	29	-0.617482	-1.83706	0	0.00712351	0.997
HP_PROLONGED_QTC_INTERVAL	25	-0.633951	-1.83663	0	0.00716428	0.997
GO_POSITIVE_REGULATION_OF_PEPTIDYL_TYROSINE_PHOSPHORYLATION	157	-0.483855	-1.83636	0	0.00718483	0.997
GO_WATER_TRANSPORT	12	-0.770834	-1.8362	0.00159744	0.00718923	0.997
HP_ABNORMALITY_OF_THE_ABDOMINAL_WALL	390	-0.450686	-1.83618	0	0.00718294	0.997
GO_NEURAL_PRECURSOR_CELL_PROLIFERATION	129	-0.493155	-1.8361	0	0.00719007	0.997
GO_POSITIVE_REGULATION_OF_WNT_SIGNALING_PATHWAY	166	-0.47702	-1.83573	0	0.00722114	0.997
GO_POSITIVE_REGULATION_OF_ATPASE_ACTIVITY	51	-0.562118	-1.83542	0.00138889	0.00724557	0.997
HP_INGUINAL_HERNIA	214	-0.46766	-1.8345	0	0.00733102	0.997
GO_ADHERENS_JUNCTION_ORGANIZATION	61	-0.546743	-1.83375	0.00130719	0.00740956	0.998
GO_CELL_COMMUNICATION_INVOLVED_IN_CARDIAC_CONDUCTION	50	-0.560065	-1.83362	0	0.00740969	0.998
GO_NEGATIVE_REGULATION_OF_CELL_ACTIVATION	150	-0.485048	-1.83351	0	0.00740981	0.998
GO_NEGATIVE_REGULATION_OF_IMMUNE_SYSTEM_PROCESS	334	-0.447895	-1.83346	0	0.00740598	0.998
HP_ABNORMAL_MYOCARDIUM_MORPHOLOGY	453	-0.445275	-1.83343	0	0.00740085	0.998
HP_ABNORMAL_MORPHOLOGY_OF_THE_ABDOMINAL_MUSCULATURE	52	-0.564438	-1.83157	0	0.00761109	0.998
GO_REGULATION_OF_PLASMINOGEN_ACTIVATION	11	-0.787299	-1.8315	0	0.00760703	0.998
HP_ABNORMALLY_LAX_OR_HYPEREXTENSIBLE_SKIN	120	-0.493145	-1.83138	0	0.00760959	0.998
GO_REGULATION_OF_MONOCYTE_CHEMOTAXIS	17	-0.704247	-1.83116	0.00327869	0.00763051	0.998
GO_REGULATION_OF_NEURAL_PRECURSOR_CELL_PROLIFERATION	73	-0.532736	-1.83093	0	0.00764614	0.998
GO_STRESS_FIBER_ASSEMBLY	97	-0.508999	-1.83042	0	0.00769974	0.998
GO_ADENYLATE_CYCLASE_INHIBITING_G_PROTEIN_COUPLED_RECEPTOR_SIGNALING_PATHWAY	56	-0.541673	-1.8304	0	0.00769163	0.998
GO_REGULATION_OF_VASOCONSTRICTION	45	-0.579078	-1.83018	0	0.00770452	0.998
GO_GATED_CHANNEL_ACTIVITY	254	-0.459951	-1.83001	0	0.00772133	0.998
GO_EPITHELIAL_CELL_DIFFERENTIATION_INVOLVED_IN_KIDNEY_DEVELOPMENT	42	-0.582537	-1.82933	0.00140056	0.00778376	0.998
GO_NEGATIVE_REGULATION_OF_ION_TRANSPORT	124	-0.489897	-1.8293	0	0.00777431	0.998
GO_TROPOMYOSIN_BINDING	12	-0.780647	-1.82924	0.00516351	0.0077792	0.998
GO_INSULIN_LIKE_GROWTH_FACTOR_I_BINDING	12	-0.775282	-1.82885	0.00166113	0.00781138	0.998
GO_LYMPHOCYTE_COSTIMULATION	44	-0.569965	-1.82846	0.00142248	0.00785131	0.998
GO_POSITIVE_REGULATION_OF_SEQUESTERING_OF_CALCIUM_ION	13	-0.742365	-1.82809	0.00163132	0.00788328	0.998
GO_RESPONSE_TO_CALCIUM_ION	125	-0.495259	-1.82808	0	0.00787635	0.998
GO_CELL_DIFFERENTIATION_INVOLVED_IN_KIDNEY_DEVELOPMENT	52	-0.563692	-1.82792	0.00139082	0.00788113	0.998
HP_FINGERNAIL_DYSPLASIA	11	-0.797258	-1.8273	0	0.00793111	0.998
GO_REGULATORY_T_CELL_DIFFERENTIATION	28	-0.636453	-1.82728	0.00287356	0.00792415	0.998
GO_NEGATIVE_REGULATION_OF_VASCULAR_PERMEABILITY	14	-0.760958	-1.82718	0.00314961	0.00792624	0.998
GO_FIBROBLAST_MIGRATION	43	-0.570988	-1.82648	0	0.00799537	0.998
GO_NEGATIVE_REGULATION_OF_PROTEIN_AUTOPHOSPHORYLATION	12	-0.751597	-1.8263	0.00476947	0.00800252	0.998
GO_OSTEOBLAST_DIFFERENTIATION	188	-0.472221	-1.82564	0	0.0080636	0.998
GO_CHROMOSOME_SEPARATION	90	-0.5164	-1.82541	0	0.00807197	0.998
GO_PRESYNAPTIC_MEMBRANE_ORGANIZATION	11	-0.776278	-1.82401	0.00162866	0.00820987	0.999
HP_RECURRENT_PAROXYSMAL_HEADACHE	32	-0.608274	-1.82381	0.00146843	0.00822188	0.999
HP_SUDDEN_CARDIAC_DEATH	74	-0.520973	-1.8238	0	0.00821338	0.999
GO_FOCAL_ADHESION_ASSEMBLY	81	-0.522992	-1.82373	0.0013245	0.00821131	0.999
GO_POSITIVE_REGULATION_OF_SUPRAMOLECULAR_FIBER_ORGANIZATION	191	-0.468565	-1.82367	0	0.00820535	0.999
GO_KERATINIZATION	63	-0.537463	-1.82354	0	0.00820838	0.999
GO_NEGATIVE_REGULATION_OF_CARDIAC_MUSCLE_TISSUE_GROWTH	26	-0.639812	-1.82287	0.00443131	0.00828013	0.999
GO_CARDIAC_VENTRICLE_DEVELOPMENT	113	-0.496722	-1.82275	0	0.00827922	0.999
HP_HETEROGENEOUS	249	-0.456015	-1.8225	0	0.00829234	0.999
HP_SYNOSTOSIS_OF_CARPALS_TARSALS	37	-0.588595	-1.82224	0.00146199	0.00831552	0.999
GO_POSITIVE_REGULATION_OF_BMP_SIGNALING_PATHWAY	29	-0.630861	-1.82222	0	0.00830697	0.999
GO_POSITIVE_REGULATION_OF_MAPK_CASCADE	458	-0.436995	-1.8216	0	0.00838326	0.999
GO_NEUTROPHIL_MIGRATION	84	-0.520411	-1.82143	0	0.0083936	0.999
GO_ANTIGEN_PROCESSING_AND_PRESENTATION_OF_ENDOGENOUS_PEPTIDE_ANTIGEN	17	-0.706333	-1.82142	0	0.00838499	0.999
GO_EYELID_DEVELOPMENT_IN_CAMERA_TYPE_EYE	11	-0.780613	-1.82103	0.00170358	0.00840917	0.999
HP_MORPHOLOGICAL_ABNORMALITY_OF_THE_MIDDLE_EAR	14	-0.730127	-1.82083	0	0.00841692	0.999
GO_MIDBODY	173	-0.468721	-1.82078	0	0.00841461	0.999
GO_NEGATIVE_REGULATION_OF_ANION_TRANSPORT	29	-0.621495	-1.82055	0	0.00843751	0.999
GO_NEURAL_CREST_CELL_MIGRATION	50	-0.569378	-1.82022	0.00141243	0.00846529	0.999
HP_PROTRUSIO_ACETABULI	10	-0.799923	-1.82015	0.00496689	0.00846293	0.999
GO_PRESYNAPSE_ORGANIZATION	40	-0.580492	-1.82007	0	0.00846305	0.999
GO_CANONICAL_WNT_SIGNALING_PATHWAY	302	-0.452827	-1.81945	0	0.008552	0.999
GO_POSITIVE_REGULATION_OF_TRANSMEMBRANE_TRANSPORT	166	-0.473485	-1.81942	0	0.00854828	0.999
HP_KNEE_FLEXION_CONTRACTURE	65	-0.538481	-1.81882	0.00272851	0.00861946	0.999
GO_REGULATION_OF_PROTEIN_DEPOLYMERIZATION	80	-0.515072	-1.81881	0	0.0086107	0.999
GO_TRANS_SYNAPTIC_SIGNALING_MODULATING_SYNAPTIC_TRANSMISSION	14	-0.75686	-1.81878	0.00157233	0.00860196	0.999
GO_MACROPHAGE_CYTOKINE_PRODUCTION	15	-0.724181	-1.81822	0	0.00865913	0.999
HP_DILATATION	147	-0.480787	-1.81804	0	0.00866149	0.999
HP_CARDIAC_ARREST	104	-0.498715	-1.81787	0	0.00867754	0.999
GO_CORNIFICATION	49	-0.559375	-1.81783	0	0.00867	0.999
GO_NEGATIVE_REGULATION_OF_WOUND_HEALING	59	-0.542911	-1.81771	0.00134953	0.00867611	0.999
GO_DEVELOPMENTAL_GROWTH	576	-0.438623	-1.81749	0	0.00869582	0.999
GO_SYNAPSE_MATURATION	20	-0.683113	-1.81725	0	0.00871543	0.999
GO_PASSIVE_TRANSMEMBRANE_TRANSPORTER_ACTIVITY	360	-0.442947	-1.81702	0	0.00874484	0.999
HP_MANIA	37	-0.608046	-1.81691	0	0.00874589	0.999
GO_RETINOIC_ACID_METABOLIC_PROCESS	22	-0.670825	-1.81689	0	0.00873709	0.999
HP_POLYNEUROPATHY	50	-0.560445	-1.81635	0.00285714	0.00879481	0.999
HP_POSTURAL_TREMOR	48	-0.555653	-1.81623	0.00143472	0.00880436	0.999
GO_SYNCYTIUM_FORMATION	46	-0.554999	-1.81619	0	0.00880292	0.999
GO_REGULATION_OF_PHOSPHATIDYLINOSITOL_3_KINASE_SIGNALING	107	-0.4997	-1.81615	0	0.00879898	0.999
GO_REGULATION_OF_MAPK_CASCADE	615	-0.435342	-1.81615	0	0.00878895	0.999
HP_ABNORMAL_MITRAL_VALVE_PHYSIOLOGY	113	-0.498165	-1.81543	0	0.00886082	0.999
GO_NEGATIVE_REGULATION_OF_CELLULAR_RESPONSE_TO_GROWTH_FACTOR_STIMULUS	146	-0.477401	-1.81533	0	0.00885804	0.999
GO_EPITHELIAL_TO_MESENCHYMAL_TRANSITION_INVOLVED_IN_ENDOCARDIAL_CUSHION_FORMATION	17	-0.690329	-1.81443	0	0.00897974	0.999
GO_PEPTIDASE_REGULATOR_ACTIVITY	164	-0.476848	-1.81443	0	0.00896954	0.999
GO_SEGMENTATION	81	-0.521371	-1.81428	0	0.00898251	0.999
GO_MEMBRANE_RAFT_ASSEMBLY	10	-0.811759	-1.81391	0.00166945	0.00901249	0.999
GO_NEGATIVE_REGULATION_OF_RESPONSE_TO_WOUNDING	72	-0.535235	-1.81388	0	0.00900472	0.999
GO_REGULATION_OF_RHO_PROTEIN_SIGNAL_TRANSDUCTION	77	-0.516687	-1.81359	0	0.00903091	0.999
GO_RESPONSE_TO_MUSCLE_STRETCH	17	-0.691464	-1.81342	0.00162602	0.00903526	0.999
GO_PROTEIN_LOCALIZATION_TO_CELL_CELL_JUNCTION	13	-0.750288	-1.81271	0.00162338	0.00911702	1
HP_ATROPHIC_SCARS	27	-0.630494	-1.81153	0.00149254	0.0092906	1
GO_MATURE_B_CELL_DIFFERENTIATION	22	-0.661941	-1.81152	0	0.00928256	1
GO_PSEUDOPODIUM	17	-0.698088	-1.81143	0.00311042	0.00928657	1
GO_KERATAN_SULFATE_BIOSYNTHETIC_PROCESS	26	-0.631541	-1.81091	0	0.00932679	1
GO_BONE_DEVELOPMENT	179	-0.470796	-1.81082	0	0.009326	1
HP_WADDLING_GAIT	95	-0.500961	-1.81017	0	0.0094082	1
GO_REGULATION_OF_RYANODINE_SENSITIVE_CALCIUM_RELEASE_CHANNEL_ACTIVITY	23	-0.664313	-1.81011	0.00317965	0.00940247	1
GO_REGULATION_OF_CELLULAR_RESPONSE_TO_TRANSFORMING_GROWTH_FACTOR_BETA_STIMULUS	115	-0.494093	-1.81009	0	0.00939436	1
GO_KERATAN_SULFATE_METABOLIC_PROCESS	31	-0.599761	-1.80987	0	0.00940307	1
GO_POSITIVE_REGULATION_OF_SYNAPTIC_TRANSMISSION	142	-0.486598	-1.80978	0	0.00940337	1
GO_MAMMARY_GLAND_DEVELOPMENT	126	-0.481147	-1.80948	0	0.00943719	1
HP_RETINAL_ARTERIOLAR_TORTUOSITY	22	-0.659791	-1.8094	0.00297619	0.00943624	1
GO_REGULATION_OF_CELL_CELL_ADHESION	342	-0.446993	-1.8092	0	0.00945558	1
GO_REGULATION_OF_ORGAN_GROWTH	94	-0.505393	-1.80909	0	0.00946535	1
GO_CELLULAR_CARBOHYDRATE_BIOSYNTHETIC_PROCESS	78	-0.52086	-1.80869	0	0.00950369	1
GO_NEURON_TO_NEURON_SYNAPSE	326	-0.443414	-1.8085	0	0.00952294	1
HP_ABNORMAL_MUSCLE_FIBER_MORPHOLOGY	204	-0.463294	-1.80802	0	0.0095647	1
GO_POSITIVE_REGULATION_OF_CATION_CHANNEL_ACTIVITY	58	-0.539978	-1.80732	0.00134589	0.0096348	1
GO_OVULATION_CYCLE	58	-0.547301	-1.80713	0.00140647	0.00964907	1
GO_NEGATIVE_REGULATION_OF_SUBSTRATE_ADHESION_DEPENDENT_CELL_SPREADING	13	-0.735079	-1.807	0	0.00965029	1
GO_ASSOCIATIVE_LEARNING	61	-0.541245	-1.80697	0	0.0096456	1
GO_STRUCTURAL_CONSTITUENT_OF_CYTOSKELETON	82	-0.50923	-1.80688	0.00131752	0.00964448	1
HP_RETROGNATHIA	226	-0.459827	-1.80687	0	0.00963507	1
GO_DIVALENT_INORGANIC_CATION_HOMEOSTASIS	396	-0.441047	-1.80664	0	0.00964571	1
GO_NEGATIVE_REGULATION_OF_SPROUTING_ANGIOGENESIS	32	-0.599973	-1.80557	0	0.0097869	1
HP_MUSCLE_ABNORMALITY_RELATED_TO_MITOCHONDRIAL_DYSFUNCTION	77	-0.526172	-1.8051	0.00128041	0.00983269	1
GO_NEGATIVE_REGULATION_OF_FAT_CELL_DIFFERENTIATION	44	-0.568232	-1.80493	0	0.00985012	1
GO_MITOTIC_METAPHASE_PLATE_CONGRESSION	47	-0.565703	-1.80445	0.0013624	0.00991323	1
GO_RESPIRASOME	96	-0.502625	-1.80439	0	0.0099153	1
HP_NEPHROPATHY	95	-0.501933	-1.80349	0.00126582	0.0100449	1
GO_GANGLION_DEVELOPMENT	12	-0.775366	-1.80279	0.00161551	0.0101217	1
GO_MORPHOGENESIS_OF_AN_EPITHELIUM	491	-0.431766	-1.80215	0	0.0102007	1
GO_CELL_CELL_ADHESION_MEDIATED_BY_INTEGRIN	14	-0.736953	-1.80199	0.00507614	0.0102118	1
GO_NEGATIVE_REGULATION_OF_CARDIAC_MUSCLE_CELL_PROLIFERATION	15	-0.722409	-1.80022	0.00153374	0.0104501	1
HP_CONTRACTURES_INVOLVING_THE_JOINTS_OF_THE_FEET	52	-0.548463	-1.79982	0	0.0105074	1
GO_NEGATIVE_REGULATION_OF_POTASSIUM_ION_TRANSMEMBRANE_TRANSPORT	22	-0.643217	-1.79958	0.0015528	0.0105414	1
GO_SODIUM_ION_HOMEOSTASIS	36	-0.588597	-1.79956	0	0.0105416	1
GO_U4_SNRNP	13	-0.734644	-1.7992	0	0.0105894	1
GO_MAIN_AXON	62	-0.531392	-1.7983	0	0.0106998	1
HP_PANCREATITIS	69	-0.525596	-1.79807	0	0.0107288	1
HP_PREMATURE_LOSS_OF_PRIMARY_TEETH	17	-0.686368	-1.79802	0.00313972	0.0107219	1
GO_SERINE_TYPE_ENDOPEPTIDASE_INHIBITOR_ACTIVITY	61	-0.534606	-1.79783	0	0.0107323	1
GO_RESPONSE_TO_VITAMIN	77	-0.52501	-1.79741	0	0.0107842	1
GO_VENTRICULAR_CARDIAC_MUSCLE_CELL_DEVELOPMENT	10	-0.783805	-1.79687	0.00330033	0.0108488	1
HP_DEVELOPMENTAL_CATARACT	84	-0.506853	-1.79564	0	0.0110042	1
GO_POSITIVE_REGULATION_OF_CANONICAL_WNT_SIGNALING_PATHWAY	136	-0.477961	-1.7956	0	0.010997	1
GO_PHOSPHATIDYLSERINE_BINDING	49	-0.556209	-1.79541	0.00138313	0.0110083	1
GO_CYTOKINE_ACTIVITY	142	-0.479201	-1.79523	0	0.0110309	1
GO_REGULATION_OF_SPROUTING_ANGIOGENESIS	74	-0.520055	-1.7951	0.00129199	0.0110341	1
GO_LONG_TERM_SYNAPTIC_POTENTIATION	70	-0.529937	-1.79504	0	0.011028	1
GO_SENSORY_PERCEPTION_OF_TEMPERATURE_STIMULUS	22	-0.656135	-1.79474	0.00306748	0.0110655	1
HP_ABNORMAL_ELASTICITY_OF_SKIN	161	-0.463188	-1.79458	0	0.0110789	1
HP_FACIAL_ASYMMETRY	113	-0.488389	-1.79447	0	0.0110831	1
GO_CELL_MORPHOGENESIS_INVOLVED_IN_DIFFERENTIATION	664	-0.427877	-1.79416	0	0.0111204	1
GO_OLIGODENDROCYTE_DEVELOPMENT	36	-0.595282	-1.79362	0.00293686	0.0111997	1
GO_NEUTROPHIL_CHEMOTAXIS	72	-0.523328	-1.79292	0	0.0112982	1
GO_NEGATIVE_REGULATION_OF_TRANSPORT	384	-0.439969	-1.7927	0	0.0113124	1
GO_RESPIRATORY_ELECTRON_TRANSPORT_CHAIN	110	-0.489642	-1.79266	0	0.0113083	1
GO_ACTIN_CYTOSKELETON_REORGANIZATION	97	-0.501135	-1.79238	0	0.011344	1
HP_ELEVATED_SYSTOLIC_BLOOD_PRESSURE	11	-0.769353	-1.79235	0.00500835	0.0113355	1
GO_BRANCHING_INVOLVED_IN_BLOOD_VESSEL_MORPHOGENESIS	31	-0.596645	-1.79189	0.00146628	0.0114005	1
GO_EXTRACELLULAR_MATRIX_DISASSEMBLY	64	-0.540005	-1.7908	0	0.011556	1
GO_REGULATION_OF_MEMBRANE_REPOLARIZATION	30	-0.617002	-1.79072	0	0.0115495	1
HP_ABNORMAL_TRICUSPID_VALVE_PHYSIOLOGY	38	-0.578259	-1.79065	0.00140647	0.0115453	1
GO_RESPONSE_TO_ALCOHOL	196	-0.458889	-1.79029	0	0.011603	1
GO_NEGATIVE_REGULATION_OF_ORGANIC_ACID_TRANSPORT	22	-0.655211	-1.79008	0.00623053	0.0116201	1
GO_REGULATION_OF_NEUTROPHIL_MIGRATION	33	-0.597962	-1.78978	0.00145985	0.0116597	1
HP_PALPEBRAL_EDEMA	26	-0.620208	-1.78942	0.00573888	0.0117183	1
GO_DETECTION_OF_ABIOTIC_STIMULUS	112	-0.486943	-1.78891	0	0.0117791	1
GO_POSITIVE_REGULATION_OF_CALCIUM_MEDIATED_SIGNALING	32	-0.608858	-1.78879	0	0.0117859	1
GO_POSITIVE_REGULATION_OF_FILOPODIUM_ASSEMBLY	27	-0.61025	-1.78877	0.0030722	0.0117781	1
HP_ELEVATED_DIASTOLIC_BLOOD_PRESSURE	12	-0.75402	-1.78845	0.00331126	0.0118139	1
HP_ABNORMAL_SYSTEMIC_BLOOD_PRESSURE	375	-0.434642	-1.78799	0	0.0118855	1
GO_POSITIVE_REGULATION_OF_CELL_JUNCTION_ASSEMBLY	81	-0.513065	-1.78769	0.00126582	0.0119156	1
GO_REGULATION_OF_ATPASE_ACTIVITY	72	-0.52076	-1.78726	0.00129366	0.0119612	1
GO_CYTOKINE_PRODUCTION_INVOLVED_IN_IMMUNE_RESPONSE	86	-0.512709	-1.78719	0	0.0119566	1
GO_REGULATION_OF_HEART_RATE	85	-0.50735	-1.78702	0	0.0119732	1
HP_ABNORMALITY_OF_THE_HALLUX	125	-0.476823	-1.78646	0	0.012052	1
GO_ROOF_OF_MOUTH_DEVELOPMENT	83	-0.512621	-1.78639	0	0.0120473	1
HP_SUPERNUMERARY_BONES_OF_THE_AXIAL_SKELETON	22	-0.638488	-1.78639	0.00158228	0.0120348	1
GO_HOMOPHILIC_CELL_ADHESION_VIA_PLASMA_MEMBRANE_ADHESION_MOLECULES	145	-0.473596	-1.78564	0	0.0121622	1
HP_MALNUTRITION	23	-0.654099	-1.78528	0.00443787	0.0122084	1
HP_HYPOGONADOTROPIC_HYPOGONADISM	118	-0.486484	-1.78505	0	0.0122367	1
GO_ANTIGEN_PROCESSING_AND_PRESENTATION_OF_ENDOGENOUS_ANTIGEN	20	-0.666258	-1.78472	0.00316957	0.0122805	1
GO_POSITIVE_REGULATION_OF_MYOBLAST_DIFFERENTIATION	16	-0.691961	-1.78442	0	0.0123032	1
HP_TYPE_1_MUSCLE_FIBER_ATROPHY	14	-0.737402	-1.7844	0.00164474	0.012295	1
GO_REGULATION_OF_CIRCADIAN_SLEEP_WAKE_CYCLE	12	-0.746958	-1.78349	0.00821018	0.0124367	1
HP_ABNORMAL_ATRIOVENTRICULAR_VALVE_PHYSIOLOGY	132	-0.479255	-1.7833	0	0.0124602	1
GO_ERK1_AND_ERK2_CASCADE	247	-0.448169	-1.78315	0	0.0124673	1
HP_ABNORMAL_HEART_VALVE_PHYSIOLOGY	257	-0.443726	-1.78167	0	0.0126941	1
HP_ABNORMAL_ELECTROPHYSIOLOGY_OF_SINOATRIAL_NODE_ORIGIN	61	-0.527768	-1.78162	0.00275862	0.0126877	1
GO_NEGATIVE_REGULATION_OF_ENDOTHELIAL_CELL_PROLIFERATION	37	-0.582854	-1.78162	0.00283286	0.0126758	1
GO_ACTIN_DEPENDENT_ATPASE_ACTIVITY	21	-0.656232	-1.78083	0.00470958	0.0127977	1
HP_FLEXION_CONTRACTURE_OF_DIGIT	255	-0.449644	-1.78076	0	0.0127945	1
GO_CALCIUM_MEDIATED_SIGNALING	173	-0.466057	-1.78069	0	0.0127946	1
GO_REGULATION_OF_CELL_MORPHOGENESIS_INVOLVED_IN_DIFFERENTIATION	284	-0.444508	-1.78068	0	0.0127849	1
GO_NEGATIVE_REGULATION_OF_CHROMOSOME_SEGREGATION	43	-0.566151	-1.78064	0	0.0127817	1
GO_HEART_MORPHOGENESIS	218	-0.455494	-1.77967	0	0.0129399	1
GO_POSITIVE_REGULATION_OF_ALCOHOL_BIOSYNTHETIC_PROCESS	16	-0.701813	-1.77966	0	0.01293	1
HP_SYNOSTOSIS_INVOLVING_BONES_OF_THE_LOWER_LIMBS	24	-0.642292	-1.77944	0	0.0129594	1
GO_S100_PROTEIN_BINDING	13	-0.719627	-1.77936	0.00616333	0.0129648	1
GO_NEGATIVE_REGULATION_OF_WNT_SIGNALING_PATHWAY	200	-0.455515	-1.77931	0	0.0129571	1
GO_RESPONSE_TO_MAGNESIUM_ION	16	-0.693817	-1.77901	0.00311042	0.012996	1
GO_MUSCLE_ALPHA_ACTININ_BINDING	14	-0.724007	-1.77873	0.0033557	0.013036	1
GO_NOREPINEPHRINE_TRANSPORT	15	-0.715968	-1.77742	0.0033557	0.0132566	1
GO_REGULATION_OF_SYNAPSE_MATURATION	11	-0.750881	-1.7774	0.00506757	0.0132454	1
HP_POOR_WOUND_HEALING	17	-0.700073	-1.77699	0.0032	0.013311	1
HP_ABNORMAL_SPEECH_PROSODY	22	-0.660975	-1.77687	0.00157729	0.0133127	1
HP_CHILDHOOD_ONSET_SENSORINEURAL_HEARING_IMPAIRMENT	14	-0.716511	-1.77679	0.00321543	0.0133134	1
GO_REGULATION_OF_HEPATOCYTE_PROLIFERATION	13	-0.722484	-1.7767	0.00485437	0.0133173	1
GO_TRANSFORMING_GROWTH_FACTOR_BETA1_PRODUCTION	12	-0.744301	-1.7766	0.00331675	0.0133212	1
HP_CEREBRAL_CALCIFICATION	114	-0.485718	-1.77619	0	0.0133777	1
GO_INTERCELLULAR_BRIDGE	66	-0.529594	-1.77612	0	0.0133761	1
GO_POTASSIUM_CHANNEL_ACTIVITY	87	-0.502138	-1.77608	0.00132275	0.0133713	1
GO_MEMBRANE_BIOGENESIS	41	-0.570459	-1.77585	0.00142248	0.0134083	1
GO_EAR_DEVELOPMENT	177	-0.459762	-1.77579	0	0.0134035	1
GO_RESPONSE_TO_RETINOIC_ACID	90	-0.494819	-1.77579	0.00126904	0.0133901	1
GO_PHOSPHATIDYLINOSITOL_3_KINASE_SIGNALING	130	-0.478224	-1.77572	0	0.0133929	1
GO_POSITIVE_REGULATION_OF_SODIUM_ION_TRANSMEMBRANE_TRANSPORTER_ACTIVITY	15	-0.708293	-1.77564	0	0.0133903	1
GO_NEGATIVE_REGULATION_OF_VIRAL_LIFE_CYCLE	72	-0.520379	-1.7751	0	0.0134816	1
HP_DECREASED_PULMONARY_FUNCTION	16	-0.690391	-1.7749	0.0016	0.0135077	1
GO_POSITIVE_REGULATION_OF_SMOOTH_MUSCLE_CELL_MIGRATION	36	-0.578773	-1.77467	0.00146843	0.0135262	1
HP_APLASIA_HYPOPLASIA_OF_THE_ABDOMINAL_WALL_MUSCULATURE	34	-0.588623	-1.77391	0.00144509	0.0136435	1
HP_ABNORMAL_CARTILAGE_MORPHOLOGY	30	-0.601157	-1.77336	0	0.0137362	1
HP_ABNORMAL_BLEEDING	373	-0.436096	-1.77319	0	0.0137524	1
HP_ABNORMAL_SYSTEMIC_ARTERIAL_MORPHOLOGY	368	-0.439148	-1.77289	0	0.0137885	1
GO_BONE_MORPHOGENESIS	80	-0.507725	-1.77277	0	0.013795	1
GO_EMBRYONIC_CRANIAL_SKELETON_MORPHOGENESIS	43	-0.558481	-1.77191	0	0.0139444	1
GO_RESPONSE_TO_HYPEROXIA	20	-0.660769	-1.7719	0.00612557	0.0139306	1
GO_NEURON_PROJECTION_MEMBRANE	51	-0.547403	-1.77152	0.00138696	0.0139813	1
GO_VASCULAR_ENDOTHELIAL_GROWTH_FACTOR_RECEPTOR_BINDING	14	-0.710041	-1.77133	0.00497512	0.0140034	1
HP_CUTIS_MARMORATA	68	-0.51991	-1.77114	0	0.0140361	1
GO_EMBRYO_DEVELOPMENT	921	-0.419599	-1.77112	0	0.0140234	1
GO_NEGATIVE_REGULATION_OF_VIRAL_PROCESS	86	-0.499012	-1.77102	0	0.0140296	1
GO_SALIVARY_GLAND_DEVELOPMENT	33	-0.596757	-1.77092	0	0.0140359	1
GO_REGULATION_OF_PROTEIN_LOCALIZATION_TO_SYNAPSE	24	-0.648853	-1.77032	0.0015361	0.014145	1
GO_REGULATION_OF_SISTER_CHROMATID_SEGREGATION	80	-0.512414	-1.76963	0.00124069	0.0142528	1
GO_BMP_BINDING	10	-0.793931	-1.76921	0.00162866	0.0143301	1
HP_CRANIOFACIAL_HYPEROSTOSIS	28	-0.604647	-1.76864	0.00295421	0.0144239	1
GO_DEVELOPMENTAL_GROWTH_INVOLVED_IN_MORPHOGENESIS	214	-0.449206	-1.76856	0	0.0144244	1
GO_POSITIVE_REGULATION_OF_VASOCONSTRICTION	24	-0.626694	-1.7679	0.00151745	0.0145586	1
HP_ABNORMALITY_OF_THE_PULMONARY_VASCULATURE	114	-0.481548	-1.76784	0	0.0145539	1
GO_REGULATION_OF_SMOOTH_MUSCLE_CELL_DIFFERENTIATION	33	-0.596904	-1.76686	0	0.0147044	1
GO_MONOAMINE_TRANSPORT	60	-0.52134	-1.76678	0	0.0147067	1
GO_POSITIVE_REGULATION_OF_TUMOR_NECROSIS_FACTOR_BIOSYNTHETIC_PROCESS	20	-0.653899	-1.76664	0.00150376	0.0147112	1
GO_NEGATIVE_REGULATION_OF_OSSIFICATION	61	-0.527492	-1.7666	0	0.0147032	1
GO_CALCIUM_DEPENDENT_CELL_CELL_ADHESION_VIA_PLASMA_MEMBRANE_CELL_ADHESION_MOLECULES	36	-0.583493	-1.76628	0	0.0147615	1
GO_METANEPHRIC_NEPHRON_DEVELOPMENT	34	-0.589882	-1.76619	0.00420757	0.014767	1
HP_PATENT_DUCTUS_ARTERIOSUS	232	-0.447548	-1.76595	0	0.0147953	1
GO_SARCOPLASMIC_RETICULUM_MEMBRANE	33	-0.574951	-1.76504	0.00444444	0.0149404	1
HP_ABNORMAL_TRICUSPID_VALVE_MORPHOLOGY	36	-0.579012	-1.7649	0.0057554	0.014956	1
GO_POSITIVE_REGULATION_OF_CALCIUM_ION_IMPORT	14	-0.720351	-1.76484	0.00317965	0.0149561	1
GO_ANCHORED_COMPONENT_OF_MEMBRANE	121	-0.484045	-1.76479	0	0.014949	1
HP_ABNORMALITY_OF_THE_WRIST	103	-0.488884	-1.76466	0	0.0149604	1
GO_NEUREXIN_FAMILY_PROTEIN_BINDING	13	-0.724881	-1.7646	0.00483092	0.0149564	1
GO_INTRINSIC_COMPONENT_OF_PRESYNAPTIC_MEMBRANE	62	-0.52613	-1.7643	0	0.0150027	1
GO_AXON_EXTENSION	114	-0.482536	-1.76414	0.00121359	0.0150295	1
GO_RESPONSE_TO_VIRUS	286	-0.439114	-1.76289	0	0.0152423	1
GO_NEUROTRANSMITTER_RECEPTOR_COMPLEX	38	-0.573893	-1.76288	0.00440529	0.0152277	1
GO_POSITIVE_REGULATION_OF_PEPTIDE_SECRETION	176	-0.455718	-1.76281	0	0.0152316	1
HP_HERNIA	421	-0.428942	-1.76266	0	0.0152448	1
GO_REGULATION_OF_OSTEOBLAST_DIFFERENTIATION	102	-0.487974	-1.76246	0.00125945	0.0152712	1
GO_REGULATION_OF_LYMPHOCYTE_ACTIVATION	354	-0.433913	-1.76203	0	0.0153487	1
GO_REGULATION_OF_SMAD_PROTEIN_SIGNAL_TRANSDUCTION	23	-0.63556	-1.76162	0.0015083	0.0154087	1
GO_POSITIVE_REGULATION_OF_SMOOTH_MUSCLE_CELL_DIFFERENTIATION	13	-0.721202	-1.76158	0	0.0153961	1
GO_MICROFILAMENT_MOTOR_ACTIVITY	23	-0.641924	-1.76122	0.00309598	0.0154722	1
GO_PLATELET_DERIVED_GROWTH_FACTOR_RECEPTOR_BINDING	15	-0.696685	-1.7612	0.00463679	0.0154586	1
GO_NEURON_CELL_CELL_ADHESION	14	-0.709812	-1.76033	0.00162602	0.0156138	1
GO_NEGATIVE_REGULATION_OF_CELL_POPULATION_PROLIFERATION	578	-0.42217	-1.76026	0	0.0156123	1
GO_REGULATION_OF_PROTEIN_LOCALIZATION_TO_MEMBRANE	176	-0.455871	-1.7595	0	0.0157357	1
GO_NEURON_SPINE	160	-0.464664	-1.75948	0.00118483	0.0157239	1
GO_REGULATION_OF_NMDA_RECEPTOR_ACTIVITY	29	-0.590081	-1.75946	0	0.0157141	1
GO_REGULATION_OF_CELLULAR_COMPONENT_SIZE	345	-0.427823	-1.75912	0	0.0157601	1
GO_CELLULAR_SODIUM_ION_HOMEOSTASIS	15	-0.716837	-1.75894	0.00334448	0.0157776	1
GO_AEROBIC_ELECTRON_TRANSPORT_CHAIN	20	-0.662225	-1.75813	0.0031348	0.0159204	1
GO_INORGANIC_ION_TRANSMEMBRANE_TRANSPORT	693	-0.420874	-1.75793	0	0.0159388	1
GO_SYNAPTIC_SIGNALING	585	-0.423657	-1.75748	0	0.0159985	1
HP_ABNORMALITY_OF_IMMUNE_SERUM_PROTEIN_PHYSIOLOGY	13	-0.729329	-1.75738	0.00481541	0.0160036	1
GO_TROPHOBLAST_CELL_MIGRATION	12	-0.742071	-1.75707	0.00478469	0.016057	1
GO_ESTABLISHMENT_OR_MAINTENANCE_OF_CELL_POLARITY	204	-0.448655	-1.757	0	0.016051	1
GO_POSITIVE_REGULATION_OF_PATHWAY_RESTRICTED_SMAD_PROTEIN_PHOSPHORYLATION	39	-0.575626	-1.75696	0	0.016037	1
GO_REGULATION_OF_CELL_DIVISION	147	-0.462754	-1.7569	0.00119904	0.0160331	1
GO_NEGATIVE_REGULATION_OF_POTASSIUM_ION_TRANSPORT	28	-0.615629	-1.75652	0.00451807	0.0161064	1
GO_SKELETAL_SYSTEM_MORPHOGENESIS	189	-0.452002	-1.75639	0	0.0161144	1
GO_REGULATION_OF_LONG_TERM_NEURONAL_SYNAPTIC_PLASTICITY	23	-0.629886	-1.75618	0.00449775	0.0161465	1
HP_CELLULITIS	31	-0.579943	-1.75548	0.00291545	0.0162606	1
GO_NEGATIVE_REGULATION_OF_AXONOGENESIS	62	-0.520627	-1.75543	0.00267023	0.0162525	1
GO_CHROMOSOME_LOCALIZATION	75	-0.508873	-1.75465	0.00127877	0.0164041	1
GO_NEGATIVE_REGULATION_OF_CANONICAL_WNT_SIGNALING_PATHWAY	167	-0.45915	-1.75458	0	0.0163989	1
GO_NEGATIVE_REGULATION_OF_EPITHELIAL_CELL_DIFFERENTIATION	37	-0.576392	-1.7545	0.00143062	0.0164165	1
GO_REGULATION_OF_CARDIAC_MUSCLE_CONTRACTION_BY_CALCIUM_ION_SIGNALING	24	-0.630663	-1.75448	0.00153139	0.0164063	1
GO_STEM_CELL_DIFFERENTIATION	230	-0.445081	-1.75444	0	0.0164001	1
GO_POSITIVE_REGULATION_OF_CHONDROCYTE_DIFFERENTIATION	20	-0.660668	-1.75433	0.00619195	0.0164157	1
HP_PLATYSPONDYLY	99	-0.480112	-1.75422	0.00123762	0.0164214	1
GO_PHOSPHATIDYLSERINE_METABOLIC_PROCESS	25	-0.62468	-1.75362	0.0015015	0.0165104	1
GO_OXIDATIVE_PHOSPHORYLATION	139	-0.46758	-1.75336	0	0.0165517	1
GO_GROWTH	858	-0.415054	-1.75334	0	0.0165433	1
GO_CENTRAL_NERVOUS_SYSTEM_DEVELOPMENT	847	-0.41499	-1.75308	0	0.0165894	1
GO_SYNAPTIC_TRANSMISSION_GABAERGIC	37	-0.582498	-1.75294	0.00421941	0.0166018	1
GO_POSITIVE_REGULATION_OF_CYTOSKELETON_ORGANIZATION	211	-0.452613	-1.75287	0	0.0165964	1
GO_MYOSIN_HEAVY_CHAIN_BINDING	10	-0.783026	-1.75279	0.00325733	0.0165979	1
GO_REGULATION_OF_NEURON_DIFFERENTIATION	587	-0.418706	-1.75277	0	0.0165896	1
GO_REGULATION_OF_CELL_ACTIVATION	457	-0.42557	-1.75272	0	0.0165832	1
GO_SULFURIC_ESTER_HYDROLASE_ACTIVITY	15	-0.697611	-1.75271	0.00653595	0.0165729	1
GO_RESPIRATORY_SYSTEM_DEVELOPMENT	179	-0.455226	-1.75214	0	0.0166816	1
GO_MITOTIC_NUCLEAR_ENVELOPE_DISASSEMBLY	12	-0.712631	-1.7519	0.0130933	0.0167282	1
GO_MACROPHAGE_ACTIVATION	74	-0.511039	-1.75162	0	0.016763	1
GO_ZYMOGEN_ACTIVATION	46	-0.5492	-1.75143	0	0.0167918	1
GO_POSITIVE_REGULATION_OF_SUBSTRATE_ADHESION_DEPENDENT_CELL_SPREADING	34	-0.585645	-1.75126	0	0.0168157	1
HP_URINARY_RETENTION	14	-0.708236	-1.74995	0.00813008	0.0170421	1
GO_POSITIVE_REGULATION_OF_COLLAGEN_METABOLIC_PROCESS	24	-0.623697	-1.74965	0.00624025	0.0170939	1
GO_VESICLE_LUMEN	276	-0.439664	-1.74964	0	0.0170784	1
HP_GENU_VALGUM	107	-0.479092	-1.74945	0	0.0171087	1
GO_REGULATION_OF_T_CELL_CYTOKINE_PRODUCTION	26	-0.610646	-1.74938	0.0048	0.017103	1
GO_MESENCHYMAL_CELL_PROLIFERATION	39	-0.563449	-1.74926	0	0.0171118	1
GO_POSITIVE_REGULATION_OF_LEUKOCYTE_CELL_CELL_ADHESION	190	-0.449747	-1.74908	0	0.0171255	1
HP_PREMATURE_LOSS_OF_TEETH	38	-0.561469	-1.74903	0	0.0171236	1
GO_REGULATION_OF_POTASSIUM_ION_TRANSMEMBRANE_TRANSPORTER_ACTIVITY	49	-0.540247	-1.74848	0.00268456	0.017216	1
GO_ACTION_POTENTIAL	121	-0.473923	-1.74744	0	0.0174131	1
HP_ACUTE_KIDNEY_INJURY	24	-0.620521	-1.74741	0.0046729	0.0174051	1
GO_RESPONSE_TO_INTERFERON_BETA	24	-0.620161	-1.74696	0.00146628	0.0174863	1
GO_SARCOPLASMIC_RETICULUM_CALCIUM_ION_TRANSPORT	31	-0.589821	-1.74622	0.0117647	0.0176506	1
GO_NEGATIVE_REGULATION_OF_MACROPHAGE_ACTIVATION	12	-0.735002	-1.74566	0.00696864	0.0177684	1
GO_SCAVENGER_RECEPTOR_ACTIVITY	37	-0.572358	-1.74525	0.00145138	0.0178422	1
HP_ABNORMALITY_OF_CIRCULATING_ENZYME_LEVEL	247	-0.440422	-1.74494	0	0.0179062	1
HP_MYOFIBRILLAR_MYOPATHY	10	-0.774504	-1.74481	0.005	0.0179191	1
GO_CAVEOLA	75	-0.506992	-1.74451	0.00133333	0.0179695	1
HP_HYPERKERATOSIS	206	-0.445081	-1.74371	0	0.0181382	1
HP_PROGRESSIVE_HEARING_IMPAIRMENT	41	-0.560606	-1.74326	0.00282885	0.0182364	1
GO_RECEPTOR_SIGNALING_PATHWAY_VIA_STAT	116	-0.469126	-1.74325	0	0.018221	1
HP_RENAL_DUPLICATION	23	-0.629265	-1.74303	0.00787402	0.0182556	1
GO_EMBRYONIC_MORPHOGENESIS	502	-0.422295	-1.74284	0	0.0182903	1
GO_CELL_PART_MORPHOGENESIS	620	-0.41838	-1.74276	0	0.0182913	1
HP_MYOCLONIC_SPASMS	19	-0.645758	-1.7427	0.00311526	0.0182893	1
GO_POSITIVE_REGULATION_OF_TRANSPORT	799	-0.413914	-1.74235	0	0.0183362	1
GO_NEGATIVE_REGULATION_OF_HEMOPOIESIS	115	-0.479673	-1.74216	0	0.0183734	1
HP_HYPERTROPHIC_CARDIOMYOPATHY	240	-0.437189	-1.74159	0	0.0184916	1
GO_NEGATIVE_REGULATION_OF_VASCULAR_ASSOCIATED_SMOOTH_MUSCLE_CELL_PROLIFERATION	17	-0.692656	-1.74112	0.00933126	0.0185869	1
GO_REGULATION_OF_CARDIAC_MUSCLE_CONTRACTION_BY_REGULATION_OF_THE_RELEASE_OF_SEQUESTERED_CALCIUM_ION	20	-0.639196	-1.74084	0.00480769	0.0186172	1
GO_HETEROPHILIC_CELL_CELL_ADHESION_VIA_PLASMA_MEMBRANE_CELL_ADHESION_MOLECULES	33	-0.577177	-1.74072	0.00296296	0.0186236	1
GO_HEPARAN_SULFATE_PROTEOGLYCAN_BIOSYNTHETIC_PROCESS	22	-0.636206	-1.74063	0	0.0186252	1
GO_POSITIVE_REGULATION_OF_CARTILAGE_DEVELOPMENT	30	-0.599391	-1.74039	0.0104322	0.018662	1
HP_CENTRALLY_NUCLEATED_SKELETAL_MUSCLE_FIBERS	25	-0.604549	-1.7403	0.00900901	0.0186673	1
HP_EXCESSIVE_WRINKLED_SKIN	30	-0.591623	-1.74	0.00154321	0.0187173	1
GO_GROWTH_FACTOR_ACTIVITY	121	-0.470058	-1.73984	0	0.0187359	1
HP_ECTOPIA_LENTIS	36	-0.580067	-1.73973	0.0028169	0.0187421	1
GO_POSITIVE_REGULATION_OF_EXCITATORY_POSTSYNAPTIC_POTENTIAL	24	-0.629709	-1.73942	0.00442478	0.0188118	1
GO_DEFENSE_RESPONSE_TO_VIRUS	210	-0.445656	-1.73929	0	0.0188227	1
GO_POSITIVE_REGULATION_OF_RENAL_SODIUM_EXCRETION	12	-0.728534	-1.73919	0.00645161	0.0188363	1
GO_NEGATIVE_REGULATION_OF_CELL_GROWTH	174	-0.449667	-1.73914	0	0.0188358	1
HP_ABNORMAL_CRY	42	-0.552099	-1.73883	0.00289436	0.0188816	1
GO_CGMP_METABOLIC_PROCESS	15	-0.700545	-1.73856	0.00314465	0.0189206	1
GO_REGULATION_OF_RECEPTOR_LOCALIZATION_TO_SYNAPSE	16	-0.667757	-1.73825	0.00818331	0.0189812	1
GO_REGULATION_OF_NUCLEAR_DIVISION	168	-0.448166	-1.73811	0	0.0190023	1
GO_SYMPATHETIC_NERVOUS_SYSTEM_DEVELOPMENT	14	-0.698567	-1.73754	0.0015748	0.0191247	1
HP_SPONDYLOLISTHESIS	16	-0.683115	-1.73752	0.00311042	0.0191174	1
GO_PROTEIN_DEPOLYMERIZATION	104	-0.475692	-1.73671	0	0.0192894	1
GO_POSITIVE_REGULATION_OF_IMMUNE_SYSTEM_PROCESS	795	-0.412629	-1.73617	0	0.0194067	1
HP_HYPOPARATHYROIDISM	40	-0.561782	-1.73592	0.00277008	0.0194592	1
GO_REGULATION_OF_EMBRYONIC_DEVELOPMENT	112	-0.472612	-1.73573	0	0.0194871	1
GO_RELEASE_OF_SEQUESTERED_CALCIUM_ION_INTO_CYTOSOL_BY_ENDOPLASMIC_RETICULUM	27	-0.595845	-1.73549	0.00742942	0.0195225	1
HP_FIRST_DEGREE_ATRIOVENTRICULAR_BLOCK	24	-0.614807	-1.7352	0.0046225	0.0195859	1
GO_SLEEP	23	-0.632951	-1.73507	0.00445104	0.019597	1
GO_INSULIN_LIKE_GROWTH_FACTOR_BINDING	21	-0.62631	-1.73468	0.00451128	0.0196761	1
GO_NEGATIVE_REGULATION_OF_VOLTAGE_GATED_CALCIUM_CHANNEL_ACTIVITY	11	-0.733169	-1.73459	0.00330033	0.0196879	1
GO_REGULATION_OF_GLOMERULUS_DEVELOPMENT	11	-0.747664	-1.73454	0.00160772	0.0196801	1
HP_NOCTURNAL_HYPOVENTILATION	14	-0.693956	-1.73401	0.00493421	0.0197849	1
HP_RIDGED_NAIL	20	-0.646345	-1.73364	0.00625	0.0198607	1
GO_G_PROTEIN_COUPLED_RECEPTOR_SIGNALING_PATHWAY	722	-0.41317	-1.7327	0	0.0200879	1
GO_MUSCLE_ORGAN_MORPHOGENESIS	67	-0.511844	-1.73255	0	0.0200928	1
HP_TRICUSPID_VALVE_PROLAPSE	12	-0.717429	-1.73212	0.00327332	0.020182	1
GO_POSITIVE_REGULATION_OF_PHOSPHORUS_METABOLIC_PROCESS	962	-0.409546	-1.73178	0	0.0202424	1
GO_REGULATION_OF_TYPE_2_IMMUNE_RESPONSE	23	-0.622903	-1.7316	0.00447761	0.0202675	1
GO_NEGATIVE_REGULATION_OF_GLIOGENESIS	32	-0.568774	-1.73145	0.00291121	0.0202853	1
GO_LYMPHOCYTE_MIGRATION	78	-0.493559	-1.73122	0.00127065	0.0203196	1
HP_AMYLOIDOSIS	22	-0.62468	-1.73109	0.00454545	0.0203307	1
GO_POSITIVE_REGULATION_OF_HEART_RATE	20	-0.65541	-1.73079	0.003125	0.0203825	1
GO_REGULATION_OF_RECEPTOR_BINDING	24	-0.620622	-1.73077	0.00149477	0.0203714	1
GO_NEGATIVE_REGULATION_OF_MULTI_ORGANISM_PROCESS	17	-0.671965	-1.73042	0.0032	0.0204405	1
GO_POSITIVE_REGULATION_OF_RHO_PROTEIN_SIGNAL_TRANSDUCTION	28	-0.593487	-1.72989	0.00900901	0.0205555	1
GO_BUNDLE_OF_HIS_CELL_TO_PURKINJE_MYOCYTE_COMMUNICATION	12	-0.706172	-1.72984	0.00652529	0.0205489	1
GO_REGULATION_OF_ODONTOGENESIS	20	-0.644122	-1.72977	0.003125	0.0205506	1
GO_KIDNEY_MESENCHYME_DEVELOPMENT	17	-0.671721	-1.72949	0.0015748	0.0206147	1
GO_NEGATIVE_REGULATION_OF_LIPASE_ACTIVITY	15	-0.679562	-1.72908	0.00783699	0.0207026	1
GO_REGULATION_OF_ANION_TRANSPORT	86	-0.491311	-1.7282	0	0.0208956	1
GO_EOSINOPHIL_MIGRATION	15	-0.685977	-1.72811	0.00642055	0.020897	1
GO_DYNACTIN_COMPLEX	13	-0.717436	-1.72794	0.00811688	0.0209369	1
HP_SYNOSTOSIS_INVOLVING_BONES_OF_THE_UPPER_LIMBS	91	-0.482197	-1.72758	0.00127065	0.0209994	1
GO_REGULATION_OF_PROTEIN_LOCALIZATION_TO_ENDOSOME	13	-0.706275	-1.72757	0.0114193	0.0209825	1
GO_ORGAN_GROWTH	157	-0.453431	-1.72737	0	0.0210148	1
GO_NEURON_PROJECTION_EXTENSION	156	-0.457915	-1.72718	0	0.0210371	1
GO_REGULATION_OF_PHAGOCYTOSIS	75	-0.496833	-1.72716	0.00127551	0.0210238	1
GO_POSITIVE_REGULATION_OF_INTRACELLULAR_SIGNAL_TRANSDUCTION	892	-0.409603	-1.72688	0	0.0210914	1
GO_EMBRYONIC_CAMERA_TYPE_EYE_FORMATION	10	-0.749713	-1.72598	0.00933126	0.0212636	1
GO_MONOVALENT_INORGANIC_CATION_TRANSPORT	435	-0.420551	-1.72587	0	0.021281	1
GO_POSITIVE_REGULATION_OF_HEMOPOIESIS	179	-0.447319	-1.72532	0	0.0214156	1
GO_CELL_CELL_JUNCTION_ORGANIZATION	179	-0.447622	-1.72512	0	0.0214438	1
GO_INTRINSIC_COMPONENT_OF_POSTSYNAPTIC_SPECIALIZATION_MEMBRANE	53	-0.531683	-1.72506	0.00132275	0.0214393	1
GO_CELL_JUNCTION_DISASSEMBLY	16	-0.664856	-1.72468	0.00326797	0.0215109	1
GO_ANATOMICAL_STRUCTURE_ARRANGEMENT	14	-0.716014	-1.72458	0.00160772	0.0215145	1
HP_SPRENGEL_ANOMALY	24	-0.61812	-1.72439	0.00312012	0.0215542	1
GO_NEGATIVE_REGULATION_OF_SMALL_GTPASE_MEDIATED_SIGNAL_TRANSDUCTION	55	-0.521776	-1.72389	0.0013624	0.0216597	1
HP_PAROXYSMAL_ATRIAL_FIBRILLATION	10	-0.754328	-1.72357	0.00493421	0.0217182	1
GO_DIVALENT_INORGANIC_CATION_TRANSPORT	386	-0.423293	-1.72354	0	0.0217054	1
GO_DETECTION_OF_STIMULUS_INVOLVED_IN_SENSORY_PERCEPTION_OF_PAIN	24	-0.607738	-1.72343	0.0133531	0.0217142	1
GO_NEGATIVE_REGULATION_OF_EPITHELIAL_CELL_MIGRATION	68	-0.503937	-1.72343	0.00133333	0.021696	1
GO_MYELOID_LEUKOCYTE_CYTOKINE_PRODUCTION	28	-0.596223	-1.72341	0	0.0216823	1
HP_STENOSIS_OF_THE_EXTERNAL_AUDITORY_CANAL	21	-0.626538	-1.72335	0.00470958	0.0216767	1
GO_POSITIVE_REGULATION_OF_STEROID_BIOSYNTHETIC_PROCESS	13	-0.714445	-1.72247	0.00977199	0.0218697	1
GO_TUMOR_NECROSIS_FACTOR_BIOSYNTHETIC_PROCESS	27	-0.597519	-1.72233	0.00447761	0.0218954	1
GO_CARDIAC_MUSCLE_CELL_ACTION_POTENTIAL	65	-0.504273	-1.72231	0.00274348	0.0218807	1
HP_ABNORMAL_NEURAL_TUBE_MORPHOLOGY	153	-0.452797	-1.7222	0	0.0218947	1
HP_SMALL_BASAL_GANGLIA	11	-0.724367	-1.7221	0.00648298	0.0219042	1
GO_PROTEIN_KINASE_ACTIVITY	525	-0.413526	-1.72194	0	0.0219297	1
GO_POSITIVE_REGULATION_OF_PROTEIN_MATURATION	23	-0.615821	-1.72194	0.00620155	0.0219124	1
GO_VENTRICULAR_CARDIAC_MUSCLE_TISSUE_DEVELOPMENT	45	-0.534732	-1.7216	0	0.0219914	1
GO_REGULATION_OF_PROTEIN_TYROSINE_KINASE_ACTIVITY	86	-0.484719	-1.72151	0.00131752	0.0220017	1
GO_PEPTIDE_SECRETION	436	-0.41991	-1.72122	0	0.0220414	1
HP_CONTRACTURES_OF_THE_JOINTS_OF_THE_LOWER_LIMBS	135	-0.453296	-1.7212	0	0.0220258	1
GO_REGULATION_OF_SODIUM_ION_TRANSMEMBRANE_TRANSPORT	56	-0.518127	-1.72118	0.0055325	0.0220129	1
GO_EMBRYO_DEVELOPMENT_ENDING_IN_BIRTH_OR_EGG_HATCHING	589	-0.41262	-1.72115	0	0.0220035	1
GO_VENTRICULAR_SEPTUM_MORPHOGENESIS	40	-0.558617	-1.7211	0.0013587	0.0220031	1
GO_REGULATION_OF_SODIUM_ION_TRANSPORT	75	-0.490716	-1.72087	0.001287	0.0220585	1
GO_REGULATION_OF_MACROPHAGE_ACTIVATION	42	-0.5495	-1.72034	0	0.0221999	1
GO_MONOSACCHARIDE_BINDING	61	-0.507421	-1.72027	0.00133333	0.0221975	1
HP_TENTED_UPPER_LIP_VERMILION	72	-0.506102	-1.72019	0.00134771	0.0222058	1
GO_T_CELL_ACTIVATION	380	-0.42402	-1.71988	0	0.0222679	1
HP_ABNORMALITY_OF_UPPER_LIMB_JOINT	389	-0.422315	-1.71986	0	0.0222557	1
GO_MUSCLE_ADAPTATION	96	-0.476109	-1.7198	0	0.0222568	1
GO_RESPONSE_TO_PROSTAGLANDIN	28	-0.594462	-1.71969	0.00311042	0.0222668	1
GO_GLAND_DEVELOPMENT	374	-0.422756	-1.71953	0	0.0223111	1
GO_MACROPHAGE_PROLIFERATION	10	-0.75204	-1.71933	0.00505902	0.0223554	1
HP_ABNORMAL_T_WAVE	23	-0.618972	-1.71928	0.00764526	0.0223502	1
GO_NEGATIVE_REGULATION_OF_AMINO_ACID_TRANSPORT	12	-0.711736	-1.71914	0.00315457	0.0223742	1
GO_RHYTHMIC_PROCESS	260	-0.430442	-1.71906	0	0.0223734	1
GO_ENERGY_RESERVE_METABOLIC_PROCESS	76	-0.494095	-1.71871	0.001321	0.0224509	1
HP_BILATERAL_SENSORINEURAL_HEARING_IMPAIRMENT	61	-0.517903	-1.71813	0	0.0225897	1
GO_NEGATIVE_REGULATION_OF_PROTEIN_IMPORT	13	-0.696097	-1.71741	0.00490998	0.0227623	1
GO_CENTRAL_NERVOUS_SYSTEM_PROJECTION_NEURON_AXONOGENESIS	25	-0.610636	-1.71713	0.00459418	0.0228235	1
HP_BUNDLE_BRANCH_BLOCK	46	-0.527353	-1.71705	0	0.0228259	1
GO_UDP_GLYCOSYLTRANSFERASE_ACTIVITY	115	-0.465674	-1.71643	0.00257069	0.0229438	1
GO_REGULATION_OF_ORGANIC_ACID_TRANSPORT	52	-0.525047	-1.71638	0	0.0229356	1
HP_NEOPLASM_BY_HISTOLOGY	266	-0.433303	-1.71632	0	0.0229283	1
GO_REGULATION_OF_LIPID_KINASE_ACTIVITY	54	-0.516443	-1.71621	0.00140449	0.0229367	1
GO_CELL_CELL_SIGNALING_BY_WNT	471	-0.414008	-1.71577	0	0.0230348	1
GO_POSITIVE_REGULATION_OF_NEURON_DIFFERENTIATION	327	-0.422731	-1.71577	0	0.0230161	1
GO_NOTCH_SIGNALING_PATHWAY	169	-0.448173	-1.7157	0	0.0230079	1
GO_CELLULAR_RESPONSE_TO_ALCOHOL	82	-0.484052	-1.71557	0.00256739	0.023031	1
GO_REGULATION_OF_FIBROBLAST_GROWTH_FACTOR_RECEPTOR_SIGNALING_PATHWAY	29	-0.58567	-1.71544	0.00755287	0.023054	1
GO_PROTEIN_POLYMERIZATION	274	-0.430063	-1.71527	0	0.023077	1
HP_AGENESIS_OF_INCISOR	18	-0.645838	-1.71505	0.00152672	0.0231156	1
GO_REGULATION_OF_PROTEIN_LOCALIZATION_TO_PLASMA_MEMBRANE	91	-0.482341	-1.71504	0.0012837	0.0231004	1
GO_POSITIVE_REGULATION_OF_LIPID_KINASE_ACTIVITY	29	-0.589755	-1.71501	0.002886	0.0230905	1
HP_JOINT_CONTRACTURES_INVOLVING_THE_JOINTS_OF_THE_FEET	20	-0.646482	-1.71456	0.00153846	0.0232181	1
HP_WIDE_ANTERIOR_FONTANEL	67	-0.496876	-1.71436	0.00134589	0.0232574	1
GO_POTASSIUM_ION_IMPORT_ACROSS_PLASMA_MEMBRANE	37	-0.554369	-1.71411	0.00281294	0.0233017	1
GO_PROTEIN_KINASE_B_SIGNALING	216	-0.436677	-1.71364	0	0.0234073	1
GO_CELLULAR_RESPONSE_TO_VITAMIN	28	-0.594384	-1.71359	0.00874636	0.023404	1
HP_ABNORMAL_ENDOCARDIUM_MORPHOLOGY	49	-0.532904	-1.71349	0.00542005	0.0234103	1
GO_HYALURONAN_BIOSYNTHETIC_PROCESS	13	-0.70256	-1.71347	0.0127592	0.0233966	1
GO_CELLULAR_GLUCAN_METABOLIC_PROCESS	68	-0.505631	-1.71342	0	0.0233899	1
HP_MYOTONIA	25	-0.607534	-1.71326	0.00295421	0.0234159	1
GO_VACUOLAR_LUMEN	145	-0.454317	-1.71304	0	0.0234444	1
GO_GLUTATHIONE_TRANSFERASE_ACTIVITY	19	-0.639381	-1.7125	0.00469484	0.0235803	1
HP_HODGKIN_LYMPHOMA	12	-0.721849	-1.7125	0.00990099	0.023564	1
HP_ABNORMAL_MORPHOLOGY_OF_THE_GREAT_VESSELS	433	-0.414684	-1.71221	0	0.0236137	1
GO_REGULATION_OF_VASCULAR_ASSOCIATED_SMOOTH_MUSCLE_CELL_DIFFERENTIATION	18	-0.651043	-1.71208	0.00496689	0.0236283	1
GO_REGULATION_OF_PROTEIN_POLYMERIZATION	209	-0.438281	-1.71203	0	0.023624	1
HP_MOOD_CHANGES	14	-0.70049	-1.7111	0.00782473	0.0238257	1
GO_COCHLEA_DEVELOPMENT	36	-0.557998	-1.71107	0.00437956	0.0238136	1
GO_PLATELET_DENSE_GRANULE_LUMEN	12	-0.723995	-1.71079	0.0134003	0.0238723	1
HP_LIMB_JOINT_CONTRACTURE	305	-0.425703	-1.71076	0	0.023861	1
GO_CELL_CORTEX	262	-0.427296	-1.71062	0	0.023889	1
GO_REGULATION_OF_SMALL_GTPASE_MEDIATED_SIGNAL_TRANSDUCTION	300	-0.423072	-1.71	0	0.024037	1
GO_RESPONSE_TO_TUMOR_NECROSIS_FACTOR	262	-0.423449	-1.70985	0	0.0240749	1
GO_GLYCOPROTEIN_COMPLEX	16	-0.674836	-1.70968	0.00780031	0.0241128	1
HP_ANOMALOUS_PULMONARY_VENOUS_RETURN	17	-0.662114	-1.70935	0.0204403	0.0242	1
GO_ENDOCARDIAL_CUSHION_DEVELOPMENT	42	-0.539955	-1.70928	0.00289855	0.0241996	1
HP_RESTRICTIVE_CARDIOMYOPATHY	12	-0.723593	-1.70921	0.0031746	0.0241991	1
HP_TACHYCARDIA	92	-0.475278	-1.70855	0.00251889	0.0243674	1
GO_CALCIUM_ION_TRANSMEMBRANE_TRANSPORTER_ACTIVITY	111	-0.466474	-1.70846	0.00125471	0.0243667	1
GO_FACE_DEVELOPMENT	45	-0.534774	-1.70823	0.00276243	0.0244186	1
GO_NEGATIVE_REGULATION_OF_CELL_PROJECTION_ORGANIZATION	165	-0.44982	-1.70813	0	0.0244298	1
HP_TELANGIECTASIA	126	-0.456148	-1.70772	0	0.0245128	1
HP_CACHEXIA	55	-0.520414	-1.70767	0.00134048	0.0245036	1
HP_PROTRUDING_EAR	137	-0.457521	-1.70746	0	0.024551	1
GO_POSITIVE_REGULATION_OF_HEART_GROWTH	37	-0.555172	-1.70707	0	0.0246531	1
GO_REGULATION_OF_CARDIAC_MUSCLE_CELL_DIFFERENTIATION	37	-0.550542	-1.70669	0.00291545	0.0247399	1
GO_SECRETION_BY_TISSUE	25	-0.603304	-1.70656	0.010479	0.0247524	1
GO_ODONTOGENESIS_OF_DENTIN_CONTAINING_TOOTH	70	-0.501908	-1.70651	0	0.024749	1
GO_POSTSYNAPTIC_SPECIALIZATION_ASSEMBLY	17	-0.653738	-1.70646	0.0063593	0.0247398	1
GO_POSITIVE_REGULATION_OF_TYPE_2_IMMUNE_RESPONSE	13	-0.705557	-1.70643	0.0051458	0.0247255	1
GO_CELLULAR_RESPONSE_TO_PROSTAGLANDIN_STIMULUS	20	-0.631345	-1.70643	0.0066778	0.0247062	1
GO_SIGNAL_TRANSDUCTION_BY_PROTEIN_PHOSPHORYLATION	791	-0.406118	-1.70624	0	0.0247313	1
GO_HIGH_VOLTAGE_GATED_CALCIUM_CHANNEL_ACTIVITY	10	-0.766657	-1.70604	0.00166389	0.0247682	1
GO_CELL_SURFACE_RECEPTOR_SIGNALING_PATHWAY_INVOLVED_IN_CELL_CELL_SIGNALING	554	-0.410666	-1.70594	0	0.0247748	1
GO_POSITIVE_REGULATION_OF_SYNAPTIC_TRANSMISSION_GABAERGIC	11	-0.722739	-1.7059	0.00837521	0.0247672	1
GO_REGULATION_OF_CALCIUM_ION_TRANSPORT_INTO_CYTOSOL	75	-0.494269	-1.70585	0	0.0247646	1
GO_RENAL_ABSORPTION	16	-0.678921	-1.70583	0.00622084	0.0247512	1
GO_REGULATION_OF_SYNAPTIC_TRANSMISSION_GLUTAMATERGIC	57	-0.518701	-1.70574	0.00135318	0.0247603	1
HP_ACQUIRED_ABNORMAL_HAIR_PATTERN	18	-0.643549	-1.70546	0.0114943	0.0248235	1
GO_CELL_PROLIFERATION_INVOLVED_IN_KIDNEY_DEVELOPMENT	19	-0.633817	-1.70538	0.0048	0.024831	1
GO_ADENYLATE_CYCLASE_BINDING	12	-0.71308	-1.70523	0.00694444	0.0248558	1
GO_NEGATIVE_REGULATION_OF_ALPHA_BETA_T_CELL_DIFFERENTIATION	21	-0.630205	-1.70516	0.00458716	0.0248607	1
GO_NEUROPEPTIDE_RECEPTOR_BINDING	13	-0.699721	-1.70516	0.00620155	0.0248431	1
GO_METAL_ION_HOMEOSTASIS	522	-0.410177	-1.70474	0	0.0249542	1
HP_ABNORMAL_VASCULAR_MORPHOLOGY	649	-0.405168	-1.70464	0	0.0249673	1
HP_JUVENILE_ASEPTIC_NECROSIS	27	-0.592813	-1.70458	0.00904977	0.0249678	1
GO_REGULATION_OF_ACTOMYOSIN_STRUCTURE_ORGANIZATION	90	-0.47531	-1.70386	0.00129366	0.0251533	1
GO_ACTIVIN_RECEPTOR_SIGNALING_PATHWAY	35	-0.56044	-1.70383	0.00722543	0.0251438	1
HP_RECURRENT_LOWER_RESPIRATORY_TRACT_INFECTIONS	76	-0.49039	-1.70358	0	0.0251922	1
HP_SUPERNUMERARY_NIPPLE	36	-0.548031	-1.7035	0.00737463	0.0251943	1
GO_REGULATION_OF_MEMBRANE_PROTEIN_ECTODOMAIN_PROTEOLYSIS	21	-0.619915	-1.70332	0.00616333	0.0252352	1
GO_REGULATION_OF_ENDOTHELIAL_CELL_CHEMOTAXIS	18	-0.641423	-1.70308	0.0177515	0.0252842	1
HP_SOFT_TISSUE_SARCOMA	105	-0.472928	-1.70299	0.00241546	0.0252888	1
GO_SPINDLE	344	-0.42055	-1.70284	0	0.0253081	1
GO_OLIGOSACCHARIDE_BIOSYNTHETIC_PROCESS	14	-0.683257	-1.70281	0.00343053	0.0252978	1
GO_CELLULAR_RESPONSE_TO_RETINOIC_ACID	55	-0.522202	-1.70281	0.00405954	0.0252792	1
GO_ESTABLISHMENT_OF_CELL_POLARITY	130	-0.453201	-1.70247	0.00121065	0.0253454	1
GO_PHARYNGEAL_SYSTEM_DEVELOPMENT	22	-0.622551	-1.70187	0.00308166	0.0254871	1
GO_REGULATION_OF_FIBRINOLYSIS	11	-0.721015	-1.7016	0.00990099	0.0255342	1
GO_POSITIVE_REGULATION_OF_BLOOD_VESSEL_ENDOTHELIAL_CELL_MIGRATION	56	-0.51897	-1.70138	0.00133869	0.0255836	1
GO_NEGATIVE_REGULATION_OF_NUCLEOCYTOPLASMIC_TRANSPORT	21	-0.61817	-1.70137	0.0122888	0.0255682	1
GO_SKELETAL_MUSCLE_ORGAN_DEVELOPMENT	139	-0.449557	-1.70109	0	0.0256355	1
GO_REGULATION_OF_EXTRACELLULAR_MATRIX_ORGANIZATION	37	-0.55259	-1.701	0.00283688	0.0256438	1
GO_CRANIAL_SKELETAL_SYSTEM_DEVELOPMENT	59	-0.506775	-1.70085	0.00417246	0.0256726	1
GO_METANEPHRIC_MESENCHYME_DEVELOPMENT	13	-0.69773	-1.70081	0.0113636	0.0256629	1
GO_SCAFFOLD_PROTEIN_BINDING	56	-0.512741	-1.7008	0	0.0256466	1
GO_REGULATION_OF_NATURAL_KILLER_CELL_MEDIATED_IMMUNITY	31	-0.585089	-1.70062	0.00597907	0.0256809	1
GO_RUFFLE	169	-0.435681	-1.70056	0	0.025672	1
GO_REPLACEMENT_OSSIFICATION	26	-0.601428	-1.70051	0.00306279	0.0256664	1
GO_NEGATIVE_REGULATION_OF_GROWTH	230	-0.42971	-1.70049	0	0.0256518	1
GO_CORTICAL_CYTOSKELETON_ORGANIZATION	58	-0.50496	-1.70042	0.0013369	0.0256543	1
HP_OPEN_BITE	40	-0.54425	-1.70015	0.00141044	0.025704	1
GO_NEGATIVE_REGULATION_OF_NUCLEAR_DIVISION	54	-0.518731	-1.69995	0.00408163	0.0257333	1
GO_NEGATIVE_REGULATION_OF_EPIDERMIS_DEVELOPMENT	14	-0.679961	-1.69989	0.00482315	0.0257325	1
GO_ENDOCARDIAL_CUSHION_FORMATION	22	-0.616053	-1.69984	0.00923077	0.0257309	1
GO_MEMBRANE_REGION	302	-0.420299	-1.6998	0	0.0257204	1
HP_ERYTHEMA	97	-0.474847	-1.69978	0.00125156	0.0257108	1
GO_NEGATIVE_REGULATION_OF_CELL_SUBSTRATE_JUNCTION_ORGANIZATION	18	-0.64978	-1.69977	0.0108865	0.0256938	1
GO_CELLULAR_RESPONSE_TO_SALT_STRESS	12	-0.71334	-1.6996	0.00833333	0.0257181	1
GO_REGULATION_OF_HORMONE_SECRETION	203	-0.431529	-1.69936	0	0.0257844	1
GO_REGULATION_OF_PROTEIN_SERINE_THREONINE_KINASE_ACTIVITY	468	-0.411746	-1.69902	0	0.0258644	1
GO_NEURON_DEVELOPMENT	989	-0.402314	-1.69878	0	0.0259143	1
GO_REGULATION_OF_STEM_CELL_PROLIFERATION	56	-0.519088	-1.69849	0	0.0259996	1
GO_POSTSYNAPTIC_MEMBRANE_ASSEMBLY	11	-0.730527	-1.69825	0.0192616	0.0260542	1
GO_REGULATION_OF_RESPONSE_TO_EXTERNAL_STIMULUS	832	-0.402249	-1.69796	0	0.0261128	1
GO_REGULATION_OF_PEPTIDE_SECRETION	336	-0.418276	-1.69788	0	0.0261142	1
HP_PRENATAL_MATERNAL_ABNORMALITY	106	-0.464931	-1.69742	0	0.0262337	1
GO_REGULATION_OF_INTEGRIN_MEDIATED_SIGNALING_PATHWAY	15	-0.670433	-1.69737	0.00966184	0.0262253	1
GO_REGULATION_OF_MESENCHYMAL_CELL_PROLIFERATION	30	-0.583732	-1.69728	0.00729927	0.0262346	1
GO_DENDRITIC_SPINE_HEAD	12	-0.726063	-1.69724	0.00758725	0.0262295	1
GO_POSITIVE_REGULATION_OF_ACTIN_CYTOSKELETON_REORGANIZATION	16	-0.671158	-1.69718	0.0151515	0.0262243	1
GO_REGULATION_OF_GLIAL_CELL_APOPTOTIC_PROCESS	10	-0.734462	-1.69711	0.0118044	0.0262264	1
GO_HEART_VALVE_DEVELOPMENT	58	-0.512431	-1.6971	0.00395257	0.0262156	1
GO_FILAMIN_BINDING	11	-0.726221	-1.69691	0.0111821	0.0262425	1
HP_PROPTOSIS	209	-0.434808	-1.6968	0	0.0262612	1
GO_NEGATIVE_REGULATION_OF_ESTABLISHMENT_OF_PROTEIN_LOCALIZATION	134	-0.454012	-1.69637	0	0.0263886	1
GO_RETINOL_DEHYDROGENASE_ACTIVITY	13	-0.679323	-1.69615	0.00963082	0.0264368	1
GO_CARDIAC_VENTRICLE_MORPHOGENESIS	59	-0.51033	-1.69605	0.00273224	0.0264491	1
HP_OCULAR_ANTERIOR_SEGMENT_DYSGENESIS	231	-0.432474	-1.69601	0	0.0264415	1
GO_POSITIVE_REGULATION_OF_MACROPHAGE_MIGRATION	22	-0.628035	-1.6957	0.00597907	0.0265261	1
GO_NEGATIVE_REGULATION_OF_CYTOKINE_SECRETION	23	-0.608775	-1.69569	0.00610687	0.0265104	1
GO_CYCLIC_NUCLEOTIDE_METABOLIC_PROCESS	36	-0.541752	-1.69564	0.00580551	0.0265122	1
HP_APLASIA_HYPOPLASIA_OF_THE_LUNGS	125	-0.455307	-1.69559	0.00120482	0.0265109	1
GO_RESPONSE_TO_NUTRIENT	143	-0.454184	-1.69554	0	0.0265111	1
GO_POSTSYNAPSE	546	-0.408331	-1.69539	0	0.0265336	1
HP_ABNORMALITY_OF_NEUTROPHILS	210	-0.432912	-1.6951	0	0.0265941	1
HP_PROXIMAL_TUBULOPATHY	51	-0.522811	-1.69401	0.00141443	0.0269183	1
GO_ATP_BIOSYNTHETIC_PROCESS	49	-0.52228	-1.69368	0.00407609	0.0269878	1
HP_PALMAR_HYPERHIDROSIS	13	-0.692962	-1.69343	0.0144928	0.0270439	1
HP_NAIL_DYSPLASIA	129	-0.457441	-1.69335	0.0011919	0.0270469	1
HP_SPINA_BIFIDA_OCCULTA	68	-0.49799	-1.69316	0.00269179	0.0270824	1
GO_POSITIVE_REGULATION_OF_BIOMINERALIZATION	41	-0.542418	-1.69314	0.00423131	0.0270696	1
GO_REGULATION_OF_ANTIGEN_RECEPTOR_MEDIATED_SIGNALING_PATHWAY	53	-0.515566	-1.6931	0.0065445	0.0270632	1
HP_SEVERE_GLOBAL_DEVELOPMENTAL_DELAY	119	-0.457185	-1.69305	0.00243605	0.0270543	1
GO_REGULATION_OF_NEUTROPHIL_CHEMOTAXIS	28	-0.58375	-1.69302	0.00918836	0.0270463	1
GO_CELL_MORPHOGENESIS_INVOLVED_IN_NEURON_DIFFERENTIATION	530	-0.405585	-1.69298	0	0.0270383	1
GO_REGULATION_OF_NEURON_PROJECTION_DEVELOPMENT	464	-0.41317	-1.69284	0	0.0270562	1
HP_HETEROCHROMIA_IRIDIS	17	-0.655618	-1.69224	0.00782473	0.027225	1
GO_MODULATION_OF_EXCITATORY_POSTSYNAPTIC_POTENTIAL	36	-0.554312	-1.69123	0.00582242	0.0274929	1
GO_SKIN_DEVELOPMENT	231	-0.427054	-1.69118	0	0.027483	1
GO_POSITIVE_REGULATION_OF_STRESS_FIBER_ASSEMBLY	48	-0.519416	-1.69111	0.0069735	0.0274849	1
HP_ABNORMALITY_OF_THE_TARSAL_BONES	81	-0.484428	-1.69093	0	0.0275205	1
GO_OUTWARD_RECTIFIER_POTASSIUM_CHANNEL_ACTIVITY	12	-0.713465	-1.69062	0.0046875	0.0275959	1
HP_ABNORMAL_AORTIC_MORPHOLOGY	227	-0.430392	-1.69059	0	0.0275852	1
GO_POSITIVE_REGULATION_OF_ANIMAL_ORGAN_MORPHOGENESIS	74	-0.483794	-1.69054	0.00263852	0.0275847	1
GO_VENTRICULAR_CARDIAC_MUSCLE_CELL_MEMBRANE_REPOLARIZATION	23	-0.616596	-1.6905	0.00607903	0.0275755	1
GO_HUMORAL_IMMUNE_RESPONSE_MEDIATED_BY_CIRCULATING_IMMUNOGLOBULIN	34	-0.561458	-1.68965	0.0057971	0.0277959	1
GO_POSITIVE_REGULATION_OF_NEUTROPHIL_MIGRATION	26	-0.597651	-1.6892	0.00297177	0.0278934	1
GO_EPITHELIAL_TUBE_MORPHOGENESIS	294	-0.420545	-1.68919	0	0.0278756	1
GO_CATION_TRANSMEMBRANE_TRANSPORT	714	-0.402701	-1.68915	0	0.0278662	1
GO_LEUKOCYTE_CELL_CELL_ADHESION	284	-0.420013	-1.68854	0	0.0280289	1
GO_LYMPHOCYTE_MEDIATED_IMMUNITY	201	-0.430818	-1.6881	0	0.0281477	1
GO_MATURE_B_CELL_DIFFERENTIATION_INVOLVED_IN_IMMUNE_RESPONSE	18	-0.645796	-1.68766	0.00465839	0.0282563	1
HP_ABNORMAL_ANTERIOR_CHAMBER_MORPHOLOGY	34	-0.561359	-1.68764	0.00719425	0.0282452	1
GO_TISSUE_REMODELING	147	-0.454976	-1.68749	0	0.0282698	1
GO_EOSINOPHIL_CHEMOTAXIS	13	-0.687644	-1.68746	0.00651466	0.0282618	1
GO_NEGATIVE_REGULATION_OF_MOLECULAR_FUNCTION	961	-0.399568	-1.68708	0	0.0283684	1
GO_REGULATION_OF_KIDNEY_DEVELOPMENT	50	-0.513182	-1.68702	0.0069735	0.0283681	1
GO_DEVELOPMENTAL_CELL_GROWTH	209	-0.436263	-1.68669	0	0.0284474	1
GO_NEGATIVE_REGULATION_OF_TUMOR_NECROSIS_FACTOR_MEDIATED_SIGNALING_PATHWAY	15	-0.665301	-1.68666	0.00788644	0.0284354	1
GO_HEMIDESMOSOME_ASSEMBLY	11	-0.718477	-1.68642	0.0132231	0.0285062	1
GO_AXIS_ELONGATION	25	-0.60594	-1.6864	0.00765697	0.0284903	1
GO_SCHAFFER_COLLATERAL_CA1_SYNAPSE	69	-0.494142	-1.68618	0.00132626	0.0285485	1
GO_NEGATIVE_REGULATION_OF_AXON_EXTENSION	38	-0.542096	-1.68594	0.00583942	0.028592	1
HP_ABNORMALITY_OF_BLOOD_CIRCULATION	245	-0.423627	-1.68569	0	0.0286515	1
GO_SENSORY_ORGAN_DEVELOPMENT	461	-0.40971	-1.68532	0	0.0287419	1
GO_INHIBITORY_POSTSYNAPTIC_POTENTIAL	15	-0.672692	-1.68527	0.0140187	0.0287421	1
HP_SKIN_PIT	50	-0.519662	-1.68503	0.0071736	0.0288039	1
GO_POSITIVE_REGULATION_OF_T_CELL_MEDIATED_IMMUNITY	44	-0.528452	-1.68495	0.00558659	0.0288139	1
HP_EMPHYSEMA	41	-0.536009	-1.68493	0.00570613	0.0288003	1
GO_MITOTIC_CYTOKINESIS	70	-0.49067	-1.6847	0.0025974	0.028861	1
HP_REDUCED_FORCED_VITAL_CAPACITY	10	-0.727129	-1.68459	0.0185185	0.0288672	1
GO_PROTEIN_SELF_ASSOCIATION	52	-0.525356	-1.68448	0.0014245	0.0288811	1
GO_SEQUESTERING_OF_CALCIUM_ION	97	-0.465433	-1.68447	0	0.0288674	1
HP_PAROXYSMAL_VENTRICULAR_TACHYCARDIA	24	-0.588619	-1.68415	0.00787402	0.0289593	1
GO_POSITIVE_REGULATION_OF_MONONUCLEAR_CELL_MIGRATION	15	-0.669657	-1.68375	0.0212418	0.0290556	1
GO_CELL_CELL_ADHESION_VIA_PLASMA_MEMBRANE_ADHESION_MOLECULES	222	-0.430124	-1.68352	0	0.0291113	1
GO_POSITIVE_REGULATION_OF_BONE_MINERALIZATION	36	-0.549687	-1.68344	0.0058651	0.0291089	1
HP_ABNORMAL_MORPHOLOGY_OF_MYOCARDIAL_TRABECULAE	16	-0.659669	-1.68336	0.00827815	0.029118	1
HP_BROAD_HALLUX_PHALANX	18	-0.638259	-1.68323	0.0178282	0.0291439	1
GO_SYNAPTIC_MEMBRANE_ADHESION	19	-0.640934	-1.68309	0.00934579	0.029159	1
HP_DECREASED_CIRCULATING_TOTAL_IGM	19	-0.638219	-1.68276	0.0141732	0.0292388	1
GO_ARP2_3_PROTEIN_COMPLEX	11	-0.720165	-1.68273	0.00996678	0.0292256	1
GO_CARDIAC_MUSCLE_CELL_CONTRACTION	65	-0.492033	-1.68262	0.00404313	0.0292482	1
GO_NEGATIVE_REGULATION_OF_LYMPHOCYTE_ACTIVATION	109	-0.46021	-1.68261	0.00126582	0.0292329	1
GO_REGULATION_OF_FILOPODIUM_ASSEMBLY	41	-0.539723	-1.68256	0.0041958	0.0292221	1
GO_PROTEIN_LOCALIZATION_TO_KINETOCHORE	18	-0.642516	-1.68245	0.00941915	0.029228	1
GO_SOMATODENDRITIC_COMPARTMENT	730	-0.401721	-1.68222	0	0.0292778	1
HP_HOARSE_VOICE	68	-0.494716	-1.68208	0.00392157	0.0293018	1
GO_NEUROMUSCULAR_JUNCTION_DEVELOPMENT	47	-0.52194	-1.68175	0.00552486	0.0293925	1
GO_PROTEIN_KINASE_C_BINDING	50	-0.524184	-1.68169	0	0.0293914	1
GO_NEGATIVE_REGULATION_OF_LYMPHOCYTE_APOPTOTIC_PROCESS	25	-0.603991	-1.68162	0.00946372	0.0293897	1
GO_ENDOCHONDRAL_BONE_MORPHOGENESIS	50	-0.518587	-1.68161	0.00423131	0.029372	1
GO_REGULATION_OF_NON_CANONICAL_WNT_SIGNALING_PATHWAY	22	-0.607167	-1.68157	0.0089955	0.0293664	1
GO_POSITIVE_REGULATION_OF_NEURAL_PRECURSOR_CELL_PROLIFERATION	43	-0.534239	-1.68143	0.00289017	0.0293858	1
HP_POLYHYDRAMNIOS	177	-0.441041	-1.68102	0	0.0294993	1
GO_BONE_REMODELING	82	-0.474497	-1.6809	0.00134048	0.0295118	1
GO_ENDOCRINE_HORMONE_SECRETION	40	-0.542699	-1.68071	0.00567376	0.02954	1
HP_MYELOMENINGOCELE	21	-0.620104	-1.68051	0.00308642	0.0295863	1
GO_POSITIVE_REGULATION_OF_VASCULAR_ASSOCIATED_SMOOTH_MUSCLE_CELL_PROLIFERATION	32	-0.563159	-1.68005	0.011713	0.0296985	1
HP_EXERTIONAL_DYSPNEA	81	-0.483003	-1.67949	0.00126743	0.0298657	1
GO_RESPONSE_TO_LEPTIN	19	-0.631069	-1.67939	0.00793651	0.0298741	1
HP_SINUS_BRADYCARDIA	18	-0.631761	-1.6791	0.00316456	0.02995	1
GO_MIDDLE_EAR_MORPHOGENESIS	19	-0.625027	-1.67903	0.0107527	0.0299493	1
GO_REGULATION_OF_DEVELOPMENTAL_GROWTH	298	-0.415366	-1.67855	0	0.0300796	1
GO_ADAPTIVE_IMMUNE_RESPONSE_BASED_ON_SOMATIC_RECOMBINATION_OF_IMMUNE_RECEPTORS_BUILT_FROM_IMMUNOGLOBULIN_SUPERFAMILY_DOMAINS	217	-0.425672	-1.67787	0	0.030287	1
HP_ABNORMALITY_OF_THE_CALF_MUSCULATURE	60	-0.499717	-1.67767	0.00682128	0.0303264	1
GO_NEGATIVE_REGULATION_OF_SUPRAMOLECULAR_FIBER_ORGANIZATION	136	-0.442375	-1.67756	0	0.0303375	1
HP_LOWER_LIMB_ASYMMETRY	22	-0.615528	-1.6775	0.014881	0.030338	1
HP_TONGUE_ATROPHY	10	-0.744039	-1.67736	0.00679117	0.0303862	1
HP_HYPERLORDOSIS	165	-0.435486	-1.67708	0.00116144	0.0304397	1
HP_MICROGLOSSIA	15	-0.660397	-1.67687	0.0128617	0.0304827	1
HP_ABNORMAL_URINE_PROTEIN_LEVEL	179	-0.435733	-1.67669	0	0.0305175	1
HP_ABNORMAL_ST_SEGMENT	26	-0.582578	-1.67663	0.00457317	0.0305201	1
GO_TYROSINE_PHOSPHORYLATION_OF_STAT_PROTEIN	62	-0.493553	-1.67646	0.00398406	0.0305577	1
GO_NEGATIVE_REGULATION_OF_AMINE_TRANSPORT	19	-0.637385	-1.67621	0.00972447	0.0306317	1
GO_MEMBRANE_REPOLARIZATION_DURING_ACTION_POTENTIAL	24	-0.592914	-1.67602	0.00763359	0.0306856	1
GO_RENAL_WATER_HOMEOSTASIS	27	-0.579141	-1.67598	0.00892857	0.030683	1
HP_ABNORMALITY_OF_THE_ANTERIOR_FONTANELLE	90	-0.473583	-1.67597	0.00128535	0.0306625	1
GO_AMYLOID_FIBRIL_FORMATION	16	-0.664706	-1.6757	0.00916031	0.0307361	1
GO_CELL_GROWTH	441	-0.406903	-1.67569	0	0.0307209	1
GO_ENDOPEPTIDASE_REGULATOR_ACTIVITY	131	-0.449213	-1.67556	0	0.0307337	1
GO_PATHWAY_RESTRICTED_SMAD_PROTEIN_PHOSPHORYLATION	55	-0.510017	-1.67542	0.00535475	0.0307518	1
GO_PEPTIDE_CATABOLIC_PROCESS	24	-0.594795	-1.67445	0.01059	0.0310625	1
HP_VASCULAR_SKIN_ABNORMALITY	430	-0.410058	-1.67434	0	0.0310766	1
GO_HEPARAN_SULFATE_PROTEOGLYCAN_BINDING	13	-0.68845	-1.67415	0.00958466	0.0311208	1
GO_POSTSYNAPTIC_SPECIALIZATION_MEMBRANE	91	-0.476756	-1.67393	0.00125156	0.0311732	1
GO_MEMBRANE_DISASSEMBLY	16	-0.650503	-1.67391	0.0139969	0.0311606	1
GO_REGULATION_OF_CELL_PROLIFERATION_INVOLVED_IN_KIDNEY_DEVELOPMENT	12	-0.716175	-1.67382	0.00944882	0.0311672	1
GO_REGULATION_OF_EXCRETION	20	-0.623504	-1.67375	0.00314961	0.0311701	1
GO_PROTEIN_LOCALIZATION_TO_PLASMA_MEMBRANE	251	-0.419371	-1.67365	0	0.0311774	1
GO_METAL_ION_TRANSPORT	718	-0.39857	-1.67356	0	0.0311913	1
GO_REGULATION_OF_CELL_COMMUNICATION_BY_ELECTRICAL_COUPLING	12	-0.697544	-1.67355	0.0127796	0.0311737	1
HP_PES_PLANUS	259	-0.420561	-1.67344	0	0.0311839	1
GO_HEAD_DEVELOPMENT	661	-0.403358	-1.67334	0	0.0312036	1
GO_INTERMEDIATE_FILAMENT_CYTOSKELETON	114	-0.460208	-1.67309	0	0.0312557	1
HP_SICK_SINUS_SYNDROME	24	-0.595836	-1.67261	0.015361	0.0313721	1
GO_MEMORY	105	-0.458406	-1.67258	0.00122699	0.0313588	1
GO_LEUKOCYTE_PROLIFERATION	233	-0.424624	-1.67248	0	0.0313761	1
GO_CALCIUM_CHANNEL_COMPLEX	60	-0.502934	-1.67241	0	0.0313906	1
HP_ABNORMALITY_OF_THE_PHALANGES_OF_THE_HALLUX	36	-0.543724	-1.67224	0.00283286	0.031424	1
GO_REGULATION_OF_KERATINOCYTE_PROLIFERATION	27	-0.580032	-1.67207	0.00909091	0.0314661	1
GO_GLYCOSYLCERAMIDE_METABOLIC_PROCESS	16	-0.65022	-1.67193	0.0145396	0.0314842	1
GO_ADRENAL_GLAND_DEVELOPMENT	20	-0.628779	-1.67193	0.00936037	0.0314628	1
GO_REGULATION_OF_SYNAPTIC_TRANSMISSION_GABAERGIC	30	-0.576816	-1.67157	0.00944882	0.031558	1
GO_POSITIVE_REGULATION_OF_CELL_MATRIX_ADHESION	49	-0.506521	-1.6713	0.0122283	0.0316269	1
GO_CELLULAR_RESPONSE_TO_OXYGEN_LEVELS	209	-0.426727	-1.67087	0	0.0317465	1
GO_POSITIVE_REGULATION_OF_MITOTIC_CELL_CYCLE	144	-0.44123	-1.66998	0	0.0320247	1
GO_POSITIVE_REGULATION_OF_NEUROBLAST_PROLIFERATION	19	-0.615877	-1.66983	0.0164745	0.0320531	1
GO_SKELETAL_MUSCLE_TISSUE_REGENERATION	32	-0.563154	-1.66926	0.0115942	0.032216	1
GO_FOREBRAIN_DEVELOPMENT	313	-0.414673	-1.66918	0	0.0322225	1
GO_POLY_N_ACETYLLACTOSAMINE_METABOLIC_PROCESS	11	-0.710493	-1.66906	0.0100503	0.0322363	1
GO_RETINA_VASCULATURE_DEVELOPMENT_IN_CAMERA_TYPE_EYE	16	-0.657983	-1.6685	0.0126183	0.0323905	1
GO_REGULATION_OF_NATURAL_KILLER_CELL_DIFFERENTIATION	10	-0.73229	-1.66835	0.0053286	0.032431	1
GO_VASCULAR_ASSOCIATED_SMOOTH_MUSCLE_CONTRACTION	21	-0.602456	-1.66806	0.00629921	0.0324902	1
HP_DECREASED_LYMPHOCYTE_PROLIFERATION_IN_RESPONSE_TO_MITOGEN	12	-0.683926	-1.66791	0.0157233	0.0325196	1
GO_SMALL_GTPASE_MEDIATED_SIGNAL_TRANSDUCTION	474	-0.400373	-1.66774	0	0.0325649	1
GO_CATION_TRANSPORTING_ATPASE_COMPLEX	15	-0.662177	-1.66765	0.0119454	0.0325661	1
GO_RESPONSE_TO_KETONE	172	-0.429131	-1.66761	0	0.0325572	1
HP_ABNORMALITY_OF_THE_ZYGOMATIC_BONE	205	-0.426007	-1.66713	0	0.0326961	1
HP_ASYMMETRIC_GROWTH	39	-0.536205	-1.66683	0.00718391	0.0327873	1
GO_IMMUNE_EFFECTOR_PROCESS	990	-0.390947	-1.6668	0	0.0327704	1
GO_NEGATIVE_REGULATION_OF_MORPHOGENESIS_OF_AN_EPITHELIUM	14	-0.671504	-1.66668	0.0153584	0.0327923	1
GO_REGULATION_OF_VIRAL_GENOME_REPLICATION	92	-0.462655	-1.66659	0.00124688	0.032807	1
HP_ABNORMAL_LARGE_INTESTINE_MORPHOLOGY	190	-0.434511	-1.66631	0	0.0328728	1
HP_SUPRAVENTRICULAR_TACHYCARDIA	34	-0.554908	-1.6654	0.0115607	0.0331545	1
GO_POSITIVE_REGULATION_OF_STEM_CELL_PROLIFERATION	36	-0.553049	-1.66536	0.00720461	0.0331424	1
GO_POSITIVE_REGULATION_OF_NATURAL_KILLER_CELL_MEDIATED_CYTOTOXICITY	17	-0.635093	-1.66535	0.012945	0.0331231	1
GO_BEHAVIOR	478	-0.401578	-1.66515	0	0.0331641	1
GO_MODIFICATION_OF_POSTSYNAPTIC_STRUCTURE	17	-0.639483	-1.66513	0.00796178	0.0331478	1
GO_POSITIVE_REGULATION_OF_CARDIAC_MUSCLE_CELL_DIFFERENTIATION	19	-0.636039	-1.66506	0.0167785	0.0331493	1
GO_CELL_MIGRATION_INVOLVED_IN_SPROUTING_ANGIOGENESIS	58	-0.503176	-1.66481	0.00263852	0.0332016	1
HP_GLOSSOPTOSIS	23	-0.598104	-1.6648	0.0138462	0.0331824	1
GO_NEGATIVE_REGULATION_OF_EMBRYONIC_DEVELOPMENT	23	-0.601421	-1.66478	0.00618238	0.0331682	1
HP_SYNOSTOSIS_INVOLVING_BONES_OF_THE_HAND	35	-0.549063	-1.66443	0.00867052	0.0332553	1
GO_REGULATION_OF_GROWTH	598	-0.397954	-1.6643	0	0.0332803	1
GO_HEAD_MORPHOGENESIS	33	-0.552611	-1.66414	0.00984529	0.0333245	1
GO_CYTOSKELETON_DEPENDENT_CYTOKINESIS	84	-0.469899	-1.66405	0.00128866	0.0333352	1
GO_REGULATION_OF_MUSCLE_CELL_DIFFERENTIATION	144	-0.440182	-1.66403	0.00118765	0.0333152	1
GO_MOTOR_ACTIVITY	117	-0.448066	-1.6638	0	0.0333856	1
HP_GERMINOMA	11	-0.713404	-1.66373	0.012966	0.0333785	1
GO_MULTICELLULAR_ORGANISMAL_RESPONSE_TO_STRESS	55	-0.51107	-1.66317	0.00418994	0.0335625	1
HP_ABNORMALITY_OF_PANCREAS_PHYSIOLOGY	123	-0.452492	-1.66304	0.00233372	0.0335814	1
GO_MYOTUBE_DIFFERENTIATION	92	-0.464997	-1.663	0.00125786	0.0335741	1
HP_MUSCLE_FIBER_ATROPHY	43	-0.521575	-1.66286	0.00703235	0.0335995	1
GO_MORPHOGENESIS_OF_A_BRANCHING_STRUCTURE	179	-0.433931	-1.6625	0	0.0336929	1
GO_LYMPHOCYTE_DIFFERENTIATION	296	-0.40894	-1.6624	0	0.0337074	1
HP_CUTIS_LAXA	85	-0.469771	-1.66238	0.00128535	0.0336908	1
GO_NEURON_PROJECTION_REGENERATION	52	-0.513078	-1.66199	0.00413793	0.0338158	1
GO_MITOTIC_SPINDLE_ORGANIZATION	116	-0.451563	-1.66194	0	0.0338098	1
GO_CHRONIC_INFLAMMATORY_RESPONSE	14	-0.669512	-1.66179	0.015025	0.0338449	1
GO_RESPONSE_TO_FIBROBLAST_GROWTH_FACTOR	125	-0.453846	-1.66179	0.00120337	0.0338247	1
GO_GLYCOSPHINGOLIPID_BIOSYNTHETIC_PROCESS	23	-0.586912	-1.66177	0.010479	0.0338075	1
GO_RESPONSE_TO_INCREASED_OXYGEN_LEVELS	27	-0.575245	-1.66168	0.0102041	0.0338149	1
GO_BONE_CELL_DEVELOPMENT	31	-0.559133	-1.66163	0.00907716	0.0338132	1
HP_HYPEROSTOSIS	51	-0.518652	-1.66155	0.00281294	0.0338114	1
GO_REGULATION_OF_PROTEIN_LOCALIZATION_TO_CELL_PERIPHERY	110	-0.456457	-1.66117	0.00124069	0.0339146	1
GO_KIDNEY_EPITHELIUM_DEVELOPMENT	122	-0.452489	-1.66114	0	0.0339022	1
GO_CYTOKINE_MEDIATED_SIGNALING_PATHWAY	637	-0.399168	-1.66089	0	0.0339819	1
HP_HEADACHE	275	-0.413881	-1.66071	0	0.0340237	1
HP_ABSCESS	23	-0.591299	-1.66063	0.00764526	0.034033	1
GO_POSITIVE_REGULATION_OF_POTASSIUM_ION_TRANSPORT	37	-0.537659	-1.66018	0.00436047	0.0341693	1
GO_CENTRAL_NERVOUS_SYSTEM_NEURON_DEVELOPMENT	70	-0.485985	-1.65998	0.00384123	0.0342234	1
GO_RESPIRATORY_CHAIN_COMPLEX_III	14	-0.66141	-1.65993	0.019802	0.0342164	1
HP_LARGE_FLESHY_EARS	11	-0.698739	-1.65974	0.0150754	0.0342508	1
GO_POSITIVE_REGULATION_OF_PROTEIN_BINDING	76	-0.474315	-1.65974	0.00656168	0.0342285	1
HP_ANKYLOSIS	19	-0.624571	-1.6596	0.0188679	0.03426	1
HP_APLASIA_HYPOPLASIA_OF_THE_SACRUM	11	-0.704697	-1.65922	0.0130081	0.0343719	1
GO_SODIUM_ION_TRANSMEMBRANE_TRANSPORT	135	-0.443803	-1.65922	0	0.0343496	1
GO_ELECTRON_TRANSPORT_CHAIN	171	-0.433853	-1.65877	0	0.0344842	1
GO_POSITIVE_REGULATION_OF_MUSCLE_TISSUE_DEVELOPMENT	61	-0.503334	-1.65857	0.00809717	0.0345357	1
GO_POSITIVE_REGULATION_OF_LYMPHOCYTE_ACTIVATION	242	-0.419166	-1.65854	0	0.0345308	1
GO_T_CELL_DIFFERENTIATION	212	-0.426695	-1.65843	0	0.0345432	1
HP_ABNORMALITY_OF_THE_PLANTAR_SKIN_OF_FOOT	64	-0.492603	-1.65811	0.0013587	0.0346246	1
GO_REGULATION_OF_AMINO_ACID_IMPORT_ACROSS_PLASMA_MEMBRANE	11	-0.705905	-1.65808	0.0144231	0.0346091	1
GO_HYALURONAN_METABOLIC_PROCESS	33	-0.557487	-1.65799	0.00735294	0.0346159	1
HP_IMPAIRED_PAIN_SENSATION	39	-0.539204	-1.65787	0.00290698	0.0346358	1
GO_REGULATION_OF_FIBROBLAST_MIGRATION	32	-0.558575	-1.65771	0.00451807	0.034669	1
GO_NEURON_RECOGNITION	44	-0.526511	-1.65767	0.00424929	0.0346597	1
GO_REGULATION_OF_ANIMAL_ORGAN_MORPHOGENESIS	226	-0.418043	-1.65762	0	0.0346527	1
HP_BLADDER_DIVERTICULUM	19	-0.630755	-1.6576	0.00465116	0.0346379	1
GO_POSITIVE_REGULATION_OF_NEURON_PROJECTION_DEVELOPMENT	261	-0.416708	-1.65759	0	0.0346176	1
GO_GAS_TRANSPORT	10	-0.708659	-1.65754	0.0205128	0.034612	1
HP_ABNORMAL_CSF_PROTEIN_LEVEL	43	-0.53761	-1.65747	0.00827586	0.0346118	1
GO_N_ACETYLLACTOSAMINIDE_BETA_1_3_N_ACETYLGLUCOSAMINYLTRANSFERASE_ACTIVITY	10	-0.738144	-1.65738	0.0169205	0.0346116	1
GO_POSITIVE_REGULATION_OF_SECRETION	300	-0.412275	-1.65737	0	0.0345976	1
GO_CELLULAR_RESPONSE_TO_ACID_CHEMICAL	72	-0.477029	-1.65698	0.0026455	0.0347388	1
GO_APOPTOTIC_CELL_CLEARANCE	42	-0.530967	-1.65686	0.00841515	0.0347593	1
GO_CADHERIN_BINDING	307	-0.407446	-1.65659	0	0.0348369	1
GO_NEUROTROPHIN_TRK_RECEPTOR_SIGNALING_PATHWAY	33	-0.552968	-1.65648	0.00874636	0.0348607	1
GO_REGULATION_OF_LEUKOCYTE_MEDIATED_CYTOTOXICITY	52	-0.50301	-1.65643	0.00829876	0.0348562	1
GO_NEGATIVE_REGULATION_OF_PEPTIDYL_TYROSINE_PHOSPHORYLATION	46	-0.523982	-1.6563	0.00140056	0.0348861	1
GO_POSITIVE_REGULATION_OF_CYTOKINE_PRODUCTION_INVOLVED_IN_IMMUNE_RESPONSE	48	-0.509793	-1.65607	0.00702247	0.0349394	1
GO_DETECTION_OF_TEMPERATURE_STIMULUS_INVOLVED_IN_SENSORY_PERCEPTION	17	-0.642167	-1.65592	0.00471698	0.0349658	1
GO_NOREPINEPHRINE_SECRETION	12	-0.701755	-1.65559	0.0162602	0.0350746	1
HP_MIXED_HEARING_IMPAIRMENT	20	-0.615652	-1.65559	0.0096463	0.0350549	1
GO_POSITIVE_REGULATION_OF_LEUKOCYTE_DIFFERENTIATION	139	-0.440069	-1.65554	0	0.0350538	1
GO_MULTI_MULTICELLULAR_ORGANISM_PROCESS	182	-0.431694	-1.65546	0	0.0350616	1
GO_AMINE_TRANSPORT	70	-0.481468	-1.65545	0.00129366	0.035042	1
GO_REGULATION_OF_SIGNALING_RECEPTOR_ACTIVITY	129	-0.446988	-1.65528	0.00119332	0.0350901	1
GO_POSITIVE_REGULATION_OF_RECEPTOR_MEDIATED_ENDOCYTOSIS	45	-0.523057	-1.65515	0.00581395	0.0351218	1
HP_HYDROCELE_TESTIS	13	-0.671173	-1.65503	0.0212072	0.0351397	1
GO_PROTEIN_TRIMERIZATION	15	-0.652182	-1.65477	0.0125786	0.0352136	1
GO_POSITIVE_REGULATION_OF_PROTEIN_DEPOLYMERIZATION	18	-0.627885	-1.65467	0.00605144	0.0352308	1
GO_REGULATION_OF_EXTRACELLULAR_MATRIX_ASSEMBLY	14	-0.663411	-1.65444	0.0144695	0.0352985	1
GO_PHOSPHORUS_OXYGEN_LYASE_ACTIVITY	20	-0.605938	-1.65408	0.0125196	0.0354322	1
GO_CYTOKINE_PRODUCTION	652	-0.394549	-1.6539	0	0.0354833	1
GO_REGULATION_OF_RESPIRATORY_GASEOUS_EXCHANGE	19	-0.631154	-1.65359	0.0030581	0.0355725	1
GO_CATION_TRANSPORT	940	-0.39243	-1.6535	0	0.0355792	1
HP_THROMBOEMBOLISM	24	-0.590414	-1.65348	0.0160584	0.0355683	1
GO_REGULATION_OF_ENDOCRINE_PROCESS	37	-0.545505	-1.65345	0.00582242	0.0355607	1
GO_REGULATION_OF_ANION_TRANSMEMBRANE_TRANSPORT	29	-0.55696	-1.65297	0.00877193	0.0357243	1
GO_CALCIUM_ION_TRANSMEMBRANE_TRANSPORT_VIA_HIGH_VOLTAGE_GATED_CALCIUM_CHANNEL	12	-0.71186	-1.65286	0.00823723	0.0357445	1
HP_KYPHOSCOLIOSIS	149	-0.433578	-1.65253	0	0.0358596	1
GO_HIPPOCAMPAL_MOSSY_FIBER_TO_CA3_SYNAPSE	27	-0.568269	-1.65244	0.00998574	0.0358648	1
GO_REGULATION_OF_SECRETION	590	-0.394774	-1.65239	0	0.035855	1
GO_POSITIVE_REGULATION_OF_MONOCYTE_DIFFERENTIATION	11	-0.716252	-1.65235	0.0103986	0.0358391	1
GO_ENDOPEPTIDASE_ACTIVITY	309	-0.410277	-1.65202	0	0.0359513	1
GO_POSITIVE_REGULATION_OF_NATURAL_KILLER_CELL_MEDIATED_IMMUNITY	20	-0.633033	-1.65174	0.00625978	0.0360355	1
HP_SYNOSTOSIS_OF_METACARPALS_METATARSALS	12	-0.710601	-1.65126	0.0109204	0.0361892	1
HP_PES_VALGUS	30	-0.565943	-1.65098	0.0115774	0.0362732	1
GO_POSITIVE_REGULATION_OF_VOLTAGE_GATED_CALCIUM_CHANNEL_ACTIVITY	13	-0.684275	-1.65083	0.0126183	0.0363078	1
HP_BROAD_FOOT	33	-0.548114	-1.65052	0.017316	0.0363957	1
GO_CENTRAL_NERVOUS_SYSTEM_NEURON_AXONOGENESIS	34	-0.548204	-1.65029	0.00718391	0.0364477	1
GO_ADHERENS_JUNCTION_ASSEMBLY	12	-0.694072	-1.65023	0.0220339	0.0364343	1
GO_NEGATIVE_REGULATION_OF_CALCIUM_ION_TRANSPORT	47	-0.510434	-1.64993	0.00985915	0.0365304	1
GO_REGULATION_OF_EXTRACELLULAR_MATRIX_DISASSEMBLY	15	-0.667212	-1.64992	0.0175159	0.0365122	1
HP_ABNORMAL_BLISTERING_OF_THE_SKIN	64	-0.491494	-1.64984	0.00801068	0.036525	1
GO_MITOCHONDRIAL_RESPIRATORY_CHAIN_COMPLEX_IV	11	-0.707248	-1.64975	0.00705467	0.0365304	1
GO_REGULATION_OF_CARDIAC_MUSCLE_CELL_MEMBRANE_REPOLARIZATION	23	-0.586838	-1.64962	0.020155	0.0365518	1
GO_DENDRITE_MEMBRANE	33	-0.556155	-1.64945	0.011236	0.0365954	1
GO_POSITIVE_REGULATION_OF_GRANULOCYTE_CHEMOTAXIS	23	-0.58739	-1.64942	0.0215054	0.0365792	1
GO_POSTSYNAPSE_ORGANIZATION	155	-0.433722	-1.6494	0.00117925	0.0365617	1
GO_REGULATION_OF_PROTEIN_KINASE_ACTIVITY	713	-0.395706	-1.64935	0	0.0365604	1
HP_MUSCULAR_DYSTROPHY	75	-0.483063	-1.64933	0.00265604	0.0365436	1
HP_CONGENITAL_MUSCULAR_DYSTROPHY	19	-0.616306	-1.64928	0.0132743	0.0365463	1
GO_LYMPH_VESSEL_DEVELOPMENT	24	-0.578641	-1.64913	0.00918836	0.0365823	1
GO_CELL_BODY	496	-0.401558	-1.64913	0	0.0365616	1
HP_CHRONIC_NONINFECTIOUS_LYMPHADENOPATHY	10	-0.735202	-1.649	0.0130506	0.0365836	1
GO_REGULATION_OF_T_HELPER_1_TYPE_IMMUNE_RESPONSE	23	-0.594742	-1.64893	0.0124031	0.0365822	1
GO_EPHRIN_RECEPTOR_BINDING	25	-0.58712	-1.64866	0.0106707	0.0366622	1
GO_PROTEIN_LOCALIZATION_TO_CHROMOSOME_CENTROMERIC_REGION	22	-0.603192	-1.64816	0.00761035	0.0368416	1
GO_NEGATIVE_REGULATION_OF_HYDROLASE_ACTIVITY	363	-0.404287	-1.64811	0	0.0368453	1
GO_NITRIC_OXIDE_MEDIATED_SIGNAL_TRANSDUCTION	25	-0.581361	-1.64807	0.00896861	0.0368372	1
GO_NEGATIVE_REGULATION_OF_CARDIAC_MUSCLE_TISSUE_DEVELOPMENT	35	-0.541976	-1.64805	0.0161527	0.0368196	1
GO_REGULATION_OF_CELL_MIGRATION_INVOLVED_IN_SPROUTING_ANGIOGENESIS	42	-0.524912	-1.64802	0.00829876	0.0368128	1
GO_MITOCHONDRIAL_CALCIUM_ION_HOMEOSTASIS	24	-0.581409	-1.64792	0.0109034	0.0368299	1
GO_SCHWANN_CELL_DIFFERENTIATION	36	-0.544158	-1.64736	0.00981767	0.0370362	1
GO_CELLULAR_RESPONSE_TO_EXOGENOUS_DSRNA	16	-0.65035	-1.6473	0.0108865	0.0370325	1
HP_ABNORMAL_CARDIAC_VENTRICLE_MORPHOLOGY	463	-0.400234	-1.64721	0	0.0370355	1
GO_PARENTAL_BEHAVIOR	10	-0.724842	-1.6472	0.0121528	0.0370159	1
GO_METAL_ION_TRANSMEMBRANE_TRANSPORTER_ACTIVITY	335	-0.406403	-1.64686	0	0.0371137	1
HP_AXIAL_MUSCLE_WEAKNESS	24	-0.587788	-1.64676	0.0135338	0.0371259	1
GO_MORPHOGENESIS_OF_AN_EPITHELIAL_FOLD	19	-0.617799	-1.64668	0.011254	0.0371362	1
GO_FC_RECEPTOR_MEDIATED_STIMULATORY_SIGNALING_PATHWAY	82	-0.471437	-1.64667	0.00128041	0.0371173	1
GO_PHOSPHOLIPASE_C_ACTIVATING_G_PROTEIN_COUPLED_RECEPTOR_SIGNALING_PATHWAY	68	-0.486009	-1.64656	0.00132979	0.0371381	1
HP_MUSCLE_HYPERTROPHY_OF_THE_LOWER_EXTREMITIES	43	-0.528438	-1.64633	0.00429799	0.0371945	1
GO_SPINDLE_MIDZONE	35	-0.546795	-1.64623	0.014245	0.0372126	1
GO_CARBOHYDRATE_BIOSYNTHETIC_PROCESS	184	-0.428398	-1.64591	0.0011534	0.0373256	1
HP_SHORT_COLUMELLA	15	-0.662661	-1.64587	0.0109375	0.0373113	1
GO_PROTEIN_LOCALIZATION_TO_EARLY_ENDOSOME	10	-0.715183	-1.64579	0.0236088	0.0373187	1
GO_KINASE_INHIBITOR_ACTIVITY	62	-0.482255	-1.64574	0.00798935	0.0373182	1
HP_DIMPLE_CHIN	14	-0.66028	-1.64566	0.00996678	0.0373203	1
GO_REGULATION_OF_HEMOPOIESIS	406	-0.400755	-1.64563	0	0.0373067	1
GO_REGULATION_OF_RESPONSE_TO_CYTOKINE_STIMULUS	156	-0.424805	-1.64553	0	0.0373213	1
HP_RIGHT_BUNDLE_BRANCH_BLOCK	36	-0.539861	-1.64507	0.00990099	0.0374627	1
GO_INTERMEDIATE_FILAMENT_ORGANIZATION	17	-0.627017	-1.64506	0.0174326	0.0374437	1
HP_ABNORMALITY_OF_FLUID_REGULATION	403	-0.396827	-1.64505	0	0.0374215	1
GO_POSITIVE_REGULATION_OF_T_CELL_CYTOKINE_PRODUCTION	19	-0.614019	-1.64482	0.0123267	0.0374753	1
GO_SEQUESTERING_OF_ACTIN_MONOMERS	10	-0.727425	-1.6448	0.00343053	0.0374584	1
GO_TELENCEPHALON_DEVELOPMENT	214	-0.420525	-1.64478	0	0.0374434	1
GO_REGULATION_OF_PRESYNAPSE_ORGANIZATION	23	-0.60296	-1.64478	0.0190476	0.0374238	1
GO_POSITIVE_REGULATION_OF_AXON_EXTENSION	40	-0.528522	-1.64473	0.017094	0.0374161	1
GO_CELLULAR_RESPONSE_TO_NUTRIENT	37	-0.530104	-1.64469	0.00686813	0.037409	1
GO_RESPONSE_TO_PROGESTERONE	39	-0.521722	-1.64448	0.0147275	0.0374751	1
HP_ABNORMALITY_OF_THE_CARPAL_BONES	68	-0.484649	-1.64433	0.00265252	0.0374987	1
GO_CYTOSOLIC_CALCIUM_ION_TRANSPORT	137	-0.440937	-1.64431	0.00122399	0.0374863	1
GO_POSITIVE_REGULATION_OF_MEGAKARYOCYTE_DIFFERENTIATION	10	-0.718901	-1.64417	0.0185811	0.0375203	1
GO_EPIBOLY	30	-0.563613	-1.64411	0.00904977	0.0375197	1
HP_ABNORMALITY_OF_CORNEAL_SIZE	133	-0.438614	-1.644	0	0.0375354	1
GO_NEGATIVE_REGULATION_OF_TISSUE_REMODELING	19	-0.609735	-1.64378	0.0172956	0.0375861	1
GO_CELL_TRAILING_EDGE	13	-0.655459	-1.64345	0.0179153	0.0376831	1
GO_CARDIAC_MUSCLE_CELL_MEMBRANE_REPOLARIZATION	32	-0.546305	-1.64343	0.0161765	0.0376668	1
GO_POSITIVE_REGULATION_OF_CYTOSOLIC_CALCIUM_ION_CONCENTRATION_INVOLVED_IN_PHOSPHOLIPASE_C_ACTIVATING_G_PROTEIN_COUPLED_SIGNALING_PATHWAY	25	-0.586613	-1.6434	0.00917431	0.037655	1
GO_POSITIVE_REGULATION_OF_HORMONE_SECRETION	95	-0.46023	-1.64322	0.00126904	0.0377049	1
GO_TERPENOID_METABOLIC_PROCESS	83	-0.468932	-1.64317	0.00377358	0.0376964	1
GO_NEUROBLAST_PROLIFERATION	49	-0.509859	-1.6431	0.0055788	0.0377047	1
HP_RETINAL_DETACHMENT	80	-0.471771	-1.64309	0.00260078	0.0376852	1
GO_CYCLIC_NUCLEOTIDE_BIOSYNTHETIC_PROCESS	19	-0.619642	-1.64272	0.0112903	0.0378037	1
HP_ABNORMAL_RENAL_CORTEX_MORPHOLOGY	171	-0.431554	-1.64271	0	0.0377841	1
GO_SULFATION	13	-0.669118	-1.6426	0.0268987	0.0378072	1
GO_NEGATIVE_REGULATION_OF_PROTEIN_CONTAINING_COMPLEX_ASSEMBLY	128	-0.439668	-1.64223	0.00242718	0.0379319	1
GO_RESPONSE_TO_CYTOKINE	994	-0.389175	-1.64205	0	0.0379802	1
GO_VASCULAR_WOUND_HEALING	15	-0.656	-1.64186	0.0118871	0.0380264	1
GO_MOLECULAR_TRANSDUCER_ACTIVITY	809	-0.389755	-1.64164	0	0.0380887	1
GO_POSITIVE_REGULATION_OF_ENDOCYTOSIS	91	-0.459282	-1.64147	0.00125313	0.0381194	1
GO_NEGATIVE_REGULATION_OF_RESPONSE_TO_CYTOKINE_STIMULUS	52	-0.505329	-1.64141	0.00409277	0.0381261	1
GO_MESONEPHROS_DEVELOPMENT	88	-0.461662	-1.64121	0.00508906	0.0381805	1
GO_MECHANOSENSITIVE_ION_CHANNEL_ACTIVITY	15	-0.664383	-1.64067	0.029549	0.0383514	1
GO_INNATE_IMMUNE_RESPONSE	661	-0.392271	-1.64036	0	0.0384436	1
GO_TYPE_2_IMMUNE_RESPONSE	29	-0.55828	-1.64031	0.0118871	0.0384425	1
HP_EMG_MYOPATHIC_ABNORMALITIES	99	-0.452694	-1.63979	0.0025974	0.0386052	1
GO_HISTONE_EXCHANGE	41	-0.52826	-1.63969	0.0056338	0.0386251	1
GO_POSITIVE_REGULATION_OF_BLOOD_VESSEL_DIAMETER	51	-0.501578	-1.63949	0.0124309	0.0386797	1
HP_TELECANTHUS	122	-0.445164	-1.63943	0.00119617	0.0386739	1
HP_CONGENITAL_MALFORMATION_OF_THE_GREAT_ARTERIES	302	-0.406435	-1.63919	0	0.0387501	1
GO_FOREBRAIN_GENERATION_OF_NEURONS	42	-0.522365	-1.63873	0.00567376	0.0389051	1
HP_WEAK_CRY	35	-0.540875	-1.63864	0.0133531	0.0389171	1
GO_RIBONUCLEOSIDE_TRIPHOSPHATE_BIOSYNTHETIC_PROCESS	65	-0.485311	-1.63861	0.0066313	0.0389105	1
GO_ION_TRANSMEMBRANE_TRANSPORT	935	-0.389997	-1.63855	0	0.0389129	1
GO_DIGESTIVE_SYSTEM_DEVELOPMENT	116	-0.442895	-1.63852	0.00123153	0.0389006	1
HP_BIFID_SCROTUM	24	-0.586999	-1.63839	0.017991	0.0389306	1
GO_ION_CHANNEL_BINDING	121	-0.441631	-1.63816	0	0.0390095	1
GO_PROTEIN_LOCALIZATION_TO_CELL_JUNCTION	93	-0.459538	-1.63777	0.00372671	0.0391445	1
HP_ABNORMALITY_OF_THE_HUMERORADIAL_JOINT	32	-0.554436	-1.6377	0.00587371	0.0391455	1
GO_NEGATIVE_REGULATION_OF_PEPTIDASE_ACTIVITY	188	-0.421103	-1.63761	0	0.0391535	1
GO_FIBROBLAST_GROWTH_FACTOR_BINDING	20	-0.599827	-1.6376	0.0218409	0.0391322	1
GO_REGULATION_OF_FAT_CELL_DIFFERENTIATION	122	-0.443009	-1.63759	0.00359712	0.039114	1
GO_CALCIUM_ION_TRANSMEMBRANE_IMPORT_INTO_CYTOSOL	106	-0.454127	-1.63712	0.00375	0.0392727	1
HP_BONE_MARROW_HYPERCELLULARITY	24	-0.59518	-1.63709	0.0119225	0.0392622	1
HP_MENINGOCELE	48	-0.502367	-1.63697	0.00972222	0.039284	1
GO_ORGANELLE_FISSION	427	-0.400391	-1.63682	0	0.0393218	1
GO_POLYMERIC_CYTOSKELETAL_FIBER	578	-0.393646	-1.63652	0	0.0394096	1
HP_PHENOTYPIC_VARIABILITY	381	-0.401705	-1.63633	0	0.0394706	1
GO_RHYTHMIC_BEHAVIOR	36	-0.546719	-1.63618	0.0102639	0.0395068	1
HP_ABNORMAL_VITREOUS_HUMOR_MORPHOLOGY	31	-0.5464	-1.63605	0.00849858	0.03954	1
GO_POSITIVE_REGULATION_OF_LIPID_TRANSPORT	57	-0.493576	-1.63604	0.00540541	0.0395243	1
GO_REGULATION_OF_CD4_POSITIVE_ALPHA_BETA_T_CELL_DIFFERENTIATION	40	-0.524637	-1.63604	0.00706215	0.0395023	1
GO_REGULATION_OF_CELLULAR_RESPONSE_TO_INSULIN_STIMULUS	64	-0.477493	-1.63604	0.00537634	0.0394796	1
GO_NUCLEAR_ENVELOPE_ORGANIZATION	51	-0.501436	-1.63587	0.00828729	0.0395089	1
HP_THIN_SKIN	72	-0.471666	-1.63585	0.00395257	0.0394926	1
HP_PROGRESSIVE_VISUAL_LOSS	87	-0.462463	-1.63555	0	0.0395887	1
GO_BODY_MORPHOGENESIS	45	-0.510517	-1.63542	0.00557103	0.0396083	1
GO_VOCALIZATION_BEHAVIOR	13	-0.673365	-1.63516	0.0211726	0.0396853	1
GO_RESPONSE_TO_PAIN	22	-0.597349	-1.63497	0.0205047	0.0397382	1
GO_POSITIVE_REGULATION_OF_MITOTIC_NUCLEAR_DIVISION	50	-0.509742	-1.6349	0.0122616	0.0397383	1
HP_ADDICTIVE_BEHAVIOR	22	-0.608502	-1.63488	0.0138249	0.0397231	1
HP_APLASIA_HYPOPLASIA_OF_THE_4TH_METACARPAL	12	-0.673765	-1.6347	0.0263158	0.0397741	1
HP_FIBROUS_TISSUE_NEOPLASM	63	-0.473719	-1.63458	0.00547945	0.0397942	1
HP_ECTOPIC_CALCIFICATION	178	-0.419705	-1.63454	0	0.039786	1
HP_OPHTHALMOPARESIS	256	-0.406633	-1.63427	0	0.0398795	1
GO_ENZYME_INHIBITOR_ACTIVITY	299	-0.404657	-1.63422	0	0.0398788	1
GO_BIOACTIVE_LIPID_RECEPTOR_ACTIVITY	13	-0.676766	-1.63407	0.0161812	0.0399208	1
HP_TRIANGULAR_SHAPED_PHALANGES_OF_THE_HAND	136	-0.432535	-1.63385	0	0.0399765	1
HP_SARCOMA	135	-0.437159	-1.63367	0.00121655	0.0400208	1
GO_SPINDLE_MICROTUBULE	63	-0.486589	-1.63334	0.0132802	0.0401228	1
GO_LIPID_EXPORT_FROM_CELL	34	-0.536193	-1.63332	0.00879765	0.0401075	1
GO_POSITIVE_REGULATION_OF_LYMPHOCYTE_DIFFERENTIATION	93	-0.459914	-1.63327	0.00124069	0.0401029	1
GO_INTERLEUKIN_27_MEDIATED_SIGNALING_PATHWAY	10	-0.742939	-1.63314	0.0049505	0.0401233	1
GO_CALCIUM_ION_IMPORT	70	-0.483267	-1.63301	0	0.0401462	1
GO_AMPA_GLUTAMATE_RECEPTOR_COMPLEX	18	-0.62752	-1.63273	0.0199081	0.0402398	1
HP_VERTEBRAL_FUSION	49	-0.51583	-1.63264	0.0114123	0.04026	1
GO_LATERAL_VENTRICLE_DEVELOPMENT	11	-0.712102	-1.63232	0.0231405	0.0403601	1
GO_CELL_PROJECTION_MEMBRANE	298	-0.402089	-1.63202	0	0.0404477	1
GO_ANIMAL_ORGAN_REGENERATION	66	-0.480425	-1.63188	0.00408163	0.0404765	1
HP_ACCELERATED_SKELETAL_MATURATION	58	-0.495201	-1.63182	0.00556328	0.0404785	1
GO_NEGATIVE_REGULATION_OF_ENDOTHELIAL_CELL_APOPTOTIC_PROCESS	24	-0.583806	-1.63169	0.015361	0.0405042	1
GO_MICROTUBULE_CYTOSKELETON_ORGANIZATION_INVOLVED_IN_MITOSIS	141	-0.433031	-1.63154	0.0036452	0.0405381	1
GO_INTERLEUKIN_35_MEDIATED_SIGNALING_PATHWAY	11	-0.693274	-1.63088	0.0202361	0.0407974	1
GO_NEGATIVE_REGULATION_OF_LEUKOCYTE_APOPTOTIC_PROCESS	38	-0.528581	-1.6308	0.0171674	0.0407986	1
GO_CENTRAL_NERVOUS_SYSTEM_NEURON_DIFFERENTIATION	147	-0.426802	-1.63065	0.00117509	0.0408315	1
GO_REGULATION_OF_AMPA_RECEPTOR_ACTIVITY	20	-0.601189	-1.63062	0.0304	0.0408259	1
HP_SCOTOMA	56	-0.492624	-1.63049	0.00673854	0.0408569	1
GO_CYTOKINE_SECRETION	94	-0.453664	-1.63046	0	0.0408457	1
HP_ABNORMALITY_OF_THE_RIB_CAGE	284	-0.405277	-1.6303	0	0.0408754	1
GO_NEGATIVE_REGULATION_OF_NERVOUS_SYSTEM_PROCESS	20	-0.603385	-1.62979	0.0139969	0.0410506	1
GO_REGULATION_OF_CIRCADIAN_SLEEP_WAKE_CYCLE_SLEEP	10	-0.709324	-1.62977	0.0136986	0.0410362	1
GO_CARBOHYDRATE_BINDING	199	-0.417247	-1.62972	0.00112994	0.041028	1
GO_NEGATIVE_REGULATION_OF_CELL_MIGRATION_INVOLVED_IN_SPROUTING_ANGIOGENESIS	19	-0.608376	-1.6296	0.0151057	0.041065	1
GO_PODOSOME	28	-0.572287	-1.62957	0.00603318	0.0410538	1
HP_THICKENED_SKIN	345	-0.404071	-1.62949	0	0.0410585	1
GO_PROTEIN_NITROSYLATION	14	-0.655201	-1.62939	0.0132013	0.0410807	1
GO_PARTURITION	12	-0.679871	-1.62907	0.0182421	0.0411908	1
GO_CARBOHYDRATE_DERIVATIVE_CATABOLIC_PROCESS	170	-0.422627	-1.62897	0	0.0412041	1
HP_SKIN_DIMPLE	70	-0.478685	-1.6286	0.00646831	0.0413327	1
HP_ABNORMALITY_OF_THE_INTERVERTEBRAL_DISK	42	-0.51354	-1.62824	0.00715308	0.0414407	1
HP_ORAL_MUCOSAL_BLISTERS	11	-0.703376	-1.62805	0.0182421	0.0414858	1
GO_POSITIVE_REGULATION_OF_MACROPHAGE_CHEMOTAXIS	17	-0.626139	-1.62797	0.0160514	0.0414953	1
GO_COLLAGEN_CATABOLIC_PROCESS	36	-0.527989	-1.62797	0.0199715	0.041474	1
GO_INVADOPODIUM	15	-0.636951	-1.62762	0.0226904	0.0415983	1
GO_PROTEIN_HOMODIMERIZATION_ACTIVITY	572	-0.389922	-1.62752	0	0.0416119	1
GO_CELL_AGGREGATION	16	-0.640205	-1.62749	0.0176565	0.0416004	1
GO_INTRINSIC_COMPONENT_OF_POSTSYNAPTIC_DENSITY_MEMBRANE	39	-0.530396	-1.62742	0.0126582	0.0415969	1
GO_MODIFICATION_OF_SYNAPTIC_STRUCTURE	23	-0.59127	-1.62738	0.015456	0.041588	1
HP_ABNORMAL_QT_INTERVAL	48	-0.501801	-1.62721	0.0150273	0.0416273	1
HP_SUBCUTANEOUS_NODULE	80	-0.468733	-1.62699	0.002574	0.0417009	1
GO_LYMPHOCYTE_ACTIVATION	552	-0.392437	-1.62662	0	0.0418576	1
GO_REGULATION_OF_MACROPHAGE_DIFFERENTIATION	20	-0.606857	-1.62651	0.0243112	0.0418808	1
GO_KERATINOCYTE_DIFFERENTIATION	129	-0.435383	-1.62642	0	0.0418949	1
GO_RESPONSE_TO_VITAMIN_D	30	-0.556172	-1.62632	0.0085592	0.041923	1
GO_POSITIVE_REGULATION_OF_ORGAN_GROWTH	47	-0.503311	-1.62628	0.00551724	0.0419089	1
GO_NEUROTRANSMITTER_REUPTAKE	22	-0.586746	-1.62627	0.0133531	0.0418875	1
GO_CELLULAR_RESPONSE_TO_MECHANICAL_STIMULUS	74	-0.47498	-1.62609	0.00643501	0.0419345	1
GO_EPITHELIAL_CELL_DIFFERENTIATION	529	-0.390871	-1.62604	0	0.0419344	1
GO_BASE_CONVERSION_OR_SUBSTITUTION_EDITING	16	-0.636938	-1.62593	0.014658	0.0419557	1
HP_BROAD_RIBS	17	-0.625404	-1.62577	0.0245023	0.0420006	1
GO_IN_UTERO_EMBRYONIC_DEVELOPMENT	351	-0.398457	-1.62552	0	0.0420693	1
GO_STEM_CELL_PROLIFERATION	101	-0.448604	-1.62552	0.0025641	0.0420492	1
GO_NEGATIVE_REGULATION_OF_OLIGODENDROCYTE_DIFFERENTIATION	11	-0.705105	-1.62546	0.00853242	0.0420527	1
GO_RESPONSE_TO_FLUID_SHEAR_STRESS	33	-0.533055	-1.62546	0.010043	0.0420307	1
HP_ABNORMAL_MEAN_CORPUSCULAR_HEMOGLOBIN_CONCENTRATION	15	-0.648596	-1.62531	0.0115321	0.0420591	1
HP_HYPERTELORISM	555	-0.390716	-1.62484	0	0.0422336	1
GO_POSITIVE_REGULATION_OF_UBIQUITIN_PROTEIN_LIGASE_ACTIVITY	14	-0.641012	-1.62444	0.0211039	0.0423916	1
HP_ABNORMAL_UTERUS_MORPHOLOGY	115	-0.443323	-1.62425	0.00124844	0.0424488	1
GO_PROSTANOID_BIOSYNTHETIC_PROCESS	23	-0.583691	-1.62423	0.0203762	0.0424291	1
GO_BRANCHING_MORPHOGENESIS_OF_AN_EPITHELIAL_TUBE	138	-0.436781	-1.62413	0.00121507	0.0424385	1
HP_DELAYED_ERUPTION_OF_PRIMARY_TEETH	10	-0.711851	-1.6241	0.0253807	0.0424267	1
HP_JOINT_HYPERFLEXIBILITY	172	-0.425886	-1.62405	0	0.0424137	1
GO_POSITIVE_REGULATION_OF_RESPONSE_TO_EXTERNAL_STIMULUS	415	-0.397264	-1.62397	0	0.0424249	1
GO_POSITIVE_REGULATION_OF_MYELOID_CELL_DIFFERENTIATION	87	-0.458066	-1.62387	0.00384615	0.0424397	1
GO_ION_HOMEOSTASIS	659	-0.386806	-1.62372	0	0.0424798	1
HP_ABNORMAL_ORAL_MUCOSA_MORPHOLOGY	236	-0.415097	-1.62345	0	0.0425506	1
GO_HYDROLASE_ACTIVITY_HYDROLYZING_N_GLYCOSYL_COMPOUNDS	33	-0.538421	-1.62329	0.0058651	0.0426026	1
GO_PODOSOME_ASSEMBLY	16	-0.63204	-1.62321	0.0191388	0.0426059	1
GO_T_CELL_MEDIATED_IMMUNITY	84	-0.460984	-1.62306	0.00521512	0.0426422	1
HP_ABNORMAL_HAND_BONE_OSSIFICATION	30	-0.551168	-1.62284	0.0103245	0.0427133	1
HP_OBSESSIVE_COMPULSIVE_TRAIT	19	-0.611747	-1.6222	0.0246914	0.0429594	1
GO_POSITIVE_REGULATION_OF_CELL_PROJECTION_ORGANIZATION	351	-0.397474	-1.62212	0	0.0429684	1
GO_NEGATIVE_REGULATION_OF_PHOSPHORYLATION	409	-0.392426	-1.62186	0	0.0430525	1
GO_NEGATIVE_REGULATION_OF_ACTIN_FILAMENT_DEPOLYMERIZATION	39	-0.524508	-1.62154	0.0135542	0.0431593	1
GO_RESPONSE_TO_AXON_INJURY	68	-0.480901	-1.62111	0.00397351	0.04332	1
GO_NEGATIVE_REGULATION_OF_PHOSPHOLIPID_METABOLIC_PROCESS	11	-0.704644	-1.62093	0.0182724	0.0433684	1
HP_TRIANGULAR_MOUTH	14	-0.655766	-1.62082	0.0146819	0.0433855	1
GO_SIDE_OF_MEMBRANE	435	-0.394704	-1.62015	0	0.0436614	1
GO_CELLULAR_RESPONSE_TO_CORTICOSTEROID_STIMULUS	52	-0.499335	-1.61996	0.00819672	0.043725	1
GO_REGULATION_OF_LYMPHOCYTE_MIGRATION	48	-0.507813	-1.61992	0.0113154	0.043712	1
GO_POSITIVE_REGULATION_OF_RESPONSE_TO_WOUNDING	61	-0.479518	-1.6198	0.0039267	0.0437415	1
GO_WNT_ACTIVATED_RECEPTOR_ACTIVITY	14	-0.650943	-1.61957	0.0271566	0.0438295	1
GO_NEGATIVE_REGULATION_OF_OSTEOBLAST_DIFFERENTIATION	39	-0.525179	-1.61944	0.00849858	0.0438655	1
HP_WORMIAN_BONES	42	-0.523135	-1.61927	0.00837989	0.0439096	1
GO_DENDRITE_MORPHOGENESIS	135	-0.433848	-1.619	0	0.0440081	1
GO_NEGATIVE_REGULATION_OF_CATALYTIC_ACTIVITY	671	-0.384584	-1.61896	0	0.0439932	1
GO_PROTEIN_HOMOOLIGOMERIZATION	155	-0.426513	-1.61859	0.00118064	0.0441191	1
GO_CYTOKINETIC_PROCESS	39	-0.525719	-1.61806	0.00721501	0.044334	1
GO_SKELETAL_MUSCLE_CELL_DIFFERENTIATION	53	-0.497679	-1.61786	0.00962861	0.0443957	1
HP_HEMIPLEGIA_HEMIPARESIS	187	-0.424502	-1.61763	0.00228833	0.0444591	1
GO_PHOSPHATIDYLSERINE_ACYL_CHAIN_REMODELING	13	-0.670646	-1.61716	0.0180328	0.0446258	1
GO_REPRODUCTIVE_SYSTEM_DEVELOPMENT	380	-0.391371	-1.61677	0	0.0447639	1
GO_REGULATION_OF_SKELETAL_MUSCLE_CELL_DIFFERENTIATION	18	-0.620407	-1.61652	0.0160772	0.0448384	1
HP_APLASIA_HYPOPLASIA_OF_THE_PUBIC_BONE	14	-0.649877	-1.61647	0.0213816	0.0448302	1
GO_MORPHOGENESIS_OF_AN_ENDOTHELIUM	18	-0.607221	-1.61608	0.0214395	0.0449805	1
GO_PHOSPHORIC_DIESTER_HYDROLASE_ACTIVITY	80	-0.460493	-1.61574	0.0065703	0.0450985	1
GO_POSITIVE_REGULATION_OF_NERVOUS_SYSTEM_PROCESS	50	-0.507968	-1.61565	0.0122951	0.0451157	1
GO_LEUKOCYTE_TETHERING_OR_ROLLING	22	-0.593678	-1.61554	0.00780031	0.0451388	1
GO_PHYSIOLOGICAL_CARDIAC_MUSCLE_HYPERTROPHY	27	-0.565589	-1.61551	0.0156006	0.0451258	1
GO_RENAL_SODIUM_EXCRETION	19	-0.594613	-1.61542	0.0293663	0.0451412	1
GO_ANCHORED_COMPONENT_OF_SYNAPTIC_MEMBRANE	10	-0.710065	-1.6154	0.0268908	0.045124	1
HP_SPONDYLOEPIMETAPHYSEAL_DYSPLASIA	15	-0.642504	-1.61515	0.027027	0.0451979	1
GO_INTERLEUKIN_13_PRODUCTION	16	-0.627805	-1.61507	0.0140625	0.0452161	1
GO_REGULATION_OF_PODOSOME_ASSEMBLY	13	-0.659827	-1.61494	0.0241158	0.0452545	1
GO_CALYX_OF_HELD	21	-0.587536	-1.61476	0.0200617	0.0452939	1
HP_ABNORMALITY_OF_SKELETAL_MUSCLE_FIBER_SIZE	56	-0.479692	-1.61452	0.00973574	0.0453721	1
HP_DYSMENORRHEA	12	-0.670346	-1.61439	0.019802	0.0453873	1
GO_REGULATION_OF_HIPPO_SIGNALING	17	-0.624235	-1.61427	0.0202177	0.0454161	1
GO_REGULATION_OF_T_CELL_MEDIATED_IMMUNITY	57	-0.488343	-1.61412	0.00552486	0.0454494	1
GO_REGULATION_OF_PROTEIN_IMPORT	61	-0.483547	-1.61405	0.00524934	0.0454563	1
GO_POSITIVE_REGULATION_OF_PROTEIN_LOCALIZATION_TO_MEMBRANE	118	-0.438116	-1.61389	0.00121655	0.0454985	1
HP_ABNORMALITY_OF_THE_SCAPULA	108	-0.443541	-1.61376	0.00247831	0.0455347	1
GO_POSITIVE_REGULATION_OF_PROTEIN_TYROSINE_KINASE_ACTIVITY	54	-0.490912	-1.61354	0.00276243	0.0456061	1
GO_REGULATION_OF_TRANSFERASE_ACTIVITY	907	-0.382295	-1.61351	0	0.0456088	1
GO_REGULATION_OF_ALPHA_BETA_T_CELL_DIFFERENTIATION	55	-0.497774	-1.61342	0.00408163	0.0456214	1
GO_REGULATION_OF_NERVOUS_SYSTEM_PROCESS	109	-0.441676	-1.61338	0	0.0456158	1
GO_NEGATIVE_REGULATION_OF_PLATELET_ACTIVATION	17	-0.62358	-1.61319	0.0285262	0.0456736	1
GO_REGULATION_OF_NEUROBLAST_PROLIFERATION	25	-0.574226	-1.61317	0.0151515	0.0456557	1
HP_ABNORMALITY_OF_THE_GINGIVA	168	-0.420133	-1.61312	0	0.0456536	1
GO_POSITIVE_REGULATION_OF_SIGNALING_RECEPTOR_ACTIVITY	31	-0.548616	-1.61306	0.0151515	0.0456457	1
HP_VENTRICULAR_FIBRILLATION	42	-0.519361	-1.61262	0.00707214	0.0458203	1
GO_CARDIOBLAST_DIFFERENTIATION	16	-0.639049	-1.6123	0.0213415	0.0459385	1
HP_HYPOREFLEXIA_OF_LOWER_LIMBS	23	-0.576011	-1.61221	0.0184049	0.0459568	1
GO_ICOSANOID_BIOSYNTHETIC_PROCESS	40	-0.509561	-1.61189	0.015299	0.0460683	1
HP_VERTEBRAL_SEGMENTATION_DEFECT	100	-0.445757	-1.61181	0.00123762	0.0460871	1
GO_CENTROMERIC_SISTER_CHROMATID_COHESION	11	-0.692094	-1.61136	0.020202	0.0462464	1
GO_PHOSPHATIDYLINOSITOL_4_5_BISPHOSPHATE_BINDING	70	-0.472601	-1.6111	0.00788436	0.0463285	1
HP_INCREASED_BONE_MINERAL_DENSITY	82	-0.455499	-1.61071	0.00388601	0.0464963	1
GO_MODIFICATION_OF_POSTSYNAPTIC_ACTIN_CYTOSKELETON	12	-0.66857	-1.61068	0.0295082	0.0464868	1
GO_LUNG_ALVEOLUS_DEVELOPMENT	36	-0.518063	-1.61026	0.0131387	0.046631	1
GO_SOMITE_DEVELOPMENT	73	-0.469941	-1.61026	0.00660502	0.0466075	1
GO_NUCLEOSIDE_TRIPHOSPHATE_BIOSYNTHETIC_PROCESS	76	-0.469091	-1.61024	0.00259403	0.0465921	1
GO_CELL_BODY_MEMBRANE	23	-0.582695	-1.60988	0.0151515	0.046725	1
HP_DYSPNEA	352	-0.395007	-1.60965	0	0.0467991	1
GO_REGULATION_OF_CELL_PROJECTION_ORGANIZATION	625	-0.386027	-1.6096	0	0.046797	1
GO_POSITIVE_REGULATION_OF_NEURON_MIGRATION	16	-0.623183	-1.60941	0.0202808	0.0468506	1
HP_ABNORMAL_UVEA_MORPHOLOGY	418	-0.392622	-1.60926	0	0.0468943	1
GO_CARDIAC_MUSCLE_TISSUE_MORPHOGENESIS	53	-0.49687	-1.6092	0.00544959	0.0468957	1
GO_SYNAPTIC_GROWTH_AT_NEUROMUSCULAR_JUNCTION	10	-0.717253	-1.6088	0.0176056	0.047054	1
GO_REGULATION_OF_DNA_BINDING_TRANSCRIPTION_FACTOR_ACTIVITY	382	-0.395291	-1.60875	0	0.0470582	1
GO_T_CELL_MIGRATION	49	-0.494803	-1.60872	0.0108992	0.0470461	1
GO_STEROID_HORMONE_SECRETION	17	-0.626036	-1.60826	0.0218069	0.0472324	1
GO_NEGATIVE_REGULATION_OF_EXTRACELLULAR_MATRIX_ORGANIZATION	11	-0.693819	-1.608	0.0302521	0.047322	1
GO_NEUROMUSCULAR_PROCESS_CONTROLLING_BALANCE	40	-0.511533	-1.60776	0.0142857	0.0474109	1
HP_PATCHY_ALOPECIA	12	-0.672614	-1.60775	0.0323102	0.0473883	1
HP_JOINT_DISLOCATION	302	-0.398086	-1.60755	0	0.0474529	1
GO_NEGATIVE_REGULATION_OF_CYTOSKELETON_ORGANIZATION	145	-0.424578	-1.60754	0.00117509	0.047428	1
GO_TELENCEPHALON_GLIAL_CELL_MIGRATION	18	-0.609378	-1.60746	0.0279938	0.047437	1
GO_PRODUCTION_OF_MOLECULAR_MEDIATOR_OF_IMMUNE_RESPONSE	179	-0.41874	-1.6074	0.00113507	0.0474439	1
GO_CELLULAR_RESPONSE_TO_CALCIUM_ION	71	-0.468193	-1.60735	0.00635324	0.0474467	1
GO_REGULATION_OF_MUSCLE_ADAPTATION	77	-0.466034	-1.60706	0.00526316	0.0475508	1
GO_ELECTRON_TRANSFER_ACTIVITY	104	-0.441785	-1.60699	0	0.0475593	1
HP_GERM_CELL_NEOPLASIA	34	-0.536755	-1.60666	0.0118871	0.0476781	1
HP_BROAD_LONG_BONES	117	-0.434505	-1.60664	0.00242424	0.0476652	1
HP_LACTICACIDURIA	14	-0.651153	-1.60627	0.0096	0.0477989	1
GO_COGNITION	250	-0.40545	-1.60606	0	0.0478727	1
GO_BASOLATERAL_PLASMA_MEMBRANE	203	-0.408404	-1.606	0.00112613	0.0478741	1
GO_LEUKOCYTE_MIGRATION_INVOLVED_IN_INFLAMMATORY_RESPONSE	11	-0.687671	-1.60598	0.0267559	0.047856	1
GO_DENDRITIC_CELL_DIFFERENTIATION	30	-0.547442	-1.60594	0.0177253	0.0478453	1
GO_POSITIVE_REGULATION_OF_CYTOKINE_BIOSYNTHETIC_PROCESS	29	-0.551122	-1.60582	0.0127841	0.0478788	1
GO_NEGATIVE_REGULATION_OF_INTRACELLULAR_SIGNAL_TRANSDUCTION	467	-0.388436	-1.60526	0	0.0481052	1
HP_CEREBRAL_HEMORRHAGE	53	-0.488951	-1.60513	0.0109589	0.048131	1
GO_OXIDOREDUCTASE_ACTIVITY_ACTING_ON_PEROXIDE_AS_ACCEPTOR	40	-0.514013	-1.60478	0.0132353	0.0482598	1
GO_SYNAPTIC_CLEFT	16	-0.61506	-1.60459	0.0279938	0.0483319	1
GO_MYOBLAST_DIFFERENTIATION	73	-0.463727	-1.60447	0.00794702	0.0483599	1
GO_INSULIN_RECEPTOR_BINDING	21	-0.593095	-1.60441	0.0164918	0.0483547	1
HP_CAPILLARY_MALFORMATION	38	-0.524908	-1.60426	0.0115274	0.0483883	1
GO_VASCULAR_ASSOCIATED_SMOOTH_MUSCLE_CELL_MIGRATION	21	-0.594166	-1.60424	0.0154799	0.0483701	1
HP_BROAD_THUMB	64	-0.467921	-1.60408	0.00913838	0.0484191	1
HP_BIMANUAL_SYNKINESIA	25	-0.573326	-1.60394	0.0180451	0.0484697	1
GO_CCR_CHEMOKINE_RECEPTOR_BINDING	17	-0.616368	-1.60375	0.0210697	0.048538	1
GO_MYELOID_CELL_DEVELOPMENT	62	-0.475988	-1.60366	0.0144168	0.048555	1
GO_MODIFIED_AMINO_ACID_BINDING	78	-0.460074	-1.60365	0.00259403	0.0485333	1
GO_PROTEASE_BINDING	119	-0.438132	-1.6036	0.00123305	0.0485297	1
GO_MEIOTIC_CHROMOSOME_SEGREGATION	79	-0.455442	-1.6033	0.00128041	0.0486444	1
GO_APICAL_JUNCTION_COMPLEX	123	-0.429727	-1.60276	0.00367647	0.0488686	1
GO_RESPONSE_TO_REACTIVE_OXYGEN_SPECIES	199	-0.412776	-1.60265	0.00117371	0.0488887	1
GO_POSITIVE_REGULATION_OF_CELL_KILLING	43	-0.511748	-1.60245	0.00851064	0.0489628	1
GO_SPINDLE_ORGANIZATION	179	-0.416543	-1.6023	0	0.0490095	1
GO_NEGATIVE_REGULATION_OF_TYROSINE_PHOSPHORYLATION_OF_STAT_PROTEIN	12	-0.663975	-1.60223	0.0263158	0.049016	1
GO_REGULATION_OF_STRIATED_MUSCLE_CELL_DIFFERENTIATION	89	-0.452616	-1.60206	0.00372208	0.04907	1
GO_POSITIVE_REGULATION_OF_SODIUM_ION_TRANSPORT	32	-0.541341	-1.60201	0.015919	0.049065	1
GO_CELLULAR_ION_HOMEOSTASIS	541	-0.384263	-1.60188	0	0.0491025	1
HP_SYNOSTOSIS_OF_CARPAL_BONES	18	-0.613131	-1.60168	0.0203125	0.0491689	1
GO_DENDRITIC_TREE	533	-0.38686	-1.6016	0	0.0491753	1
HP_MITRAL_STENOSIS	17	-0.618573	-1.60157	0.0175439	0.0491624	1
GO_NEGATIVE_REGULATION_OF_PROTEIN_SERINE_THREONINE_KINASE_ACTIVITY	124	-0.435355	-1.60153	0.0012285	0.0491524	1
GO_REGULATION_OF_NEUROTROPHIN_TRK_RECEPTOR_SIGNALING_PATHWAY	13	-0.668194	-1.60149	0.019544	0.0491463	1
GO_BEHAVIORAL_RESPONSE_TO_COCAINE	10	-0.723392	-1.60145	0.0225694	0.0491346	1
GO_POSITIVE_REGULATION_OF_EXTRINSIC_APOPTOTIC_SIGNALING_PATHWAY	48	-0.499126	-1.60135	0.00558659	0.0491517	1
GO_EXCITATORY_SYNAPSE_ASSEMBLY	21	-0.600523	-1.60062	0.017991	0.0494677	1
GO_FAT_CELL_DIFFERENTIATION	205	-0.411093	-1.60051	0.00111857	0.0494913	1
GO_INTERSTITIAL_MATRIX	12	-0.68984	-1.60044	0.0229508	0.0494963	1
GO_POSITIVE_REGULATION_OF_INTERLEUKIN_13_PRODUCTION	11	-0.700733	-1.60018	0.0187394	0.0495947	1
GO_ENDOTHELIUM_DEVELOPMENT	111	-0.436293	-1.60006	0.00493827	0.0496312	1
GO_MUSCLE_CELL_APOPTOTIC_PROCESS	64	-0.478279	-1.60004	0.0146862	0.0496142	1
GO_T_HELPER_2_CELL_CYTOKINE_PRODUCTION	10	-0.718531	-1.59994	0.0167785	0.0496366	1
GO_MAINTENANCE_OF_LOCATION_IN_CELL	184	-0.413578	-1.59993	0	0.0496124	1
HP_AUTOIMMUNE_HEMOLYTIC_ANEMIA	25	-0.567567	-1.59967	0.0215385	0.0497098	1
HP_CARPAL_SYNOSTOSIS	29	-0.556084	-1.59951	0.0130435	0.0497673	1
GO_REGULATION_OF_MONOCYTE_DIFFERENTIATION	20	-0.596233	-1.59921	0.0185759	0.0498859	1
HP_GENITAL_NEOPLASM	133	-0.43091	-1.59914	0.00232288	0.0498907	1
GO_RESPONSE_TO_ALKALOID	86	-0.452149	-1.59903	0.00639386	0.0499146	1
HP_IRREGULAR_HYPERPIGMENTATION	120	-0.426145	-1.59893	0.00361882	0.0499344	1
HP_GINGIVAL_OVERGROWTH	86	-0.453293	-1.59882	0.0037594	0.0499576	1
GO_GAMMA_AMINOBUTYRIC_ACID_SIGNALING_PATHWAY	18	-0.60788	-1.59872	0.023511	0.0499786	1
GO_VENTRICULAR_SEPTUM_DEVELOPMENT	68	-0.471678	-1.59871	0.00412655	0.0499537	1
HP_MUSCLE_STIFFNESS	72	-0.463072	-1.59868	0.00408163	0.04994	1
GO_POSITIVE_REGULATION_OF_MONOCYTE_CHEMOTAXIS	12	-0.662324	-1.59867	0.0216667	0.0499163	1
GO_REGULATION_OF_CHEMOKINE_MEDIATED_SIGNALING_PATHWAY	10	-0.702724	-1.59863	0.0135135	0.0499077	1
GO_HUMORAL_IMMUNE_RESPONSE	140	-0.428346	-1.59849	0.00240385	0.0499448	1
GO_NEGATIVE_REGULATION_OF_CD4_POSITIVE_ALPHA_BETA_T_CELL_DIFFERENTIATION	18	-0.612575	-1.59843	0.0293663	0.0499445	1
GO_NEGATIVE_REGULATION_OF_MYELOID_LEUKOCYTE_DIFFERENTIATION	41	-0.522261	-1.59821	0.00965517	0.0500126	1
GO_ECTODERMAL_PLACODE_DEVELOPMENT	12	-0.658477	-1.59816	0.0374787	0.0500145	1
GO_MAST_CELL_MIGRATION	12	-0.668299	-1.5979	0.0355412	0.050105	1
GO_PHOSPHATE_ION_TRANSPORT	22	-0.586258	-1.59774	0.0183767	0.0501652	1
GO_EXTRINSIC_COMPONENT_OF_PLASMA_MEMBRANE	152	-0.421414	-1.59766	0.00232558	0.0501682	1
HP_ABNORMALITY_OF_THE_ACHILLES_TENDON	30	-0.538371	-1.59738	0.0173661	0.0502761	1
GO_BLASTODERM_SEGMENTATION	15	-0.634429	-1.59721	0.0366057	0.0503234	1
GO_MONOVALENT_INORGANIC_ANION_HOMEOSTASIS	17	-0.612879	-1.59711	0.0219092	0.0503407	1
GO_REGULATION_OF_MAP_KINASE_ACTIVITY	305	-0.396819	-1.59697	0	0.0503729	1
GO_POSITIVE_REGULATION_OF_BINDING	155	-0.42038	-1.59686	0	0.0503963	1
GO_CELL_DIFFERENTIATION_INVOLVED_IN_METANEPHROS_DEVELOPMENT	23	-0.577987	-1.59653	0.0121581	0.0505209	1
GO_RHO_GUANYL_NUCLEOTIDE_EXCHANGE_FACTOR_ACTIVITY	56	-0.484341	-1.59651	0.00803213	0.0505048	1
GO_EPITHELIAL_CELL_CELL_ADHESION	13	-0.642585	-1.59627	0.016129	0.0505933	1
HP_EPIPHYSEAL_DYSPLASIA	24	-0.575367	-1.59576	0.0179372	0.0508189	1
GO_CEREBRAL_CORTEX_RADIALLY_ORIENTED_CELL_MIGRATION	25	-0.574917	-1.5957	0.0247295	0.0508226	1
GO_NEGATIVE_REGULATION_OF_EPITHELIAL_CELL_PROLIFERATION	117	-0.42997	-1.59559	0.00243013	0.050844	1
GO_REGULATION_OF_NOTCH_SIGNALING_PATHWAY	91	-0.441127	-1.59515	0.00621891	0.0510536	1
GO_NADH_DEHYDROGENASE_ACTIVITY	44	-0.500605	-1.5947	0.0138889	0.0512207	1
GO_POSITIVE_REGULATION_OF_KERATINOCYTE_PROLIFERATION	10	-0.709972	-1.59459	0.0276817	0.0512424	1
GO_NEGATIVE_REGULATION_OF_SKELETAL_MUSCLE_TISSUE_DEVELOPMENT	10	-0.690787	-1.5945	0.0290598	0.0512596	1
GO_POSITIVE_THYMIC_T_CELL_SELECTION	11	-0.680188	-1.59437	0.0248344	0.05129	1
GO_SENSORY_ORGAN_MORPHOGENESIS	219	-0.408605	-1.59433	0	0.0512797	1
HP_UNERUPTED_TOOTH	13	-0.651564	-1.59422	0.0302013	0.0513074	1
GO_NEGATIVE_REGULATION_OF_RHO_PROTEIN_SIGNAL_TRANSDUCTION	21	-0.58284	-1.59373	0.0265487	0.0515051	1
GO_REGULATION_OF_DOPAMINE_SECRETION	26	-0.557562	-1.59303	0.0154083	0.0517906	1
GO_PEPTIDASE_ACTIVITY	468	-0.381879	-1.59294	0	0.0518153	1
GO_RESPONSE_TO_DRUG	333	-0.393855	-1.59291	0.00109529	0.051797	1
GO_RESPONSE_TO_COCAINE	39	-0.506722	-1.59289	0.0194611	0.0517788	1
HP_ABNORMALITY_OF_HUMORAL_IMMUNITY	197	-0.40462	-1.59225	0.00112867	0.0520593	1
GO_CYTOKINESIS	144	-0.419359	-1.59216	0.00236686	0.0520865	1
HP_ABNORMALITY_OF_THE_URETER	254	-0.40195	-1.59212	0	0.0520714	1
GO_RECYCLING_ENDOSOME_MEMBRANE	83	-0.453244	-1.59205	0.00628931	0.052081	1
GO_CYCLASE_ACTIVITY	20	-0.591433	-1.5919	0.0161765	0.0521262	1
HP_SELECTIVE_TOOTH_AGENESIS	27	-0.539669	-1.59175	0.0232198	0.0521774	1
GO_POSITIVE_REGULATION_OF_CELL_ACTIVATION	285	-0.397109	-1.59174	0	0.0521535	1
GO_HORMONE_TRANSPORT	249	-0.398534	-1.59157	0	0.0522172	1
GO_POSTSYNAPTIC_DENSITY_MEMBRANE	74	-0.457273	-1.5915	0.00904393	0.0522316	1
HP_AGENESIS_OF_LATERAL_INCISOR	14	-0.639231	-1.59135	0.023569	0.0522804	1
HP_CHRONIC_LEUKEMIA	19	-0.579444	-1.59098	0.0215385	0.0524296	1
GO_NEGATIVE_REGULATION_OF_LEUKOCYTE_MEDIATED_CYTOTOXICITY	15	-0.630069	-1.59063	0.0189274	0.0525793	1
HP_ABNORMALITY_OF_FRONTAL_SINUS	12	-0.676388	-1.59054	0.0315956	0.0526012	1
GO_RESPONSE_TO_PLATELET_DERIVED_GROWTH_FACTOR	18	-0.61332	-1.5905	0.0273312	0.0525941	1
GO_SENSORY_SYSTEM_DEVELOPMENT	317	-0.391876	-1.59014	0	0.0527461	1
HP_LIMITED_ELBOW_EXTENSION	27	-0.54766	-1.58992	0.0225564	0.0528196	1
GO_FIBROBLAST_APOPTOTIC_PROCESS	20	-0.59001	-1.58985	0.0269865	0.0528227	1
HP_METAPHYSEAL_WIDENING	70	-0.461148	-1.58978	0.0108844	0.0528319	1
GO_PHOSPHATIDYLINOSITOL_BISPHOSPHATE_BINDING	100	-0.439958	-1.58952	0.00123457	0.0529199	1
GO_ENDOCYTOSIS	493	-0.383791	-1.58934	0	0.0529877	1
GO_NEGATIVE_REGULATION_OF_GLUCONEOGENESIS	15	-0.624589	-1.58929	0.030303	0.0529842	1
HP_PAIN	537	-0.381426	-1.58903	0	0.0530872	1
GO_COPPER_ION_BINDING	47	-0.500854	-1.58901	0.00966851	0.0530701	1
GO_ENDOCARDIAL_CUSHION_MORPHOGENESIS	33	-0.533203	-1.5886	0.0269461	0.0532387	1
GO_POSITIVE_REGULATION_OF_TRANSCRIPTION_OF_NOTCH_RECEPTOR_TARGET	18	-0.61485	-1.58845	0.0206677	0.0532922	1
GO_ACETYLGALACTOSAMINYLTRANSFERASE_ACTIVITY	44	-0.498664	-1.58828	0.0111888	0.0533472	1
HP_EMBRYONAL_RENAL_NEOPLASM	41	-0.50528	-1.58807	0.0128023	0.0534183	1
GO_RELAXATION_OF_MUSCLE	24	-0.558343	-1.58759	0.022831	0.0536362	1
GO_POSITIVE_REGULATION_OF_MAP_KINASE_ACTIVITY	239	-0.400388	-1.58732	0	0.0537444	1
GO_NEGATIVE_REGULATION_OF_SYNAPTIC_TRANSMISSION	58	-0.477072	-1.58725	0.0121786	0.0537535	1
GO_REGULATION_OF_VIRAL_LIFE_CYCLE	139	-0.422554	-1.58677	0.00243309	0.0539564	1
GO_POSITIVE_REGULATION_OF_MUSCLE_CELL_DIFFERENTIATION	79	-0.456024	-1.58662	0.00125628	0.0539994	1
GO_POSITIVE_REGULATION_OF_TRANSFERASE_ACTIVITY	617	-0.378955	-1.58624	0	0.054157	1
GO_POSITIVE_REGULATION_OF_GLIOGENESIS	62	-0.472273	-1.58609	0.00634518	0.0541973	1
GO_EMBRYONIC_EYE_MORPHOGENESIS	32	-0.532473	-1.58597	0.0186782	0.054223	1
GO_LEUKOTRIENE_METABOLIC_PROCESS	24	-0.563112	-1.58587	0.0210843	0.0542491	1
HP_ABNORMAL_JAW_MORPHOLOGY	789	-0.376241	-1.58569	0	0.0543088	1
GO_NEGATIVE_REGULATION_OF_KINASE_ACTIVITY	230	-0.4019	-1.5853	0.00112108	0.0544943	1
GO_AXOLEMMA	15	-0.630015	-1.58513	0.0378549	0.054558	1
GO_REGULATION_OF_IMMUNE_EFFECTOR_PROCESS	320	-0.393442	-1.58507	0	0.054557	1
GO_REGULATION_OF_MYELOID_LEUKOCYTE_DIFFERENTIATION	101	-0.435243	-1.58496	0.00382653	0.0545879	1
GO_REGULATION_OF_HOMOTYPIC_CELL_CELL_ADHESION	23	-0.566926	-1.58492	0.0225564	0.0545788	1
HP_MORTALITY_AGING	225	-0.399987	-1.58489	0.00112233	0.0545601	1
GO_POST_EMBRYONIC_ANIMAL_MORPHOGENESIS	11	-0.688551	-1.58478	0.0224138	0.0545929	1
[truncated: 5,607 more rows]

## Sheet: Pos
NAME	SIZE	ES	NES	NOM p-val	FDR q-val	FWER p-val
GO_AMINO_SUGAR_BIOSYNTHETIC_PROCESS	13	0.872125	2.45334	0	0	0
GO_PRERIBOSOME	78	0.573169	2.40288	0	0.000412335	0.001
GO_UDP_N_ACETYLGLUCOSAMINE_METABOLIC_PROCESS	16	0.843856	2.39995	0	0.00027489	0.001
GO_SMALL_SUBUNIT_PROCESSOME	39	0.659589	2.37116	0	0.000407688	0.002
GO_PHOTORECEPTOR_CELL_OUTER_SEGMENT_ORGANIZATION	10	0.87629	2.19719	0	0.00745619	0.045
GO_RNA_METHYLATION	83	0.519895	2.19599	0	0.00661727	0.047
GO_UDP_N_ACETYLGLUCOSAMINE_BIOSYNTHETIC_PROCESS	11	0.86726	2.18353	0	0.00765273	0.061
GO_DETOXIFICATION_OF_INORGANIC_COMPOUND	13	0.807159	2.18134	0	0.00710259	0.065
GO_RRNA_METABOLIC_PROCESS	236	0.445156	2.13758	0	0.0142481	0.148
GO_ERAD_PATHWAY	97	0.47237	2.10832	0	0.0211701	0.234
GO_RIBOSOME_BIOGENESIS	307	0.421035	2.10821	0	0.0193204	0.235
HP_THICK_HAIR	16	0.748555	2.09645	0	0.0210976	0.278
HP_ABNORMAL_GLYCOSYLATION	37	0.578143	2.03528	0	0.0460084	0.532
GO_RNA_METHYLTRANSFERASE_ACTIVITY	69	0.504757	2.03459	0	0.0431279	0.534
GO_ENDOPLASMIC_RETICULUM_TO_CYTOSOL_TRANSPORT	28	0.600645	2.02824	0	0.044155	0.568
GO_INTRA_GOLGI_VESICLE_MEDIATED_TRANSPORT	33	0.594761	2.02801	0	0.041496	0.569
GO_OLIGOSACCHARIDE_LIPID_INTERMEDIATE_BIOSYNTHETIC_PROCESS	21	0.64814	2.02773	0	0.0391489	0.569
GO_UBIQUITIN_DEPENDENT_ERAD_PATHWAY	75	0.481362	2.02087	0	0.0406317	0.603
HP_ELEVATED_CIRCULATING_PARATHYROID_HORMONE_LEVEL	16	0.695463	1.99921	0.00259067	0.0519532	0.71
GO_AROMATIC_AMINO_ACID_TRANSPORT	10	0.803682	1.99918	0	0.0493556	0.71
GO_NCRNA_PROCESSING	381	0.388318	1.99291	0	0.0509432	0.732
GO_NCRNA_METABOLIC_PROCESS	452	0.388854	1.99284	0	0.0487005	0.733
GO_POSITIVE_REGULATION_OF_RNA_POLYMERASE_II_TRANSCRIPTION_PREINITIATION_COMPLEX_ASSEMBLY	11	0.788385	1.9919	0	0.0473212	0.736
GO_RRNA_MODIFICATION	40	0.539291	1.99065	0	0.0461294	0.739
GO_MISFOLDED_PROTEIN_BINDING	26	0.598886	1.98234	0.00597015	0.0493252	0.777
GO_RNA_EXPORT_FROM_NUCLEUS	136	0.440864	1.98231	0	0.0474591	0.777
GO_PROTEIN_QUALITY_CONTROL_FOR_MISFOLDED_OR_INCOMPLETELY_SYNTHESIZED_PROTEINS	29	0.593329	1.9777	0	0.0486457	0.792
GO_MRNA_EXPORT_FROM_NUCLEUS	109	0.459584	1.97326	0	0.0499834	0.812
GO_TRNA_METHYLATION	39	0.541816	1.97317	0	0.0482881	0.812
GO_CATALYTIC_ACTIVITY_ACTING_ON_A_TRNA	102	0.461612	1.97039	0	0.0484416	0.826
GO_P_BODY_ASSEMBLY	21	0.639959	1.96518	0	0.0504382	0.849
GO_PRENYLTRANSFERASE_ACTIVITY	17	0.671798	1.96374	0	0.0495966	0.853
HP_ABNORMAL_PROTEIN_GLYCOSYLATION	31	0.58103	1.96196	0	0.049275	0.863
HP_CILIARY_DYSKINESIA	26	0.588858	1.94727	0	0.0567117	0.892
GO_TRNA_BINDING	56	0.500475	1.94543	0	0.0563449	0.897
GO_REGULATION_OF_MRNA_POLYADENYLATION	17	0.652622	1.94501	0.00571429	0.0550262	0.898
GO_TRNA_MODIFICATION	86	0.457301	1.93907	0	0.0576089	0.926
GO_METHYLTRANSFERASE_COMPLEX	102	0.439447	1.92031	0	0.0705824	0.965
GO_SNORNA_BINDING	32	0.549132	1.91956	0.00316456	0.0694616	0.965
GO_RRNA_METHYLATION	28	0.561471	1.91315	0.0031348	0.073079	0.971
GO_PROTEIN_LOCALIZATION_TO_CHROMOSOME_TELOMERIC_REGION	28	0.578448	1.91144	0	0.0726458	0.973
GO_CELLULAR_RESPONSE_TO_TOPOLOGICALLY_INCORRECT_PROTEIN	161	0.409482	1.90234	0	0.078596	0.979
GO_RNA_MODIFICATION	160	0.409857	1.90107	0	0.0777679	0.981
GO_RIBOSOME_BINDING	54	0.486597	1.89303	0	0.0829565	0.985
GO_CEREBELLAR_PURKINJE_CELL_LAYER_FORMATION	12	0.704327	1.89186	0.00260417	0.0822099	0.986
GO_PROTEIN_EXIT_FROM_ENDOPLASMIC_RETICULUM	47	0.506865	1.89006	0	0.0820985	0.987
GO_CATALYTIC_ACTIVITY_ACTING_ON_RNA	351	0.368175	1.88554	0	0.0841705	0.99
GO_TRNA_METHYLTRANSFERASE_ACTIVITY	34	0.537803	1.88299	0	0.0847311	0.993
GO_REGULATION_OF_CYTOPLASMIC_MRNA_PROCESSING_BODY_ASSEMBLY	10	0.72862	1.88159	0	0.0846282	0.994
GO_NUCLEAR_TRANSCRIBED_MRNA_CATABOLIC_PROCESS_DEADENYLATION_DEPENDENT_DECAY	74	0.457664	1.87888	0	0.0853175	0.996
HP_ABSENT_SHORTENED_DYNEIN_ARMS	10	0.749048	1.87819	0.00702576	0.0842041	0.996
GO_RNA_POLYADENYLATION	47	0.508187	1.87704	0.00383142	0.0836498	0.997
GO_AXONEMAL_DYNEIN_COMPLEX_ASSEMBLY	28	0.553338	1.87644	0.00301205	0.0824996	0.998
GO_GOLGI_ORGANIZATION	140	0.413681	1.87385	0	0.0835244	0.998
HP_ABSENT_OUTER_DYNEIN_ARMS	10	0.749048	1.85816	0.00245098	0.0962317	0.998
GO_NUCLEOTIDE_SUGAR_METABOLIC_PROCESS	37	0.517869	1.8574	0	0.0951783	0.998
GO_HISTONE_METHYLTRANSFERASE_COMPLEX	74	0.455865	1.85668	0	0.0942195	0.998
GO_PROTEIN_N_LINKED_GLYCOSYLATION	71	0.463887	1.85534	0	0.0940601	0.998
HP_DECREASED_LIGHT_AND_DARK_ADAPTED_ELECTRORETINOGRAM_AMPLITUDE	11	0.716597	1.85104	0	0.0967439	0.998
GO_NCRNA_CATABOLIC_PROCESS	36	0.506062	1.84385	0.00340136	0.102806	0.999
HP_ABNORMAL_RESPIRATORY_MOTILE_CILIUM_PHYSIOLOGY	39	0.511625	1.83995	0.00636943	0.105231	0.999
GO_ENDOPLASMIC_RETICULUM_UNFOLDED_PROTEIN_RESPONSE	120	0.413065	1.83438	0	0.109556	0.999
GO_NCRNA_EXPORT_FROM_NUCLEUS	37	0.512772	1.83323	0.0033557	0.109158	0.999
GO_ER_OVERLOAD_RESPONSE	12	0.68825	1.83321	0.00765306	0.107503	0.999
GO_N_ACETYLNEURAMINATE_METABOLIC_PROCESS	11	0.6893	1.83303	0.00810811	0.105999	0.999
GO_PRERIBOSOME_LARGE_SUBUNIT_PRECURSOR	23	0.567495	1.82744	0.00824176	0.110438	0.999
GO_TRNA_METABOLIC_PROCESS	164	0.402866	1.8255	0	0.110995	0.999
HP_LACK_OF_INSIGHT	11	0.690606	1.82132	0	0.113578	0.999
GO_RNA_DECAPPING	14	0.650389	1.81916	0.005291	0.114504	0.999
GO_NEGATIVE_REGULATION_OF_FATTY_ACID_METABOLIC_PROCESS	26	0.558208	1.81884	0.003003	0.113299	0.999
GO_AMINO_ACID_ACTIVATION	30	0.543377	1.81622	0.00297619	0.115008	1
GO_MRNA_TRANSPORT	146	0.395552	1.81363	0	0.116285	1
GO_TRNA_TRANSPORT	36	0.49532	1.80966	0.00316456	0.119029	1
GO_PRECATALYTIC_SPLICEOSOME	53	0.469357	1.80606	0	0.121674	1
GO_COPII_COATED_VESICLE_CARGO_LOADING	15	0.645784	1.8017	0.0106383	0.125452	1
GO_U2_TYPE_SPLICEOSOMAL_COMPLEX	93	0.416787	1.79972	0	0.126235	1
HP_PERSEVERATION	17	0.625053	1.79953	0.00808625	0.124828	1
GO_GENERAL_TRANSCRIPTION_INITIATION_FACTOR_ACTIVITY	43	0.499981	1.79768	0.003663	0.125217	1
GO_RRNA_BASE_METHYLATION	11	0.709571	1.78986	0	0.132919	1
HP_ABNORMAL_UPPER_MOTOR_NEURON_MORPHOLOGY	20	0.571974	1.78583	0.00600601	0.136157	1
HP_ABNORMALITY_OF_THE_COSTOCHONDRAL_JUNCTION	13	0.660565	1.78547	0.00278552	0.134957	1
GO_CCR4_NOT_COMPLEX	16	0.618363	1.77883	0.00539084	0.141694	1
GO_ORGANOPHOSPHATE_ESTER_TRANSMEMBRANE_TRANSPORTER_ACTIVITY	33	0.512594	1.77717	0.00645161	0.142216	1
GO_RIBONUCLEOPROTEIN_COMPLEX_BINDING	129	0.392633	1.77714	0	0.140581	1
GO_REGULATION_OF_FATTY_ACID_OXIDATION	29	0.526533	1.77567	0.00879765	0.141084	1
GO_DEADENYLATION_DEPENDENT_DECAPPING_OF_NUCLEAR_TRANSCRIBED_MRNA	10	0.716246	1.77531	0.00956938	0.139963	1
GO_ZINC_ION_HOMEOSTASIS	34	0.501677	1.77203	0.00321543	0.142533	1
GO_MYOSIN_V_BINDING	16	0.618326	1.77156	0.01	0.141482	1
HP_MOTOR_AXONAL_NEUROPATHY	22	0.562912	1.77068	0.00273973	0.140897	1
HP_DYSCHROMATOPSIA	20	0.582572	1.76676	0.0142045	0.14419	1
GO_MRNA_METHYLATION	16	0.591075	1.7665	0.0107817	0.143086	1
GO_REGULATION_OF_TRANSCRIPTION_BY_RNA_POLYMERASE_III	22	0.558877	1.76602	0.010989	0.142156	1
GO_AZOLE_TRANSMEMBRANE_TRANSPORT	10	0.723014	1.76589	0.00243902	0.140837	1
GO_POLY_A_SPECIFIC_RIBONUCLEASE_ACTIVITY	14	0.647838	1.76133	0.00777202	0.145221	1
GO_ARF_GUANYL_NUCLEOTIDE_EXCHANGE_FACTOR_ACTIVITY	18	0.590508	1.7541	0.015748	0.15324	1
GO_IRON_ION_TRANSPORT	71	0.432137	1.75403	0	0.151729	1
GO_NEGATIVE_REGULATION_OF_FATTY_ACID_OXIDATION	11	0.685781	1.75048	0.0128866	0.155361	1
HP_ABNORMAL_RESPIRATORY_MOTILE_CILIUM_MORPHOLOGY	16	0.605264	1.74985	0.00516796	0.154618	1
GO_MISMATCH_REPAIR_COMPLEX_BINDING	10	0.69693	1.74806	0.00726392	0.155483	1
GO_RIBONUCLEOPROTEIN_COMPLEX_BIOGENESIS	450	0.342958	1.74756	0	0.154616	1
HP_PROGRESSIVE_MICROCEPHALY	67	0.437331	1.74689	0	0.153987	1
GO_CATALYTIC_STEP_1_SPLICEOSOME	12	0.66535	1.74573	0.0199005	0.154163	1
GO_STRESS_GRANULE_ASSEMBLY	23	0.549413	1.74499	0.00283286	0.153581	1
GO_ESTABLISHMENT_OF_PROTEIN_LOCALIZATION_TO_TELOMERE	17	0.585111	1.74479	0.0148368	0.152339	1
HP_RESPIRATORY_INSUFFICIENCY_DUE_TO_DEFECTIVE_CILIARY_CLEARANCE	10	0.695096	1.74219	0.0119332	0.154329	1
GO_CALCIUM_INDEPENDENT_CELL_CELL_ADHESION_VIA_PLASMA_MEMBRANE_CELL_ADHESION_MOLECULES	14	0.615691	1.7395	0.0108696	0.156559	1
GO_CATALYTIC_STEP_2_SPLICEOSOME	87	0.415581	1.73802	0	0.157061	1
GO_AMINO_SUGAR_METABOLIC_PROCESS	38	0.479717	1.73584	0	0.158591	1
GO_RNA_LOCALIZATION	224	0.358886	1.73584	0	0.157151	1
GO_RETICULOPHAGY	11	0.680806	1.73544	0.0154639	0.156173	1
HP_APLASIA_HYPOPLASIA_OF_THE_SPLEEN	67	0.43613	1.734	0	0.156777	1
GO_KETONE_BODY_METABOLIC_PROCESS	10	0.686209	1.73304	0.0179028	0.156618	1
GO_MODIFIED_AMINO_ACID_TRANSPORT	23	0.558832	1.7327	0.00842697	0.155743	1
HP_ABNORMAL_CALCIUM_PHOSPHATE_REGULATING_HORMONE_LEVEL	35	0.49064	1.72894	0.0100334	0.159376	1
GO_OUTER_DYNEIN_ARM_ASSEMBLY	16	0.611118	1.72502	0.0132626	0.163215	1
HP_PULMONARY_INTERSTITIAL_HIGH_RESOLUTION_COMPUTED_TOMOGRAPHY_ABNORMALITY	12	0.646355	1.72494	0.0210526	0.161912	1
GO_ESTABLISHMENT_OF_ENDOTHELIAL_INTESTINAL_BARRIER	10	0.682948	1.72217	0.0220588	0.164202	1
GO_NUCLEOTIDE_SUGAR_BIOSYNTHETIC_PROCESS	22	0.557237	1.72036	0.00864553	0.165254	1
GO_REGULATION_OF_RESPONSE_TO_FOOD	11	0.665337	1.7164	0.02657	0.169231	1
HP_FRONTOTEMPORAL_DEMENTIA	26	0.521007	1.71193	0.0149701	0.174076	1
GO_RESPONSE_TO_TOPOLOGICALLY_INCORRECT_PROTEIN	199	0.355313	1.71082	0	0.174213	1
GO_NUCLEAR_CYCLIN_DEPENDENT_PROTEIN_KINASE_HOLOENZYME_COMPLEX	12	0.662457	1.70772	0.0197531	0.177382	1
GO_PROTEIN_IMPORT_INTO_MITOCHONDRIAL_MATRIX	19	0.551418	1.70672	0.0143678	0.177498	1
GO_REGULATION_OF_PROTEIN_FOLDING	12	0.648002	1.70402	0.0277078	0.179922	1
GO_RESPONSE_TO_ENDOPLASMIC_RETICULUM_STRESS	278	0.339184	1.70255	0	0.180545	1
GO_CILIARY_PLASM	103	0.385215	1.7003	0	0.182526	1
HP_ABNORMAL_SPERM_MOTILITY	52	0.430677	1.70023	0	0.181152	1
HP_GENERALIZED_AMINOACIDURIA	10	0.676995	1.69691	0.0187354	0.18464	1
HP_ABNORMAL_CIRCULATING_FATTY_ACID_ANION_CONCENTRATION	16	0.591445	1.69432	0.028169	0.187067	1
GO_TRNA_GUANINE_METHYLTRANSFERASE_ACTIVITY	13	0.635318	1.69207	0.0160428	0.189035	1
GO_REGULATION_OF_PROTEIN_EXIT_FROM_ENDOPLASMIC_RETICULUM	27	0.521774	1.69153	0.0123457	0.188334	1
GO_COPII_VESICLE_COAT	15	0.599146	1.69095	0.026393	0.187791	1
GO_RESPONSE_TO_UV_B	16	0.585991	1.68885	0.0132626	0.189569	1
GO_IRON_COORDINATION_ENTITY_TRANSPORT	13	0.626592	1.68854	0.0135135	0.188658	1
GO_GOLGI_VESICLE_BUDDING	79	0.405181	1.68763	0	0.1886	1
GO_CATALYTIC_ACTIVITY_ACTING_ON_A_RRNA	24	0.527188	1.68739	0.0160256	0.187535	1
GO_TRANSFERRIN_TRANSPORT	35	0.485583	1.68728	0.0139373	0.186345	1
GO_VESICLE_CARGO_LOADING	21	0.5471	1.6858	0.0147929	0.187296	1
GO_CELLULAR_RESPONSE_TO_ZINC_ION	20	0.537039	1.68449	0.0248619	0.187742	1
HP_SENILE_PLAQUES	12	0.622892	1.68364	0.0238095	0.187576	1
HP_COUGH	104	0.386267	1.68266	0	0.187645	1
HP_PULMONARY_OBSTRUCTION	70	0.411707	1.68087	0	0.189063	1
GO_RESPONSE_TO_MANGANESE_ION	18	0.565718	1.6802	0.0176471	0.188803	1
GO_MELANOSOME_MEMBRANE	11	0.637331	1.67922	0.0153453	0.188929	1
GO_TRNA_PROCESSING	124	0.383462	1.6788	0.00574713	0.188308	1
GO_DENSE_CORE_GRANULE	21	0.536584	1.67864	0.0207715	0.187242	1
GO_AMINO_SUGAR_CATABOLIC_PROCESS	11	0.639265	1.67847	0.0272277	0.186194	1
GO_REGULATION_OF_CLATHRIN_DEPENDENT_ENDOCYTOSIS	16	0.568574	1.67807	0.0157895	0.185535	1
GO_REGULATION_OF_CHOLESTEROL_METABOLIC_PROCESS	55	0.434455	1.67727	0	0.185415	1
HP_POSTNATAL_MICROCEPHALY	126	0.364069	1.6744	0	0.188438	1
GO_MICROTUBULE_NUCLEATION	29	0.497942	1.67388	0.00664452	0.188062	1
HP_CRACKLES	12	0.628767	1.67312	0.0217391	0.187977	1
GO_LAMELLAR_BODY	11	0.652365	1.67288	0.0238727	0.187062	1
GO_ESTABLISHMENT_OF_RNA_LOCALIZATION	191	0.35254	1.66936	0.008	0.190906	1
HP_TACHYPNEA	98	0.384144	1.66929	0	0.189769	1
GO_GRANULOCYTE_DIFFERENTIATION	26	0.511831	1.66889	0.00598802	0.189109	1
GO_POSITIVE_REGULATION_OF_CELL_MATURATION	10	0.674155	1.66886	0.0243902	0.187976	1
GO_MRNA_METHYLTRANSFERASE_ACTIVITY	12	0.634895	1.66877	0.0213777	0.186967	1
GO_REGULATION_OF_AUTOPHAGOSOME_MATURATION	13	0.609453	1.66755	0.015544	0.187485	1
GO_ZYMOGEN_GRANULE	12	0.62329	1.66627	0.0397022	0.187926	1
GO_REGULATION_OF_RESPONSE_TO_EXTRACELLULAR_STIMULUS	17	0.565324	1.66578	0.0138504	0.187461	1
GO_EUKARYOTIC_48S_PREINITIATION_COMPLEX	15	0.585309	1.66502	0.0207254	0.187372	1
HP_ABNORMAL_MACROPHAGE_MORPHOLOGY	30	0.491056	1.66401	0.0215385	0.187467	1
GO_PROTEIN_PHOSPHATASE_1_BINDING	25	0.517585	1.66336	0.0165016	0.187289	1
GO_CARBOHYDRATE_DERIVATIVE_TRANSMEMBRANE_TRANSPORTER_ACTIVITY	52	0.436879	1.66175	0.00722022	0.188588	1
HP_EEG_WITH_GENERALIZED_SLOW_ACTIVITY	12	0.635123	1.66087	0.0336788	0.188875	1
GO_POSITIVE_REGULATION_OF_TRANSCRIPTION_BY_RNA_POLYMERASE_III	11	0.652501	1.65785	0.0078329	0.191935	1
GO_ENDOPLASMIC_RETICULUM_TO_GOLGI_VESICLE_MEDIATED_TRANSPORT	190	0.344156	1.65532	0	0.194477	1
GO_1_PHOSPHATIDYLINOSITOL_BINDING	13	0.608627	1.65451	0.0280612	0.194562	1
GO_SMALL_NUCLEOLAR_RIBONUCLEOPROTEIN_COMPLEX	25	0.521142	1.65375	0.028125	0.194674	1
GO_TRANSCRIPTIONALLY_ACTIVE_CHROMATIN	20	0.533816	1.6494	0.0138889	0.199887	1
GO_COPII_COATED_VESICLE_BUDDING	71	0.396345	1.64772	0.00793651	0.201124	1
GO_REGULATION_OF_FATTY_ACID_BETA_OXIDATION	19	0.538205	1.64772	0.0186667	0.199962	1
GO_SPERM_MIDPIECE	20	0.543188	1.6472	0.0252101	0.199605	1
GO_ER_NUCLEUS_SIGNALING_PATHWAY	51	0.425527	1.64647	0	0.199544	1
HP_MEDIASTINAL_LYMPHADENOPATHY	16	0.572981	1.64575	0.0131926	0.199572	1
GO_AXONEME_ASSEMBLY	58	0.419935	1.64492	0.003663	0.199622	1
GO_RRNA_CATABOLIC_PROCESS	20	0.545	1.64455	0.017094	0.19902	1
GO_INTRINSIC_APOPTOTIC_SIGNALING_PATHWAY_IN_RESPONSE_TO_ENDOPLASMIC_RETICULUM_STRESS	59	0.421269	1.64367	0.008	0.199335	1
GO_POSITIVE_REGULATION_OF_RIBOSOME_BIOGENESIS	10	0.645984	1.64296	0.0333333	0.199386	1
GO_ATP_DEPENDENT_MICROTUBULE_MOTOR_ACTIVITY_MINUS_END_DIRECTED	16	0.556237	1.64254	0.0287206	0.198867	1
GO_RNA_PHOSPHODIESTER_BOND_HYDROLYSIS_EXONUCLEOLYTIC	44	0.426483	1.6389	0.00632911	0.203233	1
GO_VESICLE_TARGETING_TO_FROM_OR_WITHIN_GOLGI	72	0.397118	1.63716	0	0.20474	1
GO_POSTTRANSLATIONAL_PROTEIN_TARGETING_TO_ENDOPLASMIC_RETICULUM_MEMBRANE	11	0.615443	1.63672	0.0257732	0.204358	1
GO_PHOTORECEPTOR_CELL_DEVELOPMENT	38	0.452477	1.63183	0.00955414	0.21057	1
GO_SELECTIVE_AUTOPHAGY	60	0.417915	1.6315	0	0.209961	1
HP_HYPOMETRIC_SACCADES	14	0.602626	1.62827	0.042328	0.213744	1
GO_EXONUCLEASE_ACTIVITY_ACTIVE_WITH_EITHER_RIBO_OR_DEOXYRIBONUCLEIC_ACIDS_AND_PRODUCING_5_PHOSPHOMONOESTERS	56	0.409192	1.62699	0.00392157	0.214587	1
GO_POSITIVE_REGULATION_OF_TRANSCRIPTION_FROM_RNA_POLYMERASE_II_PROMOTER_IN_RESPONSE_TO_ENDOPLASMIC_RETICULUM_STRESS	10	0.629374	1.62634	0.0216346	0.214453	1
HP_ABNORMALITY_OF_THE_INTRINSIC_PATHWAY	25	0.49513	1.62404	0.0142857	0.216789	1
GO_NEGATIVE_REGULATION_OF_GLYCOLYTIC_PROCESS	13	0.609178	1.62391	0.0253807	0.215858	1
GO_EXCITATORY_EXTRACELLULAR_LIGAND_GATED_ION_CHANNEL_ACTIVITY	21	0.535501	1.62381	0.0185759	0.214877	1
GO_90S_PRERIBOSOME	29	0.475247	1.62369	0.00595238	0.21397	1
GO_INO80_TYPE_COMPLEX	25	0.490315	1.62141	0.00895522	0.216404	1
GO_DEATH_DOMAIN_BINDING	10	0.660865	1.62078	0.0464548	0.216235	1
HP_MULTIPLE_PULMONARY_CYSTS	11	0.629899	1.61874	0.019802	0.21826	1
GO_PROTEIN_TRANSMEMBRANE_IMPORT_INTO_INTRACELLULAR_ORGANELLE	35	0.463832	1.6186	0.00980392	0.217313	1
GO_REGULATION_OF_CILIUM_ASSEMBLY	49	0.430309	1.61838	0.00687285	0.21655	1
GO_N_ACETYLGLUCOSAMINE_METABOLIC_PROCESS	18	0.547183	1.61616	0.0350404	0.218959	1
GO_RESPONSE_TO_MISFOLDED_PROTEIN	25	0.498378	1.61482	0.0228571	0.219975	1
GO_OUTER_MITOCHONDRIAL_MEMBRANE_PROTEIN_COMPLEX	21	0.517332	1.61223	0.0373563	0.222749	1
GO_NUCLEOBASE_CONTAINING_COMPOUND_TRANSPORT	240	0.32829	1.61195	0	0.222085	1
GO_TRIGLYCERIDE_BIOSYNTHETIC_PROCESS	35	0.459029	1.60938	0.0186916	0.2249	1
HP_DYSPLASTIC_CORPUS_CALLOSUM	18	0.54659	1.60896	0.0155039	0.224505	1
HP_DISTAL_UPPER_LIMB_MUSCLE_WEAKNESS	12	0.608536	1.60758	0.0265252	0.225595	1
GO_PEPTIDYL_HISTIDINE_MODIFICATION	11	0.617749	1.60738	0.0397878	0.224788	1
HP_ABNORMALITY_OF_THE_2ND_TOE	38	0.451821	1.60654	0.0125786	0.225082	1
HP_PHARYNGITIS	10	0.633306	1.60607	0.0359897	0.224706	1
GO_NEGATIVE_REGULATION_OF_PEPTIDYL_LYSINE_ACETYLATION	17	0.555063	1.60512	0.0306407	0.225016	1
GO_CYSTEINE_METABOLIC_PROCESS	12	0.612261	1.60492	0.0358974	0.224289	1
HP_LOWER_LIMB_HYPERTONIA	15	0.565537	1.6048	0.0280112	0.223433	1
GO_TETRAPYRROLE_BIOSYNTHETIC_PROCESS	25	0.484913	1.60447	0.0147493	0.222882	1
GO_POSITIVE_REGULATION_OF_TRIGLYCERIDE_METABOLIC_PROCESS	21	0.526827	1.60432	0.0286533	0.222018	1
GO_MRNA_3_END_PROCESSING	100	0.370185	1.60321	0	0.222812	1
GO_PROTEIN_LOCALIZATION_TO_CILIARY_MEMBRANE	11	0.628149	1.60304	0.0447761	0.221976	1
HP_ABNORMAL_ASTROCYTE_MORPHOLOGY	36	0.461593	1.60124	0.020202	0.223714	1
HP_AGNOSIA	29	0.466197	1.59934	0.0253165	0.225627	1
HP_CELLULAR_IMMUNODEFICIENCY	30	0.468932	1.59903	0.0152905	0.225028	1
GO_REGULATION_OF_RESPONSE_TO_ENDOPLASMIC_RETICULUM_STRESS	87	0.385454	1.59605	0.00934579	0.22862	1
HP_EPISODIC_HYPERHIDROSIS	22	0.50126	1.59581	0.034384	0.227994	1
HP_PSYCHOMOTOR_DETERIORATION	12	0.617004	1.59538	0.0403226	0.22762	1
GO_MRNA_CLEAVAGE_INVOLVED_IN_MRNA_PROCESSING	14	0.588088	1.59435	0.0381679	0.228263	1
HP_POLYURIA	20	0.516686	1.59409	0.0426136	0.22764	1
GO_RESPONSE_TO_STARVATION	183	0.333309	1.59402	0	0.226733	1
GO_IRE1_MEDIATED_UNFOLDED_PROTEIN_RESPONSE	65	0.399891	1.59371	0.0121951	0.226251	1
HP_RHINITIS	60	0.415616	1.59319	0.00414938	0.226017	1
GO_REGULATION_OF_RNA_EXPORT_FROM_NUCLEUS	16	0.55077	1.59273	0.0199005	0.225811	1
HP_LOSS_OF_SPEECH	36	0.456077	1.59159	0.0143885	0.226641	1
GO_CELLULAR_RESPONSE_TO_STARVATION	148	0.346302	1.59094	0	0.226732	1
GO_FOLIC_ACID_BINDING	10	0.640185	1.59037	0.0427136	0.226611	1
GO_SULFUR_AMINO_ACID_BIOSYNTHETIC_PROCESS	16	0.555877	1.58937	0.0430108	0.227217	1
HP_RESTRICTIVE_VENTILATORY_DEFECT	56	0.401666	1.58921	0.00381679	0.226486	1
GO_EPITHELIAL_CILIUM_MOVEMENT_INVOLVED_IN_DETERMINATION_OF_LEFT_RIGHT_ASYMMETRY	10	0.629441	1.58885	0.0351759	0.226109	1
GO_LIGASE_ACTIVITY_FORMING_CARBON_OXYGEN_BONDS	22	0.516258	1.58844	0.0266667	0.225854	1
GO_NUCLEAR_PORE_OUTER_RING	10	0.635526	1.5866	0.0390625	0.227555	1
GO_NEUROPEPTIDE_HORMONE_ACTIVITY	10	0.644551	1.58485	0.0389294	0.229378	1
HP_ABNORMAL_LOWER_MOTOR_NEURON_MORPHOLOGY	23	0.502549	1.58415	0.0208333	0.229424	1
GO_REGULATION_OF_CILIUM_BEAT_FREQUENCY	11	0.617807	1.58329	0.0476191	0.229743	1
GO_ENDOPLASMIC_RETICULUM_EXIT_SITE	26	0.479113	1.58328	0.0251572	0.228799	1
GO_RNA_PHOSPHODIESTER_BOND_HYDROLYSIS	145	0.344427	1.58152	0	0.230651	1
GO_CELLULAR_RESPONSE_TO_MANGANESE_ION	12	0.600195	1.58109	0.0332481	0.230392	1
GO_ER_ASSOCIATED_MISFOLDED_PROTEIN_CATABOLIC_PROCESS	12	0.598877	1.57918	0.0417755	0.232411	1
GO_CELLULAR_RESPONSE_TO_COPPER_ION	21	0.499586	1.57835	0.0244565	0.232682	1
GO_VESICLE_TARGETING	91	0.373432	1.57705	0	0.233711	1
GO_STEROL_BIOSYNTHETIC_PROCESS	71	0.383134	1.57497	0	0.235947	1
GO_TRANSLATION_FACTOR_ACTIVITY_RNA_BINDING	82	0.383664	1.57447	0.004329	0.23575	1
GO_ANCHORED_COMPONENT_OF_SYNAPTIC_VESICLE_MEMBRANE	11	0.609529	1.57336	0.0362694	0.236564	1
GO_ESTABLISHMENT_OF_ENDOTHELIAL_BARRIER	41	0.418625	1.57246	0.0294118	0.237037	1
GO_GLUCOSAMINE_CONTAINING_COMPOUND_METABOLIC_PROCESS	23	0.502064	1.57172	0.0332326	0.237359	1
GO_UBIQUITIN_SPECIFIC_PROTEASE_BINDING	18	0.544024	1.57111	0.0325203	0.237377	1
GO_RESPONSE_TO_FOOD	23	0.494734	1.5709	0.0277008	0.236693	1
HP_SPERM_TAIL_ANOMALY	10	0.626216	1.57066	0.037123	0.236114	1
GO_COPPER_ION_HOMEOSTASIS	17	0.535237	1.56878	0.0410256	0.238237	1
GO_CEREBELLAR_CORTEX_FORMATION	21	0.511257	1.56854	0.0343915	0.237635	1
GO_EUKARYOTIC_TRANSLATION_INITIATION_FACTOR_3_COMPLEX	17	0.52803	1.56823	0.0454545	0.237231	1
HP_ABNORMAL_ANATOMIC_LOCATION_OF_THE_HEART	105	0.360873	1.56818	0.00543478	0.236397	1
GO_NUCLEAR_TRANSCRIBED_MRNA_POLY_A_TAIL_SHORTENING	33	0.444852	1.56707	0.0136519	0.237299	1
HP_IRREGULAR_VERTEBRAL_ENDPLATES	27	0.473432	1.56607	0.022082	0.237874	1
GO_PERICENTRIOLAR_MATERIAL	21	0.512835	1.56452	0.0254958	0.239356	1
GO_NEGATIVE_REGULATION_OF_RESPONSE_TO_ENDOPLASMIC_RETICULUM_STRESS	49	0.415347	1.56412	0.0148148	0.239051	1
GO_NUCLEAR_CHROMOSOME_TELOMERIC_REGION	98	0.358197	1.56294	0	0.240036	1
GO_REGULATION_OF_PROTEIN_K63_LINKED_UBIQUITINATION	12	0.590014	1.56166	0.0577428	0.241162	1
GO_CELLULAR_TRANSITION_METAL_ION_HOMEOSTASIS	104	0.363328	1.5616	0.00549451	0.240356	1
GO_PSEUDOURIDINE_SYNTHESIS	18	0.523124	1.56158	0.0360111	0.239476	1
GO_ALANINE_TRANSMEMBRANE_TRANSPORTER_ACTIVITY	11	0.604936	1.56145	0.035	0.238734	1
GO_MICROTUBULE_NUCLEATION_BY_MICROTUBULE_ORGANIZING_CENTER	10	0.636127	1.5611	0.0469974	0.238399	1
GO_U2_TYPE_CATALYTIC_STEP_2_SPLICEOSOME	30	0.456489	1.55968	0.0223642	0.239789	1
HP_UPPER_LIMB_SPASTICITY	14	0.561567	1.55511	0.0360825	0.246072	1
HP_FRONTOTEMPORAL_CEREBRAL_ATROPHY	13	0.589606	1.55493	0.0337662	0.245474	1
GO_REGULATION_OF_APPETITE	11	0.602915	1.5544	0.0376884	0.245405	1
GO_NUCLEOID	41	0.4322	1.54928	0.027027	0.253048	1
GO_CELLULAR_COPPER_ION_HOMEOSTASIS	14	0.568432	1.54926	0.0220386	0.252151	1
HP_PROGRESSIVE_SPASTICITY	20	0.51334	1.54917	0.02849	0.251396	1
GO_CELLULAR_RESPONSE_TO_ACIDIC_PH	11	0.598723	1.54907	0.0522388	0.250642	1
GO_MACROAUTOPHAGY	300	0.311034	1.54902	0	0.249792	1
HP_NEPHRONOPHTHISIS	37	0.448826	1.54808	0.0125786	0.250471	1
GO_MOTILE_CILIUM_ASSEMBLY	18	0.513064	1.54662	0.0348525	0.251941	1
GO_MATURATION_OF_LSU_RRNA	28	0.455864	1.54528	0.0155763	0.253261	1
GO_REGULATION_OF_CHOLESTEROL_BIOSYNTHETIC_PROCESS	44	0.411962	1.5424	0.00980392	0.25697	1
GO_REGULATION_OF_TRANSLATIONAL_ELONGATION	18	0.522785	1.54199	0.0423729	0.256681	1
GO_SYNAPTIC_VESICLE_DOCKING	11	0.575882	1.54157	0.0608272	0.256455	1
GO_HISTONE_H4_K20_METHYLATION	10	0.6145	1.541	0.0466321	0.256476	1
GO_SECONDARY_METABOLIC_PROCESS	45	0.416988	1.54091	0.00655738	0.255736	1
GO_TRANSLATION_PREINITIATION_COMPLEX	18	0.534104	1.53984	0.0533333	0.256489	1
GO_GOLGI_TRANSPORT_COMPLEX	13	0.563804	1.53983	0.0456989	0.255604	1
GO_NEGATIVE_REGULATION_OF_AUTOPHAGY	79	0.376691	1.53824	0.00865801	0.257339	1
GO_3_5_EXONUCLEASE_ACTIVITY	55	0.400362	1.53786	0.0176678	0.25705	1
HP_PROGRESSIVE_CEREBELLAR_ATAXIA	81	0.365059	1.53686	0.00434783	0.257771	1
GO_MAINTENANCE_OF_PROTEIN_LOCALIZATION_IN_ENDOPLASMIC_RETICULUM	14	0.569852	1.53552	0.0621622	0.259066	1
GO_VITAMIN_BINDING	113	0.338122	1.53421	0	0.260426	1
GO_REGULATION_OF_RNA_POLYMERASE_II_TRANSCRIPTION_PREINITIATION_COMPLEX_ASSEMBLY	14	0.562438	1.53355	0.0479798	0.260654	1
GO_OXIDOREDUCTASE_ACTIVITY_ACTING_ON_THE_CH_NH_GROUP_OF_DONORS	26	0.47165	1.53334	0.0395137	0.260066	1
HP_BREATHING_DYSREGULATION	10	0.606178	1.53317	0.0385604	0.259453	1
GO_ATPASE_ACTIVITY_COUPLED_TO_TRANSMEMBRANE_MOVEMENT_OF_IONS_ROTATIONAL_MECHANISM	20	0.506682	1.53313	0.0434783	0.258647	1
GO_INTRAMOLECULAR_TRANSFERASE_ACTIVITY	25	0.467495	1.53306	0.0240964	0.257861	1
GO_NUCLEAR_PORE_ORGANIZATION	14	0.560171	1.53302	0.0394737	0.257078	1
GO_RNA_3_END_PROCESSING	140	0.332374	1.53248	0	0.257106	1
HP_OCULOMOTOR_APRAXIA	83	0.365087	1.53245	0.00444444	0.256292	1
GO_CELL_JUNCTION_MAINTENANCE	28	0.469166	1.53207	0.038806	0.256129	1
HP_DYSLEXIA	21	0.489953	1.53053	0.0557103	0.257847	1
HP_ASTROCYTOSIS	20	0.501069	1.5298	0.0509915	0.25816	1
GO_REGULATION_OF_TRANSCRIPTION_OF_NUCLEOLAR_LARGE_RRNA_BY_RNA_POLYMERASE_I	11	0.594	1.52728	0.0391645	0.261157	1
GO_RIBOSOMAL_LARGE_SUBUNIT_BIOGENESIS	74	0.378705	1.52699	0.0168776	0.260721	1
GO_IRON_ION_TRANSMEMBRANE_TRANSPORT	15	0.540044	1.52609	0.0459184	0.261392	1
GO_PHOTORECEPTOR_OUTER_SEGMENT_MEMBRANE	14	0.542267	1.52603	0.0656168	0.260641	1
GO_OXIDOREDUCTASE_ACTIVITY_ACTING_ON_THE_CH_NH_GROUP_OF_DONORS_NAD_OR_NADP_AS_ACCEPTOR	17	0.522032	1.52426	0.0396825	0.262678	1
GO_CILIARY_TRANSITION_ZONE	60	0.381986	1.5231	0.00409836	0.263776	1
GO_REGULATION_OF_AUTOPHAGOSOME_ASSEMBLY	36	0.432586	1.52243	0.0306122	0.264066	1
GO_EXTRACELLULAR_TRANSPORT	29	0.45521	1.52154	0.036036	0.264751	1
GO_SOLUTE_PROTON_ANTIPORTER_ACTIVITY	16	0.526566	1.51666	0.0478723	0.272124	1
GO_PORPHYRIN_CONTAINING_COMPOUND_METABOLIC_PROCESS	35	0.43936	1.51663	0.0413793	0.271301	1
GO_HISTONE_H3_K9_METHYLATION	35	0.439321	1.51607	0.020339	0.271288	1
GO_PERK_MEDIATED_UNFOLDED_PROTEIN_RESPONSE	21	0.49071	1.5155	0.025641	0.271359	1
GO_ESTABLISHMENT_OF_PROTEIN_LOCALIZATION_TO_CHROMOSOME	23	0.486402	1.51469	0.0494186	0.271808	1
GO_ENDOPLASMIC_RETICULUM_TUBULAR_NETWORK_ORGANIZATION	18	0.517951	1.51443	0.0410959	0.271376	1
GO_MODIFIED_AMINO_ACID_TRANSMEMBRANE_TRANSPORTER_ACTIVITY	18	0.509586	1.51317	0.0356164	0.272621	1
GO_MRNA_MODIFICATION	22	0.476922	1.50879	0.0612903	0.279042	1
HP_ANOTIA	11	0.580525	1.50811	0.0597403	0.279329	1
HP_EPISODIC_TACHYPNEA	31	0.443588	1.50808	0.0295082	0.278499	1
GO_NEGATIVE_REGULATION_OF_PROTEIN_EXIT_FROM_ENDOPLASMIC_RETICULUM	10	0.604461	1.5062	0.0447761	0.280782	1
HP_ABNORMALITY_OF_THE_PERIUNGUAL_REGION	13	0.546965	1.50557	0.078329	0.281023	1
GO_SPERM_AXONEME_ASSEMBLY	14	0.540446	1.5055	0.0568182	0.280294	1
HP_ABNORMAL_POSTERIOR_SEGMENT_IMAGING	10	0.604053	1.50502	0.0456731	0.280297	1
GO_CILIUM_MOVEMENT	108	0.34423	1.50487	0.0165746	0.279682	1
HP_ABNORMAL_STERNAL_OSSIFICATION	12	0.582909	1.50398	0.0605327	0.280374	1
GO_REGULATION_OF_FATTY_ACID_METABOLIC_PROCESS	81	0.359519	1.5033	0.00896861	0.280745	1
GO_COPI_COATED_VESICLE_MEMBRANE	18	0.507117	1.50205	0.0453333	0.282088	1
HP_CEREBELLAR_ATROPHY	285	0.302349	1.50194	0	0.281427	1
GO_MLL1_2_COMPLEX	29	0.452652	1.5017	0.0434783	0.280985	1
GO_REGULATION_OF_CYTOPLASMIC_TRANSLATION	27	0.452016	1.49887	0.0355987	0.284823	1
HP_MUSCULAR_HYPOTONIA_OF_THE_TRUNK	139	0.332748	1.49789	0	0.285752	1
HP_MODERATE_SENSORINEURAL_HEARING_IMPAIRMENT	32	0.425838	1.497	0.0542373	0.286408	1
GO_GOLGI_MEDIAL_CISTERNA	10	0.606745	1.49636	0.0709046	0.286611	1
GO_SAM_COMPLEX	11	0.592626	1.49618	0.0674699	0.286085	1
HP_CEREBELLAR_DYSPLASIA	17	0.508623	1.49609	0.0395778	0.285382	1
HP_SPASTIC_DYSARTHRIA	23	0.473425	1.49607	0.045584	0.284569	1
GO_PROTEIN_FOLDING_IN_ENDOPLASMIC_RETICULUM	10	0.581894	1.4958	0.0819672	0.284131	1
HP_ABSENT_OR_MINIMALLY_OSSIFIED_VERTEBRAL_BODIES	13	0.551284	1.4943	0.0712251	0.285876	1
GO_POSITIVE_REGULATION_OF_TORC1_SIGNALING	16	0.522692	1.49361	0.0452128	0.286232	1
GO_TRIGLYCERIDE_METABOLIC_PROCESS	82	0.351514	1.49183	0.0139535	0.28829	1
HP_ABNORMAL_METABOLISM	91	0.347124	1.49035	0.00578035	0.289902	1
GO_SYNTAXIN_1_BINDING	24	0.456074	1.48919	0.0396601	0.291006	1
GO_PROTEASOME_REGULATORY_PARTICLE_BASE_SUBCOMPLEX	12	0.56289	1.48903	0.0591398	0.290389	1
GO_REGULATION_OF_TORC1_SIGNALING	37	0.402715	1.48885	0.0338983	0.289863	1
HP_CHRONIC_SINUSITIS	45	0.398455	1.48715	0.0469314	0.292025	1
GO_CILIUM_ORGANIZATION	357	0.295989	1.48664	0	0.292145	1
HP_ASTROCYTOMA	17	0.502103	1.48518	0.0580475	0.293829	1
GO_NEGATIVE_REGULATION_OF_PROTEIN_ACETYLATION	19	0.518078	1.48508	0.0435897	0.293178	1
GO_RDNA_HETEROCHROMATIN_ASSEMBLY	11	0.571511	1.485	0.0661765	0.292491	1
GO_TRANSCRIPTION_ELONGATION_FROM_RNA_POLYMERASE_II_PROMOTER	80	0.356401	1.48461	0	0.292344	1
GO_RACEMASE_AND_EPIMERASE_ACTIVITY_ACTING_ON_CARBOHYDRATES_AND_DERIVATIVES	10	0.60419	1.48448	0.04914	0.291775	1
GO_G_RICH_STRAND_TELOMERIC_DNA_BINDING	10	0.596131	1.48375	0.0775	0.292256	1
GO_MRNA_CLEAVAGE_AND_POLYADENYLATION_SPECIFICITY_FACTOR_COMPLEX	18	0.505819	1.48375	0.066092	0.291437	1
GO_INNER_DYNEIN_ARM_ASSEMBLY	12	0.552547	1.48326	0.0731707	0.291529	1
GO_2_OXOGLUTARATE_METABOLIC_PROCESS	15	0.534279	1.48198	0.0534125	0.292963	1
GO_RIBONUCLEASE_ACTIVITY	102	0.341069	1.48172	0.00985222	0.292596	1
GO_REGULATION_OF_TRIGLYCERIDE_METABOLIC_PROCESS	34	0.417501	1.48073	0.0476191	0.293521	1
GO_INTRACILIARY_RETROGRADE_TRANSPORT	10	0.578335	1.48058	0.0641975	0.292971	1
HP_OSTEOSARCOMA	11	0.573037	1.48044	0.0668258	0.292395	1
GO_NCRNA_TRANSCRIPTION	103	0.342657	1.47544	0.00531915	0.300229	1
GO_POSITIVE_REGULATION_OF_CHROMATIN_ASSEMBLY_OR_DISASSEMBLY	11	0.556732	1.47532	0.0750605	0.299671	1
GO_REGULATION_OF_COLLATERAL_SPROUTING	17	0.517583	1.47517	0.0698324	0.299083	1
GO_ER_TO_GOLGI_TRANSPORT_VESICLE_MEMBRANE	56	0.377753	1.47433	0.0210526	0.299694	1
HP_MICROVESICULAR_HEPATIC_STEATOSIS	11	0.570715	1.47303	0.0657277	0.30135	1
HP_GLIOBLASTOMA_MULTIFORME	19	0.492855	1.47199	0.0658683	0.302376	1
GO_POSITIVE_REGULATION_OF_MITOCHONDRIAL_TRANSLATION	17	0.516031	1.47197	0.0612813	0.301594	1
GO_NEGATIVE_REGULATION_OF_FATTY_ACID_BIOSYNTHETIC_PROCESS	14	0.530216	1.47159	0.075067	0.301432	1
GO_TRANSITION_METAL_ION_TRANSPORT	112	0.338497	1.47151	0.00531915	0.30076	1
HP_ABNORMALITY_OF_THE_CEREBELLAR_PEDUNCLE	11	0.569166	1.46834	0.0607595	0.305695	1
HP_CLUBBING_OF_FINGERS	58	0.372022	1.46781	0.0198413	0.305801	1
GO_POSITIVE_REGULATION_OF_TOR_SIGNALING	40	0.407458	1.46712	0.0548387	0.306195	1
GO_PH_REDUCTION	50	0.388161	1.46573	0.0333333	0.307867	1
GO_REGULATION_OF_TRANSLATIONAL_FIDELITY	16	0.500995	1.46568	0.0555556	0.307131	1
GO_EXTRINSIC_COMPONENT_OF_ORGANELLE_MEMBRANE	46	0.391326	1.46564	0.0355987	0.306397	1
GO_NEGATIVE_REGULATION_OF_NUCLEOTIDE_METABOLIC_PROCESS	19	0.483099	1.46539	0.0716253	0.306015	1
GO_REGULATION_OF_TRANSLATION_IN_RESPONSE_TO_STRESS	20	0.471056	1.4639	0.0681818	0.307788	1
GO_ALCOHOL_BIOSYNTHETIC_PROCESS	137	0.327804	1.46388	0.0127389	0.306997	1
GO_REGULATION_OF_TRANSLATION_IN_RESPONSE_TO_ENDOPLASMIC_RETICULUM_STRESS	10	0.596767	1.46385	0.0693069	0.306234	1
GO_PRIMARY_AMINO_COMPOUND_METABOLIC_PROCESS	12	0.564761	1.46374	0.0700483	0.305623	1
GO_RNA_POLYMERASE_II_GENERAL_TRANSCRIPTION_INITIATION_FACTOR_BINDING	19	0.47993	1.46123	0.0613333	0.309384	1
GO_SNRNA_TRANSCRIPTION	73	0.361974	1.45828	0.0205761	0.313822	1
GO_PHAGOSOME_ACIDIFICATION	25	0.434968	1.45826	0.0432099	0.31303	1
GO_NUCLEAR_TRANSCRIBED_MRNA_CATABOLIC_PROCESS_EXONUCLEOLYTIC	35	0.419503	1.45777	0.0451613	0.313031	1
GO_TELOMERASE_RNA_BINDING	21	0.457065	1.45647	0.0541311	0.314622	1
GO_TORC1_SIGNALING	45	0.393707	1.45558	0.0264026	0.315472	1
HP_BROAD_EYEBROW	12	0.56602	1.45548	0.0794872	0.314847	1
HP_ABNORMAL_FINGERTIP_MORPHOLOGY	74	0.353849	1.45505	0.0166667	0.314911	1
GO_NUCLEOTIDE_BINDING_DOMAIN_LEUCINE_RICH_REPEAT_CONTAINING_RECEPTOR_SIGNALING_PATHWAY	37	0.408922	1.45341	0.0411392	0.317205	1
GO_ATF6_MEDIATED_UNFOLDED_PROTEIN_RESPONSE	10	0.595009	1.45291	0.0813648	0.317295	1
HP_SUPRANUCLEAR_GAZE_PALSY	33	0.426887	1.45224	0.0408805	0.3177	1
GO_AXONEMAL_DYNEIN_COMPLEX	16	0.518353	1.45196	0.0914127	0.31739	1
GO_HISTONE_DEUBIQUITINATION	23	0.45696	1.45119	0.0576369	0.317883	1
GO_STRUCTURAL_CONSTITUENT_OF_NUCLEAR_PORE	24	0.456887	1.45092	0.0586592	0.317601	1
GO_HISTONE_H3_K9_MODIFICATION	46	0.388246	1.4503	0.0234114	0.317977	1
HP_PROLONGED_PARTIAL_THROMBOPLASTIN_TIME	14	0.513781	1.44998	0.0901639	0.317748	1
GO_LYSINE_ACETYLATED_HISTONE_BINDING	21	0.485715	1.44984	0.0679348	0.317256	1
GO_NEGATIVE_REGULATION_OF_HEART_RATE	10	0.58602	1.44935	0.0813397	0.317392	1
HP_PULMONARY_CYST	14	0.524345	1.44804	0.0884719	0.318789	1
GO_TRNA_WOBBLE_URIDINE_MODIFICATION	17	0.488153	1.44752	0.0765306	0.318948	1
GO_IRON_ION_TRANSMEMBRANE_TRANSPORTER_ACTIVITY	10	0.591552	1.44683	0.0963855	0.319462	1
HP_DYSCALCULIA	17	0.502795	1.44639	0.077135	0.31947	1
GO_SET1C_COMPASS_COMPLEX	11	0.567031	1.44637	0.104326	0.318734	1
GO_PHOSPHOTRANSFERASE_ACTIVITY_FOR_OTHER_SUBSTITUTED_PHOSPHATE_GROUPS	19	0.471836	1.44603	0.0657143	0.318569	1
GO_PEPTIDYL_LYSINE_TRIMETHYLATION	46	0.386716	1.4452	0.0468227	0.319306	1
HP_PULMONARY_OPACITY	11	0.552409	1.44472	0.085213	0.319401	1
GO_REGULATION_OF_MACROAUTOPHAGY	171	0.311601	1.44302	0	0.321794	1
GO_REGULATION_OF_SHORT_TERM_NEURONAL_SYNAPTIC_PLASTICITY	13	0.539747	1.44184	0.0846994	0.323155	1
HP_TEMPORAL_CORTICAL_ATROPHY	11	0.555997	1.44123	0.0724234	0.323495	1
GO_REGULATION_OF_RETROGRADE_PROTEIN_TRANSPORT_ER_TO_CYTOSOL	13	0.552658	1.44102	0.0876289	0.323067	1
GO_FERROUS_IRON_BINDING	23	0.451186	1.43939	0.0753012	0.325224	1
HP_CHRONIC_PULMONARY_OBSTRUCTION	26	0.443488	1.43907	0.0579268	0.325029	1
GO_SNORNA_METABOLIC_PROCESS	17	0.486116	1.43757	0.0659026	0.327026	1
GO_PROTEIN_TRANSPORT_ALONG_MICROTUBULE	65	0.366401	1.43731	0.0144928	0.326761	1
GO_INTRINSIC_COMPONENT_OF_ENDOPLASMIC_RETICULUM_MEMBRANE	154	0.310633	1.43679	0	0.326917	1
GO_CYTOPLASMIC_TRANSLATIONAL_INITIATION	35	0.396416	1.43627	0.040678	0.327069	1
GO_DNA_TEMPLATED_TRANSCRIPTION_ELONGATION	109	0.328606	1.43618	0.0380435	0.326482	1
GO_PHOTORECEPTOR_CELL_DIFFERENTIATION	51	0.370616	1.43615	0.0471015	0.325734	1
GO_REGULATION_OF_ENDOPLASMIC_RETICULUM_STRESS_INDUCED_INTRINSIC_APOPTOTIC_SIGNALING_PATHWAY	29	0.430013	1.43528	0.06875	0.326592	1
HP_MICROTIA_THIRD_DEGREE	10	0.569005	1.43512	0.109974	0.326069	1
GO_PEPTIDYL_ASPARAGINE_MODIFICATION	30	0.429626	1.43462	0.0421348	0.326176	1
GO_EXORIBONUCLEASE_COMPLEX	26	0.438506	1.43349	0.0833333	0.327476	1
GO_REGULATION_OF_NEURON_MATURATION	10	0.562115	1.43309	0.0982801	0.32749	1
GO_CHROMOSOME_TELOMERIC_REGION	132	0.312553	1.43175	0	0.329214	1
GO_ORGANELLE_DISASSEMBLY	108	0.327518	1.4303	0.0107527	0.331149	1
GO_CELLULAR_RESPONSE_TO_CADMIUM_ION	32	0.42546	1.43028	0.0647249	0.330402	1
GO_CYTOPLASMIC_UBIQUITIN_LIGASE_COMPLEX	14	0.517256	1.43002	0.0767263	0.330165	1
GO_TRANSCRIPTION_COACTIVATOR_BINDING	27	0.433443	1.42984	0.0483384	0.329673	1
HP_DIMINISHED_MOTIVATION	51	0.384634	1.42957	0.0245614	0.329369	1
GO_PROTON_TRANSPORTING_V_TYPE_ATPASE_COMPLEX	26	0.435439	1.42941	0.0714286	0.328912	1
HP_RESTRICTIVE_BEHAVIOR	13	0.519402	1.42713	0.0951087	0.332373	1
GO_U3_SNORNA_BINDING	10	0.559392	1.42689	0.0827068	0.332016	1
GO_SMOOTH_ENDOPLASMIC_RETICULUM	30	0.407343	1.42661	0.0589971	0.331811	1
HP_TYPE_I_TRANSFERRIN_ISOFORM_PROFILE	16	0.494821	1.42598	0.0704607	0.332138	1
HP_TETANY	15	0.509294	1.42559	0.0837696	0.332068	1
GO_TRANSFERASE_ACTIVITY_TRANSFERRING_ONE_CARBON_GROUPS	210	0.294561	1.42559	0	0.331305	1
GO_SNORNA_3_END_PROCESSING	13	0.528903	1.42555	0.0798898	0.330618	1
GO_REGULATION_OF_TRANSLATIONAL_INITIATION_IN_RESPONSE_TO_STRESS	14	0.513583	1.42514	0.0906736	0.330576	1
GO_MITOCHONDRIAL_RNA_METABOLIC_PROCESS	43	0.387777	1.42429	0.0511182	0.331379	1
GO_REGULATION_OF_ERAD_PATHWAY	30	0.423189	1.42372	0.0621302	0.331703	1
GO_FOLIC_ACID_METABOLIC_PROCESS	18	0.483185	1.42315	0.091954	0.331977	1
GO_REGULATION_OF_TRANSLATIONAL_INITIATION_BY_EIF2_ALPHA_PHOSPHORYLATION	10	0.557967	1.42232	0.0966057	0.332722	1
GO_MEMBRANE_LIPID_CATABOLIC_PROCESS	32	0.410201	1.4213	0.0704698	0.333833	1
GO_MISMATCH_REPAIR_COMPLEX	10	0.562699	1.42129	0.0982801	0.333094	1
GO_MEDIATOR_COMPLEX	41	0.392672	1.42107	0.0627178	0.332723	1
GO_REPLISOME	25	0.443061	1.41956	0.0621469	0.334838	1
GO_RNA_POLYMERASE_II_PREINITIATION_COMPLEX_ASSEMBLY	25	0.432764	1.41867	0.0769231	0.335751	1
GO_SPLICEOSOMAL_COMPLEX	189	0.304538	1.41844	0	0.335461	1
GO_POSITIVE_REGULATION_OF_PROTEIN_POLYUBIQUITINATION	12	0.527126	1.41745	0.0875332	0.336512	1
GO_S_ADENOSYLMETHIONINE_DEPENDENT_METHYLTRANSFERASE_ACTIVITY	150	0.308849	1.41689	0.011976	0.336795	1
GO_ROUGH_ENDOPLASMIC_RETICULUM_MEMBRANE	29	0.43028	1.41591	0.0703364	0.337936	1
HP_LEWY_BODIES	18	0.477008	1.41587	0.106443	0.337268	1
HP_ABNORMALITY_OF_THE_VERTEBRAL_ENDPLATES	30	0.414799	1.41538	0.0679012	0.337372	1
GO_RESPONSE_TO_SALT_STRESS	23	0.443128	1.41529	0.0798898	0.336779	1
GO_LOW_DENSITY_LIPOPROTEIN_PARTICLE_CLEARANCE	31	0.417093	1.41499	0.0868263	0.336539	1
GO_NUCLEAR_EXOSOME_RNASE_COMPLEX	16	0.490398	1.41482	0.0803109	0.336105	1
GO_NEUTRAL_LIPID_BIOSYNTHETIC_PROCESS	42	0.383595	1.41404	0.0541516	0.336778	1
GO_AUTOPHAGY_OF_NUCLEUS	14	0.516366	1.41404	0.0918919	0.336048	1
GO_REGULATION_OF_MITOCHONDRIAL_GENE_EXPRESSION	29	0.417947	1.41307	0.0660066	0.337283	1
GO_SYNTAXIN_BINDING	67	0.351521	1.41232	0.0357143	0.337966	1
GO_POSITIVE_REGULATION_OF_TRIGLYCERIDE_BIOSYNTHETIC_PROCESS	13	0.523169	1.41181	0.0857143	0.338249	1
GO_TRANSLATIONAL_ELONGATION	131	0.311435	1.4117	0.00625	0.337721	1
GO_RNA_SURVEILLANCE	15	0.498509	1.41125	0.0966851	0.33779	1
GO_PROTEIN_PHOSPHATASE_TYPE_1_COMPLEX	15	0.506791	1.41111	0.0783784	0.33733	1
HP_LANGUAGE_IMPAIRMENT	39	0.390188	1.40976	0.033557	0.339133	1
HP_PANCREATIC_FIBROSIS	20	0.457722	1.40962	0.101744	0.338676	1
HP_ABNORMAL_SENSORY_NERVE_CONDUCTION_VELOCITY	16	0.485298	1.40944	0.0758427	0.338258	1
GO_POSITIVE_REGULATION_BY_HOST_OF_VIRAL_TRANSCRIPTION	17	0.490067	1.40874	0.0837696	0.338791	1
HP_LOW_FRUSTRATION_TOLERANCE	14	0.505997	1.40867	0.0808625	0.338185	1
GO_COLLATERAL_SPROUTING	24	0.447097	1.40812	0.0816327	0.338545	1
GO_NUCLEAR_PORE_NUCLEAR_BASKET	12	0.526012	1.40647	0.0994318	0.3408	1
HP_HALLUCINATIONS	120	0.322122	1.40642	0.00537634	0.340183	1
GO_HSP70_PROTEIN_BINDING	40	0.387571	1.40631	0.0365854	0.33966	1
GO_PLASMA_MEMBRANE_FUSION	11	0.540195	1.40614	0.0935252	0.33928	1
GO_METHYLATED_HISTONE_BINDING	64	0.355849	1.40581	0.025974	0.33915	1
GO_AGGRESOME	34	0.396765	1.40504	0.0498339	0.339899	1
GO_TRANSITION_METAL_ION_HOMEOSTASIS	124	0.314504	1.4021	0.0160428	0.344617	1
GO_METHYLATION	325	0.272223	1.40144	0	0.345154	1
GO_HISTONE_H3_ACETYLATION	59	0.351424	1.40104	0.0416667	0.345215	1
GO_MITOCHONDRIAL_RNA_PROCESSING	16	0.496024	1.40082	0.0787402	0.344888	1
GO_MKS_COMPLEX	13	0.513098	1.40068	0.0953608	0.344447	1
GO_POSITIVE_REGULATION_OF_DNA_TEMPLATED_TRANSCRIPTION_ELONGATION	26	0.435807	1.39973	0.0785499	0.345581	1
GO_LINOLEIC_ACID_METABOLIC_PROCESS	19	0.468169	1.3997	0.0826211	0.344916	1
GO_POSITIVE_REGULATION_OF_TRANSCRIPTION_ELONGATION_FROM_RNA_POLYMERASE_II_PROMOTER	12	0.533342	1.39932	0.0972973	0.34494	1
GO_MITOCHONDRIAL_GENE_EXPRESSION	161	0.300124	1.39883	0.00833333	0.345146	1
HP_PARAPARESIS	60	0.350377	1.39874	0.0393701	0.344603	1
GO_POSITIVE_REGULATION_OF_FATTY_ACID_OXIDATION	12	0.517143	1.39852	0.129032	0.344307	1
GO_PREASSEMBLY_OF_GPI_ANCHOR_IN_ER_MEMBRANE	16	0.491247	1.39767	0.097561	0.345245	1
GO_MATURATION_OF_5_8S_RRNA	36	0.396606	1.39732	0.0564263	0.345154	1
GO_AUTOPHAGOSOME_MATURATION	39	0.381033	1.39662	0.0528053	0.345733	1
HP_ABNORMAL_RENAL_MEDULLA_MORPHOLOGY	43	0.374369	1.39576	0.0496454	0.346608	1
HP_DEEP_PALMAR_CREASE	21	0.449068	1.39551	0.0648148	0.346357	1
GO_TIM23_MITOCHONDRIAL_IMPORT_INNER_MEMBRANE_TRANSLOCASE_COMPLEX	13	0.522308	1.39542	0.0712468	0.345833	1
GO_ARF_PROTEIN_SIGNAL_TRANSDUCTION	18	0.479877	1.3952	0.0798898	0.345551	1
GO_PROTEIN_REFOLDING	23	0.434857	1.3951	0.0929578	0.345019	1
GO_PROCESS_UTILIZING_AUTOPHAGIC_MECHANISM	504	0.266776	1.39462	0	0.345156	1
GO_EXORIBONUCLEASE_ACTIVITY	40	0.386399	1.39079	0.0505415	0.351604	1
GO_CEREBELLAR_PURKINJE_CELL_LAYER_MORPHOGENESIS	16	0.48052	1.39061	0.102857	0.351177	1
GO_SMALL_NUCLEOLAR_RIBONUCLEOPROTEIN_COMPLEX_ASSEMBLY	11	0.555411	1.38989	0.127551	0.351845	1
GO_GENERAL_TRANSCRIPTION_INITIATION_FACTOR_BINDING	44	0.372991	1.38858	0.0528053	0.353568	1
HP_LARYNGEAL_DYSTONIA	10	0.548341	1.38852	0.121495	0.352973	1
GO_NUCLEOTIDE_TRANSPORT	31	0.399314	1.38796	0.0644068	0.353348	1
HP_HIP_FLEXOR_WEAKNESS	12	0.532627	1.38734	0.119171	0.353867	1
HP_HOMOCYSTINURIA	10	0.544969	1.38609	0.123487	0.355456	1
HP_SCLERODERMA	10	0.564711	1.38426	0.133508	0.358158	1
HP_MACROVESICULAR_HEPATIC_STEATOSIS	11	0.533952	1.38419	0.105392	0.357583	1
GO_POSITIVE_REGULATION_OF_PROTEIN_EXIT_FROM_ENDOPLASMIC_RETICULUM	14	0.501425	1.38301	0.110512	0.359007	1
GO_CELLULAR_RESPONSE_TO_NITROGEN_STARVATION	12	0.534538	1.38243	0.124352	0.359396	1
GO_VESICLE_BUDDING_FROM_MEMBRANE	107	0.315486	1.38218	0.0199005	0.359139	1
HP_SLENDER_LONG_BONE	36	0.386975	1.38014	0.0622951	0.362333	1
GO_UBIQUINONE_METABOLIC_PROCESS	20	0.462727	1.37952	0.0891892	0.362833	1
GO_NEGATIVE_REGULATION_OF_HISTONE_ACETYLATION	14	0.504004	1.37948	0.115281	0.362215	1
GO_MATURATION_OF_LSU_RRNA_FROM_TRICISTRONIC_RRNA_TRANSCRIPT_SSU_RRNA_5_8S_RRNA_LSU_RRNA	15	0.486111	1.37939	0.106667	0.361679	1
GO_TRANSCRIPTION_BY_RNA_POLYMERASE_III	45	0.366239	1.37831	0.05	0.363069	1
GO_ISOPRENOID_BIOSYNTHETIC_PROCESS	23	0.441345	1.37807	0.0942857	0.362823	1
GO_VOLTAGE_GATED_CHLORIDE_CHANNEL_ACTIVITY	11	0.53871	1.37624	0.119048	0.365571	1
GO_REGULATION_OF_HISTONE_H3_K9_METHYLATION	21	0.448434	1.37497	0.0857143	0.367317	1
GO_STEROID_HORMONE_RECEPTOR_ACTIVITY	24	0.42651	1.3737	0.0911765	0.369	1
GO_NEUTRAL_LIPID_METABOLIC_PROCESS	108	0.308348	1.37344	0.0207254	0.368777	1
GO_REGULATION_OF_HEXOKINASE_ACTIVITY	10	0.549083	1.37253	0.143519	0.369945	1
GO_SEQUENCE_SPECIFIC_SINGLE_STRANDED_DNA_BINDING	15	0.48681	1.37198	0.109589	0.3703	1
GO_TRNA_WOBBLE_BASE_MODIFICATION	21	0.441996	1.37069	0.0942857	0.37209	1
GO_SNARE_COMPLEX	43	0.371911	1.37039	0.0599251	0.371936	1
GO_DYNEIN_INTERMEDIATE_CHAIN_BINDING	27	0.406514	1.37016	0.0860534	0.371675	1
GO_PHOSPHORYLATION_OF_RNA_POLYMERASE_II_C_TERMINAL_DOMAIN	12	0.521316	1.36804	0.136247	0.375173	1
GO_FORMATION_OF_CYTOPLASMIC_TRANSLATION_INITIATION_COMPLEX	16	0.485167	1.36739	0.123989	0.375797	1
GO_CARBOXY_TERMINAL_DOMAIN_PROTEIN_KINASE_COMPLEX	20	0.4403	1.36735	0.0994152	0.375161	1
HP_LOWER_LIMB_HYPERREFLEXIA	45	0.364419	1.36651	0.0747331	0.376143	1
GO_CARBOHYDRATE_DERIVATIVE_TRANSPORT	78	0.321687	1.3662	0.0510638	0.376075	1
GO_ACETYLCHOLINE_RECEPTOR_ACTIVITY	14	0.493238	1.36484	0.118421	0.378109	1
HP_PARKINSONISM	96	0.3229	1.36461	0.0253807	0.37782	1
GO_REGULATION_OF_HISTONE_H3_K9_ACETYLATION	11	0.533196	1.36448	0.125945	0.377367	1
HP_APRAXIA	148	0.299706	1.36422	0.0208333	0.377139	1
GO_NUCLEOTIDE_TRANSMEMBRANE_TRANSPORTER_ACTIVITY	28	0.413784	1.36415	0.0931677	0.376539	1
GO_ACETYLCHOLINE_GATED_CHANNEL_COMPLEX	10	0.546348	1.36404	0.131707	0.376052	1
GO_RESPONSE_TO_INTERLEUKIN_18	10	0.535304	1.36319	0.120098	0.377062	1
GO_CELLULAR_COMPONENT_MAINTENANCE	52	0.355947	1.36319	0.0830325	0.376359	1
GO_PROTEIN_LOCALIZATION_TO_GOLGI_APPARATUS	26	0.411511	1.36256	0.107143	0.376866	1
HP_EMG_DECREMENTAL_RESPONSE_OF_COMPOUND_MUSCLE_ACTION_POTENTIAL_TO_REPETITIVE_NERVE_STIMULATION	22	0.442594	1.36169	0.084507	0.377847	1
HP_SPONTANEOUS_ABORTION	54	0.346322	1.36105	0.0390625	0.378431	1
GO_SNARE_BINDING	100	0.312996	1.36067	0.0292683	0.378427	1
GO_VACUOLAR_MEMBRANE	394	0.261553	1.36038	0	0.378258	1
GO_NK_T_CELL_ACTIVATION	10	0.546162	1.36002	0.137755	0.378298	1
HP_SHORTENING_OF_ALL_DISTAL_PHALANGES_OF_THE_FINGERS	38	0.386705	1.35917	0.0646258	0.37936	1
HP_POSTAXIAL_FOOT_POLYDACTYLY	47	0.359032	1.35909	0.070922	0.37881	1
GO_ACETYL_COA_METABOLIC_PROCESS	36	0.381981	1.35745	0.0677419	0.381374	1
HP_ATELECTASIS	60	0.334721	1.3572	0.0850202	0.381172	1
GO_NEGATIVE_REGULATION_OF_MACROAUTOPHAGY	34	0.384256	1.3564	0.0920245	0.382109	1
GO_PRERIBOSOME_SMALL_SUBUNIT_PRECURSOR	15	0.479534	1.35635	0.145729	0.381511	1
GO_TASTE_RECEPTOR_ACTIVITY	13	0.503504	1.35516	0.119565	0.383164	1
GO_NEGATIVE_REGULATION_OF_PROTEASOMAL_PROTEIN_CATABOLIC_PROCESS	52	0.360894	1.3551	0.0557491	0.3826	1
GO_MRNA_CLEAVAGE_FACTOR_COMPLEX	22	0.435526	1.35479	0.0983146	0.382543	1
HP_PULMONARY_FIBROSIS	44	0.363678	1.35469	0.068323	0.382036	1
GO_PROTOPORPHYRINOGEN_IX_METABOLIC_PROCESS	10	0.55183	1.35466	0.170264	0.381397	1
GO_ACTIVATION_OF_JUN_KINASE_ACTIVITY	38	0.383381	1.35386	0.0653595	0.382272	1
HP_ABNORMAL_SALIVARY_GLAND_MORPHOLOGY	13	0.503382	1.35368	0.126238	0.381973	1
GO_INTRACILIARY_TRANSPORT	51	0.360929	1.35355	0.0690909	0.381546	1
GO_CELLULAR_RESPONSE_TO_GLUCOSE_STARVATION	49	0.357246	1.35292	0.0586319	0.382139	1
GO_GLYCOLIPID_CATABOLIC_PROCESS	13	0.495327	1.35242	0.119107	0.382458	1
GO_MITOCHONDRIAL_DNA_METABOLIC_PROCESS	13	0.505424	1.35155	0.124031	0.383481	1
GO_SOLUTE_CATION_SYMPORTER_ACTIVITY	69	0.336059	1.35144	0.0446097	0.383048	1
GO_ENDOPLASMIC_RETICULUM_QUALITY_CONTROL_COMPARTMENT	21	0.444344	1.35099	0.0949721	0.383271	1
GO_NOTCH_RECEPTOR_PROCESSING	10	0.550348	1.35092	0.118421	0.382757	1
GO_DICARBOXYLIC_ACID_METABOLIC_PROCESS	83	0.318723	1.35004	0.0208333	0.383765	1
HP_ABNORMALITY_OF_THE_NASAL_MUCOSA	48	0.353915	1.34804	0.0988593	0.387076	1
HP_CHRONIC_OTITIS_MEDIA	109	0.309276	1.34801	0.0220994	0.386421	1
GO_NEUTRAL_AMINO_ACID_TRANSMEMBRANE_TRANSPORTER_ACTIVITY	29	0.404405	1.34731	0.100917	0.387093	1
GO_REGULATION_OF_BICELLULAR_TIGHT_JUNCTION_ASSEMBLY	21	0.432378	1.3467	0.102857	0.387641	1
GO_MRNA_CLEAVAGE	22	0.436969	1.34503	0.113636	0.390319	1
GO_CHOLESTEROL_STORAGE	15	0.477254	1.34481	0.128609	0.390084	1
GO_VOLTAGE_GATED_ANION_CHANNEL_ACTIVITY	16	0.473324	1.34394	0.126316	0.391222	1
GO_POSITIVE_REGULATION_OF_TRANSCRIPTION_INITIATION_FROM_RNA_POLYMERASE_II_PROMOTER	30	0.399822	1.34321	0.104938	0.392001	1
GO_NUCLEAR_PORE	76	0.332232	1.34307	0.0478261	0.391605	1
GO_NEGATIVE_REGULATION_OF_RESPONSE_TO_REACTIVE_OXYGEN_SPECIES	16	0.476999	1.34237	0.135734	0.392452	1
GO_PHOSPHATIDYLINOSITOL_BISPHOSPHATE_PHOSPHATASE_ACTIVITY	23	0.412502	1.34181	0.106017	0.392877	1
HP_JUVENILE_RHEUMATOID_ARTHRITIS	13	0.498961	1.34073	0.132275	0.394327	1
GO_DNA_REPAIR_COMPLEX	38	0.382358	1.34023	0.0915254	0.394706	1
GO_CERAMIDE_CATABOLIC_PROCESS	18	0.452225	1.33919	0.118644	0.396154	1
HP_DECREASED_SIZE_OF_NERVE_TERMINALS	13	0.490352	1.33895	0.142091	0.395956	1
GO_PEPTIDE_N_ACETYLTRANSFERASE_ACTIVITY	60	0.342786	1.33835	0.0627615	0.396507	1
GO_REGULATION_OF_AUTOPHAGY	329	0.268521	1.33803	0	0.396451	1
GO_SWR1_COMPLEX	12	0.501936	1.33795	0.141274	0.395914	1
HP_EEG_WITH_ABNORMALLY_SLOW_FREQUENCIES	50	0.352069	1.33782	0.0555556	0.395454	1
HP_TITUBATION	11	0.5093	1.33756	0.157635	0.395333	1
GO_NEGATIVE_REGULATION_OF_ENDOPLASMIC_RETICULUM_UNFOLDED_PROTEIN_RESPONSE	13	0.509489	1.33748	0.139108	0.394794	1
GO_REGULATION_OF_IRE1_MEDIATED_UNFOLDED_PROTEIN_RESPONSE	14	0.490895	1.3366	0.134831	0.395906	1
GO_MRNA_PROCESSING	497	0.249379	1.33549	0	0.397472	1
GO_PROTEIN_LOCALIZATION_TO_CILIUM	55	0.345513	1.33498	0.0503597	0.397834	1
GO_DIACYLGLYCEROL_METABOLIC_PROCESS	22	0.427698	1.33489	0.0974212	0.397333	1
HP_AKINESIA	23	0.427804	1.33458	0.123209	0.397284	1
GO_GOLGI_LOCALIZATION	13	0.494419	1.33432	0.121134	0.397118	1
HP_MILD_HEARING_IMPAIRMENT	36	0.378528	1.33431	0.0881356	0.39645	1
GO_GOLGI_VESICLE_TRANSPORT	353	0.26314	1.3331	0	0.398249	1
GO_CUL4_RING_E3_UBIQUITIN_LIGASE_COMPLEX	31	0.391809	1.33287	0.109589	0.398047	1
GO_REGULATION_OF_MRNA_3_END_PROCESSING	28	0.406572	1.33278	0.0863095	0.397573	1
HP_PROGRESSIVE_NIGHT_BLINDNESS	73	0.32749	1.33275	0.0323887	0.396949	1
GO_PIGMENT_METABOLIC_PROCESS	60	0.334289	1.33259	0.0696721	0.396593	1
GO_ENDONUCLEOLYTIC_CLEAVAGE_IN_ITS1_TO_SEPARATE_SSU_RRNA_FROM_5_8S_RRNA_AND_LSU_RRNA_FROM_TRICISTRONIC_RRNA_TRANSCRIPT_SSU_RRNA_5_8S_RRNA_LSU_RRNA	10	0.535552	1.3325	0.149038	0.39612	1
HP_IRIDOCYCLITIS	10	0.526094	1.3315	0.147208	0.3974	1
GO_CILIUM_OR_FLAGELLUM_DEPENDENT_CELL_MOTILITY	80	0.319398	1.33048	0.0570175	0.398692	1
GO_CELLULAR_RESPONSE_TO_STEROL_DEPLETION	15	0.459789	1.32903	0.141711	0.400968	1
HP_ABNORMAL_PULMONARY_THORACIC_IMAGING_FINDING	56	0.342623	1.32883	0.0652174	0.400698	1
HP_APLASTIC_ANEMIA	20	0.432367	1.32872	0.147727	0.400252	1
GO_DRUG_BINDING	80	0.313284	1.32837	0.0125523	0.400289	1
GO_TRNA_THREONYLCARBAMOYLADENOSINE_METABOLIC_PROCESS	13	0.485581	1.32793	0.101604	0.400559	1
HP_ABNORMAL_BLOOD_PHOSPHATE_CONCENTRATION	48	0.355089	1.3278	0.0646258	0.400132	1
GO_NUCLEOTIDE_BINDING_OLIGOMERIZATION_DOMAIN_CONTAINING_2_SIGNALING_PATHWAY	14	0.47635	1.32735	0.105714	0.400441	1
GO_MICROBODY_MEMBRANE	59	0.33535	1.32719	0.056	0.400122	1
GO_L_AMINO_ACID_TRANSMEMBRANE_TRANSPORTER_ACTIVITY	44	0.358991	1.32684	0.0747331	0.400156	1
HP_ABNORMALITY_OF_THE_PONS	48	0.354161	1.32663	0.080292	0.399904	1
GO_CAJAL_BODY	65	0.324068	1.32654	0.0780142	0.39942	1
GO_GLYCOSIDE_METABOLIC_PROCESS	19	0.449271	1.326	0.125683	0.399831	1
GO_CELLULAR_RESPONSE_TO_ESTROGEN_STIMULUS	15	0.474486	1.3256	0.13079	0.399933	1
GO_WATER_SOLUBLE_VITAMIN_METABOLIC_PROCESS	72	0.321629	1.32545	0.0304183	0.39961	1
GO_PHOSPHATIDYLINOSITOL_PHOSPHATE_PHOSPHATASE_ACTIVITY	32	0.386826	1.32497	0.0990712	0.39997	1
GO_CLEAVAGE_INVOLVED_IN_RRNA_PROCESSING	28	0.394552	1.3248	0.125767	0.39963	1
GO_RNA_PHOSPHODIESTER_BOND_HYDROLYSIS_ENDONUCLEOLYTIC	75	0.327016	1.32465	0.0425532	0.399256	1
GO_PROTEIN_ACETYLATION	184	0.2767	1.32437	0.0232558	0.399181	1
GO_BASIC_AMINO_ACID_TRANSMEMBRANE_TRANSPORTER_ACTIVITY	12	0.490687	1.32429	0.164894	0.398684	1
GO_ENDONUCLEOLYTIC_CLEAVAGE_INVOLVED_IN_RRNA_PROCESSING	16	0.466584	1.32382	0.146667	0.398898	1
GO_POSITIVE_REGULATION_OF_TRANSLATIONAL_INITIATION	24	0.409809	1.32335	0.111111	0.399168	1
GO_ENERGY_HOMEOSTASIS	30	0.390553	1.32331	0.111111	0.398626	1
GO_SINGLE_STRANDED_TELOMERIC_DNA_BINDING	12	0.517195	1.32331	0.156085	0.397985	1
HP_KETOACIDOSIS	22	0.42497	1.32204	0.11875	0.399885	1
GO_ENDOPLASMIC_RETICULUM_ORGANIZATION	65	0.332974	1.32159	0.0666667	0.400077	1
GO_NEGATIVE_REGULATION_OF_ERAD_PATHWAY	14	0.479867	1.32108	0.121372	0.400511	1
GO_AUTOLYSOSOME	10	0.528442	1.32085	0.150754	0.400375	1
HP_RESTING_TREMOR	37	0.37869	1.32066	0.0931677	0.400122	1
GO_ATP_DEPENDENT_MICROTUBULE_MOTOR_ACTIVITY	31	0.380835	1.32018	0.126623	0.400449	1
GO_TRANSITION_METAL_ION_TRANSMEMBRANE_TRANSPORTER_ACTIVITY	34	0.381011	1.32017	0.0996885	0.39983	1
GO_GAMMA_TUBULIN_COMPLEX	20	0.4314	1.31991	0.13089	0.39973	1
HP_CHRONIC_HEPATIC_FAILURE	13	0.488981	1.31957	0.136	0.399797	1
GO_ACYLGLYCEROL_LIPASE_ACTIVITY	12	0.493335	1.31943	0.151134	0.399447	1
GO_NUCLEAR_TRANSCRIBED_MRNA_CATABOLIC_PROCESS_EXONUCLEOLYTIC_3_5	10	0.53365	1.31891	0.166259	0.399877	1
GO_MITOCHONDRIAL_DNA_REPLICATION	13	0.493551	1.31828	0.165789	0.400479	1
GO_LATE_ENDOSOME_TO_VACUOLE_TRANSPORT_VIA_MULTIVESICULAR_BODY_SORTING_PATHWAY	17	0.455897	1.3174	0.126005	0.401576	1
HP_HIP_SUBLUXATION	10	0.537221	1.3174	0.149038	0.400947	1
GO_MLL3_4_COMPLEX	12	0.504255	1.31573	0.167939	0.403733	1
GO_REGULATION_OF_RNA_POLYMERASE_II_REGULATORY_REGION_SEQUENCE_SPECIFIC_DNA_BINDING	13	0.497798	1.31568	0.13369	0.403193	1
GO_TRIGLYCERIDE_CATABOLIC_PROCESS	26	0.402756	1.31508	0.114198	0.403768	1
GO_SPERM_CAPACITATION	13	0.490013	1.31502	0.164589	0.403249	1
GO_MAMMARY_GLAND_ALVEOLUS_DEVELOPMENT	16	0.456019	1.31498	0.135359	0.402724	1
HP_TOENAIL_DYSPLASIA	12	0.490689	1.31476	0.15601	0.402532	1
HP_ELEVATED_TISSUE_NON_SPECIFIC_ALKALINE_PHOSPHATASE	10	0.529628	1.31399	0.17284	0.403491	1
GO_INTRINSIC_COMPONENT_OF_NUCLEAR_INNER_MEMBRANE	12	0.497107	1.31363	0.172131	0.403508	1
GO_SNRNA_METABOLIC_PROCESS	36	0.373198	1.31297	0.105105	0.404221	1
HP_SPARSE_LATERAL_EYEBROW	15	0.465458	1.31289	0.12938	0.40376	1
GO_NEGATIVE_REGULATION_OF_ATP_METABOLIC_PROCESS	24	0.40038	1.31285	0.138235	0.403229	1
GO_SPERM_EGG_RECOGNITION	39	0.364726	1.3125	0.0893471	0.403327	1
GO_CARBOHYDRATE_PHOSPHORYLATION	23	0.411972	1.31244	0.128134	0.402832	1
GO_PROTON_TRANSPORTING_TWO_SECTOR_ATPASE_COMPLEX_ASSEMBLY	12	0.494072	1.31244	0.160105	0.402213	1
HP_HYPOPROTEINEMIA	11	0.493878	1.31195	0.170561	0.402574	1
GO_RESPONSE_TO_LEUCINE	10	0.518069	1.3109	0.161446	0.4041	1
HP_DIPLOPIA	66	0.330389	1.31082	0.055794	0.403694	1
GO_RESPONSE_TO_ETHER	11	0.497351	1.31062	0.167109	0.403484	1
GO_SPLEEN_DEVELOPMENT	29	0.389646	1.31062	0.107362	0.402868	1
GO_TBP_CLASS_PROTEIN_BINDING	26	0.39456	1.31059	0.122563	0.402332	1
GO_PSEUDOURIDINE_SYNTHASE_ACTIVITY	13	0.497068	1.30956	0.160305	0.403745	1
HP_SYMPTOMATIC_SEIZURES	24	0.407755	1.30906	0.146032	0.404151	1
GO_CELLULAR_RESPONSE_TO_ARSENIC_CONTAINING_SUBSTANCE	20	0.422458	1.30865	0.145299	0.404329	1
GO_PROTEIN_LIPID_COMPLEX_ASSEMBLY	27	0.402212	1.30757	0.123028	0.405961	1
HP_CONE_CONE_ROD_DYSTROPHY	25	0.398711	1.30733	0.134185	0.405786	1
HP_PLEURITIS	21	0.424926	1.30716	0.132948	0.40554	1
GO_REGULATION_OF_DNA_METHYLATION	21	0.436248	1.30667	0.128852	0.405896	1
GO_COPI_VESICLE_COAT	13	0.490496	1.30663	0.170103	0.405341	1
HP_RESTLESS_LEGS	13	0.493329	1.30562	0.143979	0.406777	1
GO_NUCLEOSIDE_BISPHOSPHATE_BIOSYNTHETIC_PROCESS	65	0.327509	1.30556	0.0866142	0.406307	1
GO_PYROPHOSPHATE_HYDROLYSIS_DRIVEN_PROTON_TRANSMEMBRANE_TRANSPORTER_ACTIVITY	26	0.390815	1.30529	0.109756	0.406253	1
HP_INTERSTITIAL_PULMONARY_ABNORMALITY	62	0.328897	1.30474	0.0793651	0.406664	1
GO_DNA_POLYMERASE_COMPLEX	20	0.43499	1.30387	0.128571	0.407764	1
GO_STEROL_METABOLIC_PROCESS	144	0.286275	1.30379	0.0414201	0.407315	1
GO_REGULATION_OF_PROTEIN_LOCALIZATION_TO_CENTROSOME	10	0.521504	1.30352	0.175355	0.407201	1
HP_PARKINSONISM_WITH_FAVORABLE_RESPONSE_TO_DOPAMINERGIC_MEDICATION	18	0.444897	1.30303	0.149333	0.407597	1
GO_COPII_COATED_ER_TO_GOLGI_TRANSPORT_VESICLE	87	0.311144	1.3029	0.0730594	0.407276	1
GO_NEGATIVE_REGULATION_OF_ENDOPLASMIC_RETICULUM_STRESS_INDUCED_INTRINSIC_APOPTOTIC_SIGNALING_PATHWAY	18	0.438958	1.3026	0.140496	0.407267	1
GO_PCG_PROTEIN_COMPLEX	45	0.355592	1.30151	0.0976562	0.408878	1
GO_CELL_DIFFERENTIATION_IN_HINDBRAIN	18	0.435411	1.30069	0.143258	0.409938	1
GO_ENDOSOME_ORGANIZATION	77	0.315354	1.30065	0.0646552	0.409399	1
GO_RESPONSE_TO_ZINC_ION	47	0.345875	1.29964	0.0622711	0.41084	1
GO_NON_MOTILE_CILIUM_ASSEMBLY	51	0.347238	1.29892	0.104869	0.411658	1
HP_HYPOCHOLESTEROLEMIA	10	0.512883	1.29832	0.175	0.412254	1
HP_ABNORMAL_SACCADIC_EYE_MOVEMENTS	67	0.319504	1.29764	0.0717132	0.413111	1
HP_ABNORMAL_DRINKING_BEHAVIOR	26	0.403919	1.29745	0.133929	0.412837	1
GO_REGULATION_OF_DEVELOPMENTAL_PIGMENTATION	13	0.484509	1.29734	0.168798	0.412428	1
HP_MACULAR_DYSTROPHY	17	0.44208	1.29701	0.141618	0.41246	1
HP_COLLECTIONISM	11	0.510613	1.29644	0.164921	0.413044	1
HP_URINARY_GLYCOSAMINOGLYCAN_EXCRETION	16	0.440171	1.29522	0.15978	0.414938	1
GO_RRNA_CONTAINING_RIBONUCLEOPROTEIN_COMPLEX_EXPORT_FROM_NUCLEUS	15	0.454494	1.29393	0.152455	0.416954	1
GO_PROGRAMMED_CELL_DEATH_INVOLVED_IN_CELL_DEVELOPMENT	12	0.49912	1.29336	0.194149	0.417583	1
GO_EPITHELIAL_CELL_PROLIFERATION_INVOLVED_IN_PROSTATE_GLAND_DEVELOPMENT	11	0.501579	1.29282	0.166259	0.418122	1
GO_PROTEIN_FOLDING_CHAPERONE	24	0.409901	1.29189	0.145631	0.419482	1
HP_WIDE_CRANIAL_SUTURES	22	0.422236	1.29185	0.16208	0.418967	1
GO_REGULATION_OF_CILIUM_MOVEMENT	23	0.41126	1.29094	0.146893	0.420114	1
GO_ORGANIC_ANION_TRANSMEMBRANE_TRANSPORTER_ACTIVITY	182	0.269713	1.29085	0.04	0.419695	1
GO_EXON_EXON_JUNCTION_COMPLEX	20	0.429195	1.29039	0.123563	0.420014	1
GO_PROTEASOME_ASSEMBLY	13	0.477142	1.29032	0.191136	0.419536	1
GO_TELOMERIC_DNA_BINDING	34	0.36653	1.28972	0.0992908	0.420168	1
GO_MITOCHONDRIAL_TRANSLATION	133	0.285476	1.289	0.0702703	0.421033	1
GO_REGULATION_OF_CELLULAR_PH	80	0.30838	1.28882	0.0788382	0.420788	1
GO_LONG_CHAIN_FATTY_ACID_BIOSYNTHETIC_PROCESS	28	0.392189	1.28835	0.123778	0.421108	1
GO_HOPS_COMPLEX	12	0.478832	1.28794	0.144231	0.421349	1
GO_SOLUTE_SODIUM_SYMPORTER_ACTIVITY	45	0.346045	1.28767	0.10101	0.421311	1
HP_2_3_TOE_SYNDACTYLY	75	0.309145	1.28754	0.0678733	0.420972	1
GO_ORGANIC_ACID_TRANSMEMBRANE_TRANSPORTER_ACTIVITY	125	0.288641	1.28682	0.0434783	0.421814	1
HP_FATIGABLE_WEAKNESS_OF_SWALLOWING_MUSCLES	35	0.359232	1.2867	0.129964	0.421458	1
GO_FATTY_ACYL_COA_METABOLIC_PROCESS	38	0.363388	1.28648	0.110368	0.421324	1
HP_POSITIVE_ROMBERG_SIGN	11	0.516999	1.28636	0.174863	0.420973	1
HP_DIMINISHED_MOVEMENT	53	0.334273	1.2861	0.09319	0.420867	1
GO_DNA_HELICASE_COMPLEX	15	0.447443	1.28588	0.178667	0.420735	1
GO_TRANSLATION_INITIATION_FACTOR_ACTIVITY	50	0.335917	1.28523	0.111864	0.421526	1
HP_GASTROPARESIS	19	0.41917	1.28486	0.158333	0.421724	1
HP_SPASTIC_PARAPARESIS	43	0.359604	1.28471	0.121212	0.421426	1
GO_REGULATION_OF_PROTEIN_TARGETING_TO_MITOCHONDRION	43	0.353412	1.28431	0.112676	0.421701	1
GO_ALANINE_TRANSPORT	13	0.481867	1.2842	0.166247	0.421309	1
GO_LATE_ENDOSOME_MEMBRANE	131	0.287178	1.28409	0.0555556	0.420932	1
HP_HYPOCALCEMIA	56	0.321206	1.28313	0.0915751	0.422237	1
GO_RETINA_MORPHOGENESIS_IN_CAMERA_TYPE_EYE	48	0.337826	1.28263	0.11583	0.422666	1
HP_DELUSIONS	37	0.353435	1.2821	0.0891089	0.42317	1
GO_RETROGRADE_TRANSPORT_ENDOSOME_TO_GOLGI	88	0.308616	1.28192	0.0625	0.422926	1
HP_RECURRENT_SINUSITIS	29	0.380317	1.28138	0.120743	0.423458	1
GO_G_PROTEIN_COUPLED_CHEMOATTRACTANT_RECEPTOR_ACTIVITY	14	0.46343	1.28094	0.146277	0.423728	1
GO_MITOCHONDRION_DISTRIBUTION	16	0.444954	1.28059	0.188144	0.423868	1
HP_METHYLMALONIC_ACIDEMIA	11	0.503292	1.28057	0.172324	0.423322	1
GO_COPI_COATED_VESICLE	27	0.399793	1.27998	0.148734	0.423939	1
HP_MEGALOBLASTIC_ANEMIA	16	0.452209	1.27958	0.16095	0.424177	1
GO_INTRACELLULAR_ESTROGEN_RECEPTOR_SIGNALING_PATHWAY	53	0.336402	1.27867	0.0945455	0.425401	1
HP_HYPOCHROMIC_ANEMIA	31	0.378159	1.27866	0.141975	0.424845	1
HP_ASPIRATION_PNEUMONIA	23	0.401397	1.27858	0.153005	0.424444	1
GO_RESPONSE_TO_IMMOBILIZATION_STRESS	21	0.415952	1.27743	0.153409	0.426255	1
HP_BIRTH_LENGTH_LESS_THAN_3RD_PERCENTILE	11	0.498891	1.27715	0.164524	0.426229	1
GO_MITOCHONDRIAL_CYTOCHROME_C_OXIDASE_ASSEMBLY	21	0.413718	1.27701	0.136095	0.42593	1
GO_REGULATION_OF_DNA_TEMPLATED_TRANSCRIPTION_ELONGATION	46	0.350023	1.27615	0.125	0.427084	1
GO_GUANYL_NUCLEOTIDE_EXCHANGE_FACTOR_COMPLEX	14	0.469355	1.27454	0.193548	0.429713	1
HP_BRONCHIECTASIS	90	0.301649	1.27333	0.0752212	0.431632	1
GO_N_ACETYLTRANSFERASE_ACTIVITY	76	0.312767	1.27298	0.0748899	0.431752	1
GO_TRANSCRIPTION_PREINITIATION_COMPLEX_ASSEMBLY	36	0.364032	1.27267	0.141104	0.43178	1
GO_EXTRINSIC_COMPONENT_OF_ENDOSOME_MEMBRANE	10	0.510919	1.27247	0.189394	0.431595	1
GO_VITAMIN_B6_BINDING	43	0.343877	1.27206	0.106897	0.431835	1
GO_IRON_SULFUR_CLUSTER_ASSEMBLY	23	0.401809	1.27158	0.139818	0.432171	1
GO_RESPONSE_TO_UV_C	16	0.44711	1.27075	0.155496	0.433302	1
GO_LEFT_RIGHT_AXIS_SPECIFICATION	14	0.463656	1.27073	0.179221	0.432732	1
GO_RESPONSE_TO_STEROL_DEPLETION	17	0.445219	1.27069	0.179221	0.432227	1
HP_TOE_CLINODACTYLY	48	0.333705	1.27012	0.124161	0.43274	1
GO_RNA_POLYMERASE_CORE_ENZYME_BINDING	49	0.333047	1.27002	0.121107	0.432356	1
GO_XENOBIOTIC_TRANSPORT	28	0.383051	1.26957	0.137427	0.432703	1
HP_INTELLECTUAL_DISABILITY_PROFOUND	101	0.293231	1.26942	0.0555556	0.432413	1
GO_REGULATION_OF_CARBOHYDRATE_CATABOLIC_PROCESS	82	0.309947	1.26932	0.0696721	0.432021	1
HP_RHEUMATOID_ARTHRITIS	18	0.435718	1.26928	0.201657	0.431515	1
GO_REGULATION_OF_INTRACELLULAR_ESTROGEN_RECEPTOR_SIGNALING_PATHWAY	39	0.356047	1.26927	0.125413	0.43095	1
GO_POSITIVE_REGULATION_OF_CHROMATIN_BINDING	13	0.48328	1.26922	0.185464	0.430471	1
GO_CENTRIOLE	133	0.280199	1.26853	0.0443038	0.431308	1
GO_INCLUSION_BODY	70	0.313233	1.26796	0.0909091	0.431937	1
GO_ORGANIC_HYDROXY_COMPOUND_BIOSYNTHETIC_PROCESS	213	0.269242	1.26755	0.00900901	0.432234	1
GO_THIOESTER_METABOLIC_PROCESS	94	0.299945	1.26717	0.0812183	0.432398	1
GO_REGULATION_OF_NEURON_PROJECTION_ARBORIZATION	12	0.484773	1.26712	0.172324	0.431933	1
GO_BH_DOMAIN_BINDING	10	0.515197	1.26703	0.227941	0.431531	1
GO_ADENYL_NUCLEOTIDE_EXCHANGE_FACTOR_ACTIVITY	10	0.503054	1.26645	0.182045	0.432188	1
GO_C_C_CHEMOKINE_BINDING	13	0.456359	1.26547	0.17027	0.433615	1
GO_UBIQUITIN_DEPENDENT_PROTEIN_CATABOLIC_PROCESS_VIA_THE_MULTIVESICULAR_BODY_SORTING_PATHWAY	23	0.398426	1.26544	0.163205	0.433094	1
GO_PEPTIDE_ALPHA_N_ACETYLTRANSFERASE_ACTIVITY	10	0.500747	1.26494	0.192893	0.433627	1
GO_REGULATION_OF_TRIGLYCERIDE_BIOSYNTHETIC_PROCESS	18	0.431809	1.26429	0.167095	0.434413	1
HP_PACE_OF_PROGRESSION	408	0.248432	1.26409	0	0.434236	1
GO_O_METHYLTRANSFERASE_ACTIVITY	21	0.404139	1.26395	0.159884	0.433938	1
GO_DEMETHYLASE_ACTIVITY	37	0.359131	1.26368	0.127869	0.433952	1
GO_PEPTIDYL_LYSINE_METHYLATION	115	0.28776	1.26341	0.0558659	0.433955	1
GO_PROTEIN_LOCALIZATION_TO_NUCLEOLUS	13	0.473604	1.26213	0.181579	0.436053	1
GO_ALDEHYDE_CATABOLIC_PROCESS	10	0.511815	1.26182	0.21197	0.436103	1
GO_DNA_METHYLATION_INVOLVED_IN_GAMETE_GENERATION	14	0.461057	1.26146	0.185	0.436346	1
GO_NUCLEOTIDE_RECEPTOR_ACTIVITY	12	0.478221	1.26138	0.188776	0.435933	1
GO_HEME_METABOLIC_PROCESS	29	0.370071	1.26137	0.155015	0.435384	1
GO_TRANSCRIPTION_FACTOR_TFIID_COMPLEX	33	0.362245	1.26102	0.12037	0.435515	1
GO_AUTOPHAGOSOME_ORGANIZATION	94	0.295454	1.26063	0.0436681	0.435762	1
GO_CELL_DEATH_IN_RESPONSE_TO_HYDROGEN_PEROXIDE	26	0.386364	1.26034	0.133987	0.435789	1
GO_RNA_POLYMERASE_BINDING	65	0.314513	1.26025	0.103586	0.435435	1
GO_NON_MOTILE_CILIUM	122	0.287518	1.26004	0.0760234	0.435336	1
GO_NUCLEAR_SPECK	380	0.242424	1.26	0	0.434877	1
GO_TRANSLATION_REGULATOR_ACTIVITY_NUCLEIC_ACID_BINDING	99	0.292623	1.25854	0.097561	0.437313	1
GO_NEUROTRANSMITTER_SECRETION	145	0.272992	1.25838	0.0397727	0.437099	1
HP_ABNORMALITY_OF_THE_5TH_TOE	70	0.307967	1.2569	0.0987654	0.439684	1
GO_PHOSPHATIDYLINOSITOL_KINASE_ACTIVITY	15	0.452407	1.25684	0.182584	0.439244	1
HP_ABNORMAL_CIRCULATING_SULFUR_AMINO_ACID_CONCENTRATION	16	0.449529	1.25605	0.172515	0.440254	1
GO_ANCHORED_COMPONENT_OF_EXTERNAL_SIDE_OF_PLASMA_MEMBRANE	13	0.465938	1.256	0.167082	0.439803	1
GO_ORGANELLE_MEMBRANE_CONTACT_SITE	24	0.391476	1.25556	0.166667	0.440169	1
GO_CYTOPLASMIC_PATTERN_RECOGNITION_RECEPTOR_SIGNALING_PATHWAY	65	0.318279	1.25404	0.117155	0.442763	1
GO_CELLULAR_RESPONSE_TO_LIPOPROTEIN_PARTICLE_STIMULUS	29	0.379693	1.25403	0.158501	0.442243	1
GO_ATP_TRANSMEMBRANE_TRANSPORTER_ACTIVITY	21	0.409597	1.25374	0.170588	0.442265	1
HP_TRUE_HERMAPHRODITISM	17	0.429897	1.25339	0.201613	0.442379	1
GO_CHAPERONE_COFACTOR_DEPENDENT_PROTEIN_REFOLDING	32	0.368201	1.25319	0.178451	0.442203	1
HP_DECREASED_MINIATURE_ENDPLATE_POTENTIALS	11	0.487105	1.25319	0.215584	0.441646	1
GO_PROTEIN_LOCALIZATION_TO_PHAGOPHORE_ASSEMBLY_SITE	12	0.474993	1.25319	0.206388	0.441107	1
GO_TRANSCRIPTION_ELONGATION_FACTOR_COMPLEX	51	0.335803	1.25215	0.105058	0.442693	1
GO_REGULATION_OF_TRIGLYCERIDE_CATABOLIC_PROCESS	12	0.462615	1.25196	0.179063	0.44252	1
GO_FATTY_ACYL_COA_BIOSYNTHETIC_PROCESS	31	0.376669	1.25176	0.16129	0.442415	1
GO_MATURATION_OF_5_8S_RRNA_FROM_TRICISTRONIC_RRNA_TRANSCRIPT_SSU_RRNA_5_8S_RRNA_LSU_RRNA	25	0.384136	1.25133	0.162722	0.442772	1
HP_HYPOMIMIC_FACE	28	0.37756	1.25131	0.166181	0.442267	1
GO_NUCLEAR_EXPORT	196	0.263398	1.25066	0.0378788	0.443063	1
HP_ABNORMALITY_OF_THE_GLABELLA	10	0.493555	1.24899	0.22108	0.446019	1
GO_MITOCHONDRIAL_FUSION	27	0.379712	1.24842	0.161994	0.446635	1
HP_TRUNCAL_ATAXIA	46	0.323758	1.24842	0.151203	0.446093	1
GO_SNAP_RECEPTOR_ACTIVITY	34	0.35566	1.24821	0.175385	0.446004	1
GO_REGULATION_OF_TOR_SIGNALING	95	0.294037	1.24803	0.084507	0.445857	1
GO_TRANS_GOLGI_NETWORK_MEMBRANE	82	0.295044	1.24723	0.0995671	0.44697	1
GO_PHOSPHOLIPID_BIOSYNTHETIC_PROCESS	247	0.256452	1.24593	0	0.449135	1
GO_LONG_CHAIN_FATTY_ACID_TRANSPORTER_ACTIVITY	15	0.439443	1.2447	0.197183	0.451252	1
GO_TRANSPORT_VESICLE_MEMBRANE	177	0.264211	1.24426	0.0202703	0.45164	1
GO_PHOSPHATIDYLETHANOLAMINE_METABOLIC_PROCESS	22	0.393648	1.24408	0.176812	0.451438	1
GO_QUINONE_METABOLIC_PROCESS	31	0.368209	1.24407	0.167683	0.450903	1
GO_TETRAPYRROLE_METABOLIC_PROCESS	51	0.325587	1.24367	0.12782	0.451195	1
GO_MODIFICATION_DEPENDENT_PROTEIN_BINDING	146	0.273377	1.24292	0.0666667	0.452234	1
HP_3_METHYLGLUTACONIC_ACIDURIA	16	0.441946	1.2426	0.177966	0.452364	1
HP_PSYCHOMOTOR_RETARDATION	87	0.289154	1.24149	0.0704846	0.45411	1
GO_EXOCYTIC_PROCESS	71	0.302846	1.24139	0.112069	0.453762	1
HP_BILE_DUCT_PROLIFERATION	14	0.455503	1.24133	0.212938	0.453318	1
GO_RNA_POLYMERASE_COMPLEX	103	0.285633	1.2405	0.0840708	0.454459	1
GO_HISTONE_H3_K4_TRIMETHYLATION	17	0.429979	1.24045	0.195373	0.454016	1
GO_SOLUTE_PROTON_SYMPORTER_ACTIVITY	17	0.413738	1.24017	0.182796	0.454079	1
GO_PRESYNAPTIC_ACTIVE_ZONE_CYTOPLASMIC_COMPONENT	14	0.448247	1.2399	0.192	0.454095	1
GO_CDP_DIACYLGLYCEROL_METABOLIC_PROCESS	14	0.445956	1.23979	0.19086	0.453743	1
GO_POSITIVE_REGULATION_OF_PROTEIN_TARGETING_TO_MITOCHONDRION	31	0.360448	1.23951	0.14	0.453737	1
GO_TERMINAL_BOUTON	41	0.343	1.23896	0.158076	0.454366	1
GO_REGULATION_OF_VACUOLE_ORGANIZATION	44	0.335259	1.23886	0.142361	0.454028	1
GO_SERINE_FAMILY_AMINO_ACID_METABOLIC_PROCESS	35	0.347248	1.23861	0.127389	0.454009	1
GO_RESPONSE_TO_AMINO_ACID_STARVATION	46	0.332599	1.2381	0.158784	0.454481	1
HP_DIFFUSE_CEREBELLAR_ATROPHY	14	0.442072	1.23806	0.196517	0.454011	1
GO_PEPTIDE_LYSINE_N_ACETYLTRANSFERASE_ACTIVITY	53	0.323669	1.23805	0.10757	0.453473	1
GO_ENDORIBONUCLEASE_ACTIVITY	58	0.318553	1.23776	0.137795	0.453561	1
HP_ALBINISM	15	0.439632	1.23744	0.21608	0.453609	1
HP_ABNORMAL_BRANCHING_PATTERN_OF_THE_AORTIC_ARCH	16	0.432025	1.23725	0.206897	0.453447	1
HP_CHOLANGITIS	11	0.466828	1.23718	0.189744	0.45308	1
HP_ABNORMAL_CORPUS_STRIATUM_MORPHOLOGY	30	0.353725	1.23602	0.186047	0.455094	1
HP_NEURONAL_LOSS_IN_CENTRAL_NERVOUS_SYSTEM	34	0.356737	1.23599	0.154098	0.454607	1
GO_DYNEIN_LIGHT_INTERMEDIATE_CHAIN_BINDING	25	0.385962	1.23573	0.187683	0.454589	1
GO_PHOSPHATIDYLCHOLINE_BIOSYNTHETIC_PROCESS	38	0.343132	1.23532	0.135922	0.45495	1
GO_ACYL_COA_BINDING	24	0.384579	1.23452	0.198813	0.456138	1
GO_TELOMERE_MAINTENANCE_VIA_SEMI_CONSERVATIVE_REPLICATION	27	0.371683	1.2342	0.171512	0.456313	1
GO_INTRACELLULAR_MRNA_LOCALIZATION	12	0.475435	1.23401	0.233333	0.456155	1
GO_POSITIVE_REGULATION_OF_LYMPHOCYTE_APOPTOTIC_PROCESS	13	0.455931	1.23278	0.202899	0.45814	1
HP_ABNORMAL_EPIPHYSEAL_OSSIFICATION	50	0.322568	1.23273	0.111111	0.45773	1
GO_PHAGOPHORE_ASSEMBLY_SITE	30	0.361344	1.2327	0.163265	0.457248	1
HP_CYSTOID_MACULAR_EDEMA	12	0.468031	1.23253	0.226463	0.457001	1
HP_IRRITABILITY	132	0.276238	1.23245	0.0864865	0.456618	1
HP_HYPERKINETIC_MOVEMENTS	23	0.391794	1.23212	0.183432	0.456749	1
GO_ODORANT_BINDING	14	0.438887	1.23197	0.223404	0.456546	1
HP_NEURODEGENERATION	72	0.299998	1.23091	0.124464	0.458159	1
GO_N_ACYLTRANSFERASE_ACTIVITY	87	0.293656	1.23028	0.104265	0.458988	1
HP_NYCTALOPIA	148	0.266823	1.23004	0.0662651	0.458932	1
GO_RNA_SPLICING_VIA_TRANSESTERIFICATION_REACTIONS	350	0.243269	1.22983	0.0333333	0.458799	1
HP_SPASTIC_DIPLEGIA	27	0.380443	1.22947	0.166154	0.459052	1
GO_NEUTRAL_LIPID_CATABOLIC_PROCESS	35	0.34687	1.22945	0.153605	0.458562	1
GO_GAMMA_TUBULIN_BINDING	28	0.381435	1.22936	0.193732	0.45821	1
GO_VESICLE_TETHERING_COMPLEX	67	0.30328	1.2281	0.126482	0.460292	1
GO_TRANSLATION_REGULATOR_ACTIVITY	126	0.276095	1.22808	0.0860215	0.459787	1
GO_CELL_DEATH_IN_RESPONSE_TO_OXIDATIVE_STRESS	81	0.291706	1.22792	0.129464	0.459588	1
GO_MICROTUBULE_ANCHORING	23	0.395911	1.22738	0.186813	0.460158	1
HP_PARONYCHIA	10	0.489092	1.22715	0.208122	0.460099	1
GO_MITOPHAGY	25	0.387679	1.22672	0.187861	0.460474	1
GO_NUCLEOLAR_LARGE_RRNA_TRANSCRIPTION_BY_RNA_POLYMERASE_I	14	0.445776	1.22659	0.224747	0.460232	1
HP_DECREASED_ABSENT_ANKLE_REFLEXES	24	0.380131	1.22623	0.167164	0.460441	1
GO_LIPID_IMPORT_INTO_CELL	16	0.428047	1.22547	0.213333	0.461488	1
GO_SECONDARY_ACTIVE_TRANSMEMBRANE_TRANSPORTER_ACTIVITY	181	0.257132	1.22495	0.0338983	0.462036	1
GO_REGULATION_OF_MITOCHONDRIAL_FUSION	13	0.453807	1.22463	0.234694	0.462176	1
GO_NEGATIVE_REGULATION_OF_AUTOPHAGOSOME_ASSEMBLY	13	0.444437	1.22389	0.191214	0.463215	1
GO_AUTOPHAGOSOME_MEMBRANE	36	0.335521	1.22385	0.169611	0.462767	1
GO_CAMP_RESPONSE_ELEMENT_BINDING	13	0.459198	1.22351	0.203125	0.462957	1
HP_CORONAL_CLEFT_VERTEBRAE	11	0.47793	1.22341	0.230958	0.462632	1
HP_MACULAR_THICKENING	19	0.407622	1.22301	0.184524	0.462944	1
GO_LYSINE_METABOLIC_PROCESS	13	0.447786	1.22293	0.23545	0.462579	1
GO_RESPONSE_TO_NITROSATIVE_STRESS	10	0.487238	1.22235	0.216545	0.463222	1
HP_GASTROESOPHAGEAL_REFLUX	258	0.249292	1.22212	0.00909091	0.46316	1
GO_CEREBELLAR_PURKINJE_CELL_LAYER_DEVELOPMENT	23	0.397732	1.22193	0.169231	0.46308	1
HP_ABNORMAL_MITOCHONDRIAL_MORPHOLOGY	17	0.425289	1.22168	0.204787	0.463099	1
HP_ABNORMAL_CAUDATE_NUCLEUS_MORPHOLOGY	17	0.41441	1.22146	0.220109	0.462965	1
GO_VITAMIN_METABOLIC_PROCESS	102	0.278505	1.22129	0.10101	0.46276	1
GO_HISTONE_H4_K16_ACETYLATION	21	0.405386	1.22128	0.201754	0.46225	1
GO_PTERIDINE_CONTAINING_COMPOUND_METABOLIC_PROCESS	31	0.361166	1.22088	0.175227	0.462534	1
HP_SLURRED_SPEECH	32	0.349328	1.22055	0.191083	0.462701	1
HP_DIABETES_INSIPIDUS	33	0.360509	1.2205	0.182724	0.462285	1
HP_PROGRESSIVE	249	0.248908	1.22026	0.0444444	0.462242	1
GO_CYTOPLASMIC_REGION	228	0.25391	1.22023	0.038835	0.46179	1
GO_ALPHA_LINOLENIC_ACID_METABOLIC_PROCESS	13	0.450509	1.22012	0.234211	0.461502	1
GO_PHOSPHATIDYLINOSITOL_4_5_BISPHOSPHATE_PHOSPHATASE_ACTIVITY	13	0.448502	1.22004	0.239295	0.461146	1
HP_UNSTEADY_GAIT	119	0.267998	1.21946	0.0621469	0.461842	1
GO_HISTONE_H3_K9_TRIMETHYLATION	16	0.42682	1.21892	0.216066	0.462482	1
GO_PHOSPHATIDYLETHANOLAMINE_BIOSYNTHETIC_PROCESS	15	0.438665	1.2179	0.214834	0.46416	1
GO_DOSAGE_COMPENSATION	16	0.430861	1.21756	0.209632	0.464357	1
GO_VITAMIN_BIOSYNTHETIC_PROCESS	17	0.41184	1.21755	0.205128	0.463849	1
GO_SYMPORTER_ACTIVITY	104	0.276044	1.21672	0.106599	0.465136	1
GO_CELLULAR_RESPONSE_TO_OXIDISED_LOW_DENSITY_LIPOPROTEIN_PARTICLE_STIMULUS	10	0.493285	1.21616	0.232779	0.465863	1
GO_U2_SNRNP	22	0.388843	1.21589	0.208211	0.465909	1
GO_PROLINE_TRANSPORT	10	0.477857	1.21441	0.208122	0.468492	1
GO_THIOESTER_BIOSYNTHETIC_PROCESS	51	0.319721	1.2142	0.162055	0.468396	1
GO_DE_NOVO_PROTEIN_FOLDING	41	0.330752	1.21414	0.177049	0.467986	1
HP_DYSGRAPHIA	41	0.33132	1.21395	0.166667	0.467819	1
HP_RIGHT_AORTIC_ARCH	13	0.462507	1.21373	0.224439	0.467771	1
GO_MATURATION_OF_SSU_RRNA	51	0.320287	1.21355	0.184028	0.467701	1
GO_ENDOPLASMIC_RETICULUM_TUBULAR_NETWORK	22	0.385407	1.21184	0.216763	0.470764	1
HP_HYPERPHOSPHATEMIA	16	0.427741	1.21008	0.227749	0.474026	1
GO_EXODEOXYRIBONUCLEASE_ACTIVITY	20	0.393689	1.20988	0.224432	0.473931	1
HP_LOBAR_HOLOPROSENCEPHALY	17	0.408317	1.20889	0.234783	0.475601	1
GO_ORGANIC_ACID_CATABOLIC_PROCESS	248	0.248424	1.20886	0.0294118	0.475141	1
GO_VACUOLAR_PROTON_TRANSPORTING_V_TYPE_ATPASE_COMPLEX	17	0.413843	1.20862	0.212987	0.475143	1
HP_DELAYED_SPEECH_AND_LANGUAGE_DEVELOPMENT	652	0.224779	1.20856	0	0.474731	1
HP_CEREBRAL_INCLUSION_BODIES	40	0.334691	1.20853	0.149068	0.474272	1
HP_SHYNESS	10	0.482218	1.20832	0.239691	0.474212	1
HP_ABNORMALITY_OF_THE_THORACIC_CAVITY	33	0.342518	1.20666	0.200599	0.477199	1
GO_POSITIVE_REGULATION_OF_PROTEIN_LOCALIZATION_TO_CELL_SURFACE	16	0.418123	1.2063	0.219577	0.477399	1
HP_ABNORMALITY_OF_THE_LABIA_MAJORA	36	0.348669	1.20577	0.199324	0.477965	1
GO_NEGATIVE_REGULATION_OF_CELLULAR_CATABOLIC_PROCESS	234	0.249359	1.20409	0.0606061	0.481087	1
GO_POSITIVE_REGULATION_OF_DNA_TEMPLATED_TRANSCRIPTION_INITIATION	37	0.337962	1.20372	0.18123	0.481399	1
GO_NEGATIVE_REGULATION_OF_CATABOLIC_PROCESS	285	0.244566	1.20365	0.0119048	0.481049	1
HP_ATRESIA_OF_THE_EXTERNAL_AUDITORY_CANAL	41	0.326719	1.20326	0.188153	0.481361	1
GO_CILIUM	535	0.227483	1.20262	0	0.48224	1
GO_REGULATION_OF_PLASMA_LIPOPROTEIN_PARTICLE_LEVELS	71	0.290036	1.20246	0.135965	0.482041	1
GO_OTIC_VESICLE_DEVELOPMENT	12	0.464357	1.20217	0.240896	0.482186	1
GO_PEPTIDYL_LYSINE_ACETYLATION	159	0.263646	1.20125	0.056962	0.483616	1
GO_NEGATIVE_REGULATION_OF_CILIUM_ASSEMBLY	10	0.47624	1.2012	0.26699	0.483187	1
HP_ANHIDROSIS	20	0.393435	1.20098	0.219577	0.483172	1
HP_HYPOTELORISM	84	0.290475	1.20084	0.123404	0.482952	1
GO_LIPOPROTEIN_CATABOLIC_PROCESS	14	0.429045	1.19986	0.232432	0.484567	1
GO_PORE_COMPLEX	20	0.401398	1.19949	0.219653	0.484814	1
GO_POSITIVE_REGULATION_OF_CILIUM_ASSEMBLY	21	0.389557	1.19881	0.214502	0.485708	1
GO_INTRINSIC_COMPONENT_OF_MITOCHONDRIAL_INNER_MEMBRANE	48	0.313244	1.19874	0.181467	0.485339	1
HP_EPILEPTIC_ENCEPHALOPATHY	87	0.281553	1.19832	0.102564	0.485695	1
HP_SPASTIC_GAIT	58	0.303696	1.19831	0.142857	0.485201	1
GO_POSITIVE_REGULATION_OF_RESPONSE_TO_ENDOPLASMIC_RETICULUM_STRESS	35	0.333865	1.19737	0.188742	0.486724	1
HP_AUTOAMPUTATION	12	0.450856	1.19717	0.239609	0.48661	1
GO_REGULATION_OF_STEROID_BIOSYNTHETIC_PROCESS	79	0.283309	1.19663	0.144105	0.487291	1
HP_ENLARGED_CISTERNA_MAGNA	16	0.421979	1.19636	0.242188	0.487345	1
GO_COHESIN_COMPLEX	15	0.430189	1.19624	0.245333	0.487065	1
GO_NUCLEOBASE_CONTAINING_COMPOUND_TRANSMEMBRANE_TRANSPORTER_ACTIVITY	47	0.325872	1.19607	0.180887	0.486923	1
GO_PIGMENT_GRANULE_MATURATION	10	0.484434	1.19605	0.251219	0.486458	1
GO_PHOSPHATASE_ACTIVITY	247	0.24844	1.19536	0.046729	0.487466	1
GO_PURINERGIC_NUCLEOTIDE_RECEPTOR_SIGNALING_PATHWAY	22	0.379046	1.19536	0.22063	0.486945	1
GO_REGULATION_OF_STEROID_METABOLIC_PROCESS	107	0.275052	1.1953	0.115152	0.48657	1
GO_ASPARTATE_FAMILY_AMINO_ACID_CATABOLIC_PROCESS	21	0.384745	1.19528	0.207101	0.486103	1
GO_S_ADENOSYLMETHIONINE_METABOLIC_PROCESS	15	0.426567	1.19499	0.254144	0.486222	1
GO_PROTEIN_METHYLTRANSFERASE_ACTIVITY	82	0.284891	1.19408	0.155102	0.487668	1
HP_DYSMETRIA	120	0.270396	1.19367	0.107955	0.488035	1
GO_POSITIVE_REGULATION_OF_HISTONE_H3_K9_METHYLATION	10	0.470636	1.19361	0.25	0.487671	1
GO_RAB_GUANYL_NUCLEOTIDE_EXCHANGE_FACTOR_ACTIVITY	32	0.345804	1.19346	0.193146	0.487468	1
GO_REGULATION_OF_ENDOPLASMIC_RETICULUM_UNFOLDED_PROTEIN_RESPONSE	28	0.359853	1.19295	0.217523	0.488064	1
HP_MOOD_SWINGS	10	0.477079	1.19229	0.231121	0.489034	1
GO_MITOCHONDRIAL_GENOME_MAINTENANCE	22	0.376532	1.19129	0.21229	0.490693	1
HP_HYPOPLASIA_OF_TEETH	72	0.290218	1.19128	0.136929	0.490196	1
HP_ABNORMALITY_OF_THE_PARANASAL_SINUSES	107	0.271904	1.19121	0.156757	0.489822	1
GO_RESPONSE_TO_ANTIBIOTIC	43	0.325953	1.19083	0.204013	0.490076	1
HP_SHORT_CHIN	33	0.349672	1.19008	0.214502	0.491186	1
GO_CILIARY_BASAL_BODY_PLASMA_MEMBRANE_DOCKING	94	0.276564	1.19002	0.138756	0.490784	1
GO_CYTOSOLIC_TRANSPORT	159	0.256156	1.18989	0.0680272	0.490544	1
GO_REGULATION_OF_PROTEIN_POLYUBIQUITINATION	23	0.377092	1.18952	0.23839	0.490826	1
GO_BASAL_TRANSCRIPTION_MACHINERY_BINDING	59	0.304914	1.18911	0.177165	0.491244	1
GO_STEREOCILIUM_TIP	17	0.397995	1.18874	0.228495	0.491554	1
GO_DNA_REPLICATION_FACTOR_A_COMPLEX	14	0.436276	1.18859	0.232558	0.49135	1
HP_TYPE_2_MUSCLE_FIBER_ATROPHY	11	0.465794	1.18767	0.262755	0.49283	1
GO_V_D_J_RECOMBINATION	13	0.438636	1.18723	0.272727	0.493251	1
GO_ACETYLTRANSFERASE_ACTIVITY	96	0.273712	1.18694	0.142202	0.493397	1
HP_ABNORMALITY_OF_THE_EXTRINSIC_PATHWAY	14	0.421389	1.18683	0.243038	0.493107	1
GO_CYTOPLASMIC_MICROTUBULE	76	0.285981	1.18683	0.159091	0.492608	1
HP_MOTOR_NEURON_ATROPHY	55	0.298336	1.18678	0.146245	0.49217	1
GO_NEGATIVE_REGULATION_OF_RESPONSE_TO_EXTRACELLULAR_STIMULUS	11	0.46183	1.18672	0.265985	0.491787	1
GO_ASPARTATE_FAMILY_AMINO_ACID_METABOLIC_PROCESS	44	0.322132	1.18542	0.198582	0.494193	1
GO_HISTONE_MRNA_CATABOLIC_PROCESS	12	0.446963	1.18413	0.26988	0.496541	1
GO_FATTY_ACID_METABOLIC_PROCESS	330	0.238017	1.18412	0.0149254	0.496046	1
GO_POSITIVE_REGULATION_OF_MAST_CELL_ACTIVATION	16	0.40368	1.18345	0.241935	0.496995	1
GO_RIBOSOMAL_LARGE_SUBUNIT_ASSEMBLY	30	0.352599	1.18287	0.180952	0.497771	1
GO_RNA_SPLICING	437	0.227629	1.18244	0	0.498233	1
GO_PHOTORECEPTOR_CONNECTING_CILIUM	33	0.349683	1.18237	0.192308	0.497861	1
GO_GOLGI_RIBBON_FORMATION	14	0.434079	1.18189	0.268698	0.498341	1
GO_REGULATION_OF_ER_TO_GOLGI_VESICLE_MEDIATED_TRANSPORT	16	0.401463	1.18154	0.239362	0.498561	1
GO_SAGA_COMPLEX	11	0.461671	1.18129	0.260766	0.498596	1
HP_RESTLESSNESS	102	0.273342	1.18097	0.140541	0.498802	1
GO_TERMINATION_OF_RNA_POLYMERASE_II_TRANSCRIPTION	35	0.336893	1.18054	0.206294	0.49924	1
HP_HYPOPLASIA_OF_THE_FRONTAL_LOBES	29	0.350663	1.18023	0.228395	0.499419	1
GO_SYNAPTIC_VESICLE_EXOCYTOSIS	99	0.279021	1.18021	0.161458	0.498951	1
GO_PHOSPHOPROTEIN_PHOSPHATASE_ACTIVITY	162	0.245512	1.18001	0.0909091	0.498882	1
HP_CONGENITAL_STATIONARY_NIGHT_BLINDNESS	13	0.436972	1.17976	0.243243	0.498888	1
GO_TRNA_CATABOLIC_PROCESS	11	0.451881	1.17964	0.267677	0.498687	1
HP_DISINHIBITION	144	0.252959	1.1796	0.0948905	0.498251	1
GO_RESPONSE_TO_ISCHEMIA	48	0.312353	1.17935	0.166023	0.498292	1
HP_METAPHYSEAL_IRREGULARITY	41	0.320376	1.17868	0.214511	0.499256	1
HP_RETINAL_COLOBOMA	24	0.373298	1.17866	0.217765	0.498798	1
GO_LIPID_OXIDATION	99	0.272209	1.17833	0.149485	0.499015	1
GO_9PLUS0_NON_MOTILE_CILIUM	101	0.270852	1.17807	0.156398	0.499069	1
HP_ABNORMALITY_OF_THE_PERITONEUM	24	0.360634	1.178	0.215569	0.498707	1
HP_INVERTED_NIPPLES	24	0.368393	1.17791	0.227414	0.498395	1
GO_MULTICELLULAR_ORGANISM_AGING	28	0.35389	1.17764	0.216561	0.498525	1
GO_POSITIVE_REGULATION_OF_LIPID_STORAGE	21	0.377078	1.17727	0.237705	0.498818	1
HP_THICKENED_NUCHAL_SKIN_FOLD	53	0.301831	1.17721	0.207692	0.498453	1
GO_RNA_CAPPING	34	0.328437	1.17641	0.223975	0.499711	1
HP_GENERALIZED_HYPOTONIA	875	0.227889	1.1764	0	0.499216	1
GO_REGULATION_OF_ACROSOME_REACTION	11	0.452735	1.17581	0.278049	0.500036	1
HP_TRICEPS_WEAKNESS	15	0.419361	1.17518	0.277311	0.500941	1
GO_METHIONINE_BIOSYNTHETIC_PROCESS	11	0.453254	1.17513	0.264103	0.500555	1
GO_ACYLGLYCEROL_O_ACYLTRANSFERASE_ACTIVITY	21	0.374531	1.17493	0.232143	0.50051	1
GO_ORGAN_OR_TISSUE_SPECIFIC_IMMUNE_RESPONSE	13	0.43201	1.17488	0.239892	0.50013	1
GO_RACEMASE_AND_EPIMERASE_ACTIVITY	16	0.400224	1.17478	0.230978	0.499841	1
GO_REGULATION_OF_HISTONE_METHYLATION	59	0.296666	1.17474	0.176245	0.499449	1
GO_HISTONE_METHYLATION	125	0.260179	1.17368	0.126506	0.501195	1
GO_MONOCARBOXYLIC_ACID_TRANSMEMBRANE_TRANSPORTER_ACTIVITY	45	0.309084	1.17346	0.182879	0.501231	1
GO_ESTABLISHMENT_OF_BLOOD_BRAIN_BARRIER	11	0.45799	1.17346	0.27154	0.500735	1
GO_PROTEIN_MATURATION_BY_IRON_SULFUR_CLUSTER_TRANSFER	15	0.417642	1.17338	0.261333	0.500417	1
GO_MOTILE_CILIUM	144	0.25643	1.17295	0.110429	0.50088	1
GO_POSITIVE_REGULATION_OF_TRANSCRIPTION_FROM_RNA_POLYMERASE_II_PROMOTER_IN_RESPONSE_TO_STRESS	22	0.372917	1.17292	0.2493	0.500432	1
HP_SLOW_PROGRESSION	147	0.25733	1.17254	0.108108	0.500769	1
GO_OUTER_MEMBRANE	198	0.246518	1.17016	0.088	0.505504	1
HP_DEGENERATION_OF_THE_LATERAL_CORTICOSPINAL_TRACTS	20	0.385543	1.16968	0.272727	0.506068	1
HP_GLOBAL_BRAIN_ATROPHY	46	0.311082	1.1696	0.230189	0.505738	1
HP_DELAYED_EPIPHYSEAL_OSSIFICATION	16	0.399385	1.16883	0.268817	0.506953	1
HP_ENLARGED_EPIPHYSES	11	0.42769	1.16813	0.26817	0.508007	1
HP_HYPOPLASIA_OF_DENTAL_ENAMEL	54	0.308457	1.16807	0.205128	0.507621	1
GO_ADIPOSE_TISSUE_DEVELOPMENT	39	0.325625	1.16756	0.183333	0.508242	1
GO_CILIARY_ROOTLET	11	0.453599	1.1675	0.295337	0.507883	1
GO_REGULATION_OF_WATER_LOSS_VIA_SKIN	21	0.381145	1.16704	0.232295	0.508435	1
GO_REGULATION_OF_SEQUESTERING_OF_TRIGLYCERIDE	12	0.445159	1.16688	0.278894	0.50829	1
GO_DNA_REPLICATION_ORIGIN_BINDING	23	0.365916	1.1668	0.21345	0.507954	1
GO_METHIONINE_METABOLIC_PROCESS	14	0.409548	1.1667	0.254794	0.507669	1
GO_ENDOPLASMIC_RETICULUM_GOLGI_INTERMEDIATE_COMPARTMENT	120	0.263608	1.16521	0.154762	0.510484	1
GO_N_METHYLTRANSFERASE_ACTIVITY	92	0.277595	1.16476	0.155779	0.510965	1
GO_NEGATIVE_REGULATION_OF_MYELOID_CELL_APOPTOTIC_PROCESS	12	0.438626	1.16441	0.293447	0.511233	1
GO_PROTEIN_METHYLATION	160	0.253843	1.16393	0.159722	0.511791	1
GO_VASCULAR_TRANSPORT	11	0.444281	1.1639	0.277078	0.511355	1
GO_CELLULAR_RESPONSE_TO_COLD	10	0.46348	1.16369	0.288462	0.511352	1
HP_SHUFFLING_GAIT	32	0.335291	1.16283	0.22093	0.512769	1
GO_NUCLEAR_LOCALIZATION_SEQUENCE_BINDING	23	0.371938	1.16237	0.237389	0.51334	1
GO_DYNEIN_COMPLEX	48	0.308652	1.1623	0.220974	0.51299	1
HP_NONPROGRESSIVE	21	0.385672	1.16155	0.268817	0.514172	1
GO_TFIID_CLASS_TRANSCRIPTION_FACTOR_COMPLEX_BINDING	10	0.443801	1.16111	0.260101	0.514657	1
HP_EMG_IMPAIRED_NEUROMUSCULAR_TRANSMISSION	28	0.350641	1.16094	0.25	0.514516	1
GO_CARBOHYDRATE_KINASE_ACTIVITY	21	0.370437	1.16089	0.248603	0.514132	1
HP_PARAKERATOSIS	17	0.398339	1.16085	0.260388	0.513722	1
GO_PROTEIN_DEMANNOSYLATION	19	0.396178	1.16074	0.281167	0.513478	1
GO_CIS_REGULATORY_REGION_SEQUENCE_SPECIFIC_DNA_BINDING	961	0.212581	1.16047	0	0.513597	1
HP_ABNORMAL_FULL_FIELD_ELECTRORETINOGRAM	30	0.338637	1.1602	0.23511	0.513706	1
HP_DIALEPTIC_SEIZURE	129	0.254873	1.15962	0.136364	0.514542	1
GO_REGULATION_OF_CELL_MATURATION	21	0.375545	1.15944	0.244792	0.514439	1
GO_CO_SMAD_BINDING	12	0.433633	1.15942	0.27321	0.514002	1
GO_NEGATIVE_REGULATION_OF_TUMOR_NECROSIS_FACTOR_SUPERFAMILY_CYTOKINE_PRODUCTION	50	0.300044	1.15905	0.218254	0.51435	1
HP_KETOSIS	42	0.314673	1.15886	0.221453	0.514259	1
GO_RESPONSE_TO_DIETARY_EXCESS	19	0.386351	1.15786	0.228412	0.515996	1
HP_HYPOPLASTIC_VERTEBRAL_BODIES	16	0.407291	1.1574	0.282722	0.516529	1
HP_ABNORMALITY_OF_THE_PERIVENTRICULAR_WHITE_MATTER	74	0.276617	1.15721	0.192825	0.516425	1
GO_ALPHA_BETA_T_CELL_PROLIFERATION	31	0.340553	1.15648	0.238853	0.517567	1
GO_INTRINSIC_COMPONENT_OF_ORGANELLE_MEMBRANE	370	0.230203	1.15648	0.0555556	0.517074	1
GO_PEPTIDYL_LYSINE_MODIFICATION	365	0.227969	1.15638	0.0655738	0.516789	1
GO_PROTEIN_LOCALIZATION_TO_PRESYNAPSE	10	0.456546	1.15604	0.295673	0.517057	1
HP_VERTEBRAL_CLEFTING	23	0.371909	1.15579	0.278237	0.51715	1
HP_OLIGODONTIA	42	0.310908	1.15487	0.222603	0.518778	1
GO_CILIARY_BASAL_BODY	141	0.244267	1.15396	0.146067	0.520246	1
HP_DYSOSTOSIS_MULTIPLEX	20	0.381146	1.15302	0.262032	0.521857	1
GO_MANCHETTE	11	0.447389	1.1524	0.283208	0.522733	1
HP_ABNORMAL_NEURON_MORPHOLOGY	70	0.287233	1.15238	0.20155	0.522308	1
GO_DNA_UNWINDING_INVOLVED_IN_DNA_REPLICATION	16	0.398528	1.15228	0.285714	0.522055	1
GO_MANNOSIDASE_ACTIVITY	15	0.407134	1.15226	0.282609	0.521601	1
HP_ABNORMAL_ORAL_PHYSIOLOGY	212	0.239362	1.15217	0.112069	0.521274	1
HP_WIDELY_PATENT_FONTANELLES_AND_SUTURES	15	0.421962	1.15203	0.264151	0.521111	1
GO_PLASMA_MEMBRANE_BOUNDED_CELL_PROJECTION_CYTOPLASM	188	0.248483	1.15123	0.117647	0.52246	1
GO_RRNA_PSEUDOURIDINE_SYNTHESIS	10	0.461253	1.15109	0.274648	0.522304	1
GO_POSITIVE_REGULATION_OF_VIRAL_TRANSCRIPTION	41	0.322353	1.15057	0.232639	0.522968	1
GO_ENDORIBONUCLEASE_COMPLEX	29	0.342089	1.15054	0.234323	0.522562	1
HP_LIMB_HYPERTONIA	85	0.276101	1.15001	0.172093	0.52331	1
GO_AUTOPHAGOSOME	95	0.271115	1.1498	0.157895	0.523271	1
GO_TOR_SIGNALING	117	0.265308	1.1493	0.164103	0.523914	1
GO_POSITIVE_REGULATION_OF_FATTY_ACID_METABOLIC_PROCESS	29	0.344973	1.14927	0.251515	0.523501	1
GO_LIPID_HOMEOSTASIS	123	0.257936	1.14891	0.145161	0.523827	1
GO_POSITIVE_REGULATION_OF_ALPHA_BETA_T_CELL_PROLIFERATION	18	0.386292	1.14864	0.263852	0.523963	1
GO_PROTON_TRANSPORTING_V_TYPE_ATPASE_V0_DOMAIN	10	0.464177	1.14854	0.28777	0.523667	1
GO_TRANSCYTOSIS	18	0.383878	1.14765	0.294444	0.525112	1
GO_TRANS_GOLGI_NETWORK	220	0.23653	1.14716	0.0849057	0.525779	1
GO_INTRACILIARY_TRANSPORT_INVOLVED_IN_CILIUM_ASSEMBLY	40	0.307162	1.14619	0.232877	0.527452	1
HP_WEAKNESS_OF_LONG_FINGER_EXTENSOR_MUSCLES	17	0.392457	1.14604	0.292135	0.527316	1
GO_PIGMENT_BIOSYNTHETIC_PROCESS	51	0.295805	1.14597	0.218623	0.526999	1
GO_K63_LINKED_POLYUBIQUITIN_MODIFICATION_DEPENDENT_PROTEIN_BINDING	21	0.372454	1.14594	0.26087	0.526567	1
HP_GRAY_MATTER_HETEROTOPIA	83	0.272812	1.14535	0.190698	0.527434	1
HP_HYPOPHOSPHATEMIA	35	0.32039	1.14512	0.262537	0.527428	1
GO_HISTONE_H3_K36_DEMETHYLATION	10	0.456451	1.14492	0.282238	0.527392	1
GO_UBIQUITIN_LIKE_PROTEIN_SPECIFIC_PROTEASE_ACTIVITY	18	0.392588	1.14455	0.275676	0.527751	1
HP_BRONCHITIS	67	0.284335	1.14391	0.195219	0.5287	1
GO_C2H2_ZINC_FINGER_DOMAIN_BINDING	14	0.409248	1.14344	0.304124	0.529262	1
HP_ABNORMALITY_OF_SALIVATION	137	0.250539	1.14286	0.149701	0.530109	1
HP_DRY_SKIN	121	0.256302	1.14225	0.177515	0.531062	1
GO_FATTY_ACID_SYNTHASE_ACTIVITY	11	0.443867	1.14204	0.293233	0.53104	1
GO_NEGATIVE_REGULATION_OF_HISTONE_MODIFICATION	38	0.323627	1.14123	0.240385	0.532396	1
GO_REGULATION_OF_PERK_MEDIATED_UNFOLDED_PROTEIN_RESPONSE	10	0.454988	1.14116	0.306905	0.532061	1
GO_AMINO_ACID_TRANSMEMBRANE_TRANSPORTER_ACTIVITY	62	0.283328	1.14103	0.215613	0.531875	1
GO_NUCLEOSIDE_BISPHOSPHATE_METABOLIC_PROCESS	123	0.255644	1.1408	0.134831	0.531918	1
HP_ABNORMALITY_OF_SOMATOSENSORY_EVOKED_POTENTIALS	11	0.436951	1.14024	0.295918	0.532764	1
GO_PYRUVATE_METABOLIC_PROCESS	138	0.246842	1.14007	0.156627	0.532686	1
GO_NADPH_REGENERATION	17	0.387046	1.13988	0.29023	0.532622	1
GO_CHLORIDE_ION_BINDING	11	0.436469	1.13983	0.302267	0.532247	1
GO_NUCLEOCYTOPLASMIC_CARRIER_ACTIVITY	29	0.336167	1.13927	0.254545	0.533052	1
HP_SKIN_APPENDAGE_NEOPLASM	11	0.442673	1.13923	0.286096	0.532661	1
HP_ABNORMALITY_ON_PULMONARY_FUNCTION_TESTING	78	0.274486	1.13783	0.222222	0.535357	1
HP_RENAL_TUBULAR_ATROPHY	15	0.411349	1.13775	0.299252	0.535048	1
GO_ENDOPLASMIC_RETICULUM_MANNOSE_TRIMMING	15	0.4057	1.13763	0.288714	0.534838	1
GO_AUTOPHAGY_OF_MITOCHONDRION	78	0.273633	1.13758	0.228216	0.53446	1
HP_PATELLAR_APLASIA	14	0.413842	1.1371	0.319672	0.535006	1
GO_REGULATION_OF_LIPID_CATABOLIC_PROCESS	49	0.299587	1.13642	0.237931	0.536085	1
GO_ESTROGEN_RECEPTOR_BINDING	41	0.309712	1.1364	0.251773	0.535637	1
GO_AXO_DENDRITIC_PROTEIN_TRANSPORT	13	0.42789	1.13611	0.321782	0.535802	1
GO_LIPID_DIGESTION	15	0.412061	1.13594	0.284987	0.535676	1
HP_CYSTIC_LIVER_DISEASE	33	0.330296	1.13568	0.250847	0.535787	1
HP_ABNORMAL_BRONCHUS_MORPHOLOGY	110	0.257459	1.13565	0.206704	0.535378	1
HP_DIFFICULTY_STANDING	13	0.423363	1.13506	0.280654	0.536231	1
HP_HYPERHOMOCYSTINEMIA	10	0.454243	1.13488	0.289044	0.536207	1
GO_HISTONE_H3_K14_ACETYLATION	14	0.40967	1.13481	0.310526	0.535882	1
GO_AXONAL_GROWTH_CONE	29	0.341541	1.1347	0.273256	0.535631	1
GO_POST_GOLGI_VESICLE_MEDIATED_TRANSPORT	100	0.260473	1.13449	0.225641	0.535622	1
HP_ABNORMAL_VISUAL_ELECTROPHYSIOLOGY	184	0.237804	1.13363	0.152542	0.537117	1
GO_TRANSFERASE_ACTIVITY_TRANSFERRING_NITROGENOUS_GROUPS	20	0.364584	1.13362	0.278237	0.536635	1
GO_CELLULAR_RESPONSE_TO_PH	19	0.375696	1.13301	0.282282	0.537599	1
GO_REGULATION_OF_LEUKOCYTE_DEGRANULATION	37	0.317847	1.13267	0.261905	0.537901	1
HP_HYPOPIGMENTATION_OF_THE_FUNDUS	16	0.396759	1.13223	0.290237	0.538442	1
HP_ANGINA_PECTORIS	29	0.34305	1.13177	0.253125	0.53904	1
GO_LATE_ENDOSOME_TO_VACUOLE_TRANSPORT	24	0.360365	1.1301	0.279874	0.542393	1
GO_PROTEIN_DISULFIDE_OXIDOREDUCTASE_ACTIVITY	20	0.370483	1.12986	0.297994	0.542456	1
GO_HEART_FIELD_SPECIFICATION	15	0.395732	1.12944	0.286908	0.542938	1
GO_NUCLEAR_INNER_MEMBRANE	54	0.289079	1.12848	0.227273	0.544632	1
GO_CYTOPLASMIC_EXOSOME_RNASE_COMPLEX	14	0.395548	1.12817	0.319783	0.544939	1
GO_HISTONE_DEMETHYLASE_ACTIVITY_H3_K36_SPECIFIC	10	0.456451	1.12811	0.286058	0.544592	1
GO_PROTEIN_LOCALIZATION_TO_ENDOPLASMIC_RETICULUM	145	0.245938	1.1277	0.147436	0.545045	1
HP_ANIRIDIA	41	0.305381	1.1274	0.267974	0.545268	1
GO_ENDONUCLEASE_ACTIVITY	108	0.260863	1.12736	0.204301	0.544889	1
HP_LIPID_ACCUMULATION_IN_HEPATOCYTES	107	0.258336	1.12707	0.175	0.545057	1
GO_PROTEIN_ACYLATION	226	0.232469	1.1259	0.108911	0.547226	1
GO_SYNAPTIC_VESICLE_MEMBRANE	86	0.268525	1.1253	0.218107	0.548131	1
GO_CELL_REDOX_HOMEOSTASIS	54	0.295998	1.12524	0.260073	0.547789	1
GO_ATPASE_REGULATOR_ACTIVITY	39	0.316649	1.12495	0.273616	0.547996	1
HP_ACANTHOSIS_NIGRICANS	35	0.320654	1.12464	0.279365	0.548219	1
GO_VIRAL_TRANSLATION	14	0.392921	1.12418	0.317204	0.548767	1
GO_RESPONSE_TO_MITOCHONDRIAL_DEPOLARISATION	21	0.364833	1.12388	0.289773	0.549005	1
HP_CEREBELLAR_VERMIS_ATROPHY	23	0.35904	1.12367	0.274788	0.549041	1
GO_CARBOXY_LYASE_ACTIVITY	29	0.336873	1.12312	0.27193	0.549899	1
GO_POLYOL_BIOSYNTHETIC_PROCESS	53	0.293624	1.12298	0.253731	0.549697	1
HP_ATROPHY_DEGENERATION_AFFECTING_THE_CENTRAL_NERVOUS_SYSTEM	661	0.208186	1.12206	0.0666667	0.551404	1
HP_GENERALIZED_NON_MOTOR_ABSENCE_SEIZURE	102	0.257648	1.12195	0.212871	0.551186	1
GO_NUCLEIC_ACID_PHOSPHODIESTER_BOND_HYDROLYSIS	282	0.222492	1.12175	0.117021	0.551164	1
GO_INTRACELLULAR_RECEPTOR_SIGNALING_PATHWAY	243	0.22842	1.12029	0.102041	0.554113	1
GO_REGULATION_OF_MRNA_PROCESSING	138	0.244576	1.1201	0.190476	0.55407	1
GO_PHAGOSOME_MATURATION	45	0.297656	1.11967	0.257525	0.554592	1
HP_OTITIS_MEDIA	194	0.23664	1.11962	0.160305	0.554222	1
HP_OSTEOMALACIA	18	0.373984	1.11954	0.283333	0.553917	1
HP_PELVIC_GIRDLE_MUSCLE_WEAKNESS	29	0.332937	1.11944	0.285714	0.553674	1
HP_ELEVATED_C_REACTIVE_PROTEIN_LEVEL	26	0.34308	1.11909	0.28882	0.554011	1
GO_REGULATION_OF_MITOCHONDRIAL_OUTER_MEMBRANE_PERMEABILIZATION_INVOLVED_IN_APOPTOTIC_SIGNALING_PATHWAY	44	0.299394	1.11886	0.262799	0.554034	1
GO_NEUROPEPTIDE_RECEPTOR_ACTIVITY	20	0.369542	1.11873	0.28382	0.553851	1
GO_PHENOL_CONTAINING_COMPOUND_BIOSYNTHETIC_PROCESS	33	0.324834	1.11847	0.305085	0.553978	1
GO_ANTIPORTER_ACTIVITY	69	0.273427	1.11722	0.241107	0.556411	1
GO_REGULATION_OF_CELL_FATE_SPECIFICATION	12	0.425987	1.11711	0.317073	0.556186	1
HP_ABNORMALITY_OF_HAIR_PIGMENTATION	82	0.265884	1.11709	0.197368	0.555746	1
HP_AMINOACIDURIA	122	0.250142	1.11701	0.189189	0.55547	1
GO_FATTY_ACID_HOMEOSTASIS	13	0.408577	1.117	0.322751	0.555013	1
HP_PERIPHERAL_VISUAL_FIELD_LOSS	13	0.413001	1.11686	0.294271	0.554864	1
HP_VERTICAL_SUPRANUCLEAR_GAZE_PALSY	15	0.401499	1.11673	0.296496	0.554723	1
HP_URETERAL_OBSTRUCTION	22	0.36486	1.1167	0.291291	0.55432	1
GO_REGULATION_OF_POSTTRANSCRIPTIONAL_GENE_SILENCING	83	0.266003	1.11655	0.246753	0.554202	1
GO_PROTEIN_TYROSINE_PHOSPHATASE_ACTIVITY	91	0.26064	1.1165	0.24186	0.553834	1
GO_IMP_METABOLIC_PROCESS	10	0.440639	1.11628	0.316425	0.553881	1
GO_DICARBOXYLIC_ACID_CATABOLIC_PROCESS	15	0.397208	1.11576	0.314363	0.554676	1
GO_TELOMERE_ORGANIZATION	141	0.245807	1.1157	0.176471	0.554353	1
HP_BRADYKINESIA	89	0.262255	1.11549	0.236453	0.554324	1
HP_SELF_MUTILATION	26	0.343813	1.11483	0.276923	0.555423	1
HP_EPENDYMOMA	14	0.400819	1.11389	0.355615	0.557159	1
HP_ABNORMALITY_OF_THE_PARATHYROID_MORPHOLOGY	20	0.357074	1.11387	0.320225	0.556745	1
GO_RIBONUCLEOPROTEIN_COMPLEX	682	0.21428	1.11385	0	0.556297	1
GO_BROWN_FAT_CELL_DIFFERENTIATION	42	0.309477	1.11376	0.274021	0.556047	1
GO_SPONTANEOUS_SYNAPTIC_TRANSMISSION	11	0.425684	1.11341	0.311225	0.556396	1
GO_REGULATION_OF_CELLULAR_RESPONSE_TO_HEAT	78	0.267292	1.11271	0.267241	0.557612	1
HP_MANDIBULAR_APLASIA	13	0.403729	1.11169	0.323155	0.559561	1
GO_REGULATION_OF_PH	86	0.262492	1.11167	0.223256	0.55912	1
HP_FOCAL_IMPAIRED_AWARENESS_SEIZURE	42	0.303335	1.11165	0.262976	0.558683	1
HP_EXCESSIVE_SALIVATION	88	0.261187	1.11142	0.208661	0.558733	1
GO_NUCLEAR_TRANSCRIBED_MRNA_CATABOLIC_PROCESS	206	0.229964	1.11122	0.157025	0.558702	1
GO_RNA_POLYMERASE_II_HOLOENZYME	76	0.265091	1.11112	0.257642	0.558483	1
GO_INTESTINAL_ABSORPTION	32	0.318893	1.11108	0.286164	0.558106	1
GO_PIRNA_METABOLIC_PROCESS	14	0.390203	1.11086	0.326146	0.558121	1
GO_RETROGRADE_VESICLE_MEDIATED_TRANSPORT_GOLGI_TO_ENDOPLASMIC_RETICULUM	85	0.259855	1.11072	0.242424	0.557983	1
GO_NATURAL_KILLER_CELL_PROLIFERATION	11	0.42159	1.1102	0.338636	0.558725	1
GO_PROTEIN_LOCALIZATION_TO_CELL_CORTEX	11	0.432826	1.11002	0.32419	0.558698	1
GO_REGULATION_OF_CHROMATIN_BINDING	23	0.359998	1.10994	0.301408	0.558403	1
HP_URETHRAL_ATRESIA	20	0.372331	1.10983	0.309973	0.558208	1
GO_SULFUR_AMINO_ACID_METABOLIC_PROCESS	37	0.312824	1.10969	0.28	0.5581	1
HP_ABNORMAL_INSULIN_LEVEL	121	0.250173	1.10949	0.203822	0.558105	1
HP_BIPARIETAL_NARROWING	60	0.282459	1.10915	0.253906	0.558435	1
GO_POST_MRNA_RELEASE_SPLICEOSOMAL_COMPLEX	13	0.400821	1.10887	0.311111	0.558622	1
GO_HISTONE_H4_ACETYLATION	66	0.283307	1.10852	0.27897	0.558967	1
GO_SYNAPTIC_VESICLE_PRIMING	18	0.37503	1.1085	0.325203	0.558538	1
GO_CHEMOSENSORY_BEHAVIOR	12	0.421335	1.10823	0.339241	0.558694	1
HP_ABDOMINAL_WALL_MUSCLE_WEAKNESS	11	0.433315	1.10723	0.30203	0.560531	1
GO_REGULATION_OF_FERTILIZATION	18	0.373831	1.10702	0.324859	0.560578	1
GO_LATE_ENDOSOME	258	0.222036	1.10665	0.156863	0.560916	1
GO_HISTONE_H3_K4_METHYLATION	49	0.293196	1.10642	0.289474	0.561034	1
GO_RIG_I_SIGNALING_PATHWAY	23	0.35105	1.10629	0.311765	0.560892	1
GO_MANNOSYLTRANSFERASE_ACTIVITY	28	0.336	1.10576	0.322476	0.561744	1
GO_MITOCHONDRIAL_MATRIX	447	0.217721	1.10558	0.133333	0.561707	1
HP_VISUAL_HALLUCINATIONS	17	0.377225	1.10491	0.287324	0.562753	1
GO_ORGANIC_CATION_TRANSPORT	37	0.308378	1.10481	0.305136	0.562527	1
HP_ABNORMAL_GERM_CELL_MORPHOLOGY	18	0.379121	1.10469	0.327778	0.562332	1
GO_POSITIVE_REGULATION_OF_TRANSCRIPTION_FROM_RNA_POLYMERASE_II_PROMOTER_INVOLVED_IN_CELLULAR_RESPONSE_TO_CHEMICAL_STIMULUS	21	0.355312	1.10429	0.297143	0.562846	1
GO_INTRA_S_DNA_DAMAGE_CHECKPOINT	15	0.385207	1.10427	0.326139	0.562407	1
HP_FASCICULATIONS	72	0.265423	1.10415	0.256198	0.562243	1
HP_SCARRING_ALOPECIA_OF_SCALP	12	0.420172	1.10405	0.322917	0.562008	1
GO_PROTEIN_DEGLYCOSYLATION	27	0.333981	1.10396	0.295181	0.561759	1
GO_REGULATION_OF_MAST_CELL_ACTIVATION	34	0.315439	1.10359	0.28479	0.562213	1
GO_REGULATION_OF_CELLULAR_CATABOLIC_PROCESS	814	0.206068	1.10206	0	0.565329	1
GO_REGULATION_OF_TRANSCRIPTION_ELONGATION_FROM_RNA_POLYMERASE_II_PROMOTER	26	0.335242	1.10168	0.305882	0.56577	1
GO_FATTY_ACID_DERIVATIVE_BINDING	27	0.335643	1.10164	0.305195	0.565391	1
HP_BRISK_REFLEXES	25	0.335562	1.10103	0.285303	0.566405	1
GO_POSITIVE_REGULATION_OF_MACROAUTOPHAGY	63	0.272691	1.10045	0.281124	0.56727	1
GO_DETECTION_OF_OTHER_ORGANISM	14	0.383467	1.10025	0.341207	0.567271	1
HP_ABNORMAL_LEVELS_OF_ALPHA_FETOPROTEIN	22	0.351468	1.09994	0.315942	0.56756	1
GO_REGULATION_OF_INTRACELLULAR_STEROID_HORMONE_RECEPTOR_SIGNALING_PATHWAY	73	0.270434	1.09917	0.267544	0.568923	1
GO_STEROID_HORMONE_MEDIATED_SIGNALING_PATHWAY	127	0.244177	1.099	0.231638	0.568886	1
GO_ACROSOME_REACTION	25	0.339741	1.09885	0.331395	0.568775	1
HP_PNEUMONIA	156	0.237255	1.09884	0.193103	0.568321	1
GO_GOLGI_TO_PLASMA_MEMBRANE_PROTEIN_TRANSPORT	38	0.308191	1.0984	0.314189	0.568886	1
GO_ENDODERMAL_CELL_FATE_COMMITMENT	13	0.406182	1.09831	0.361323	0.56863	1
HP_THIN_UPPER_LIP_VERMILION	208	0.22441	1.09819	0.183206	0.568472	1
GO_VESICLE_FUSION_TO_PLASMA_MEMBRANE	20	0.363847	1.09814	0.340909	0.568126	1
GO_MRNA_METABOLIC_PROCESS	815	0.202184	1.09802	0	0.567938	1
GO_MITOCHONDRIA_ASSOCIATED_ENDOPLASMIC_RETICULUM_MEMBRANE	15	0.388468	1.09713	0.348404	0.569569	1
HP_AMYOTROPHIC_LATERAL_SCLEROSIS	44	0.301654	1.09675	0.294498	0.56998	1
GO_OVARIAN_FOLLICLE_DEVELOPMENT	48	0.286879	1.09661	0.304348	0.569842	1
GO_AMMONIUM_ION_METABOLIC_PROCESS	19	0.367517	1.09657	0.347709	0.569465	1
HP_INFERTILITY	127	0.242111	1.09652	0.224599	0.569147	1
GO_PENTOSE_METABOLIC_PROCESS	13	0.404475	1.09624	0.346995	0.569297	1
GO_PHOSPHATIDYLINOSITOL_MONOPHOSPHATE_PHOSPHATASE_ACTIVITY	18	0.371207	1.09552	0.341737	0.57055	1
GO_MANGANESE_ION_BINDING	58	0.279661	1.09503	0.282443	0.571279	1
GO_REGULATION_OF_SISTER_CHROMATID_COHESION	21	0.348852	1.09454	0.31085	0.571933	1
GO_GOLGI_TO_ENDOSOME_TRANSPORT	17	0.366435	1.0945	0.34127	0.571562	1
HP_CHOLESTATIC_LIVER_DISEASE	10	0.438459	1.09443	0.342037	0.57125	1
GO_RIBONUCLEOPROTEIN_COMPLEX_SUBUNIT_ORGANIZATION	211	0.224236	1.09439	0.225	0.570893	1
GO_MANNOSYLATION	35	0.306009	1.09423	0.323432	0.570832	1
HP_PERIORBITAL_FULLNESS	51	0.28997	1.0942	0.287273	0.570429	1
GO_FIBRILLAR_CENTER	125	0.249318	1.09406	0.221557	0.570295	1
GO_SENSORY_PERCEPTION_OF_TASTE	35	0.313325	1.09395	0.299419	0.57009	1
HP_ABNORMAL_ELECTRORETINOGRAM	152	0.235649	1.09368	0.244898	0.57029	1
GO_OXIDOREDUCTASE_ACTIVITY_ACTING_ON_THE_CH_CH_GROUP_OF_DONORS_NAD_OR_NADP_AS_ACCEPTOR	26	0.328041	1.09355	0.362069	0.570127	1
GO_ORGANIC_ACID_SODIUM_SYMPORTER_ACTIVITY	22	0.35148	1.09303	0.319149	0.570862	1
GO_VACUOLE_ORGANIZATION	159	0.23654	1.09277	0.226027	0.570975	1
GO_MATURATION_OF_SSU_RRNA_FROM_TRICISTRONIC_RRNA_TRANSCRIPT_SSU_RRNA_5_8S_RRNA_LSU_RRNA	38	0.303419	1.09183	0.318339	0.572794	1
GO_COLLECTING_DUCT_DEVELOPMENT	10	0.438218	1.09091	0.367188	0.574537	1
GO_REGULATION_OF_PROTEASOMAL_PROTEIN_CATABOLIC_PROCESS	184	0.234292	1.09082	0.236842	0.574287	1
GO_AMYLOID_PRECURSOR_PROTEIN_BIOSYNTHETIC_PROCESS	14	0.395752	1.09022	0.366162	0.575255	1
HP_ABNORMAL_GLIAL_CELL_MORPHOLOGY	124	0.244713	1.0901	0.247191	0.575095	1
HP_SHAWL_SCROTUM	16	0.382149	1.08984	0.330645	0.575245	1
GO_PHOSPHATIDYLINOSITOL_3_PHOSPHATE_BIOSYNTHETIC_PROCESS	13	0.401038	1.08956	0.36409	0.575422	1
GO_MONOCARBOXYLIC_ACID_CATABOLIC_PROCESS	121	0.2433	1.08869	0.251366	0.577003	1
GO_ZINC_ION_TRANSPORT	24	0.337062	1.08797	0.319767	0.578281	1
GO_TRANSLATION_REPRESSOR_ACTIVITY	23	0.338512	1.08797	0.327684	0.577818	1
GO_TAU_PROTEIN_KINASE_ACTIVITY	22	0.353761	1.08788	0.334311	0.577546	1
GO_MRNA_CIS_SPLICING_VIA_SPLICEOSOME	37	0.30354	1.08783	0.307432	0.577178	1
GO_STEROID_BIOSYNTHETIC_PROCESS	161	0.23681	1.08735	0.208333	0.577914	1
HP_ATROPHY_DEGENERATION_INVOLVING_THE_SPINAL_CORD	11	0.423366	1.08688	0.329327	0.578609	1
HP_BRAIN_ATROPHY	580	0.207819	1.08673	0	0.578545	1
HP_BABINSKI_SIGN	212	0.225861	1.08665	0.209524	0.578279	1
GO_CALCIUM_ACTIVATED_CATION_CHANNEL_ACTIVITY	19	0.362031	1.08609	0.369748	0.579148	1
GO_TRANSFERASE_COMPLEX	737	0.200266	1.08603	0.157895	0.57882	1
HP_MOLAR_TOOTH_SIGN_ON_MRI	34	0.312366	1.08564	0.308475	0.57933	1
GO_PEPTIDYL_THREONINE_DEPHOSPHORYLATION	22	0.347078	1.08549	0.330383	0.57924	1
GO_SPLICEOSOMAL_COMPLEX_ASSEMBLY	63	0.271502	1.0853	0.31058	0.579242	1
HP_EPIPHYSEAL_STIPPLING	31	0.323705	1.0852	0.320242	0.579008	1
GO_RRNA_TRANSCRIPTION	30	0.321359	1.08387	0.330128	0.58176	1
GO_OLIGOPEPTIDE_TRANSPORT	11	0.428067	1.08336	0.348028	0.582527	1
HP_TRUNCAL_OBESITY	41	0.299628	1.08323	0.276094	0.582362	1
GO_STEROID_HORMONE_RECEPTOR_BINDING	77	0.265895	1.08254	0.274775	0.583562	1
HP_POLYARTICULAR_ARTHROPATHY	12	0.403409	1.08194	0.370927	0.584539	1
GO_ACTIVATION_OF_JNKK_ACTIVITY	11	0.419923	1.0816	0.366995	0.58491	1
GO_REGULATION_OF_NUCLEAR_TRANSCRIBED_MRNA_CATABOLIC_PROCESS_DEADENYLATION_DEPENDENT_DECAY	19	0.359159	1.08103	0.387574	0.585771	1
GO_NEGATIVE_REGULATION_OF_JUN_KINASE_ACTIVITY	11	0.420169	1.08068	0.351421	0.586151	1
GO_POSITIVE_REGULATION_OF_GLUCONEOGENESIS	13	0.401965	1.08049	0.369565	0.586178	1
GO_CELLULAR_LIPID_CATABOLIC_PROCESS	198	0.225557	1.08047	0.212389	0.585781	1
GO_GLYCEROLIPID_BIOSYNTHETIC_PROCESS	241	0.218336	1.08017	0.168539	0.586032	1
GO_NEGATIVE_REGULATION_OF_REACTIVE_OXYGEN_SPECIES_METABOLIC_PROCESS	51	0.277303	1.07997	0.322807	0.586044	1
GO_GOLGI_ASSOCIATED_VESICLE_MEMBRANE	102	0.245202	1.07967	0.271845	0.586346	1
HP_PITUITARY_ADENOMA	33	0.318522	1.07945	0.326087	0.586433	1
GO_REGULATION_OF_TRANSLATIONAL_TERMINATION	10	0.428039	1.07878	0.346835	0.587574	1
HP_TUBULOINTERSTITIAL_NEPHRITIS	19	0.35919	1.07737	0.339339	0.590532	1
GO_CELLULAR_KETONE_METABOLIC_PROCESS	220	0.227193	1.07733	0.226891	0.590159	1
GO_PROTEIN_DNA_COMPLEX	98	0.248928	1.07729	0.31068	0.589793	1
GO_REGULATION_OF_LIPOPROTEIN_METABOLIC_PROCESS	14	0.386686	1.07729	0.35567	0.589332	1
HP_ABNORMAL_CIRCULATING_FATTY_ACID_CONCENTRATION	39	0.292859	1.0772	0.32381	0.589101	1
HP_SAGITTAL_CRANIOSYNOSTOSIS	14	0.393375	1.07647	0.325137	0.590379	1
GO_DETECTION_OF_EXTERNAL_BIOTIC_STIMULUS	18	0.353455	1.07468	0.378082	0.594351	1
GO_TRANSCRIPTION_COFACTOR_BINDING	48	0.282167	1.07413	0.332155	0.59522	1
HP_PERIVENTRICULAR_LEUKOMALACIA	25	0.324585	1.07311	0.328446	0.597286	1
GO_EXTRACELLULAR_LIGAND_GATED_ION_CHANNEL_ACTIVITY	45	0.288136	1.07311	0.330882	0.596837	1
GO_POSITIVE_REGULATION_OF_NEUROTRANSMITTER_SECRETION	23	0.342358	1.07292	0.3531	0.596808	1
GO_AUDITORY_RECEPTOR_CELL_MORPHOGENESIS	14	0.396307	1.0727	0.389646	0.596901	1
GO_DNA_DEALKYLATION_INVOLVED_IN_DNA_REPAIR	10	0.433173	1.07253	0.367397	0.596849	1
GO_HISTONE_BINDING	217	0.223733	1.07215	0.239316	0.597312	1
GO_NUCLEASE_ACTIVITY	187	0.229088	1.07173	0.272727	0.597902	1
HP_CARDIAC_DIVERTICULUM	14	0.391073	1.07135	0.36962	0.598396	1
GO_MULTIVESICULAR_BODY_ORGANIZATION	31	0.30962	1.07134	0.316294	0.59796	1
HP_ACUTE_LYMPHOBLASTIC_LEUKEMIA	20	0.351716	1.07099	0.350427	0.598327	1
GO_POSITIVE_REGULATION_OF_LIPID_CATABOLIC_PROCESS	22	0.339087	1.07079	0.341108	0.598395	1
HP_INCREASED_HEPATOCELLULAR_LIPID_DROPLETS	11	0.404137	1.07074	0.370192	0.598058	1
GO_HISTONE_METHYLTRANSFERASE_ACTIVITY_H3_K4_SPECIFIC	15	0.392732	1.07039	0.371353	0.598469	1
HP_EPISODIC_ABDOMINAL_PAIN	33	0.307717	1.0702	0.330189	0.598455	1
GO_NUCLEAR_BODY	750	0.200965	1.07016	0.166667	0.598103	1
GO_PEPTIDYL_TYROSINE_DEPHOSPHORYLATION	93	0.250734	1.0701	0.291866	0.59778	1
GO_CELLULAR_RESPONSE_TO_ANTIBIOTIC	12	0.408043	1.06985	0.359173	0.597929	1
GO_OXIDOREDUCTASE_ACTIVITY_ACTING_ON_THE_CH_CH_GROUP_OF_DONORS	57	0.273174	1.0694	0.325843	0.598576	1
GO_NUCLEOTIDE_SUGAR_TRANSMEMBRANE_TRANSPORT	12	0.409822	1.06939	0.414439	0.598123	1
GO_REGULATION_OF_CILIUM_DEPENDENT_CELL_MOTILITY	15	0.374901	1.06935	0.356742	0.59776	1
GO_PROTEIN_KINASE_A_REGULATORY_SUBUNIT_BINDING	24	0.330374	1.06925	0.350769	0.597531	1
HP_CUTANEOUS_PHOTOSENSITIVITY	70	0.260163	1.0691	0.285124	0.597451	1
GO_VITAMIN_TRANSPORT	32	0.311837	1.06901	0.335385	0.597217	1
GO_NOREPINEPHRINE_METABOLIC_PROCESS	10	0.437622	1.06894	0.398477	0.596941	1
HP_INCREASED_PURINE_LEVEL	24	0.329946	1.06881	0.364432	0.596826	1
GO_NEGATIVE_REGULATION_OF_DNA_RECOMBINATION	33	0.319405	1.06808	0.333333	0.598056	1
GO_ESTRADIOL_17_BETA_DEHYDROGENASE_ACTIVITY	11	0.425682	1.06794	0.39599	0.597959	1
GO_FAT_SOLUBLE_VITAMIN_BIOSYNTHETIC_PROCESS	11	0.409127	1.06784	0.364322	0.597729	1
HP_SUDDEN_EPISODIC_APNEA	12	0.403451	1.06744	0.39314	0.598251	1
HP_AQUEDUCTAL_STENOSIS	16	0.36719	1.06716	0.374302	0.598496	1
GO_ASPARTATE_FAMILY_AMINO_ACID_BIOSYNTHETIC_PROCESS	19	0.354744	1.06689	0.365333	0.598713	1
GO_INTRACELLULAR_STEROID_HORMONE_RECEPTOR_SIGNALING_PATHWAY	107	0.242177	1.06656	0.258883	0.599082	1
GO_ATP_TRANSPORT	22	0.333144	1.06614	0.326531	0.599611	1
GO_NEGATIVE_REGULATION_OF_TRANSLATIONAL_INITIATION	18	0.362504	1.0654	0.385269	0.600959	1
GO_PROTEIN_TRANSMEMBRANE_TRANSPORT	60	0.272918	1.06512	0.345238	0.601206	1
GO_FATTY_ACID_CATABOLIC_PROCESS	102	0.245246	1.06504	0.321053	0.600953	1
GO_RNA_CAP_BINDING_COMPLEX	12	0.418318	1.06487	0.375587	0.600897	1
GO_UBIQUITIN_LIKE_PROTEIN_LIGASE_ACTIVITY	260	0.214464	1.06468	0.215686	0.600915	1
GO_INTRACILIARY_TRANSPORT_PARTICLE	26	0.335463	1.0645	0.365031	0.60092	1
HP_DELAYED_ABILITY_TO_WALK	88	0.252062	1.06252	0.328829	0.605255	1
HP_INCREASED_THYROID_STIMULATING_HORMONE_LEVEL	12	0.402431	1.06231	0.369928	0.605315	1
GO_PHENOL_CONTAINING_COMPOUND_METABOLIC_PROCESS	84	0.246808	1.0617	0.320346	0.606325	1
GO_OXIDIZED_DNA_BINDING	11	0.406362	1.06099	0.390244	0.607651	1
GO_POSITIVE_REGULATION_OF_SKELETAL_MUSCLE_TISSUE_DEVELOPMENT	18	0.353909	1.06045	0.343324	0.608539	1
GO_LONG_CHAIN_FATTY_ACYL_COA_METABOLIC_PROCESS	23	0.335399	1.06021	0.38587	0.60869	1
GO_3_5_EXODEOXYRIBONUCLEASE_ACTIVITY	10	0.414402	1.05977	0.373786	0.609312	1
HP_DECREASED_ACTIVITY_OF_THE_PYRUVATE_DEHYDROGENASE_COMPLEX	33	0.311179	1.05967	0.36129	0.609074	1
GO_RIBOSOMAL_SMALL_SUBUNIT_BIOGENESIS	75	0.257364	1.05927	0.327731	0.609586	1
HP_11_PAIRS_OF_RIBS	24	0.335898	1.05747	0.368263	0.613613	1
HP_ABNORMALITY_OF_VISUAL_EVOKED_POTENTIALS	42	0.291041	1.05708	0.337884	0.614146	1
GO_POSITIVE_REGULATION_OF_MRNA_3_END_PROCESSING	11	0.419247	1.05704	0.405941	0.613785	1
HP_DEVIATION_OF_THE_5TH_TOE	12	0.40602	1.05661	0.385542	0.614412	1
GO_REGULATION_OF_HISTONE_H3_K9_TRIMETHYLATION	11	0.409916	1.05646	0.397959	0.614318	1
GO_NUCLEOLUS	982	0.199611	1.05612	0	0.614717	1
GO_AMINO_ACID_SODIUM_SYMPORTER_ACTIVITY	12	0.407294	1.05555	0.406915	0.615687	1
HP_RETINAL_PIGMENT_EPITHELIAL_ATROPHY	18	0.356753	1.0543	0.386059	0.618263	1
GO_REGULATION_OF_MEMBRANE_PERMEABILITY	78	0.251852	1.05374	0.327354	0.619177	1
GO_LONG_CHAIN_FATTY_ACID_BINDING	12	0.403273	1.05323	0.371274	0.619974	1
HP_HAND_MUSCLE_WEAKNESS	31	0.301766	1.05271	0.416404	0.620791	1
GO_BRANCHED_CHAIN_AMINO_ACID_METABOLIC_PROCESS	23	0.32622	1.05219	0.370057	0.621545	1
GO_FORMATION_OF_TRANSLATION_PREINITIATION_COMPLEX	11	0.405459	1.05148	0.375	0.622837	1
HP_ASTHMA	117	0.235096	1.05103	0.327778	0.623508	1
HP_MEDIAL_FLARING_OF_THE_EYEBROW	26	0.326978	1.05079	0.381988	0.623652	1
GO_CELL_CYCLE_DNA_REPLICATION	65	0.259349	1.05028	0.32549	0.624491	1
HP_RETINAL_THINNING	10	0.420873	1.04968	0.424552	0.625555	1
GO_CELL_CORTEX_REGION	39	0.292117	1.04958	0.381107	0.625332	1
HP_RENAL_FIBROSIS	10	0.415889	1.04938	0.394015	0.625353	1
GO_PHOSPHATIDYLINOSITOL_PHOSPHATE_5_PHOSPHATASE_ACTIVITY	12	0.396046	1.04918	0.378947	0.625409	1
HP_PIERRE_ROBIN_SEQUENCE	17	0.359406	1.04891	0.396122	0.6256	1
GO_ORGANOPHOSPHATE_ESTER_TRANSPORT	112	0.242076	1.04884	0.323529	0.625307	1
GO_NF_KAPPAB_BINDING	31	0.306135	1.04775	0.381868	0.627552	1
HP_ABNORMAL_PYRAMIDAL_SIGN	315	0.210845	1.04705	0.298701	0.628811	1
GO_LIGAND_ACTIVATED_TRANSCRIPTION_FACTOR_ACTIVITY	47	0.274705	1.04701	0.346008	0.628455	1
GO_ORGANIC_CATION_TRANSMEMBRANE_TRANSPORTER_ACTIVITY	16	0.375276	1.04636	0.416438	0.629648	1
HP_ATTENUATION_OF_RETINAL_BLOOD_VESSELS	33	0.306629	1.0462	0.376238	0.629565	1
GO_INTRACELLULAR_STEROL_TRANSPORT	21	0.343214	1.04564	0.399433	0.630541	1
GO_RESPONSE_TO_GAMMA_RADIATION	53	0.270504	1.04523	0.389105	0.631093	1
GO_ADAPTATION_OF_SIGNALING_PATHWAY	17	0.362418	1.04515	0.413158	0.630844	1
GO_GOLGI_TO_PLASMA_MEMBRANE_TRANSPORT	57	0.273975	1.04501	0.371324	0.630718	1
GO_NUCLEOTIDYLTRANSFERASE_ACTIVITY	119	0.235461	1.04467	0.344262	0.631133	1
GO_AU_RICH_ELEMENT_BINDING	24	0.324694	1.04429	0.375723	0.631674	1
GO_TELOMERASE_RNA_LOCALIZATION	19	0.341551	1.0442	0.40113	0.631431	1
GO_LIPOPROTEIN_METABOLIC_PROCESS	123	0.232605	1.04408	0.32	0.631228	1
HP_PROGRESSIVE_ENCEPHALOPATHY	11	0.402241	1.04407	0.393531	0.630799	1
HP_REDUCED_ANTITHROMBIN_III_ACTIVITY	11	0.407355	1.04375	0.397059	0.631181	1
HP_CARCINOID_TUMOR	12	0.397884	1.04329	0.4025	0.631814	1
GO_REGULATION_OF_FEMALE_GONAD_DEVELOPMENT	10	0.41707	1.043	0.402913	0.632097	1
GO_POSITIVE_REGULATION_OF_LAMELLIPODIUM_ASSEMBLY	22	0.332033	1.0429	0.388235	0.631872	1
GO_PROTEIN_ACETYLTRANSFERASE_COMPLEX	89	0.250974	1.04278	0.395122	0.631726	1
GO_PROTEIN_TARGETING_TO_MITOCHONDRION	96	0.240627	1.04266	0.329843	0.631541	1
HP_EMOTIONAL_LABILITY	110	0.233938	1.04226	0.382857	0.632078	1
GO_NEGATIVE_REGULATION_OF_REACTIVE_OXYGEN_SPECIES_BIOSYNTHETIC_PROCESS	28	0.316577	1.04202	0.385113	0.632216	1
GO_MEMBRANE_DOCKING	174	0.221188	1.04083	0.367347	0.634735	1
GO_RNA_HELICASE_ACTIVITY	75	0.256221	1.04028	0.365546	0.635703	1
GO_REGULATION_OF_MITOCHONDRION_ORGANIZATION	182	0.220778	1.03992	0.362963	0.636184	1
GO_PYRIMIDINE_NUCLEOTIDE_SUGAR_TRANSMEMBRANE_TRANSPORTER_ACTIVITY	10	0.405311	1.03985	0.40399	0.635892	1
GO_TELOMERASE_HOLOENZYME_COMPLEX	19	0.350972	1.03979	0.396552	0.635581	1
GO_HISTONE_LYSINE_N_METHYLTRANSFERASE_ACTIVITY	41	0.286585	1.03931	0.394904	0.636247	1
GO_PIGMENT_GRANULE_ORGANIZATION	27	0.314659	1.0393	0.37386	0.635835	1
GO_CYTOPLASMIC_STRESS_GRANULE	72	0.25295	1.03891	0.348178	0.636383	1
GO_PORE_COMPLEX_ASSEMBLY	20	0.340148	1.03865	0.387755	0.636558	1
HP_CLUBBING	104	0.238484	1.03832	0.312821	0.636944	1
GO_POSITIVE_REGULATION_OF_GLUTAMATE_RECEPTOR_SIGNALING_PATHWAY	12	0.391832	1.03796	0.381333	0.637368	1
GO_NUCLEAR_IMPORT_SIGNAL_RECEPTOR_ACTIVITY	19	0.338967	1.03725	0.376147	0.638698	1
GO_RESPONSE_TO_PEPTIDOGLYCAN	12	0.400155	1.03722	0.397468	0.638326	1
GO_PRE_MIRNA_PROCESSING	14	0.373825	1.03704	0.398936	0.63833	1
GO_POSITIVE_REGULATION_OF_MYELOID_LEUKOCYTE_MEDIATED_IMMUNITY	26	0.316585	1.03701	0.386707	0.637942	1
HP_FRONTAL_LOBE_DEMENTIA	17	0.34825	1.03696	0.408602	0.637613	1
GO_REGULATION_OF_ORGANELLE_ASSEMBLY	177	0.221189	1.03533	0.352113	0.641292	1
GO_PLASMA_LIPOPROTEIN_PARTICLE_CLEARANCE	46	0.281018	1.03498	0.397059	0.641719	1
GO_CD4_POSITIVE_OR_CD8_POSITIVE_ALPHA_BETA_T_CELL_LINEAGE_COMMITMENT	20	0.338588	1.03475	0.399449	0.641858	1
GO_NEGATIVE_REGULATION_OF_CELL_SIZE	10	0.412591	1.03473	0.418269	0.641436	1
GO_MAINTENANCE_OF_SISTER_CHROMATID_COHESION	11	0.409606	1.03441	0.41791	0.641794	1
HP_FURROWED_TONGUE	33	0.289466	1.03387	0.416393	0.642731	1
GO_TOXIN_METABOLIC_PROCESS	12	0.400761	1.03279	0.405473	0.644986	1
GO_PEPTIDE_DISULFIDE_OXIDOREDUCTASE_ACTIVITY	13	0.382414	1.03238	0.427848	0.645583	1
GO_PROTEASOME_ACCESSORY_COMPLEX	24	0.319682	1.03225	0.422741	0.645446	1
GO_PROTEIN_AUTO_ADP_RIBOSYLATION	11	0.399478	1.03214	0.418317	0.645214	1
GO_EXONUCLEASE_ACTIVITY	81	0.243791	1.03211	0.373874	0.644847	1
GO_CELLULAR_PIGMENTATION	51	0.272517	1.03148	0.396491	0.645972	1
HP_HOLOPROSENCEPHALY	57	0.263788	1.03138	0.424125	0.645748	1
GO_TELOMERIC_LOOP_DISASSEMBLY	11	0.405183	1.03099	0.407323	0.646283	1
GO_REGULATION_OF_MITOTIC_SPINDLE_ASSEMBLY	17	0.352686	1.0308	0.439024	0.646302	1
HP_ELEVATED_CALCITONIN	18	0.341349	1.03078	0.418231	0.645898	1
GO_MITOCHONDRION_ORGANIZATION	527	0.194405	1.0307	0.363636	0.645643	1
HP_POSTAXIAL_HAND_POLYDACTYLY	88	0.239496	1.03069	0.389163	0.645211	1
GO_SOMITE_ROSTRAL_CAUDAL_AXIS_SPECIFICATION	12	0.392152	1.03044	0.434146	0.64538	1
GO_SPHINGOLIPID_BINDING	19	0.341321	1.02993	0.409214	0.64621	1
GO_G_QUADRUPLEX_DNA_BINDING	10	0.412233	1.02913	0.42716	0.647736	1
GO_NUCLEAR_EUCHROMATIN	21	0.331573	1.02884	0.429429	0.64798	1
HP_LATERAL_CLAVICLE_HOOK	15	0.372734	1.02873	0.411765	0.647809	1
GO_UBIQUITIN_LIGASE_SUBSTRATE_ADAPTOR_ACTIVITY	13	0.372685	1.0286	0.424324	0.647686	1
GO_FERTILIZATION	129	0.226531	1.02857	0.405714	0.647306	1
GO_POSITIVE_REGULATION_OF_ERAD_PATHWAY	15	0.35483	1.0285	0.421333	0.647036	1
HP_ANENCEPHALY	55	0.268449	1.0282	0.417544	0.647323	1
HP_ABNORMAL_SIZE_OF_THE_CLITORIS	52	0.269126	1.02799	0.387352	0.647397	1
GO_ASTER	11	0.400736	1.02735	0.438119	0.648586	1
HP_PANCREATIC_CYSTS	28	0.30976	1.02684	0.416918	0.649412	1
GO_ESCRT_COMPLEX	27	0.314994	1.02678	0.42638	0.6491	1
HP_ABNORMAL_CIRCULATING_PURINE_CONCENTRATION	30	0.302263	1.02667	0.393293	0.648902	1
GO_MULTIVESICULAR_BODY_MEMBRANE	12	0.385432	1.02589	0.420398	0.650412	1
HP_HEPATIC_FIBROSIS	109	0.237074	1.02585	0.398844	0.650051	1
GO_PHOTORECEPTOR_CELL_CILIUM	86	0.243874	1.02546	0.408072	0.650609	1
HP_CUTANEOUS_MELANOMA	13	0.379849	1.02448	0.431937	0.6526	1
HP_ABNORMALITY_OF_MIDBRAIN_MORPHOLOGY	52	0.270875	1.02434	0.393574	0.652481	1
HP_ATTENTION_DEFICIT_HYPERACTIVITY_DISORDER	211	0.212956	1.02425	0.361905	0.652244	1
GO_HYDROGEN_PEROXIDE_CATABOLIC_PROCESS	19	0.34396	1.02372	0.441011	0.653098	1
HP_SCHIZOPHRENIA	51	0.271917	1.02355	0.408602	0.653078	1
HP_ABNORMAL_BLOOD_TRANSITION_ELEMENT_CATION_CONCENTRATION	27	0.305761	1.02318	0.431034	0.653546	1
HP_EEG_WITH_MULTIFOCAL_SLOW_ACTIVITY	35	0.286909	1.02304	0.425868	0.653451	1
GO_RESPONSE_TO_ARSENIC_CONTAINING_SUBSTANCE	34	0.296041	1.02303	0.39404	0.653028	1
GO_PROTEIN_HORMONE_RECEPTOR_ACTIVITY	12	0.377244	1.02242	0.427861	0.654138	1
HP_INABILITY_TO_WALK	167	0.214202	1.02204	0.398438	0.654689	1
GO_SULFURTRANSFERASE_ACTIVITY	10	0.4113	1.02169	0.426799	0.655063	1
GO_CD8_POSITIVE_ALPHA_BETA_T_CELL_ACTIVATION	21	0.330067	1.02167	0.438095	0.65465	1
HP_NARROW_PALPEBRAL_FISSURE	38	0.286152	1.02154	0.405594	0.654539	1
GO_CELLULAR_IRON_ION_HOMEOSTASIS	63	0.260275	1.02154	0.380952	0.654093	1
GO_PROTEIN_K48_LINKED_DEUBIQUITINATION	34	0.295529	1.02105	0.402778	0.654838	1
GO_MITOGEN_ACTIVATED_PROTEIN_KINASE_BINDING	32	0.300427	1.02067	0.439103	0.655341	1
GO_OMEGA_PEPTIDASE_ACTIVITY	98	0.233422	1.01995	0.412371	0.656719	1
GO_STAGA_COMPLEX	12	0.391863	1.01937	0.427835	0.657722	1
GO_LYSINE_N_METHYLTRANSFERASE_ACTIVITY	56	0.259978	1.01907	0.428571	0.658058	1
GO_REGULATION_OF_MAST_CELL_ACTIVATION_INVOLVED_IN_IMMUNE_RESPONSE	25	0.316592	1.01866	0.402985	0.658655	1
GO_FOLIC_ACID_CONTAINING_COMPOUND_METABOLIC_PROCESS	25	0.321112	1.01854	0.419643	0.658499	1
GO_PURINE_NUCLEOTIDE_TRANSPORT	27	0.309598	1.0175	0.40274	0.660708	1
GO_REGULATION_OF_LAMELLIPODIUM_ASSEMBLY	33	0.292181	1.01746	0.4125	0.660362	1
GO_PROTEASOMAL_PROTEIN_CATABOLIC_PROCESS	463	0.198504	1.01731	0.340909	0.660265	1
GO_EMBRYONIC_DIGESTIVE_TRACT_MORPHOGENESIS	12	0.385719	1.01731	0.425743	0.659812	1
GO_POSITIVE_REGULATION_OF_LEUKOCYTE_DEGRANULATION	20	0.332654	1.0172	0.429775	0.65964	1
GO_REGULATION_OF_TRANSLATIONAL_INITIATION	71	0.252305	1.01681	0.381743	0.6602	1
HP_THROMBOCYTOSIS	27	0.312627	1.01678	0.452055	0.659821	1
GO_VACUOLAR_TRANSPORT	144	0.221907	1.01628	0.43871	0.660656	1
HP_ACIDEMIA	17	0.353416	1.01576	0.452514	0.661519	1
HP_APLASIA_HYPOPLASIA_OF_THE_HUMERUS	23	0.319067	1.01569	0.428969	0.661236	1
GO_DICARBOXYLIC_ACID_TRANSMEMBRANE_TRANSPORTER_ACTIVITY	33	0.292614	1.01566	0.414861	0.660868	1
GO_SECONDARY_METABOLITE_BIOSYNTHETIC_PROCESS	20	0.330939	1.01563	0.463687	0.660478	1
GO_NEGATIVE_REGULATION_OF_TRANSCRIPTION_REGULATORY_REGION_DNA_BINDING	19	0.34131	1.01402	0.462338	0.664155	1
GO_NUCLEOTIDE_PHOSPHORYLATION	123	0.232859	1.01386	0.408046	0.664089	1
GO_REGULATION_OF_VIRAL_INDUCED_CYTOPLASMIC_PATTERN_RECOGNITION_RECEPTOR_SIGNALING_PATHWAY	20	0.326117	1.01376	0.427692	0.663911	1
GO_MITOCHONDRIAL_TRNA_PROCESSING	12	0.378551	1.01275	0.440415	0.666084	1
GO_HISTONE_METHYLTRANSFERASE_ACTIVITY	54	0.259696	1.01233	0.373585	0.666712	1
HP_GLIOMA	35	0.287988	1.01194	0.442623	0.667261	1
GO_NEGATIVE_REGULATION_OF_INTERLEUKIN_12_PRODUCTION	12	0.384068	1.01176	0.423377	0.667288	1
GO_PROTON_EXPORTING_ATPASE_ACTIVITY_PHOSPHORYLATIVE_MECHANISM	12	0.38765	1.0113	0.448549	0.667974	1
GO_INTRACELLULAR_LIPID_TRANSPORT	39	0.284656	1.01114	0.446667	0.667963	1
GO_NEGATIVE_REGULATION_OF_ORGANELLE_ASSEMBLY	37	0.290232	1.01108	0.408027	0.667654	1
HP_PSYCHOGENIC_NON_EPILEPTIC_SEIZURE	33	0.294384	1.01102	0.441781	0.66736	1
GO_REGULATION_OF_SUPEROXIDE_ANION_GENERATION	19	0.339638	1.01057	0.454286	0.668031	1
HP_DEVIATION_OF_THE_THUMB	32	0.295552	1.01024	0.438871	0.668435	1
GO_INTRINSIC_COMPONENT_OF_EXTERNAL_SIDE_OF_PLASMA_MEMBRANE	17	0.350649	1.0099	0.423181	0.668848	1
GO_PRESYNAPTIC_MODULATION_OF_CHEMICAL_SYNAPTIC_TRANSMISSION	14	0.380595	1.00962	0.445293	0.669093	1
HP_GANGRENE	45	0.272944	1.00899	0.44523	0.670209	1
GO_MITOCHONDRIAL_TRANSCRIPTION	15	0.365372	1.00895	0.420918	0.669859	1
GO_CELLULAR_AMINO_ACID_BIOSYNTHETIC_PROCESS	74	0.246781	1.00872	0.443038	0.669977	1
HP_COLOR_VISION_DEFECT	76	0.247792	1.00865	0.401639	0.669709	1
HP_EPIDERMAL_ACANTHOSIS	32	0.295605	1.00809	0.44186	0.670687	1
GO_ALPHA_AMINO_ACID_METABOLIC_PROCESS	175	0.214726	1.00763	0.444444	0.671423	1
GO_NEGATIVE_REGULATION_OF_PROTEIN_CATABOLIC_PROCESS	119	0.225223	1.00742	0.456647	0.671491	1
GO_MALE_MEIOTIC_NUCLEAR_DIVISION	39	0.280707	1.00716	0.452145	0.671732	1
GO_L_ASPARTATE_TRANSMEMBRANE_TRANSPORT	10	0.413992	1.00687	0.447761	0.672024	1
GO_POSITIVE_REGULATION_OF_MRNA_METABOLIC_PROCESS	73	0.243971	1.00599	0.413223	0.673883	1
HP_ABNORMAL_ILEUM_MORPHOLOGY	61	0.25774	1.00562	0.470588	0.674363	1
GO_CELL_CELL_JUNCTION_MAINTENANCE	12	0.369367	1.00561	0.456576	0.673949	1
HP_CENTRAL_ADRENAL_INSUFFICIENCY	13	0.382775	1.00552	0.447942	0.673726	1
HP_SCLEROCORNEA	33	0.290561	1.00535	0.456456	0.673739	1
HP_IMPAIRED_TACTILE_SENSATION	11	0.390434	1.0049	0.424936	0.674399	1
GO_RIBOSOMAL_LARGE_SUBUNIT_BINDING	12	0.388757	1.0047	0.440204	0.674449	1
GO_PROTEIN_TYROSINE_THREONINE_PHOSPHATASE_ACTIVITY	10	0.404017	1.00445	0.449275	0.67462	1
GO_RETINAL_ROD_CELL_DIFFERENTIATION	12	0.38469	1.00443	0.448276	0.674226	1
HP_CONGENITAL_ICHTHYOSIFORM_ERYTHRODERMA	19	0.333671	1.00397	0.441926	0.674933	1
HP_FACIAL_HYPERTRICHOSIS	117	0.225253	1.00382	0.439252	0.674856	1
GO_POSITIVE_REGULATION_OF_MRNA_CATABOLIC_PROCESS	48	0.267929	1.00325	0.401316	0.675826	1
HP_CAPILLARY_HEMANGIOMA	32	0.295419	1.00123	0.458824	0.680528	1
HP_AUTISTIC_BEHAVIOR	409	0.19486	1.00122	0.403509	0.68011	1
GO_HEAT_SHOCK_PROTEIN_BINDING	122	0.221427	1.00051	0.459893	0.681513	1
GO_INTRINSIC_COMPONENT_OF_GOLGI_MEMBRANE	64	0.244621	0.999785	0.461864	0.682831	1
HP_PULMONARY_INSUFFICIENCY	17	0.344434	0.99977	0.414815	0.682416	1
GO_PROTEIN_SERINE_THREONINE_PHOSPHATASE_ACTIVITY	68	0.245928	0.999542	0.462555	0.68254	1
GO_MAGNESIUM_ION_TRANSPORT	17	0.343508	0.999515	0.42132	0.682153	1
HP_SEBORRHEIC_DERMATITIS	22	0.316541	0.998687	0.461538	0.683826	1
GO_1_ACYLGLYCEROL_3_PHOSPHATE_O_ACYLTRANSFERASE_ACTIVITY	15	0.347359	0.998515	0.455959	0.683782	1
GO_POSITIVE_REGULATION_OF_TELOMERE_MAINTENANCE	50	0.259972	0.998031	0.45993	0.684541	1
HP_STEREOTYPY	153	0.216539	0.998003	0.452229	0.684168	1
HP_SEVERE_POSTNATAL_GROWTH_RETARDATION	27	0.311469	0.99788	0.497076	0.684015	1
GO_MYELOID_CELL_APOPTOTIC_PROCESS	27	0.306365	0.99644	0.454839	0.687284	1
HP_IRIS_HYPOPIGMENTATION	48	0.268857	0.996389	0.466431	0.686949	1
GO_MODIFICATION_DEPENDENT_MACROMOLECULE_CATABOLIC_PROCESS	613	0.188914	0.996389	0.55	0.686494	1
GO_MITOCHONDRIAL_OUTER_MEMBRANE_PERMEABILIZATION	54	0.253905	0.995374	0.472222	0.688632	1
GO_NEURON_MATURATION	42	0.270962	0.995076	0.451389	0.688903	1
HP_ABNORMALITY_OF_THE_CEREBRAL_CORTEX	318	0.202143	0.9949	0.521739	0.688901	1
GO_POLE_PLASM	17	0.334448	0.994843	0.442935	0.68859	1
GO_RESPONSE_TO_MURAMYL_DIPEPTIDE	20	0.322137	0.994803	0.508671	0.688225	1
GO_SPERM_MOTILITY	59	0.249827	0.994585	0.469314	0.688346	1
GO_SNRNA_PROCESSING	25	0.305664	0.9943	0.437853	0.688617	1
HP_ABNORMAL_BREATH_SOUND	39	0.271252	0.994193	0.454545	0.688434	1
GO_NUCLEAR_RECEPTOR_BINDING	94	0.235392	0.993968	0.5	0.688536	1
HP_CHOLESTASIS	192	0.209101	0.993714	0.460317	0.688699	1
HP_WHITE_HAIR	15	0.351507	0.993526	0.450704	0.688708	1
HP_URETEROPELVIC_JUNCTION_OBSTRUCTION	11	0.383395	0.993018	0.501326	0.689543	1
HP_DUPLICATION_INVOLVING_BONES_OF_THE_FEET	104	0.223798	0.992388	0.478673	0.690723	1
HP_APLASIA_HYPOPLASIA_OF_METATARSAL_BONES	43	0.268661	0.991949	0.466431	0.691389	1
HP_ABNORMALITY_OF_LOWER_LIMB_METAPHYSES	18	0.328517	0.991855	0.455801	0.691159	1
HP_ABNORMALITY_OF_ALKALINE_PHOSPHATASE_LEVEL	63	0.251798	0.991161	0.458015	0.692481	1
GO_RECOMBINATIONAL_REPAIR	135	0.216724	0.99105	0.469799	0.692315	1
GO_DIOL_BIOSYNTHETIC_PROCESS	21	0.321889	0.990923	0.435065	0.692189	1
HP_METHYLMALONIC_ACIDURIA	14	0.35814	0.990598	0.469816	0.692562	1
GO_POSITIVE_REGULATION_OF_LEUKOCYTE_APOPTOTIC_PROCESS	22	0.321492	0.99005	0.488506	0.693493	1
GO_CYTOPLASMIC_TRANSLATION	100	0.232907	0.990006	0.510417	0.693153	1
GO_UNFOLDED_PROTEIN_BINDING	111	0.225065	0.989949	0.458333	0.692839	1
GO_MICROBODY	125	0.221176	0.989685	0.488235	0.693042	1
GO_L_ALPHA_AMINO_ACID_TRANSMEMBRANE_TRANSPORT	47	0.264166	0.989516	0.488372	0.693	1
GO_SERTOLI_CELL_DIFFERENTIATION	19	0.327929	0.989494	0.482456	0.692606	1
GO_POSITIVE_REGULATION_OF_JUN_KINASE_ACTIVITY	68	0.240628	0.989325	0.486381	0.692567	1
GO_CUL2_RING_UBIQUITIN_LIGASE_COMPLEX	14	0.367488	0.989129	0.457895	0.692619	1
HP_ABNORMAL_SERUM_FERRITIN	27	0.300383	0.989052	0.498423	0.692368	1
GO_ENDOPLASMIC_RETICULUM_GOLGI_INTERMEDIATE_COMPARTMENT_MEMBRANE	68	0.245455	0.989029	0.487179	0.691977	1
GO_BRUSH_BORDER_MEMBRANE	45	0.264087	0.988866	0.454861	0.691939	1
GO_MEMBRANE_COAT	92	0.22852	0.988728	0.470046	0.691847	1
GO_NEGATIVE_REGULATION_OF_CELLULAR_PROTEIN_CATABOLIC_PROCESS	77	0.235865	0.987691	0.467249	0.694047	1
HP_BREAST_APLASIA	15	0.342703	0.98763	0.463415	0.69376	1
GO_REGULATION_OF_MYELOID_LEUKOCYTE_MEDIATED_IMMUNITY	45	0.265296	0.987495	0.466667	0.693656	1
HP_NEOPLASM_OF_THE_PARATHYROID_GLAND	16	0.351957	0.987421	0.449468	0.693397	1
GO_MEDIUM_CHAIN_FATTY_ACID_METABOLIC_PROCESS	11	0.378797	0.987138	0.483412	0.693629	1
GO_REGULATION_OF_FATTY_ACID_BIOSYNTHETIC_PROCESS	42	0.270333	0.986966	0.45485	0.693607	1
GO_INTESTINAL_LIPID_ABSORPTION	14	0.355332	0.986866	0.464103	0.693397	1
HP_HYPOKINESIA	37	0.272141	0.986505	0.457447	0.69386	1
GO_SECONDARY_LYSOSOME	15	0.347873	0.986026	0.464286	0.694595	1
HP_CURLY_HAIR	22	0.308922	0.985678	0.464396	0.695021	1
GO_9PLUS2_MOTILE_CILIUM	83	0.234717	0.985456	0.468468	0.695101	1
GO_NEGATIVE_REGULATION_OF_FIBROBLAST_PROLIFERATION	27	0.308259	0.985406	0.49835	0.694776	1
HP_OLIGODACTYLY	27	0.296885	0.985339	0.482558	0.694499	1
HP_THIN_NAIL	15	0.354843	0.985094	0.477454	0.694647	1
GO_LRR_DOMAIN_BINDING	17	0.333697	0.983877	0.490566	0.697246	1
HP_METAPHYSEAL_CUPPING	14	0.355224	0.983761	0.492925	0.6971	1
GO_COVALENT_CHROMATIN_MODIFICATION	441	0.184979	0.982834	0.648649	0.699015	1
HP_COMBINED_IMMUNODEFICIENCY	19	0.328274	0.982794	0.4625	0.698663	1
HP_BROAD_BASED_GAIT	63	0.243085	0.982611	0.512195	0.698685	1
HP_OVAL_FACE	10	0.390123	0.981707	0.477922	0.70051	1
HP_ABNORMALITY_OF_THE_THYMUS	42	0.263739	0.98141	0.491228	0.700796	1
GO_VITAMIN_TRANSMEMBRANE_TRANSPORT	13	0.36147	0.981368	0.485564	0.700447	1
GO_MITOCHONDRIAL_TRANSLATIONAL_TERMINATION	89	0.227997	0.981156	0.497778	0.700527	1
GO_WNT_SIGNALING_PATHWAY_INVOLVED_IN_HEART_DEVELOPMENT	11	0.395248	0.981054	0.454321	0.700337	1
GO_PRP19_COMPLEX	13	0.357012	0.980804	0.478723	0.700534	1
GO_DNA_TEMPLATED_TRANSCRIPTION_TERMINATION	75	0.233604	0.980719	0.485106	0.700283	1
GO_TRICARBOXYLIC_ACID_METABOLIC_PROCESS	14	0.365293	0.98045	0.490667	0.700502	1
GO_PROTEIN_DEMETHYLASE_ACTIVITY	27	0.30022	0.980234	0.489297	0.700586	1
GO_MITOCHONDRIAL_TRANSMEMBRANE_TRANSPORT	95	0.230664	0.980156	0.497585	0.70034	1
GO_TRANSLATIONAL_TERMINATION	104	0.229515	0.97963	0.50495	0.701225	1
GO_CELLULAR_AMINO_ACID_METABOLIC_PROCESS	287	0.195917	0.97926	0.545455	0.701709	1
GO_REGULATION_OF_RIBOSOME_BIOGENESIS	16	0.340572	0.97909	0.465823	0.701663	1
GO_CELLULAR_RESPONSE_TO_LOW_DENSITY_LIPOPROTEIN_PARTICLE_STIMULUS	17	0.340254	0.97831	0.491848	0.703208	1
GO_PROTEIN_N_TERMINUS_BINDING	102	0.22132	0.978242	0.497462	0.702939	1
GO_UV_DAMAGE_EXCISION_REPAIR	11	0.379227	0.978215	0.513021	0.702564	1
HP_CONGENITAL_NONBULLOUS_ICHTHYOSIFORM_ERYTHRODERMA	11	0.381015	0.978164	0.477612	0.70224	1
GO_LYS63_SPECIFIC_DEUBIQUITINASE_ACTIVITY	12	0.374191	0.977506	0.474359	0.70341	1
GO_REGULATION_OF_EPITHELIAL_CELL_DIFFERENTIATION_INVOLVED_IN_KIDNEY_DEVELOPMENT	16	0.339423	0.977287	0.487738	0.703522	1
GO_NEGATIVE_REGULATION_OF_DOUBLE_STRAND_BREAK_REPAIR_VIA_HOMOLOGOUS_RECOMBINATION	19	0.322624	0.976937	0.5	0.703962	1
GO_REGULATION_OF_PROTEIN_COMPLEX_STABILITY	10	0.386147	0.976033	0.487179	0.705731	1
GO_REGULATION_OF_GOLGI_ORGANIZATION	15	0.341592	0.976001	0.477833	0.705363	1
GO_REGULATION_OF_MICROTUBULE_BASED_MOVEMENT	38	0.271755	0.975191	0.519868	0.706943	1
GO_TRANSCRIPTION_EXPORT_COMPLEX	14	0.355454	0.973545	0.482094	0.710643	1
GO_MULTIVESICULAR_BODY_SORTING_PATHWAY	40	0.270107	0.973476	0.472669	0.710374	1
GO_CIRCADIAN_REGULATION_OF_GENE_EXPRESSION	58	0.248146	0.973453	0.521429	0.709996	1
GO_MICROTUBULE_BASED_TRANSPORT	182	0.205857	0.973352	0.57554	0.709804	1
GO_MITOCHONDRIAL_LARGE_RIBOSOMAL_SUBUNIT	57	0.250776	0.972804	0.488971	0.710733	1
HP_PERIVENTRICULAR_HETEROTOPIA	19	0.327057	0.97237	0.48324	0.711393	1
GO_REGULATION_OF_TRANSCRIPTION_INITIATION_FROM_RNA_POLYMERASE_II_PROMOTER	36	0.279041	0.97214	0.486301	0.711525	1
GO_RNA_POLYMERASE_II_CORE_PROMOTER_SEQUENCE_SPECIFIC_DNA_BINDING	20	0.313611	0.972117	0.463807	0.711135	1
GO_ESCRT_III_COMPLEX	11	0.372308	0.971949	0.466667	0.71109	1
HP_INTELLECTUAL_DISABILITY_SEVERE	314	0.193649	0.971789	0.545455	0.711054	1
GO_LIPOPROTEIN_LOCALIZATION	10	0.372416	0.970754	0.505882	0.713178	1
HP_ABNORMAL_TONGUE_PHYSIOLOGY	34	0.272025	0.97075	0.523026	0.712736	1
HP_HYPERACTIVITY	347	0.19125	0.970414	0.584906	0.713138	1
GO_G_PROTEIN_BETA_GAMMA_SUBUNIT_COMPLEX_BINDING	17	0.330075	0.970304	0.475504	0.712967	1
GO_NEPHRON_TUBULE_FORMATION	13	0.357919	0.970275	0.470443	0.7126	1
GO_GLUCOSE_6_PHOSPHATE_METABOLIC_PROCESS	23	0.30841	0.969861	0.497297	0.713198	1
GO_POSITIVE_REGULATION_OF_NEUROTRANSMITTER_TRANSPORT	27	0.283765	0.969846	0.510638	0.712793	1
GO_HISTONE_METHYLTRANSFERASE_ACTIVITY_H3_K9_SPECIFIC	10	0.388768	0.969204	0.48184	0.713907	1
GO_MALE_SEX_DETERMINATION	10	0.379874	0.968878	0.479419	0.714236	1
GO_AMINO_ACID_CATION_SYMPORTER_ACTIVITY	15	0.339387	0.967973	0.516393	0.716086	1
HP_APLASIA_HYPOPLASIA_INVOLVING_THE_CARPAL_BONES	15	0.357519	0.967952	0.4975	0.71569	1
GO_ALPHA_AMINO_ACID_BIOSYNTHETIC_PROCESS	59	0.246302	0.967866	0.5	0.71545	1
GO_POSITIVE_REGULATION_OF_CHROMOSOME_ORGANIZATION	169	0.207795	0.967491	0.52518	0.71595	1
GO_MAP_KINASE_PHOSPHATASE_ACTIVITY	13	0.343555	0.96722	0.483029	0.716172	1
GO_INTRAMOLECULAR_TRANSFERASE_ACTIVITY_PHOSPHOTRANSFERASES	10	0.388657	0.967042	0.507177	0.716148	1
GO_POSITIVE_REGULATION_OF_FERTILIZATION	10	0.383751	0.966426	0.482587	0.717213	1
HP_ATROPHY_DEGENERATION_AFFECTING_THE_BRAINSTEM	21	0.321123	0.966216	0.494083	0.71729	1
GO_POSITIVE_REGULATION_OF_MEMBRANE_PERMEABILITY	60	0.24497	0.966206	0.524272	0.716872	1
GO_RESPONSE_TO_ACIDIC_PH	20	0.317253	0.965732	0.462428	0.71758	1
GO_CILIARY_MEMBRANE	62	0.244362	0.965276	0.507812	0.718265	1
HP_APLASIA_HYPOPLASIA_OF_THE_STERNUM	15	0.338102	0.964662	0.495845	0.719339	1
GO_PHOSPHATIDYLINOSITOL_DEPHOSPHORYLATION	30	0.27838	0.964618	0.533101	0.718995	1
GO_THIOLESTER_HYDROLASE_ACTIVITY	37	0.272059	0.964529	0.483766	0.718766	1
GO_REGULATION_OF_OXIDATIVE_STRESS_INDUCED_CELL_DEATH	61	0.24395	0.964499	0.504237	0.718398	1
GO_POSITIVE_REGULATION_OF_TRANSCRIPTION_BY_RNA_POLYMERASE_I	20	0.324418	0.96434	0.477876	0.718351	1
GO_SINGLE_STRANDED_DNA_BINDING	109	0.221986	0.964061	0.567839	0.718602	1
GO_REGULATION_OF_SPINDLE_ORGANIZATION	38	0.267323	0.964046	0.523333	0.718185	1
GO_ORGANELLAR_RIBOSOME	87	0.22994	0.963597	0.513513	0.718875	1
GO_NEPHRON_TUBULE_EPITHELIAL_CELL_DIFFERENTIATION	14	0.349036	0.96325	0.473088	0.719272	1
GO_T_CELL_LINEAGE_COMMITMENT	24	0.303126	0.963221	0.492308	0.718894	1
HP_PROMINENT_NASAL_BRIDGE	174	0.206328	0.963075	0.529851	0.718784	1
GO_BONE_TRABECULA_FORMATION	10	0.379113	0.962386	0.513064	0.72005	1
GO_NEURON_DEATH_IN_RESPONSE_TO_OXIDATIVE_STRESS	29	0.2906	0.962352	0.49835	0.719696	1
GO_CIS_GOLGI_NETWORK	58	0.252021	0.962038	0.511628	0.719993	1
GO_MITOCHONDRIAL_PROTEIN_PROCESSING	13	0.356642	0.961985	0.524193	0.719663	1
HP_RICKETS	30	0.280239	0.961731	0.533951	0.71985	1
HP_SLOW_SACCADIC_EYE_MOVEMENTS	23	0.304003	0.961546	0.507246	0.719876	1
GO_PROTEIN_CONTAINING_COMPLEX_LOCALIZATION	274	0.195628	0.961136	0.597826	0.720456	1
GO_LEUCINE_ZIPPER_DOMAIN_BINDING	11	0.369077	0.961066	0.511278	0.720179	1
GO_EXTRINSIC_COMPONENT_OF_MITOCHONDRIAL_INNER_MEMBRANE	13	0.360546	0.960504	0.506562	0.721131	1
GO_POSITIVE_REGULATION_OF_TELOMERE_MAINTENANCE_VIA_TELOMERE_LENGTHENING	36	0.270644	0.960132	0.579505	0.721585	1
HP_ABNORMALITY_OF_VITAMIN_D_METABOLISM	15	0.346051	0.959896	0.496084	0.721729	1
HP_PSEUDOEPIPHYSES	15	0.339503	0.959432	0.48895	0.722399	1
GO_SAGA_TYPE_COMPLEX	27	0.292668	0.959148	0.474474	0.722671	1
GO_SINGLE_FERTILIZATION	98	0.223575	0.957303	0.535	0.726751	1
GO_UBIQUITIN_DEPENDENT_PROTEIN_BINDING	10	0.379129	0.957179	0.513317	0.726625	1
GO_NUCLEOTIDE_SUGAR_TRANSMEMBRANE_TRANSPORTER_ACTIVITY	12	0.361737	0.956779	0.516624	0.727154	1
HP_XEROSTOMIA	49	0.254939	0.95626	0.542751	0.727993	1
HP_NARROW_NOSE	14	0.344299	0.956198	0.508197	0.7277	1
GO_REGULATION_OF_SPINDLE_ASSEMBLY	24	0.298379	0.955781	0.520231	0.728251	1
GO_UBIQUITIN_BINDING	74	0.238244	0.955508	0.554622	0.728454	1
HP_HYPOSMIA	42	0.265309	0.954006	0.57931	0.73174	1
HP_CHRONIC_RHINITIS	12	0.371166	0.95369	0.51938	0.732083	1
HP_DECREASED_LACRIMATION	14	0.346747	0.953194	0.511628	0.732852	1
GO_PROTEIN_LOCALIZATION_TO_MICROTUBULE_ORGANIZING_CENTER	33	0.275985	0.953182	0.514019	0.732436	1
GO_ONE_CARBON_METABOLIC_PROCESS	33	0.270675	0.952919	0.559486	0.732646	1
HP_EPISPADIAS	25	0.295141	0.952666	0.529052	0.732811	1
GO_MAGNESIUM_DEPENDENT_PROTEIN_SERINE_THREONINE_PHOSPHATASE_ACTIVITY	11	0.370011	0.952638	0.506234	0.73243	1
GO_LIPID_DROPLET_ORGANIZATION	25	0.292736	0.952532	0.52381	0.732242	1
GO_MISMATCHED_DNA_BINDING	14	0.333172	0.951977	0.485934	0.733104	1
GO_MHC_CLASS_II_PROTEIN_COMPLEX	11	0.380464	0.951459	0.539726	0.733948	1
GO_REGULATION_OF_HELICASE_ACTIVITY	12	0.35904	0.951077	0.504808	0.734457	1
GO_POSITIVE_REGULATION_OF_EXOCYTOSIS	76	0.229665	0.949772	0.574074	0.737173	1
GO_LIPOPROTEIN_PARTICLE_RECEPTOR_ACTIVITY	14	0.339221	0.949592	0.54054	0.737179	1
GO_MITOCHONDRIAL_TRANSPORT	252	0.192665	0.949266	0.597826	0.737514	1
HP_DYSMETRIC_SACCADES	16	0.333537	0.948898	0.520436	0.73793	1
HP_PULMONARY_HEMORRHAGE	24	0.306215	0.948167	0.52	0.739277	1
HP_METAPHYSEAL_CHONDRODYSPLASIA	10	0.37761	0.947569	0.524038	0.740306	1
HP_FETAL_ULTRASOUND_SOFT_MARKER	76	0.227833	0.947402	0.575	0.740244	1
HP_CATAPLEXY	10	0.378586	0.947283	0.525	0.740072	1
GO_REGULATION_OF_HISTONE_UBIQUITINATION	12	0.358177	0.946813	0.533679	0.740728	1
GO_CORPUS_CALLOSUM_DEVELOPMENT	20	0.305629	0.946554	0.516129	0.740901	1
GO_SYNAPTIC_VESICLE_MATURATION	12	0.349893	0.946294	0.510989	0.741081	1
GO_RESPONSE_TO_LEAD_ION	21	0.298807	0.94468	0.517906	0.744486	1
GO_MAP_KINASE_KINASE_KINASE_ACTIVITY	23	0.29689	0.944375	0.544413	0.744756	1
GO_LACTATE_METABOLIC_PROCESS	14	0.336521	0.943801	0.557292	0.745665	1
GO_SIGNAL_RECOGNITION_PARTICLE	14	0.334366	0.943197	0.548128	0.746725	1
GO_UBIQUITIN_LIKE_MODIFIER_ACTIVATING_ENZYME_ACTIVITY	10	0.372061	0.943024	0.494819	0.746678	1
HP_INTERRUPTED_AORTIC_ARCH	14	0.343223	0.942991	0.543956	0.746307	1
HP_PROTUBERANT_ABDOMEN	22	0.302252	0.942896	0.556497	0.7461	1
GO_SEH1_ASSOCIATED_COMPLEX	17	0.322916	0.942243	0.523288	0.747166	1
GO_APICOLATERAL_PLASMA_MEMBRANE	16	0.329855	0.94179	0.544199	0.747839	1
HP_ABNORMAL_BRAIN_POSITRON_EMISSION_TOMOGRAPHY	28	0.284344	0.941646	0.551821	0.747733	1
GO_MIRNA_METABOLIC_PROCESS	28	0.284578	0.940879	0.563953	0.749108	1
GO_HSP90_PROTEIN_BINDING	40	0.258197	0.940108	0.57329	0.750436	1
GO_REGULATION_OF_MRNA_METABOLIC_PROCESS	315	0.18727	0.939341	0.72	0.751819	1
GO_IRES_DEPENDENT_VIRAL_TRANSLATIONAL_INITIATION	10	0.383563	0.939103	0.501253	0.751944	1
GO_NLRP3_INFLAMMASOME_COMPLEX_ASSEMBLY	15	0.332196	0.938275	0.538028	0.753475	1
HP_CONGENITAL_HEPATIC_FIBROSIS	44	0.249177	0.937801	0.577703	0.754166	1
GO_TELOMERE_MAINTENANCE_IN_RESPONSE_TO_DNA_DAMAGE	13	0.344909	0.937425	0.554688	0.75462	1
HP_DECREASED_NUMBER_OF_PERIPHERAL_MYELINATED_NERVE_FIBERS	40	0.258877	0.937277	0.613636	0.754533	1
GO_PHOSPHATIDYLINOSITOL_BIOSYNTHETIC_PROCESS	109	0.214191	0.937202	0.666667	0.754276	1
HP_ABNORMAL_URINE_CARBOHYDRATE_LEVEL	28	0.279636	0.936969	0.546584	0.754377	1
GO_CYTOPLASMIC_PATTERN_RECOGNITION_RECEPTOR_SIGNALING_PATHWAY_IN_RESPONSE_TO_VIRUS	29	0.279781	0.936692	0.555556	0.754579	1
HP_APNEIC_EPISODES_PRECIPITATED_BY_ILLNESS_FATIGUE_STRESS	10	0.385131	0.93661	0.544601	0.754341	1
GO_MITOCHONDRIAL_DEPOLARIZATION	22	0.293504	0.936277	0.514881	0.75472	1
GO_TRANSCRIPTION_INITIATION_FROM_RNA_POLYMERASE_I_PROMOTER	38	0.261239	0.936248	0.55082	0.754334	1
GO_NUCLEAR_EXPORT_SIGNAL_RECEPTOR_ACTIVITY	10	0.372969	0.935927	0.533499	0.754649	1
HP_POLYMICROGYRIA	169	0.197818	0.935898	0.680272	0.754263	1
GO_SPHINGOSINE_BIOSYNTHETIC_PROCESS	14	0.335719	0.935846	0.511873	0.753955	1
HP_ABNORMAL_GLOBUS_PALLIDUS_MORPHOLOGY	10	0.372568	0.935476	0.534704	0.754386	1
HP_HYPERSOMNIA	13	0.347116	0.935395	0.552764	0.754106	1
GO_MAMMARY_GLAND_EPITHELIAL_CELL_PROLIFERATION	27	0.286783	0.9344	0.55	0.756045	1
HP_APLASIA_HYPOPLASIA_OF_THE_PATELLA	29	0.281341	0.934319	0.565349	0.755786	1
GO_RRNA_BINDING	64	0.231545	0.934288	0.596429	0.755406	1
GO_H4_HISTONE_ACETYLTRANSFERASE_ACTIVITY	17	0.319207	0.934208	0.534946	0.755136	1
GO_RNA_CATABOLIC_PROCESS	392	0.181684	0.934172	0.808511	0.754771	1
GO_POSITIVE_REGULATION_OF_TELOMERASE_RNA_LOCALIZATION_TO_CAJAL_BODY	15	0.327146	0.933079	0.572973	0.756923	1
HP_CONGENITAL_MALFORMATION_OF_THE_RIGHT_HEART	26	0.290865	0.931894	0.537313	0.7593	1
GO_DETECTION_OF_MOLECULE_OF_BACTERIAL_ORIGIN	10	0.368966	0.931707	0.531335	0.759286	1
GO_POSITIVE_REGULATION_OF_HISTONE_METHYLATION	36	0.263756	0.931414	0.557632	0.759532	1
GO_NEGATIVE_REGULATION_OF_TELOMERASE_ACTIVITY	10	0.37356	0.931394	0.522613	0.759138	1
GO_DNA_REPLICATION_INITIATION	38	0.263007	0.931253	0.582317	0.759039	1
GO_BASIC_AMINO_ACID_TRANSPORT	13	0.349347	0.930998	0.549598	0.759174	1
GO_NEGATIVE_REGULATION_OF_ALCOHOL_BIOSYNTHETIC_PROCESS	13	0.346629	0.930594	0.523002	0.759677	1
GO_HOMEOSTASIS_OF_NUMBER_OF_CELLS_WITHIN_A_TISSUE	26	0.287305	0.930465	0.589506	0.759554	1
GO_REGULATION_OF_FEEDING_BEHAVIOR	13	0.34565	0.929997	0.558583	0.76021	1
GO_RNA_DEPENDENT_DNA_BIOSYNTHETIC_PROCESS	67	0.232325	0.929986	0.658537	0.759794	1
GO_DNA_DEPENDENT_DNA_REPLICATION	150	0.20197	0.929323	0.698795	0.760898	1
GO_NUCLEOTIDASE_ACTIVITY	11	0.364988	0.928918	0.534286	0.761432	1
GO_GLYCEROL_ETHER_METABOLIC_PROCESS	19	0.307265	0.928705	0.572727	0.761481	1
HP_GLIOSIS	81	0.223758	0.928546	0.604255	0.761393	1
HP_ABNORMALITY_OF_MACULAR_PIGMENTATION	37	0.257697	0.927868	0.575758	0.762553	1
GO_NOTCH_BINDING	22	0.299464	0.927632	0.567123	0.762645	1
GO_TELOMERE_CAP_COMPLEX	11	0.363711	0.927548	0.538095	0.762388	1
GO_POSITIVE_REGULATION_OF_MRNA_PROCESSING	27	0.2815	0.927387	0.510029	0.762333	1
GO_INTRINSIC_APOPTOTIC_SIGNALING_PATHWAY_IN_RESPONSE_TO_OXIDATIVE_STRESS	41	0.251141	0.926147	0.604167	0.7648	1
HP_FAIR_HAIR	11	0.360789	0.925923	0.560914	0.764859	1
GO_REGULATION_OF_ESTABLISHMENT_OF_PROTEIN_LOCALIZATION_TO_MITOCHONDRION	70	0.231071	0.925353	0.599138	0.765719	1
GO_NEURONAL_ION_CHANNEL_CLUSTERING	11	0.362727	0.924952	0.562025	0.766241	1
GO_PROTON_TRANSPORTING_TWO_SECTOR_ATPASE_COMPLEX_CATALYTIC_DOMAIN	18	0.305098	0.924933	0.561538	0.765847	1
GO_NEGATIVE_REGULATION_OF_PROTEASOMAL_UBIQUITIN_DEPENDENT_PROTEIN_CATABOLIC_PROCESS	34	0.262802	0.924919	0.582353	0.765435	1
HP_FOCAL_WHITE_MATTER_LESIONS	11	0.347962	0.924894	0.568922	0.765047	1
GO_DNA_METHYLATION	61	0.233272	0.924792	0.641732	0.76485	1
GO_REGULATION_OF_TAU_PROTEIN_KINASE_ACTIVITY	11	0.359485	0.924297	0.552826	0.765545	1
GO_SHORT_CHAIN_FATTY_ACID_METABOLIC_PROCESS	15	0.330318	0.92372	0.565789	0.766444	1
GO_RETINA_LAYER_FORMATION	18	0.31074	0.922845	0.561828	0.768003	1
HP_OBSESSIVE_COMPULSIVE_BEHAVIOR	80	0.222713	0.9226	0.623377	0.768104	1
HP_WRITER_S_CRAMP	15	0.321427	0.92191	0.573892	0.769233	1
GO_EMBRYONIC_SKELETAL_JOINT_DEVELOPMENT	12	0.345417	0.921867	0.577017	0.768882	1
GO_NUCLEOTIDE_EXCISION_REPAIR_DNA_GAP_FILLING	23	0.285507	0.921715	0.565982	0.768798	1
GO_POSITIVE_REGULATION_OF_INTRACELLULAR_ESTROGEN_RECEPTOR_SIGNALING_PATHWAY	11	0.36181	0.921394	0.552058	0.769137	1
GO_WASH_COMPLEX	12	0.341759	0.920766	0.571072	0.770139	1
GO_REGULATION_OF_MESODERM_DEVELOPMENT	13	0.34151	0.919729	0.562814	0.772107	1
HP_HYPOPLASIA_OF_THE_PONS	35	0.259758	0.919568	0.608151	0.772045	1
GO_POSITIVE_REGULATION_OF_ESTABLISHMENT_OF_PROTEIN_LOCALIZATION_TO_MITOCHONDRION	56	0.234972	0.919059	0.608527	0.772806	1
GO_L_AMINO_ACID_TRANSPORT	56	0.239287	0.918987	0.635659	0.772534	1
GO_LUNG_CELL_DIFFERENTIATION	18	0.317705	0.918907	0.57958	0.772278	1
GO_LYSOSOMAL_TRANSPORT	104	0.208532	0.918901	0.675258	0.771848	1
HP_ZONULAR_CATARACT	22	0.292612	0.918503	0.595687	0.772314	1
GO_NEGATIVE_REGULATION_OF_DNA_REPLICATION	32	0.269845	0.91846	0.589342	0.771951	1
HP_OCULAR_ALBINISM	18	0.313067	0.918069	0.613445	0.77245	1
GO_REGULATION_OF_GENE_SILENCING	93	0.214924	0.917909	0.670103	0.772378	1
GO_NUCLEAR_INCLUSION_BODY	12	0.352948	0.917774	0.568681	0.772237	1
GO_ATPASE_COMPLEX	75	0.224068	0.917717	0.661157	0.771922	1
GO_REGULATION_OF_CHROMATIN_ASSEMBLY	18	0.304127	0.915646	0.572222	0.776169	1
GO_GLUTAMATE_METABOLIC_PROCESS	27	0.271845	0.915383	0.600694	0.77631	1
GO_LATERAL_ELEMENT	12	0.355956	0.914802	0.587952	0.77716	1
GO_VESICLE_COAT	54	0.240314	0.914784	0.628821	0.77675	1
GO_REGULATION_OF_NUCLEOBASE_CONTAINING_COMPOUND_TRANSPORT	18	0.305818	0.91424	0.604278	0.777551	1
GO_RNA_SPLICING_VIA_ENDONUCLEOLYTIC_CLEAVAGE_AND_LIGATION	16	0.31914	0.91395	0.572581	0.777745	1
HP_LARYNGOSPASM	40	0.254301	0.912543	0.647059	0.78048	1
GO_NEGATIVE_REGULATION_OF_LIPID_CATABOLIC_PROCESS	19	0.312506	0.912193	0.595166	0.780811	1
GO_PERICARDIUM_DEVELOPMENT	16	0.314287	0.912105	0.598945	0.780551	1
GO_NEGATIVE_REGULATION_OF_MITOCHONDRION_ORGANIZATION	57	0.232926	0.911358	0.653137	0.781784	1
HP_GENERALIZED_HYPOPIGMENTATION	29	0.27702	0.911049	0.605769	0.782034	1
GO_RAB_PROTEIN_SIGNAL_TRANSDUCTION	20	0.295665	0.910483	0.589286	0.782894	1
GO_POSITIVE_REGULATION_OF_PROTEIN_KINASE_C_SIGNALING	10	0.366384	0.910453	0.5625	0.782517	1
GO_LIPOXYGENASE_PATHWAY	12	0.347716	0.908665	0.577889	0.786122	1
GO_SERINE_FAMILY_AMINO_ACID_BIOSYNTHETIC_PROCESS	17	0.309244	0.907475	0.554286	0.788346	1
GO_RESPONSE_TO_MUSCLE_ACTIVITY	21	0.304503	0.907296	0.605797	0.788304	1
HP_SPINAL_MUSCULAR_ATROPHY	22	0.285903	0.906278	0.615385	0.790195	1
HP_INAPPROPRIATE_BEHAVIOR	32	0.261439	0.90589	0.632653	0.79065	1
GO_ACETYL_COA_BIOSYNTHETIC_PROCESS	21	0.292114	0.905103	0.611413	0.791958	1
HP_RAPIDLY_PROGRESSIVE	35	0.256133	0.90478	0.63245	0.792239	1
GO_DNA_DEPENDENT_DNA_REPLICATION_MAINTENANCE_OF_FIDELITY	44	0.244184	0.904451	0.644068	0.792503	1
GO_SCF_UBIQUITIN_LIGASE_COMPLEX	62	0.225124	0.904178	0.679167	0.792663	1
GO_CARDIAC_CELL_FATE_COMMITMENT	11	0.360988	0.903444	0.578512	0.793822	1
GO_UBIQUITINATION_LIKE_MODIFICATION_DEPENDENT_PROTEIN_BINDING	12	0.337649	0.903206	0.596306	0.79389	1
GO_HISTONE_H2A_ACETYLATION	17	0.304274	0.903192	0.609971	0.793471	1
GO_RNA_POLYMERASE_ACTIVITY	41	0.255116	0.902357	0.631579	0.794871	1
GO_REGULATION_OF_TRANSCRIPTION_REGULATORY_REGION_DNA_BINDING	44	0.243578	0.902198	0.637363	0.794787	1
HP_URINARY_BLADDER_SPHINCTER_DYSFUNCTION	27	0.274115	0.902112	0.665768	0.794545	1
HP_SHORT_UPPER_LIP	12	0.343769	0.901909	0.579515	0.794552	1
GO_PROTEIN_TYROSINE_SERINE_THREONINE_PHOSPHATASE_ACTIVITY	38	0.256357	0.900791	0.613636	0.796587	1
GO_METHYLOSOME	12	0.335076	0.900648	0.590476	0.796433	1
HP_WIDELY_SPACED_TEETH	60	0.232636	0.900483	0.671533	0.796339	1
GO_NEGATIVE_REGULATION_OF_POSTTRANSCRIPTIONAL_GENE_SILENCING	18	0.302758	0.900149	0.580381	0.796647	1
HP_PROGRESSIVE_PSYCHOMOTOR_DETERIORATION	10	0.362093	0.89969	0.589873	0.797217	1
GO_NUCLEOTIDE_EXCISION_REPAIR_COMPLEX	12	0.329969	0.898615	0.572839	0.799162	1
GO_PEPTIDYL_SERINE_DEPHOSPHORYLATION	19	0.299278	0.898611	0.587692	0.798723	1
HP_METABOLIC_ACIDOSIS	120	0.197294	0.898591	0.756757	0.798318	1
GO_POSITIVE_REGULATION_OF_SYNAPTIC_VESICLE_EXOCYTOSIS	12	0.33777	0.898138	0.591398	0.798866	1
GO_PEPTIDE_ANTIGEN_BINDING	23	0.28136	0.898121	0.607362	0.798457	1
GO_PROTEIN_PHOSPHATASE_2A_BINDING	28	0.269654	0.897378	0.604502	0.799593	1
GO_REGULATION_OF_MITOCHONDRIAL_MEMBRANE_PERMEABILITY_INVOLVED_IN_APOPTOTIC_PROCESS	59	0.230947	0.897214	0.660714	0.799496	1
GO_POSITIVE_REGULATION_OF_KERATINOCYTE_DIFFERENTIATION	14	0.327682	0.897106	0.581522	0.799281	1
GO_MHC_CLASS_II_BIOSYNTHETIC_PROCESS	14	0.327413	0.897	0.611732	0.79906	1
HP_CHERRY_RED_SPOT_OF_THE_MACULA	11	0.344569	0.896286	0.593674	0.800218	1
GO_POSITIVE_REGULATION_OF_MAST_CELL_ACTIVATION_INVOLVED_IN_IMMUNE_RESPONSE	11	0.348697	0.895924	0.595745	0.800528	1
HP_ENLARGED_OVARIES	17	0.302784	0.895821	0.578249	0.800291	1
GO_ESTABLISHMENT_OR_MAINTENANCE_OF_MONOPOLAR_CELL_POLARITY	19	0.293734	0.895171	0.635568	0.801221	1
HP_ESOPHAGEAL_ATRESIA	19	0.294392	0.895065	0.616667	0.801001	1
HP_HYPOPLASIA_OF_THE_UTERUS	33	0.256656	0.894044	0.631902	0.802749	1
GO_CATECHOLAMINE_BIOSYNTHETIC_PROCESS	13	0.32105	0.893736	0.604878	0.802974	1
HP_EXTRAPYRAMIDAL_MUSCULAR_RIGIDITY	13	0.333995	0.893257	0.61008	0.803587	1
HP_TRICUSPID_ATRESIA	10	0.361196	0.891947	0.592771	0.805943	1
GO_MACROPHAGE_APOPTOTIC_PROCESS	10	0.355153	0.890559	0.587013	0.808458	1
GO_NEGATIVE_REGULATION_OF_CELLULAR_AMIDE_METABOLIC_PROCESS	154	0.192513	0.890194	0.789474	0.808802	1
HP_FACIAL_HEMANGIOMA	15	0.328389	0.890119	0.603825	0.808515	1
GO_NEGATIVE_REGULATION_OF_HISTONE_H3_K9_METHYLATION	10	0.354966	0.889692	0.594872	0.808998	1
HP_ERYTHRODERMA	35	0.254496	0.889661	0.64127	0.808618	1
GO_NAD_DEPENDENT_PROTEIN_DEACETYLASE_ACTIVITY	16	0.310432	0.889316	0.609255	0.808937	1
HP_FRECKLING	40	0.249527	0.888599	0.653731	0.809998	1
GO_CARBON_NITROGEN_LIGASE_ACTIVITY_WITH_GLUTAMINE_AS_AMIDO_N_DONOR	10	0.351581	0.887626	0.587678	0.811652	1
GO_RNA_DESTABILIZATION	33	0.255123	0.887435	0.639871	0.81163	1
GO_POSITIVE_REGULATION_OF_DNA_RECOMBINATION	40	0.241434	0.887391	0.685714	0.811283	1
GO_LEFT_RIGHT_PATTERN_FORMATION	21	0.283236	0.887097	0.621849	0.811475	1
HP_ALLERGY	19	0.296554	0.88626	0.598931	0.812807	1
GO_NEGATIVE_REGULATION_OF_INTERLEUKIN_8_PRODUCTION	20	0.292414	0.886099	0.609687	0.812701	1
HP_ABNORMAL_MONOCYTE_MORPHOLOGY	10	0.354303	0.885523	0.604113	0.813423	1
GO_PYRIMIDINE_NUCLEOSIDE_MONOPHOSPHATE_METABOLIC_PROCESS	14	0.324497	0.885256	0.591892	0.813544	1
HP_FLAT_OCCIPUT	42	0.244574	0.883289	0.646853	0.817292	1
GO_PROTEIN_LOCALIZATION_TO_MITOCHONDRION	138	0.1916	0.882012	0.814815	0.819554	1
GO_ENDONUCLEASE_COMPLEX	35	0.254837	0.881936	0.657051	0.819273	1
HP_SEVERE_MUSCULAR_HYPOTONIA	66	0.219092	0.881909	0.716049	0.818892	1
HP_HYPOPIGMENTED_MACULE	11	0.351099	0.881822	0.644068	0.818631	1
HP_ATOPIC_DERMATITIS	11	0.341584	0.881405	0.59799	0.819065	1
GO_REGULATION_OF_AUTOPHAGY_OF_MITOCHONDRION	43	0.238016	0.881065	0.669065	0.819323	1
HP_ABNORMALITY_OF_RENAL_RESORPTION	17	0.304096	0.880003	0.587258	0.821095	1
HP_VAGINAL_FISTULA	23	0.277144	0.879957	0.676647	0.820732	1
HP_SHOULDER_GIRDLE_MUSCLE_WEAKNESS	36	0.246696	0.879466	0.697987	0.821298	1
GO_NEUTRAL_AMINO_ACID_TRANSPORT	36	0.244243	0.878813	0.69697	0.822208	1
GO_NEGATIVE_REGULATION_OF_TELOMERE_MAINTENANCE	35	0.249303	0.878298	0.655488	0.822853	1
GO_LOW_DENSITY_LIPOPROTEIN_RECEPTOR_PARTICLE_METABOLIC_PROCESS	22	0.281708	0.878149	0.63253	0.82272	1
HP_HEMIMEGALENCEPHALY	10	0.356678	0.877663	0.619512	0.823318	1
GO_TRAPP_COMPLEX	15	0.310971	0.877457	0.616368	0.823294	1
GO_TETRAHYDROFOLATE_METABOLIC_PROCESS	18	0.294805	0.877388	0.650794	0.822993	1
HP_CONSTRICTION_OF_PERIPHERAL_VISUAL_FIELD	61	0.223553	0.876126	0.735772	0.825213	1
GO_REGULATION_OF_DNA_TEMPLATED_TRANSCRIPTION_INITIATION	44	0.240463	0.875858	0.689531	0.825314	1
GO_PYRIMIDINE_CONTAINING_COMPOUND_TRANSMEMBRANE_TRANSPORT	10	0.359634	0.875797	0.601626	0.824988	1
HP_ABNORMALITY_OF_SMALL_INTESTINAL_VILLUS_MORPHOLOGY	18	0.299754	0.874833	0.644809	0.826515	1
GO_S_ACYLTRANSFERASE_ACTIVITY	30	0.258681	0.87422	0.705128	0.827333	1
HP_LARGE_FOR_GESTATIONAL_AGE	31	0.255388	0.873925	0.682848	0.827497	1
GO_REGULATION_OF_CHROMATIN_ASSEMBLY_OR_DISASSEMBLY	22	0.274998	0.873203	0.688022	0.828539	1
GO_AMIDE_BIOSYNTHETIC_PROCESS	764	0.166791	0.872184	1	0.830195	1
GO_MRNA_SPLICE_SITE_SELECTION	35	0.250426	0.871556	0.704545	0.831031	1
HP_MIDLINE_DEFECT_OF_THE_NOSE	11	0.334272	0.871273	0.631148	0.831182	1
GO_ACETYL_COA_BIOSYNTHETIC_PROCESS_FROM_PYRUVATE	15	0.303541	0.870757	0.656891	0.831776	1
GO_POSITIVE_REGULATION_OF_HISTONE_H3_K4_METHYLATION	16	0.308362	0.870511	0.656757	0.831805	1
GO_ENDORIBONUCLEASE_ACTIVITY_PRODUCING_5_PHOSPHOMONOESTERS	28	0.263011	0.870369	0.679758	0.831662	1
GO_SIGNAL_SEQUENCE_BINDING	45	0.23115	0.870262	0.700997	0.831436	1
GO_G_PROTEIN_COUPLED_GLUTAMATE_RECEPTOR_BINDING	11	0.334879	0.870031	0.626984	0.831441	1
GO_PURINE_NUCLEOSIDE_MONOPHOSPHATE_BIOSYNTHETIC_PROCESS	19	0.289619	0.86957	0.655786	0.831926	1
HP_HYPERACTIVE_PATELLAR_REFLEX	12	0.333449	0.869219	0.607235	0.832168	1
GO_MISMATCH_REPAIR	33	0.245215	0.868563	0.696078	0.833043	1
GO_NEGATIVE_REGULATION_OF_UBIQUITIN_DEPENDENT_PROTEIN_CATABOLIC_PROCESS	46	0.229314	0.868398	0.749077	0.832931	1
GO_INTERLEUKIN_1_MEDIATED_SIGNALING_PATHWAY	99	0.198668	0.868154	0.759162	0.832987	1
HP_EEG_WITH_FOCAL_EPILEPTIFORM_DISCHARGES	84	0.208055	0.867828	0.780374	0.833163	1
GO_LONG_CHAIN_FATTY_ACYL_COA_BIOSYNTHETIC_PROCESS	18	0.293697	0.866273	0.627119	0.835879	1
GO_POSITIVE_REGULATION_OF_CALCIUM_ION_DEPENDENT_EXOCYTOSIS	15	0.311623	0.866207	0.632979	0.835565	1
HP_DILATION_OF_LATERAL_VENTRICLES	24	0.268061	0.866126	0.671642	0.835276	1
GO_ISWI_TYPE_COMPLEX	11	0.334	0.865478	0.624402	0.836133	1
GO_POSITIVE_REGULATION_OF_MEMBRANE_POTENTIAL	14	0.317342	0.865454	0.651042	0.835725	1
GO_REGULATION_OF_LOW_DENSITY_LIPOPROTEIN_PARTICLE_CLEARANCE	11	0.338435	0.865177	0.617284	0.835824	1
GO_DISULFIDE_OXIDOREDUCTASE_ACTIVITY	39	0.248508	0.864294	0.723404	0.837137	1
GO_RESPONSE_TO_HYDROPEROXIDE	17	0.295068	0.864272	0.656757	0.836727	1
HP_IMPAIRED_T_CELL_FUNCTION	21	0.275503	0.863778	0.660661	0.837272	1
GO_HAIR_FOLLICLE_MATURATION	16	0.304165	0.862146	0.645777	0.840046	1
HP_CLUMSINESS	45	0.232754	0.861284	0.744479	0.8413	1
GO_HISTONE_H4_DEACETYLATION	11	0.334848	0.861104	0.64631	0.841216	1
GO_CELLULAR_RESPONSE_TO_X_RAY	11	0.332609	0.86108	0.642857	0.840812	1
GO_REGULATION_OF_NUCLEAR_TRANSCRIBED_MRNA_POLY_A_TAIL_SHORTENING	14	0.315302	0.860677	0.64557	0.841165	1
GO_REGULATION_OF_PROTEIN_ACETYLATION	68	0.213077	0.859828	0.790076	0.842357	1
GO_ALDITOL_NADPPLUS_1_OXIDOREDUCTASE_ACTIVITY	10	0.338968	0.859782	0.615385	0.841997	1
GO_TRANSLATION_INITIATION_FACTOR_BINDING	31	0.250682	0.859685	0.723603	0.841729	1
HP_MACROCYTIC_ANEMIA	47	0.228998	0.858993	0.732394	0.842615	1
GO_TELOMERE_MAINTENANCE_VIA_TELOMERE_LENGTHENING	76	0.207033	0.858929	0.737288	0.842288	1
GO_CERAMIDE_BINDING	13	0.322313	0.858479	0.653543	0.842715	1
GO_CHROMATOID_BODY	11	0.339285	0.855704	0.638243	0.847673	1
GO_PRC1_COMPLEX	15	0.304312	0.855505	0.650888	0.847624	1
GO_NEGATIVE_REGULATION_OF_RESPONSE_TO_OXIDATIVE_STRESS	45	0.230051	0.854318	0.731544	0.84947	1
GO_PEPTIDYL_LYSINE_DIMETHYLATION	22	0.277864	0.853668	0.664706	0.850261	1
HP_MALE_PSEUDOHERMAPHRODITISM	33	0.245156	0.85304	0.70684	0.850963	1
GO_GOLGI_TO_VACUOLE_TRANSPORT	17	0.286336	0.852349	0.661972	0.851846	1
GO_LOW_DENSITY_LIPOPROTEIN_PARTICLE_RECEPTOR_ACTIVITY	12	0.333803	0.852102	0.643617	0.851836	1
GO_ALDITOL_METABOLIC_PROCESS	23	0.2749	0.851522	0.706044	0.852486	1
GO_ANDROGEN_METABOLIC_PROCESS	22	0.271845	0.851373	0.696023	0.852334	1
GO_POSITIVE_REGULATION_OF_CYTOPLASMIC_TRANSLATION	11	0.332829	0.851268	0.666667	0.85209	1
GO_NLS_BEARING_PROTEIN_IMPORT_INTO_NUCLEUS	16	0.30135	0.851185	0.684211	0.851786	1
HP_VOLVULUS	12	0.317374	0.850912	0.651948	0.851846	1
HP_SHIELD_CHEST	10	0.34231	0.850697	0.654206	0.851789	1
HP_SCROTAL_HYPOPLASIA	45	0.234171	0.850606	0.72963	0.851499	1
GO_SEQUESTERING_OF_TRIGLYCERIDE	14	0.298248	0.850596	0.670077	0.851066	1
GO_PROTEIN_HETEROOLIGOMERIZATION	20	0.274721	0.850183	0.65928	0.851432	1
HP_ABNORMAL_CIRCULATING_METHIONINE_CONCENTRATION	12	0.326062	0.850171	0.645	0.851001	1
GO_COENZYME_A_BIOSYNTHETIC_PROCESS	10	0.331492	0.850051	0.654321	0.850785	1
GO_HISTONE_H2A_UBIQUITINATION	26	0.260423	0.849949	0.697406	0.850525	1
HP_ABNORMALITY_OF_OCULAR_SMOOTH_PURSUIT	52	0.217161	0.84909	0.776557	0.851701	1
GO_UBIQUITIN_LIKE_PROTEIN_BINDING	92	0.20149	0.848137	0.8125	0.853056	1
GO_COPPER_ION_TRANSPORT	17	0.298047	0.847953	0.684848	0.852948	1
GO_DYNACTIN_BINDING	12	0.314638	0.8478	0.651226	0.85279	1
GO_PYRIMIDINE_NUCLEOTIDE_CATABOLIC_PROCESS	13	0.313911	0.847641	0.665761	0.852645	1
GO_RIBONUCLEOSIDE_MONOPHOSPHATE_BIOSYNTHETIC_PROCESS	29	0.244107	0.847572	0.686709	0.852312	1
GO_NEGATIVE_REGULATION_OF_MULTICELLULAR_ORGANISM_GROWTH	10	0.337207	0.847445	0.661137	0.852105	1
GO_REGULATION_OF_DOUBLE_STRAND_BREAK_REPAIR_VIA_HOMOLOGOUS_RECOMBINATION	47	0.228318	0.8473	0.713287	0.851928	1
GO_GOLGI_CIS_CISTERNA	20	0.277649	0.847007	0.694915	0.852032	1
HP_RECURRENT_SINOPULMONARY_INFECTIONS	14	0.304434	0.846945	0.674359	0.851708	1
HP_ABNORMALITY_OF_METACARPAL_EPIPHYSES	11	0.330105	0.845866	0.637602	0.853261	1
GO_CD8_POSITIVE_ALPHA_BETA_T_CELL_DIFFERENTIATION	13	0.309987	0.845594	0.660526	0.853332	1
GO_LONG_CHAIN_FATTY_ACID_COA_LIGASE_ACTIVITY	11	0.325773	0.844037	0.682415	0.855823	1
GO_PATTERN_RECOGNITION_RECEPTOR_ACTIVITY	16	0.295594	0.843787	0.674863	0.855845	1
GO_MATING_BEHAVIOR	19	0.273914	0.842681	0.72067	0.857425	1
GO_CELL_CELL_RECOGNITION	57	0.216638	0.842153	0.782443	0.857938	1
GO_RRNA_3_END_PROCESSING	10	0.332006	0.84194	0.671642	0.857884	1
HP_EVERTED_UPPER_LIP_VERMILION	12	0.324466	0.841817	0.667506	0.857645	1
GO_ASTRAL_MICROTUBULE_ORGANIZATION	10	0.335278	0.841699	0.647208	0.857405	1
HP_ABNORMAL_CIRCULATING_ASPARTATE_FAMILY_AMINO_ACID_CONCENTRATION	16	0.297397	0.84148	0.673913	0.857373	1
GO_INOSITOL_METABOLIC_PROCESS	11	0.325929	0.841006	0.668394	0.857747	1
GO_RESPONSE_TO_EPINEPHRINE	11	0.33064	0.840894	0.642105	0.857517	1
GO_PRESPLICEOSOME	17	0.282987	0.840876	0.693671	0.857105	1
GO_REGULATION_OF_VIRAL_TRANSCRIPTION	62	0.214234	0.840483	0.78	0.857355	1
HP_HYPERAMMONEMIA	45	0.22371	0.839738	0.766323	0.858246	1
GO_REGULATION_OF_TELOMERE_MAINTENANCE	78	0.200017	0.839046	0.829493	0.859077	1
GO_POSITIVE_REGULATION_OF_INTRACELLULAR_STEROID_HORMONE_RECEPTOR_SIGNALING_PATHWAY	13	0.309069	0.83811	0.663979	0.86037	1
GO_PHOSPHOLIPID_TRANSFER_ACTIVITY	20	0.277629	0.837923	0.676301	0.860288	1
GO_POSITIVE_REGULATION_OF_CAMP_MEDIATED_SIGNALING	11	0.329099	0.8376	0.664216	0.860411	1
GO_REGULATION_OF_HISTONE_H3_K4_METHYLATION	26	0.264638	0.836663	0.710914	0.861656	1
HP_ABNORMAL_CERVICAL_SPINE_MORPHOLOGY	11	0.328363	0.836454	0.721649	0.861602	1
GO_SMOOTHENED_SIGNALING_PATHWAY_INVOLVED_IN_DORSAL_VENTRAL_NEURAL_TUBE_PATTERNING	14	0.3042	0.835848	0.664835	0.862238	1
GO_REGULATION_OF_ARP2_3_COMPLEX_MEDIATED_ACTIN_NUCLEATION	20	0.27806	0.83533	0.731092	0.862731	1
GO_NEGATIVE_REGULATION_OF_RECEPTOR_INTERNALIZATION	12	0.318246	0.835038	0.665829	0.862796	1
GO_PROTEIN_DESTABILIZATION	49	0.224461	0.834122	0.803774	0.863961	1
HP_MEDIAN_CLEFT_PALATE	13	0.303741	0.833916	0.68306	0.863883	1
GO_ETHER_METABOLIC_PROCESS	24	0.265256	0.833687	0.704142	0.863838	1
GO_RAN_GTPASE_BINDING	38	0.239967	0.832878	0.770909	0.864831	1
GO_SPERMATID_NUCLEUS_DIFFERENTIATION	18	0.284828	0.832876	0.698701	0.864386	1
GO_PROMOTER_SPECIFIC_CHROMATIN_BINDING	51	0.215518	0.832175	0.775168	0.86519	1
GO_PHOSPHOLIPASE_A2_ACTIVITY	16	0.286168	0.831828	0.697479	0.865358	1
GO_MITOCHONDRIAL_CALCIUM_ION_TRANSMEMBRANE_TRANSPORT	24	0.258561	0.831745	0.731778	0.865054	1
GO_NEGATIVE_REGULATION_OF_TELOMERE_MAINTENANCE_VIA_TELOMERE_LENGTHENING	26	0.250224	0.831634	0.735736	0.864779	1
HP_BROAD_NECK	19	0.274746	0.831014	0.705882	0.865461	1
GO_TRANSLATION_REPRESSOR_ACTIVITY_MRNA_REGULATORY_ELEMENT_BINDING	14	0.297736	0.830911	0.678873	0.865197	1
GO_ESTROGEN_BIOSYNTHETIC_PROCESS	10	0.328491	0.830799	0.651948	0.864941	1
GO_REGULATION_OF_GRANULOCYTE_DIFFERENTIATION	12	0.314167	0.830798	0.68408	0.864496	1
HP_FOCAL_MYOCLONIC_SEIZURE	13	0.314756	0.830635	0.722513	0.864342	1
GO_T_CELL_CHEMOTAXIS	17	0.285694	0.8306	0.722071	0.863952	1
GO_MITOCHONDRIAL_SMALL_RIBOSOMAL_SUBUNIT	28	0.246492	0.830217	0.72293	0.864183	1
GO_PHOTORECEPTOR_INNER_SEGMENT	42	0.226622	0.829655	0.766667	0.864706	1
GO_RESPONSE_TO_X_RAY	30	0.248081	0.829615	0.742138	0.864329	1
GO_PROTEIN_SUMOYLATION	73	0.209733	0.829403	0.818966	0.864239	1
HP_METATARSUS_ADDUCTUS	36	0.234714	0.828996	0.789644	0.864546	1
GO_MONOACYLGLYCEROL_METABOLIC_PROCESS	12	0.318159	0.828538	0.694301	0.864877	1
GO_3_5_DNA_HELICASE_ACTIVITY	19	0.276624	0.827924	0.704142	0.865512	1
GO_TRANSCRIPTION_FACTOR_TFTC_COMPLEX	14	0.303004	0.826927	0.705736	0.866819	1
HP_DIFFUSE_CEREBRAL_ATROPHY	33	0.237467	0.82606	0.764706	0.86785	1
HP_ABNORMALITY_OF_DENTAL_COLOR	20	0.271211	0.825533	0.734072	0.868309	1
GO_NUCLEAR_REPLICATION_FORK	39	0.229428	0.824595	0.759717	0.869455	1
GO_RNA_POLYMERASE_II_REPRESSING_TRANSCRIPTION_FACTOR_BINDING	35	0.236432	0.824412	0.791809	0.869328	1
GO_REGULATION_OF_PROTEIN_LOCALIZATION_TO_CHROMOSOME_TELOMERIC_REGION	13	0.316549	0.824078	0.691667	0.869456	1
GO_POLARIZED_EPITHELIAL_CELL_DIFFERENTIATION	19	0.277953	0.823773	0.712676	0.869535	1
GO_REGULATION_OF_TUBULIN_DEACETYLATION	10	0.323362	0.823279	0.656331	0.869919	1
HP_GENERALIZED_HYPOPIGMENTATION_OF_HAIR	30	0.236983	0.823196	0.734072	0.869623	1
GO_TRANSCRIPTION_COUPLED_NUCLEOTIDE_EXCISION_REPAIR	73	0.205032	0.822521	0.803493	0.870366	1
GO_BRANCHED_CHAIN_AMINO_ACID_TRANSPORT	12	0.309723	0.819949	0.683784	0.87423	1
GO_NEGATIVE_REGULATION_OF_PROTEIN_KINASE_B_SIGNALING	42	0.2205	0.819517	0.84669	0.874534	1
GO_REGULATION_OF_GONAD_DEVELOPMENT	15	0.295288	0.818112	0.693151	0.876409	1
HP_ARRHINENCEPHALY	27	0.2489	0.818007	0.768546	0.876139	1
GO_TERTIARY_ALCOHOL_METABOLIC_PROCESS	16	0.289494	0.814471	0.708934	0.881532	1
GO_SITE_OF_DNA_DAMAGE	77	0.19792	0.814035	0.83871	0.881825	1
GO_HISTONE_H3_DEACETYLATION	20	0.262971	0.81388	0.688172	0.881609	1
GO_MULTI_ORGANISM_LOCALIZATION	64	0.202758	0.813825	0.819923	0.881244	1
GO_NON_RECOMBINATIONAL_REPAIR	87	0.193433	0.813326	0.880734	0.881623	1
GO_ORGANELLE_ENVELOPE_LUMEN	84	0.192522	0.812986	0.883621	0.881732	1
GO_LIGASE_ACTIVITY	136	0.177495	0.812755	0.962733	0.881662	1
GO_REGULATION_OF_HISTONE_MODIFICATION	136	0.178886	0.812299	0.953757	0.881963	1
GO_INOSITOL_PHOSPHATE_CATABOLIC_PROCESS	17	0.275861	0.812118	0.718663	0.881796	1
GO_MIRNA_BINDING	30	0.240123	0.811963	0.747826	0.881585	1
GO_REGULATION_OF_DNA_TEMPLATED_TRANSCRIPTION_IN_RESPONSE_TO_STRESS	111	0.185965	0.81189	0.901235	0.881256	1
GO_CILIARY_TIP	44	0.214843	0.811446	0.820339	0.88154	1
HP_LIPOMA	20	0.267669	0.809441	0.751445	0.88432	1
GO_MICROTUBULE_MINUS_END_BINDING	11	0.319824	0.809103	0.731646	0.884432	1
GO_NEGATIVE_REGULATION_OF_DNA_TEMPLATED_TRANSCRIPTION_ELONGATION	15	0.290003	0.808881	0.722527	0.884331	1
GO_PTERIDINE_CONTAINING_COMPOUND_BIOSYNTHETIC_PROCESS	14	0.297685	0.808774	0.699454	0.884056	1
GO_REGULATION_OF_AUTOPHAGY_OF_MITOCHONDRION_IN_RESPONSE_TO_MITOCHONDRIAL_DEPOLARIZATION	15	0.287186	0.808661	0.70235	0.883792	1
GO_MEMBRANE_PROTEIN_INTRACELLULAR_DOMAIN_PROTEOLYSIS	18	0.273162	0.807363	0.71978	0.885414	1
HP_APLASIA_HYPOPLASIA_OF_THE_THYMUS	30	0.242953	0.806003	0.766154	0.887143	1
GO_RAL_GTPASE_BINDING	15	0.29245	0.805873	0.770667	0.886903	1
HP_EXTRAHEPATIC_CHOLESTASIS	13	0.29883	0.805042	0.736	0.887784	1
GO_PROTECTION_FROM_NON_HOMOLOGOUS_END_JOINING_AT_TELOMERE	10	0.327955	0.804049	0.717073	0.888893	1
GO_RETROMER_COMPLEX	21	0.259163	0.803282	0.757256	0.889653	1
HP_RENAL_TUBULAR_ACIDOSIS	43	0.223834	0.803116	0.797203	0.889459	1
HP_ABNORMALITY_OF_THE_NASAL_SEPTUM	15	0.280047	0.803027	0.733668	0.889158	1
GO_TOLL_LIKE_RECEPTOR_BINDING	12	0.307614	0.802751	0.719895	0.889164	1
HP_HAMARTOMA_OF_THE_EYE	26	0.245746	0.801288	0.791549	0.891018	1
GO_PHOSPHATIDYLINOSITOL_3_KINASE_ACTIVITY	10	0.32474	0.800017	0.720513	0.892592	1
GO_DEACETYLASE_ACTIVITY	39	0.22516	0.799802	0.81672	0.892467	1
GO_TOXIN_TRANSPORT	36	0.22491	0.799711	0.790378	0.892158	1
GO_REGULATION_OF_CELL_PROJECTION_SIZE	11	0.309023	0.799188	0.726542	0.89256	1
HP_RECURRENT_HYPOGLYCEMIA	10	0.323993	0.798552	0.70024	0.893131	1
HP_ADRENAL_HYPERPLASIA	15	0.283815	0.798157	0.739011	0.893298	1
HP_ABNORMAL_TISSUE_METABOLITE_CONCENTRATION	29	0.240328	0.797921	0.791411	0.893198	1
GO_STEROID_HYDROXYLASE_ACTIVITY	24	0.256499	0.797773	0.779104	0.892974	1
GO_POLYUBIQUITIN_MODIFICATION_DEPENDENT_PROTEIN_BINDING	50	0.209576	0.797418	0.829365	0.893069	1
GO_POSITIVE_REGULATION_OF_CHROMATIN_ORGANIZATION	96	0.183991	0.79596	0.906863	0.894815	1
GO_LIGASE_ACTIVITY_FORMING_CARBON_NITROGEN_BONDS	44	0.213507	0.79591	0.825581	0.894451	1
[truncated: 254 more rows]
